# Supplementary material for: Transcriptomic Analysis across Crayfish (<i>Cherax quadricarinatus</i>) Claw Regeneration Reveals Potential Stem Cell Sources for Cultivated Crustacean Meat
Source: Preprints.org preprint supplement (doi:10.20944/preprints202407.0231.v1), 2024-07-03
Supplement: Supplementary file 1 [file supplementary]

## Sheet: S1vS2
transcript_id	baseMean	log2FoldChange	lfcSE	pvalue	padj	S1_1	S1_2	S1_4	S2_1	S2_2	S2_3	S2_4	S3_1	S3_2	S3_3	S3_4	S4_1	S4_2	S4_3	S4_4	S5_1	S5_2	S5_3	S5_4	S6_1	S6_2	S6_4	gene_name
NonamEVm000070t1	10321.2	9.21	1.72191	1.04e-09	6.28e-07	0	48.4858	5.8357	3.74101	55021.6	1237.8	5304.52	24645.3	29888.9	4707.8	158.081	36464.3	1806.54	16474.4	48826.1	172.451	1878.56	218.902	38.7215	40.2581	88.4498	35.2104	NA
NonamEVm000120t1	842.4	4.98	2.50555	3.3e-05	0.00799	5.35758	34.3005	7.29461	11.2248	870.435	98.1685	5735.67	862.481	1782.25	3823.14	13.1764	1736.03	164.465	671.963	1470.1	956.494	0	75.033	131.436	0	70.3168	13.4747	NA
NonamEVm000493t1	209.78	17.63	3.00034	9.83e-10	6.24e-07	0	0	0	0	0	0	149.444	599.076	132.484	26.4536	0	247.65	912.274	567.384	574.066	0	0	753.878	333.29	117.369	0	201.896	Myosin heavy chain, muscle
NonamEVm000985t1	270.74	5.1	1.86153	1.24e-05	0.00334	6.26545	4.15029	6.26586	7.29373	357.168	10.3243	1233.56	158.378	232.524	456.574	10.1181	1254.78	1327.5	58.6858	587.395	0	178.533	42.9632	22.5839	1.274	0	0	Chorion peroxidase
NonamEVm001122t1	396.91	8.57	3.00364	4.79e-06	0.00164	0	0	0	0	787.296	18.6269	303.447	422.714	461.016	97.6132	3.72578	5912.58	52.1736	190.023	482.813	0	0	0	0	0	0	0	NA
NonamEVm001405t1	69.76	19.54	3.05973	3.68e-11	2.59e-08	0	0	0	0	48.0261	0	524.361	110.985	472.496	241.974	0	9.16048	0	76.3117	44.1805	0	0	0	4.08886	0	0	3.07058	Myosin heavy chain, muscle
NonamEVm001725t1	29.39	18.04	2.79142	2.69e-11	2.01e-08	0	0	0	0	0	0	161.427	148.562	80.4253	13.5992	0	6.8754	24.6428	52.3947	49.024	0	0	87.3018	2.0779	8.72273	0	11.4435	Myosin-4
NonamEVm002394t1	25.36	17.57	2.08171	9.74e-18	1.55e-14	0	0	0	1.30381	14.7203	0	65.7463	49.6762	69.5942	13.8667	0	41.3446	45.8905	70.0256	71.1837	0	0	0	84.5693	14.8386	0	15.2621	NA
NonamEVm002504t1	469.22	5.09	1.67818	8.48e-06	0.00256	0	8.44316	27.0509	200.659	1779.02	33.1362	1063.3	288.632	338.231	626.291	404.605	766.455	1646.06	110.299	903.959	757.22	0	843.193	491.403	7.78674	0	27.1689	NA
NonamEVm002807t1	78.16	5.94	3.64322	4.08e-05	0.00924	0	0	2.29592	0	131.172	21.2295	897.958	62.6484	61.843	196.941	0	153.698	21.8806	60.3639	109.495	0	0	0	0	0	0	0	2-hydroxyacylsphingosine 1-beta-galactosyltransferase
NonamEVm003983t1	3354.37	5.28	1.74442	7.94e-06	0.00246	94.6162	73.4533	82.6555	7.8264	19569.5	1654.41	4203.62	3332.76	4404.51	2573.32	776.59	21533	71.5964	2031.58	12607.3	262.487	220.528	85.8595	37.6345	135.775	0	37.1012	NA
NonamEVm004304t1	732.78	20.29	2.1921	4.67e-21	1.48e-17	0	0	0	3.86898	3.99496	0	732.731	2548.73	619.526	279.668	1.86817	854.282	2931.45	1492.5	1583.03	0	271.543	1180.43	1134.39	646.008	0	1837.26	Myosin heavy chain, striated muscle
NonamEVm005119t1	56.88	10.29	5.27702	1.8e-05	0.00475	0	0	0	3.72971	0	0	0	0	0	0	0	4.7565	85.8657	2.32698	0	0	202.782	0	412.456	197.257	151.485	190.736	Histone-lysine N-methyltransferase SETMAR
NonamEVm006520t1	20.57	16.75	2.29178	8.55e-14	8.35e-11	0	0	0	0	22.1746	3.97072	23.2824	0	0	14.2246	335.447	6.15329	28.3071	2.32579	2.1331	0	0	12.3937	2.07503	0	0	0	NA
NonamEVm006700t1	10205.3	5.6	1.18691	1.44e-07	6.52e-05	171.454	174.953	363.724	999.691	54292.4	496.594	11331.5	29492.2	33884.3	25453.7	777.469	9405.34	2780.74	10189.7	35267.8	5561.46	737.704	742.454	1364.89	301.707	366.433	361.176	NA
NonamEVm007039t1	1906.34	4.84	2.65859	4.22e-05	0.00941	26.752	20.5625	65.3894	8.80278	9299.29	100.169	7568.23	5510.82	2869	9170.4	19.4423	1835.4	0	1019.18	3896.92	262.951	65.5661	0	34.4605	97.7677	28.1842	40.2748	NA
NonamEVm007432t1	1039.4	7.38	2.82108	7.82e-06	0.00246	0	2.32128	17.1601	4.89501	12270.9	215.637	310.558	1106.5	2637.11	697.848	3.53138	1340.78	0	410.715	3836.89	0	0	0	8.84167	0	0	3.06606	NA
NonamEVm008981t1	152.51	6.11	2.35322	1.07e-05	0.00294	1.77671	0	2.89747	1.24387	871.665	0	247.97	76.0659	98.0453	117.665	2.00373	222.661	231.95	42.7059	225.136	798.203	248.115	30.8301	136.353	0	0	0	NA
NonamEVm009442t1	36.53	18.72	3.56029	2.18e-08	1.15e-05	0	0	0	0	34.7817	0	361.478	104.135	74.8624	58.6044	0	67.6486	0	2.6195	99.6349	0	0	0	0	0	0	0	NA
NonamEVm010258t1	147.53	14.29	1.98658	1.76e-13	1.6e-10	0	0	0	0	7.04284	0	0	25.0238	9.07398	3.22811	1.98921	93.9349	4.58937	72.0636	33.213	0	0	24.3694	330.969	1114.78	934.684	590.639	NA
NonamEVm010949t1	4635.82	4.33	1.75076	2.26e-05	0.00563	140.572	449.62	72.6149	418.042	21535.3	5729.52	7640.88	10299	7213.83	9062.16	39.5556	3448.65	9699.04	5020.62	8330.66	10312.2	28.9035	1060.73	1392.76	21.8263	47.5157	24.0207	Cuticle protein AM1199
NonamEVm011053t1	43.58	18.77	2.25117	2.01e-17	2.84e-14	0	0	0	3.73471	0	0	227.093	21.6041	26.3435	115.789	0	19.2729	225.718	8.72329	44.3923	15.6544	228.34	12.4484	9.68646	0	0	0	NA
NonamEVm011433t1	274.95	16.77	3.82338	3.71e-07	0.000162	0	0	0	94.9745	0	11.7224	7.92556	0.502122	1.02699	19.7848	0	18.8202	0	0.594546	0	4249.94	1304.96	0	0	0	338.579	0	NA
NonamEVm011916t1	216.58	20.86	2.68226	1.45e-15	1.84e-12	0	0	0	0	1129.35	0	225.98	460.777	819.029	295.728	0	359.852	90.5488	459.169	554.429	0	0	5.90022	63.023	254.77	0	46.3022	Actin-11
NonamEVm012189t1	387.72	5.14	2.65123	3.34e-05	0.00799	10.3393	0	1.86774	17.9419	1345.24	32.6229	461.397	1552.11	727.656	477.156	0	365.933	95.5913	34.2503	624.839	30.1255	78.011	950.395	1690.96	27.8224	0	5.66774	NA
NonamEVm012335t1	310.77	18.02	3.05398	8.34e-10	5.58e-07	0	0	0	31.2607	0.220709	104.262	76.7104	1861.96	1641.93	141.122	0.286759	0	0	767.263	0.760435	501.528	0	0	757.155	0	333.088	619.44	Cuticle protein AMP1B
NonamEVm012352t1	19016.6	7.09	1.86367	9.56e-07	0.000379	164.608	122.306	65.9576	158.75	114399	80.6103	6518.64	70114.4	64147.2	10689.1	88.144	27240.5	38.5241	33157.6	88327.2	48.2722	1385.56	382.148	32.1711	667.217	293.073	244.698	NA
NonamEVm012980t1	80.01	7.95	3.18389	8.73e-06	0.00258	0	0	0	438.215	119.615	17.2601	298.163	80.7567	114.017	227.714	0	53.5616	0	20.1368	195.012	0	0	0	8.25001	0	150.472	37.0039	NA
NonamEVm013336t1	82.11	-14.31	5.52261	6.38e-06	0.00208	1.6815	0	0	0	0	0	0	0	0	0	0	0	104.06	0	0	354.618	906.248	337.951	5.01577	0	83.8397	13.0604	Endocuticle structural glycoprotein SgAbd-8
NonamEVm013488t1	10200.6	5.7	2.61232	2.07e-05	0.00526	0	9.50312	1.46236	968.376	0	0	1622.23	3363.75	1301.28	1719.39	291.419	3296.77	3218.81	3945.73	4123.84	3543.98	93.4248	389.47	23013.8	39787.2	4746.23	128977	Troponin C
NonamEVm013495t1	154.04	14.34	2.22034	2.47e-11	1.96e-08	0	0	0	0	1.84678	0	6.65302	4.40926	9.0992	18.718	0	426.652	186.075	77.1755	70.7018	0	0	49.6958	656.538	1015.09	0	866.115	Troponin C, isoform 2
NonamEVm013563t1	619.24	9.09	2.41464	8.03e-07	0.000329	0	0	0	14.9479	1096.21	0	17.9165	84.351	41.4899	42.6201	0	136.665	47.1352	249.11	1883.7	2667.57	1362.83	1020.39	2336.06	242.632	2339.18	40.5376	Cuticle protein AM1239
NonamEVm013603t1	4829.55	6.01	2.26631	1.02e-05	0.00288	35.6397	19.1359	7.18141	16.092	13194.7	8.08332	392.187	8780.19	5454.79	939.879	7.66947	30219.9	161.26	8107.03	30251.4	1290.01	4991.82	315.385	707.716	43.7326	1273.37	32.997	Cuticle protein AMP1A
NonamEVm015160t1	90.4	7.93	2.42817	2.49e-06	0.000878	0	0	0	0	155.754	148.562	278.536	97.5567	71.4352	242.761	4.51424	48.8423	665.555	8.98992	121.62	0	116.533	18.8469	7.12769	0	0	2.16876	NA
NonamEVm015632t1	116.72	20.8	2.12641	2.79e-23	1.77e-19	0	0	0	0	901.873	1.97706	5.81984	98.5416	130.325	32.4297	0	38.8485	861.918	75.8634	20.1109	78.1641	198.752	80.228	23.597	14.218	0	5.25216	Cuticle protein AM1159
NonamEVm017431t1	526.48	14.89	2.76449	1.13e-08	6.52e-06	0	0	0	16.1419	0.617181	0	0	0	1.01662	0	0	14.2165	5717.33	0	2.14813	2547.85	2342.53	764.954	68.3408	58.2456	40.6374	8.50993	NA
NonamEVm019302t1	643.84	21.21	2.16589	2.3e-23	1.77e-19	0	0	0	0	969.452	0	420.144	4156.78	2123.5	1268.32	5.19871	480.57	292.409	1709.27	964.395	0	186.004	0	201.663	1039.11	11.2299	336.327	Actin, muscle-type A2
NonamEVm019352t1	31.64	6.13	1.59468	1.36e-06	0.000509	0	0	0	11.1373	62.0595	17.6756	39.3202	54.0784	92.0047	49.8192	114.861	40.5146	109.736	64.0502	28.1675	0	0	6.13073	3.46195	0	0	3.15155	NA
NonamEVm019835t1	695.42	10.05	2.23101	9.09e-08	4.44e-05	0	0	1.20138	0	510.202	0	2472.28	3146.05	2000.01	2284.34	4.60925	379.449	249.792	1302.71	1204.65	64.8932	222.135	15.3399	247.936	900.47	125.669	167.596	Actin
NonamEVm020885t1	111.65	17.69	2.63186	4.96e-12	4.2e-09	0	0	0	0	15.3977	11.9457	89.026	3.43147	11.1273	26.4787	0	7.52943	698.827	9.28982	14.4894	0	0	1379.52	185.127	0	0	4.15214	NA
NonamEVm021116t1	78.4	-20.75	4.99138	3.97e-07	0.000168	0	0	385.524	0	0	0	0	0	0	1.2913	0	0	0	0	0	0	0	0	60.7782	704.756	510.11	62.3859	NA
NonamEVm021671t1	536.38	4.13	1.90978	3.53e-05	0.00814	7.1243	14.1655	23.2689	36.0946	1568.53	39.8678	706.955	1255.91	3277.31	1765.8	37.9162	139.947	138.631	865.299	1603.1	156.514	5.84879	99.5471	37.3595	7.62439	0	13.518	NA
NonamEVm022556t1	46.19	12.43	4.65978	6.21e-06	0.00207	0	0	0	0	0.934551	5.84914	1.25185	0	0	2.64464	159.901	2.03513	399.667	0	0	126.05	265.561	48.7397	3.54382	0	0	0	NA
NonamEVm023445t1	520.14	8.18	2.43916	2.04e-06	0.000741	0	0	0	113.15	99.7984	0	462.827	546.405	525.016	266.667	1.59389	543.843	452.127	546.76	607.166	125.076	0	24.8898	839.749	3190.45	110.806	2986.79	NA
NonamEVm023520t1	698.3	18.93	2.03613	3.93e-21	1.48e-17	0	0	0	96.7266	0	0	151.259	268.762	108.1	129.106	50.0678	211.214	175.029	290.919	278.829	308.419	0	0	1429.52	3205.51	1919.1	6740.1	NA
NonamEVm024114t1	90.55	8.81	2.40741	1.02e-06	0.000394	0	0	0	0	669.388	184.125	105.699	133.91	251.669	206.571	0	112.583	27.9479	62.7441	228.658	0	0	0	3.45409	2.17708	0	3.14504	NA
NonamEVm024727t1	40.94	18.18	2.15128	8.6e-18	1.55e-14	0	0	0	0	40.5996	0	91.3981	29.3826	179.345	79.3515	3.58265	61.861	52.314	210.548	73.6461	0	0	0	62.1048	0	0	16.5981	NA
NonamEVm025328t1	49.64	3.53	1.52117	3.4e-05	0.00799	3.56221	5.90076	13.0914	27.3759	23.7358	345.171	203.684	67.1885	79.471	160.899	38.6815	20.0752	19.1187	29.6245	17.0564	0	0	31.1363	6.22003	0	0	0	NA
NonamEVm025444t1	39.4	17.01	2.2166	5.35e-15	5.66e-12	0	0	0	0	4.55377	0	54.1586	55.3356	102.202	122.224	0	51.0877	98.9807	187.297	66.6038	0	0	0	61.3435	57.6157	0	5.30441	NA
NonamEVm026485t1	25.56	18.4	3.48235	1.97e-08	1.09e-05	0	0	0	270.677	26.3332	0	2.05402	2.96217	0	0	241.963	4.55164	0	0	3.42193	0	0	6.0184	0	0	0	4.27515	NA
NonamEVm027079t1	150.78	6.82	3.28361	1.87e-05	0.00484	0	0	0	0	345.828	0	172.672	213.653	662.991	120.087	0	192.829	78.2473	497.403	450.753	109.412	0	105.716	64.9109	158.706	85.9052	58.0727	Actin
NonamEVm029093t1	44.1	17.99	2.07532	1.33e-18	2.82e-15	0	0	0	1.24082	37.824	0	73.9207	89.6334	114.168	52.2613	0	85.0409	71.0061	303.406	57.8999	0	0	0	53.1418	10.8668	0	19.7269	NA
NonamEVm043137t1	67.46	14.58	2.81234	2.64e-08	1.34e-05	0	0	0	0	6.15085	5.9347	1.24485	0	1.51661	5.16936	198.871	3.91863	662.46	2.32483	0.852659	0	0	524.857	60.1452	3.26704	0	7.30408	NA
NonamEVm044792t1	44.21	19.23	2.09258	1.02e-20	2.6e-17	0	0	0	0	11.862	0	267.303	68.0505	56.4651	45.5224	1.54955	51.2217	29.1713	249.075	98.6541	0	0	35.2949	18.1864	1.196	0	39.1596	NA

## Sheet: S1vS3
transcript_id	baseMean	log2FoldChange	lfcSE	pvalue	padj	S1_1	S1_2	S1_4	S2_1	S2_2	S2_3	S2_4	S3_1	S3_2	S3_3	S3_4	S4_1	S4_2	S4_3	S4_4	S5_1	S5_2	S5_3	S5_4	S6_1	S6_2	S6_4	gene_name
NonamEVm000070t1	10321.2	8.74	1.81912	1.27e-09	5.86e-07	0	48.4858	5.8357	3.74101	55021.6	1237.8	5304.52	24645.3	29888.9	4707.8	158.081	36464.3	1806.54	16474.4	48826.1	172.451	1878.56	218.902	38.7215	40.2581	88.4498	35.2104	NA
NonamEVm000120t1	842.4	4.98	1.91807	3.79e-05	0.00494	5.35758	34.3005	7.29461	11.2248	870.435	98.1685	5735.67	862.481	1782.25	3823.14	13.1764	1736.03	164.465	671.963	1470.1	956.494	0	75.033	131.436	0	70.3168	13.4747	NA
NonamEVm000493t1	209.78	19.87	2.98849	6.13e-12	3.85e-09	0	0	0	0	0	0	149.444	599.076	132.484	26.4536	0	247.65	912.274	567.384	574.066	0	0	753.878	333.29	117.369	0	201.896	Myosin heavy chain, muscle
NonamEVm000818t1	915.94	2.82	0.956353	7.69e-05	0.00886	64.1895	240.907	59.7212	197.992	1658.33	506.059	507.343	834.603	1154.04	635.526	1905.21	2269.03	1754.43	1346.67	1812.73	970.647	112.601	1654.33	1610.01	281.514	437.09	137.646	NA
NonamEVm000926t1	74.62	5.97	1.78399	4.46e-06	0.000934	0	2.35876	0	12.4356	124.14	3.98899	193.15	84.7701	86.9972	192.401	270.155	106.677	337.867	12.1877	207.916	0	0	0	3.45262	0	0	3.10897	Phenoloxidase-activating factor 2
NonamEVm001122t1	396.91	7.64	2.85201	6.94e-06	0.0013	0	0	0	0	787.296	18.6269	303.447	422.714	461.016	97.6132	3.72578	5912.58	52.1736	190.023	482.813	0	0	0	0	0	0	0	NA
NonamEVm001154t1	608.83	3.95	1.05185	1.03e-05	0.00173	75.0469	68.4903	35.2899	580.678	167.797	131.836	763.967	337.064	180.552	489.695	4520.22	653.115	8.95667	278.09	400.296	1388.11	540.544	781.429	710.679	404.51	305.181	572.732	NA
NonamEVm001273t1	251.75	5.45	2.15943	2.97e-05	0.00423	1.75455	6.13168	1.43276	0	558.458	8.888	1005.78	413.29	640.352	1160.21	13.2545	556.058	9.73515	256.599	578.052	281.61	0	0	20.0094	19.7092	0	7.16355	Chorion peroxidase
NonamEVm001405t1	69.76	20.07	3.06527	1.17e-11	6.73e-09	0	0	0	0	48.0261	0	524.361	110.985	472.496	241.974	0	9.16048	0	76.3117	44.1805	0	0	0	4.08886	0	0	3.07058	Myosin heavy chain, muscle
NonamEVm001501t1	223.35	5.51	1.61022	5.88e-06	0.00116	1.7834	0	2.91333	4.98304	118.339	0	226.014	76.5046	230.755	169.113	223.04	331.682	2633.56	98.6891	396.091	62.6534	106.244	149.737	22.1281	3.26509	52.11	4.14904	Phenoloxidase-activating factor 2
NonamEVm001555t1	468.7	-3.8	0.852238	1.36e-06	0.000329	233.437	1297.57	4566.84	402.11	181.332	341.383	360.05	78.4953	98.745	79.5088	186.699	742.695	379.742	169.673	201.339	469.605	79.4106	218.082	141.037	22.8529	56.6028	4.15093	Hemocyte protein-glutamine gamma-glutamyltransferase
NonamEVm001597t1	197.7	4.7	1.38006	1.24e-05	0.00202	0	0	5.07392	6.28185	19.6132	19.1192	86.6289	128.607	103.487	129.654	11.71	297.67	223.467	444.563	256.845	95.5831	0	188.002	284.105	1067.17	391.339	590.48	NA
NonamEVm001725t1	29.39	18.62	2.79653	6.42e-12	3.86e-09	0	0	0	0	0	0	161.427	148.562	80.4253	13.5992	0	6.8754	24.6428	52.3947	49.024	0	0	87.3018	2.0779	8.72273	0	11.4435	Myosin-4
NonamEVm001996t1	6309.13	-5.38	1.24346	4.44e-07	0.000116	637.033	123.104	30750.2	3223.84	319.435	1806.14	50.4872	62.3233	129.833	129.357	218.147	421.101	148.286	48.3764	74.8733	9267.49	51427.1	17368.7	3673.33	3534.72	4891.65	10495.3	Phosphoenolpyruvate carboxykinase [GTP]
NonamEVm001997t1	5392.31	-5.23	1.39093	3.43e-06	0.000729	2101.75	82.6964	60896.2	11063.7	62.7746	279.987	253.706	158.575	116.421	297.121	489.443	592.824	54.4128	128.691	106.164	3480.96	4185.19	6174.04	1690.3	3126.56	9707.74	13581.7	Phosphoenolpyruvate carboxykinase [GTP], mitochondrial
NonamEVm002394t1	25.36	18.26	2.0789	4.68e-19	8.08e-16	0	0	0	1.30381	14.7203	0	65.7463	49.6762	69.5942	13.8667	0	41.3446	45.8905	70.0256	71.1837	0	0	0	84.5693	14.8386	0	15.2621	NA
NonamEVm002701t1	210.93	7.62	2.40407	2.12e-06	0.000473	0	3.57628	0	1.25694	4.21178	12.0888	2.10367	147.533	8.18182	0	3298.38	874.051	51.4929	48.8588	188.048	0	0	0	0.698247	0	0	0	Endochitinase
NonamEVm003551t1	31136.2	-5.68	2.15999	2.17e-05	0.00327	47.8253	7.8899	174.762	218.808	1.40718	0	1.46933	1.38729	0	0	0	0.790109	99.6482	1.93528	1.30281	180283	234414	116966	63295.9	35564.9	14840.8	39074.1	NA
NonamEVm003797t1	4519.04	2.93	0.862263	3.52e-05	0.00472	236.719	272.442	512.273	983.699	4395.85	1042.66	684.391	7453.41	3509.34	1294.72	772.412	5483.29	6165.57	5192.89	2722.26	1641.82	4491.2	4083.81	6754.34	22018	12590.9	7116.96	Tubulin alpha chain
NonamEVm003944t1	50.68	-21.46	2.94288	5.46e-14	4.44e-11	22.0924	0	66.9366	97.0144	0	0	0.849879	0	0	0	0	0	0	2.37678	0.871968	0	0	684.153	7.77531	127.012	36.9476	68.8211	Sialin
NonamEVm004304t1	732.78	22.46	2.19266	2.14e-25	1.48e-21	0	0	0	3.86898	3.99496	0	732.731	2548.73	619.526	279.668	1.86817	854.282	2931.45	1492.5	1583.03	0	271.543	1180.43	1134.39	646.008	0	1837.26	Myosin heavy chain, striated muscle
NonamEVm006471t1	882.88	8.78	2.10931	3.22e-08	1.14e-05	3.58714	4.75358	4.39439	11.2775	149.446	30.1392	0.419444	78.8527	61.1649	3.25334	16782.1	1123.55	22.9173	623.812	493.069	0	0	25.0846	1.39182	0	0	4.17859	NA
NonamEVm006491t1	1038.98	6.66	1.67757	3.3e-07	9.06e-05	0	7.66464	16.1629	1.15436	528.461	49.8808	1005.58	2953.51	1079.9	569.785	3346.95	7588.33	3.8262	993.834	3490.9	410.452	649.912	80.4884	18.6587	30.0808	0	32.0385	NA
NonamEVm006520t1	20.57	19.48	2.28134	3.44e-18	4.32e-15	0	0	0	0	22.1746	3.97072	23.2824	0	0	14.2246	335.447	6.15329	28.3071	2.32579	2.1331	0	0	12.3937	2.07503	0	0	0	NA
NonamEVm006700t1	10205.3	5.77	1.17509	1.94e-08	7.67e-06	171.454	174.953	363.724	999.691	54292.4	496.594	11331.5	29492.2	33884.3	25453.7	777.469	9405.34	2780.74	10189.7	35267.8	5561.46	737.704	742.454	1364.89	301.707	366.433	361.176	NA
NonamEVm006722t1	185.78	4.19	0.726319	1.25e-09	5.86e-07	14.2331	20.0449	15.9806	80.81	246.738	71.6971	133.16	429.038	349.588	329.451	410.574	593.559	450.352	206.749	727.21	0	0	0	6.90942	0	0	1.03824	Leukocyte elastase inhibitor A
NonamEVm006871t1	425.41	8.84	1.9965	8.8e-09	3.68e-06	0	0	0	16.1552	20.6595	3.95503	32.4281	226.641	43.612	33.078	719.85	284.293	2927.25	42.0156	300.379	1203.82	2798.63	401.232	69.4018	67.8065	146.893	21.005	NA
NonamEVm007039t1	1906.34	5.08	1.98368	3.71e-05	0.00489	26.752	20.5625	65.3894	8.80278	9299.29	100.169	7568.23	5510.82	2869	9170.4	19.4423	1835.4	0	1019.18	3896.92	262.951	65.5661	0	34.4605	97.7677	28.1842	40.2748	NA
NonamEVm007133t1	117.33	5.68	3.23828	7.15e-05	0.00845	0	0	0	0	55.4093	0	5.39512	91.0091	46.0722	2.5903	414.051	557.414	0.917533	108.374	293.071	858.387	84.9912	0	39.4978	0	0	24.1254	NA
NonamEVm007731t1	242.38	-18.72	2.70613	1.11e-12	8.08e-10	0	2.53577	6.94039	23.2084	0	0	0	0	0	0	0	5.1633	2796.73	3.9331	5.14284	867.585	1424.1	103.399	39.9893	45.7079	0	7.98569	Cuticle protein AMP1A
NonamEVm007834t1	20317.8	6.3	1.73978	1.6e-06	0.000368	0	29.1966	52.5374	2652.51	10.6403	0	7089.9	13928	3919.27	5057.48	277.273	3768.37	5559.26	8706.21	5984.3	466.149	464.286	219.502	10481.5	211475	15822.9	151026	Actin, muscle-type A2
NonamEVm008225t1	1423.69	-20.13	3.21194	6.84e-11	3.78e-08	9.25746	8.62801	0	11.6901	0	2.04273	0	0	0	0	0	0	22116.5	0	0	1713.99	6896.99	332.129	71.1855	38.2064	99.3027	21.4113	NA
NonamEVm009277t1	10548.1	-16.2	4.68393	1.75e-06	0.000396	22.1156	0	0	0	0	8.21294	0	0	0	0	0	0	3850.34	0	0	25571.5	200670	1255.59	612.904	59.2727	1.79504	6.68822	NA
NonamEVm009442t1	36.53	17.99	3.69752	6.82e-08	2.3e-05	0	0	0	0	34.7817	0	361.478	104.135	74.8624	58.6044	0	67.6486	0	2.6195	99.6349	0	0	0	0	0	0	0	NA
NonamEVm009509t1	72.11	-3.7	1.37718	7.94e-05	0.00899	835.665	202.652	40.3644	94.3678	11.7317	111.456	4.97894	2.97701	5.59659	6.52454	44.1982	5.70401	0.930706	10.5774	2.5815	62.537	16.3149	12.2108	72.6523	2.20213	31.6072	8.54614	NA
NonamEVm009846t1	7071.01	-6.25	1.52347	3.34e-07	9.06e-05	2244.79	216.083	1970.29	4286.34	2.73455	1416.04	15.2448	9.82685	4.49657	15.9633	3.98888	0	0	0	6.16434	5216.59	9597.09	10791.4	6912.07	12803.6	23739.1	76310.5	NA
NonamEVm010093t1	1073.85	5.98	2.12856	1.3e-05	0.0021	0	0	2.90577	2.48829	269.216	5.96864	21.6517	259.933	582.661	51.7772	18.7669	986.41	16374.6	352.681	122.565	469.403	2146.17	801.071	1127.12	26.1653	0	3.12679	Crustacyanin-C1 subunit
NonamEVm010097t1	4483.4	3.01	0.883373	3.38e-05	0.00463	558.23	358.141	394.733	225.727	1228.7	216.808	844.05	7458.38	4590.68	1198.44	4670.4	5524.67	41075.8	2923.21	10525.7	2957.2	3482.65	6131.84	3491.94	279.146	237.381	260.978	Crustacyanin-C1 subunit
NonamEVm010244t1	14314	-14.97	4.92237	3.41e-06	0.000729	0	0	1.91044	2.40841	0	0	0	0	0	0	0	0	5715.18	0	0	42820.3	264661	910.867	372.438	165.399	212.385	46.5493	NA
NonamEVm010258t1	147.53	16.57	1.92392	2.28e-18	3.15e-15	0	0	0	0	7.04284	0	0	25.0238	9.07398	3.22811	1.98921	93.9349	4.58937	72.0636	33.213	0	0	24.3694	330.969	1114.78	934.684	590.639	NA
NonamEVm010397t1	55.45	5.45	2.6541	5.58e-05	0.00684	0	0	0	0	0.92403	0	45.2553	255.046	26.8516	7.12915	0.399581	51.5029	55.5767	74.6445	109.455	0	70.7085	49.2813	50.6271	189.082	2.25699	231.078	Actin-2
NonamEVm010519t1	2481.69	3.35	1.10951	5.67e-05	0.00688	115.966	135.119	87.212	108.137	1009.37	115.618	379.025	2673.19	2210.58	748.913	1225.54	2348.26	29895.7	1825.36	2095.78	1723.3	1218.91	3656.05	2865.76	14.9425	114.772	29.7664	Crustacyanin-A2 subunit
NonamEVm010620t1	950.35	8.38	3.1067	5.48e-06	0.00111	0	0	1.11095	4.7627	1.6539	0	266.289	2541.04	227.699	144.786	0	442.642	2446.66	2047.41	1573.49	0	241.613	5453.5	1191.03	1139.41	0	3184.54	Myosin heavy chain, muscle
NonamEVm010796t1	246.63	-17.64	3.45969	2.77e-08	1.06e-05	6.25632	0	0	0	0	14.6222	0.366488	0	0	0	0	0.251118	680.119	0	0	476.277	3668.81	299.143	277.11	2.91161	0	0	NA
NonamEVm010952t1	1766.59	5.2	1.99832	3.17e-05	0.00443	0	0	78.1224	1224.18	421.182	3.98092	4846.35	2377.65	2614.72	8467.85	5.58831	919.688	873.452	1388.29	922.719	234.682	0	397.61	1914.71	2533.63	3461.7	6178.91	Muscle-specific protein 20
NonamEVm011053t1	43.58	18.31	2.2535	1.27e-16	1.46e-13	0	0	0	3.73471	0	0	227.093	21.6041	26.3435	115.789	0	19.2729	225.718	8.72329	44.3923	15.6544	228.34	12.4484	9.68646	0	0	0	NA
NonamEVm011054t1	327.01	3.16	0.856573	1.83e-05	0.00281	21.8834	31.9023	50.177	76.327	219.037	167.973	648.711	113.694	132.485	486.649	838.911	354.271	561.164	130.369	237.617	756.377	868.606	261.714	1034.34	38.7066	101.959	61.3836	NA
NonamEVm011433t1	274.95	12.82	5.44445	1.02e-05	0.00173	0	0	0	94.9745	0	11.7224	7.92556	0.502122	1.02699	19.7848	0	18.8202	0	0.594546	0	4249.94	1304.96	0	0	0	338.579	0	NA
NonamEVm011816t1	25.22	-5.45	2.85833	6.7e-05	0.00798	1.75162	0	390.269	51.6916	6.43545	0	8.21453	0.990013	0	0.649999	0	33.9843	1.86294	0	0.85735	0	0	6.00335	2.08996	0	42.5212	7.52454	NA
NonamEVm011916t1	216.58	21.1	2.68431	7.58e-16	8.06e-13	0	0	0	0	1129.35	0	225.98	460.777	819.029	295.728	0	359.852	90.5488	459.169	554.429	0	0	5.90022	63.023	254.77	0	46.3022	Actin-11
NonamEVm012018t1	5910.77	-5.62	1.81674	1.04e-05	0.00173	462.118	4.54226	617.915	292.53	2.87008	6.23867	0.702647	1.90736	0	1.25467	6.5708	15.3175	243.72	0.564777	3.30987	16448	70169.6	5873.13	6566.53	6395.98	6947.32	15976.7	NA
NonamEVm012189t1	387.72	5.95	1.89971	7.28e-06	0.00134	10.3393	0	1.86774	17.9419	1345.24	32.6229	461.397	1552.11	727.656	477.156	0	365.933	95.5913	34.2503	624.839	30.1255	78.011	950.395	1690.96	27.8224	0	5.66774	NA
NonamEVm012335t1	310.77	21.91	3.03972	9.46e-14	7.26e-11	0	0	0	31.2607	0.220709	104.262	76.7104	1861.96	1641.93	141.122	0.286759	0	0	767.263	0.760435	501.528	0	0	757.155	0	333.088	619.44	Cuticle protein AMP1B
NonamEVm012352t1	19016.6	6.89	1.79588	4.21e-07	0.000112	164.608	122.306	65.9576	158.75	114399	80.6103	6518.64	70114.4	64147.2	10689.1	88.144	27240.5	38.5241	33157.6	88327.2	48.2722	1385.56	382.148	32.1711	667.217	293.073	244.698	NA
NonamEVm012515t1	3397.78	7.17	1.76272	1.26e-07	3.88e-05	7.16858	53.5454	4.38478	0	4348.72	57.8358	609.232	20942.7	6891.32	2550.25	12.5191	6325.47	9388.4	6998.44	14039.9	1408.37	875.063	80.9298	104.82	28.7201	0	23.3555	Cuticle protein AM1159
NonamEVm012980t1	80.01	5.49	3.03537	7.35e-05	0.00861	0	0	0	438.215	119.615	17.2601	298.163	80.7567	114.017	227.714	0	53.5616	0	20.1368	195.012	0	0	0	8.25001	0	150.472	37.0039	NA
NonamEVm013038t1	305.38	-17.05	4.42773	8.74e-07	0.000216	7.16861	0	0	28.9468	0	3.93975	0	0	0	0	0	0	260.766	0	0	855.976	4917.8	547.613	70.4048	25.7973	0	0	Endocuticle structural glycoprotein SgAbd-8
NonamEVm013039t1	486.19	-19.99	3.27023	1.77e-10	9.43e-08	35.7106	0	0	22.5104	0	3.74393	0	0	0	0	0	0	1649.75	0	0	2256.03	5767.37	408.673	270.897	59.7711	166.277	55.5165	Endocuticle structural glycoprotein SgAbd-8
NonamEVm013336t1	82.11	-14.14	5.42067	6.77e-06	0.00129	1.6815	0	0	0	0	0	0	0	0	0	0	0	104.06	0	0	354.618	906.248	337.951	5.01577	0	83.8397	13.0604	Endocuticle structural glycoprotein SgAbd-8
NonamEVm013356t1	609.16	-17.79	3.69702	8.05e-08	2.65e-05	33.8582	11.8485	0	171.086	0	25.6606	0	0	0	0	0	0	8943.43	0	0	1414.7	2074.05	640.883	34.3346	43.0614	0	8.53973	Cuticle protein AM1159
NonamEVm013488t1	10200.6	7.34	1.98297	4.66e-07	0.000119	0	9.50312	1.46236	968.376	0	0	1622.23	3363.75	1301.28	1719.39	291.419	3296.77	3218.81	3945.73	4123.84	3543.98	93.4248	389.47	23013.8	39787.2	4746.23	128977	Troponin C
NonamEVm013495t1	154.04	16.14	2.16707	2.45e-14	2.11e-11	0	0	0	0	1.84678	0	6.65302	4.40926	9.0992	18.718	0	426.652	186.075	77.1755	70.7018	0	0	49.6958	656.538	1015.09	0	866.115	Troponin C, isoform 2
NonamEVm013603t1	4829.55	5.92	1.85436	6.57e-06	0.00128	35.6397	19.1359	7.18141	16.092	13194.7	8.08332	392.187	8780.19	5454.79	939.879	7.66947	30219.9	161.26	8107.03	30251.4	1290.01	4991.82	315.385	707.716	43.7326	1273.37	32.997	Cuticle protein AMP1A
NonamEVm013704t1	1057.4	-4.81	2.24715	7.66e-05	0.00886	69.8022	13.7675	63.1158	207.159	1.30892	17.4077	0.331329	1.56643	0	0	0	0	0	4.32899	1.36088	2290.4	1039.23	10058.2	7205.13	464.662	36.0104	1788.87	NA
NonamEVm013840t1	27.08	-6.35	2.68608	2.18e-05	0.00327	91.0061	214.856	5.68456	52.9808	0.614385	205.261	2.05233	0	0	0	0.804571	8.95098	0	0	0.431485	0	0	0	0	5.54247	0	7.65572	NA
NonamEVm014334t1	369.14	6.47	2.9103	2.55e-05	0.00371	0	0	0	11.097	0	0	14.7831	565.599	27.9942	0.655563	0	195.682	628.605	665.841	535.575	0	1653.63	297.921	371.357	1670.74	74.0334	1407.46	Actin
NonamEVm014657t1	36.24	5.06	2.12509	4.78e-05	0.00595	0	1.39123	0	0	71.6335	9.10675	43.923	204.03	35.8746	36.2415	12.8965	30.5432	31.2312	153.667	75.735	55.4098	3.03788	2.54597	27.3072	2.62804	0	0	NA
NonamEVm014702t1	24.31	5.55	2.34849	3.48e-05	0.00471	0	0	0	89.4359	6.7774	21.7929	50.2917	19.6639	20.7628	177.364	15.9695	37.2977	0	19.7964	36.302	0	0	6.18399	33.2427	0	0	0	NA
NonamEVm014828t1	1042.73	5.25	1.51601	6.84e-06	0.00129	0	12.9515	28.7969	12.4078	5.86278	9.7572	700.146	3011.37	804.199	1148.38	20.8921	362.795	8021.26	1039.73	2573.37	1796.8	1473.19	987.141	904.824	14.3178	0	11.7685	NA
NonamEVm014837t1	221.94	-7.23	2.1339	1.41e-06	0.000336	5.29558	72.7823	455.835	329.106	18.4476	134.819	0	0	1.51922	0	0	1.69892	0	2.9215	5.99169	0	0	0	3.47322	203.611	2240.54	1406.56	NA
NonamEVm014854t1	12049.2	-6.09	1.37206	1.04e-07	3.26e-05	210.039	294.195	206.965	749.772	1.95028	215.806	9.53136	0	2.13859	2.73568	2.0485	5.27861	0	0.61538	0	54175	114615	56400.3	34260	1914.01	1268.08	750.208	NA
NonamEVm015160t1	90.4	6.6	2.33455	8.3e-06	0.00149	0	0	0	0	155.754	148.562	278.536	97.5567	71.4352	242.761	4.51424	48.8423	665.555	8.98992	121.62	0	116.533	18.8469	7.12769	0	0	2.16876	NA
NonamEVm015632t1	116.72	19.07	2.12826	8.67e-20	2e-16	0	0	0	0	901.873	1.97706	5.81984	98.5416	130.325	32.4297	0	38.8485	861.918	75.8634	20.1109	78.1641	198.752	80.228	23.597	14.218	0	5.25216	Cuticle protein AM1159
NonamEVm015791t1	2923.04	5.37	2.37323	4.5e-05	0.00566	0	5.88513	0	1033.25	3.70134	0	182.772	238.024	539.9	807.861	56.6136	0	495.449	1243.9	200.791	2842.65	241.145	15744.6	3913.89	911.189	30850.7	4994.43	NA
NonamEVm016365t1	114.57	7.47	2.96957	1.03e-05	0.00173	0	0	0	1.22069	7.91078	0	155.801	256.742	371.149	355.97	0	77.3229	99.9344	209.526	396.033	0	0	13.1954	121.444	137.269	0	316.961	NA
NonamEVm016442t1	950.13	-18.39	2.7021	2.41e-12	1.59e-09	1.57258	2.72499	2.56081	50.1059	0.274252	3.4729	0	0	0	0	0	0	850.774	0	0	5418.09	12881.3	1154.08	435.364	44.3051	42.1143	16.0589	Cuticle protein AMP4
NonamEVm016539t1	3027.25	-4.5	1.94874	7.79e-05	0.00889	210.685	8.23334	283.08	156.014	0	24.5942	0	1.518	1.53906	0	5.69302	2.64476	60.4126	1.79616	1.74679	3819.34	12863.8	18153	6416.32	7502.89	6307.79	10778.5	NA
NonamEVm017431t1	526.48	7.37	4.69817	5.6e-05	0.00684	0	0	0	16.1419	0.617181	0	0	0	1.01662	0	0	14.2165	5717.33	0	2.14813	2547.85	2342.53	764.954	68.3408	58.2456	40.6374	8.50993	NA
NonamEVm018187t1	1064.08	-6.83	1.80328	5.41e-07	0.000136	850.826	17.9738	1507.68	817.578	0.939901	212.933	1.24443	0	10.5709	0	0	4.45697	0	4.7375	4.34365	111.23	125.328	94.3228	50.0547	2993.87	9304.01	7297.61	NA
NonamEVm018294t1	246.02	-22.03	2.87001	2.8e-15	2.58e-12	2.02056	0	19.6099	53.8966	0	4.58586	0	0	0	0	0	0.218525	950.226	0	0	1950.85	1430.76	720.553	54.0692	28.82	172.523	24.2477	NA
NonamEVm018652t1	5673.68	-6.01	1.43465	3.34e-07	9.06e-05	10841.8	3332.42	3865.06	30054.5	25.2945	1867.11	105.742	33.4529	44.1065	40.8156	55.5478	98.9995	0.457783	9.32279	38.8989	2378.45	1569.16	31377.4	8961.1	11932	3767.02	14422.2	NA
NonamEVm019302t1	643.84	23.6	2.16658	1.77e-28	2.44e-24	0	0	0	0	969.452	0	420.144	4156.78	2123.5	1268.32	5.19871	480.57	292.409	1709.27	964.395	0	186.004	0	201.663	1039.11	11.2299	336.327	Actin, muscle-type A2
NonamEVm019352t1	31.64	7.13	1.55101	1.19e-08	4.83e-06	0	0	0	11.1373	62.0595	17.6756	39.3202	54.0784	92.0047	49.8192	114.861	40.5146	109.736	64.0502	28.1675	0	0	6.13073	3.46195	0	0	3.15155	NA
NonamEVm019456t1	440.2	7.48	2.26016	1.51e-06	0.000354	0	2.36015	1.45513	3.73295	52.3899	0	765.202	1188.75	1019.48	865.887	0	641.141	601.339	1738.21	916.986	31.2897	0	853.999	447.481	267.36	190.095	97.34	NA
NonamEVm019735t1	20.28	-4.96	1.5245	1.35e-05	0.00215	100.942	99.9824	7.21956	53.3158	1.23125	102.35	33.1775	0	0.506462	1.29634	1.99776	28.4628	2.29949	1.16663	11.544	0	0	0	0.693639	0	0	0	NA
NonamEVm019835t1	695.42	11.31	2.27264	1.99e-09	8.87e-07	0	0	1.20138	0	510.202	0	2472.28	3146.05	2000.01	2284.34	4.60925	379.449	249.792	1302.71	1204.65	64.8932	222.135	15.3399	247.936	900.47	125.669	167.596	Actin
NonamEVm020626t1	227.46	6.35	2.19136	8.57e-06	0.00152	0	0	5.78817	128.948	71.0159	0	21.5749	461.854	155.62	9.03947	1735.68	914.812	3.64987	700.91	628.8	124.759	0	0	8.97985	8.70388	0	23.9573	NA
NonamEVm020885t1	111.65	16.23	2.68731	2.27e-10	1.16e-07	0	0	0	0	15.3977	11.9457	89.026	3.43147	11.1273	26.4787	0	7.52943	698.827	9.28982	14.4894	0	0	1379.52	185.127	0	0	4.15214	NA
NonamEVm021307t1	118.08	-4.97	1.89885	3.7e-05	0.00489	3.55867	1.18303	23.196	2.49377	1.54898	0	2.08433	0	0	0	0	1.99482	0	0	0	1506.67	249.69	449.239	221.753	8.81824	104.285	21.3096	NA
NonamEVm021671t1	536.38	5.78	1.2967	1.5e-07	4.42e-05	7.1243	14.1655	23.2689	36.0946	1568.53	39.8678	706.955	1255.91	3277.31	1765.8	37.9162	139.947	138.631	865.299	1603.1	156.514	5.84879	99.5471	37.3595	7.62439	0	13.518	NA
NonamEVm022556t1	46.19	17.76	3.16456	2.8e-09	1.21e-06	0	0	0	0	0.934551	5.84914	1.25185	0	0	2.64464	159.901	2.03513	399.667	0	0	126.05	265.561	48.7397	3.54382	0	0	0	NA
NonamEVm022872t1	62.45	7.26	2.94346	1.21e-05	0.00199	0	0	0	0	11.9719	0	160.925	237.35	331.517	310.975	0	0.585036	82.1155	95.6272	97.6421	0	0	25.6766	11.542	5.6836	0	2.18267	NA
NonamEVm023235t1	636.25	8.3	2.10958	1.02e-07	3.26e-05	0	5.88395	4.30192	0	17.6016	13.5271	2.8954	433.878	47.4362	0	10351.8	1478.04	174.848	217.529	485.883	281.138	362.107	90.5788	1.40525	25.4992	0	3.25818	NA
NonamEVm023299t1	58.45	4.61	1.50093	2.41e-05	0.00358	7.10247	1.1778	0	18.6258	84.9807	23.7843	299.998	36.8337	46.0516	308.497	185.498	33.8823	140.778	18.0321	68.2746	0	0	6.18656	0	0	0	6.26186	NA
NonamEVm023393t1	400.37	6.27	2.37406	1.43e-05	0.00225	0	0	5.79502	54.6091	120.311	0	1026.7	436.133	1177.17	984.665	0	352.833	699.622	1890.76	510.715	0	0	309.406	429.232	492.045	74.4841	243.766	NA
NonamEVm023445t1	520.14	8.95	2.34513	1.49e-07	4.42e-05	0	0	0	113.15	99.7984	0	462.827	546.405	525.016	266.667	1.59389	543.843	452.127	546.76	607.166	125.076	0	24.8898	839.749	3190.45	110.806	2986.79	NA
NonamEVm023520t1	698.3	20.07	2.03543	1.45e-23	6.7e-20	0	0	0	96.7266	0	0	151.259	268.762	108.1	129.106	50.0678	211.214	175.029	290.919	278.829	308.419	0	0	1429.52	3205.51	1919.1	6740.1	NA
NonamEVm023956t1	24.07	5.74	2.62605	3.96e-05	0.00507	0	0	0	0	21.8707	21.9111	104.036	138.262	50.0845	21.3162	118.782	0	4.09761	15.0985	20.8859	0	0	0	13.127	0	0	0	NA
NonamEVm024114t1	90.55	7.1	2.4697	5.63e-06	0.00113	0	0	0	0	669.388	184.125	105.699	133.91	251.669	206.571	0	112.583	27.9479	62.7441	228.658	0	0	0	3.45409	2.17708	0	3.14504	NA
NonamEVm024366t1	178.15	-19.62	3.37276	9.83e-10	4.85e-07	23.2041	5.92994	0	97.5077	0	1.98157	0	0	0	0	0	0	412.536	0	0.431449	1557.45	989.896	686.634	51.1024	92.6491	0	0	NA
NonamEVm024727t1	40.94	19.29	2.14953	7.42e-20	2e-16	0	0	0	0	40.5996	0	91.3981	29.3826	179.345	79.3515	3.58265	61.861	52.314	210.548	73.6461	0	0	0	62.1048	0	0	16.5981	NA
NonamEVm025444t1	39.4	19.19	2.20916	9.87e-19	1.52e-15	0	0	0	0	4.55377	0	54.1586	55.3356	102.202	122.224	0	51.0877	98.9807	187.297	66.6038	0	0	0	61.3435	57.6157	0	5.30441	NA
NonamEVm025551t1	2799.18	16.11	6.8731	8.94e-06	0.00156	0	0	0	9.96362	0	0	0	0.986172	0	0	653.454	0	55574.9	0	0	1770.32	2857.67	669.318	38.8996	0	0	6.29501	NA
NonamEVm025938t1	69.43	6.54	2.96468	2.55e-05	0.00371	0	0	0	31.038	2.46154	0	238.506	187.224	222.408	229.191	0	30.9711	37.3499	190.984	38.3401	0	0	62.0017	79.4181	158.758	0	18.7024	NA
NonamEVm026485t1	25.56	18.12	3.56662	3.12e-08	1.13e-05	0	0	0	270.677	26.3332	0	2.05402	2.96217	0	0	241.963	4.55164	0	0	3.42193	0	0	6.0184	0	0	0	4.27515	NA
NonamEVm027079t1	150.78	8.02	2.58941	2.22e-06	0.000486	0	0	0	0	345.828	0	172.672	213.653	662.991	120.087	0	192.829	78.2473	497.403	450.753	109.412	0	105.716	64.9109	158.706	85.9052	58.0727	Actin
NonamEVm029093t1	44.1	19.14	2.07289	7.11e-21	2.46e-17	0	0	0	1.24082	37.824	0	73.9207	89.6334	114.168	52.2613	0	85.0409	71.0061	303.406	57.8999	0	0	0	53.1418	10.8668	0	19.7269	NA
NonamEVm029789t1	189.61	6.73	2.82544	1.75e-05	0.00271	0	0	1.46788	33.14	56.1327	0	386.051	133.722	494.517	521.521	0.396794	130.212	294.16	722.752	233.224	0	0	489.763	219.975	378.584	0	75.7742	NA
NonamEVm030849t1	291.55	8.61	2.34713	2.8e-07	8.07e-05	0	2.35001	1.4429	7.43164	4.61148	33.4558	0.414317	275.321	28.8278	4.52974	5283.06	276.38	21.1069	127.524	267.657	77.9211	0	0	0	0	0	2.09905	NA
NonamEVm030961t1	44.28	5.53	2.78928	5.8e-05	0.00697	0	0	0	4.96204	34.7427	0	48.5749	78.859	163.656	99.3586	0	41.2753	48.2582	218.131	91.9554	0	0	0	41.409	71.724	0	31.1587	NA
NonamEVm031712t1	65.1	6.44	2.22422	8.07e-06	0.00147	0	0	0	13.6852	9.55189	0	106.619	92.5959	186.663	72.9528	0	88.7944	70.4411	413.739	85.6343	15.6423	0	37.3948	53.855	83.673	79.193	21.743	NA
NonamEVm032391t1	310.24	-4.05	1.28317	3.1e-05	0.00437	3121.01	2016.87	373.32	309.12	12.2963	208.461	7.0245	7.4085	15.7031	46.1152	178.403	12.7718	14.8199	4.67959	12.4212	46.7042	0	97.3274	106.394	80.0083	85.4325	69.0834	NA
NonamEVm036410t1	69.11	5.88	2.81765	4.16e-05	0.00528	0	0	0	0	150.016	3.95454	96.3764	117.096	249.721	49.875	0	223.355	37.6006	156.171	191.872	0	96.8133	0	26.3365	70.9823	0	50.3041	Actin, cytoskeletal 2A
NonamEVm043137t1	67.46	18.46	2.69458	1.76e-12	1.21e-09	0	0	0	0	6.15085	5.9347	1.24485	0	1.51661	5.16936	198.871	3.91863	662.46	2.32483	0.852659	0	0	524.857	60.1452	3.26704	0	7.30408	NA
NonamEVm043697t1	57.87	5.52	2.28816	3.33e-05	0.00461	0	0	0	14.8277	10.4354	1.95603	66.1071	66.3949	92.9724	53.065	4.78527	68.2215	141.226	315.727	72.9836	0	0	36.6378	173.145	116.759	0	37.9244	NA
NonamEVm044792t1	44.21	18.56	2.09394	2.22e-19	4.38e-16	0	0	0	0	11.862	0	267.303	68.0505	56.4651	45.5224	1.54955	51.2217	29.1713	249.075	98.6541	0	0	35.2949	18.1864	1.196	0	39.1596	NA

## Sheet: S1vS4
transcript_id	baseMean	log2FoldChange	lfcSE	pvalue	padj	S1_1	S1_2	S1_4	S2_1	S2_2	S2_3	S2_4	S3_1	S3_2	S3_3	S3_4	S4_1	S4_2	S4_3	S4_4	S5_1	S5_2	S5_3	S5_4	S6_1	S6_2	S6_4	gene_name
NonamEVm000070t1	10321.2	9.21	1.776	4.89e-11	2.71e-08	0	48.4858	5.8357	3.74101	55021.6	1237.8	5304.52	24645.3	29888.9	4707.8	158.081	36464.3	1806.54	16474.4	48826.1	172.451	1878.56	218.902	38.7215	40.2581	88.4498	35.2104	NA
NonamEVm000120t1	842.4	4.34	1.79874	0.000215	0.00747	5.35758	34.3005	7.29461	11.2248	870.435	98.1685	5735.67	862.481	1782.25	3823.14	13.1764	1736.03	164.465	671.963	1470.1	956.494	0	75.033	131.436	0	70.3168	13.4747	NA
NonamEVm000181t1	16753.3	2.66	0.980137	0.000267	0.00891	493.699	930.671	2064.26	652.06	3626.87	618.589	1115.06	4545.61	6126.24	1354.05	4444.16	22857	5786.75	4788.81	6542.99	119885	88097.9	13023.2	23059.4	21288.7	11126	26146.3	Collagen alpha-1(V) chain
NonamEVm000240t1	80.08	5.17	2.33879	0.000139	0.0054	0	0	1.27482	0	43.9939	0	53.9303	118.07	41.2988	22.4154	0.730104	404.7	13.9525	22.8203	63.2881	596.899	368.31	0	7.52576	0	0	2.61976	Chitinase-3-like protein 1
NonamEVm000247t1	388.7	3.73	0.972598	1.44e-05	0.000904	32.5385	47.2558	6.15068	15.1658	645.635	86.1415	392.291	240.728	380.741	259.173	176.425	381.295	1218.24	142.395	362.804	1650.59	203.362	1261.07	679.818	122.071	59.8328	187.696	Chitin synthase chs-2
NonamEVm000275t1	248.26	4.14	1.1123	1.66e-05	0.00101	23.1718	33.0588	36.4001	89.6367	207.498	111.931	257.147	191.164	129.069	100.12	460.082	594.567	2446.29	63.8618	349.537	172.179	0	168.432	27.6318	0	0	0	NA
NonamEVm000304t1	1269.72	-3.09	0.890249	4.71e-05	0.00231	7975.14	3884.01	3306.14	1891.64	250.343	1294.07	498.768	195.776	355.687	603.9	2593.38	380.587	604.968	490.497	366.617	1480.01	252.213	236.979	660.094	273.732	215.354	123.956	Murinoglobulin-1
NonamEVm000477t1	292.96	-5.07	1.07734	2.01e-07	3.2e-05	1908.77	1673.87	377.077	709.495	126.072	825.571	42.5038	48.0168	107.272	114.288	249.493	19.4798	33.6223	29.0165	14.0617	0	0	24.9552	62.838	43.4681	0	35.1877	Receptor-type tyrosine-protein phosphatase zeta
NonamEVm000493t1	209.78	21.72	3.01631	1.38e-13	1.13e-10	0	0	0	0	0	0	149.444	599.076	132.484	26.4536	0	247.65	912.274	567.384	574.066	0	0	753.878	333.29	117.369	0	201.896	Myosin heavy chain, muscle
NonamEVm000498t1	866.78	2.46	0.74518	7.89e-05	0.00345	103.296	314.778	90.0568	458.519	968.123	641.967	1014.82	695.619	676.601	897.679	749.184	753.408	2460.52	459.852	780.666	1012.01	1663.44	3462.09	1125.13	196.451	111.335	433.69	Chitotriosidase-1
NonamEVm000501t1	779.33	-7.42	1.73031	5.43e-08	1.09e-05	5381.34	2988.11	1855.61	2502.65	11.4685	175.931	37.2713	3.44305	11.8092	31.0958	4045.42	2.65494	5.55773	12.5243	5.07495	0	0	31.609	4.86691	8.18227	0	30.5885	Hemocytin
NonamEVm000525t1	404.24	-4.54	1.20498	1.11e-05	0.000765	4885.77	380.683	368.663	1751.56	66.5126	301.959	105.655	41.7775	65.1316	112.41	172.674	53.3089	39.5898	62.011	26.4544	0	0	241.013	123.174	31.6746	51.7993	11.5449	NA
NonamEVm000723t1	5165.69	2.49	0.70422	4.19e-05	0.00211	907.401	862.295	1215.91	2564.77	5954.88	1546.3	4684.63	5172.4	5912.78	4787.59	3617.36	6737.92	7489.9	5580.46	6451.95	20132.8	1134.67	11857.4	6811.88	3295.32	3175.45	3751.09	NA
NonamEVm000784t1	2544.69	2.77	1.03397	0.000282	0.0093	39.729	141.291	403.05	64.8058	957.167	201.391	294.995	666.529	1467.17	395.644	778.394	3845.82	933.732	1127.44	1551.59	16686.8	12233.7	2517.78	2888.89	2060.39	2378.93	4347.89	Collagen alpha-1(IX) chain
NonamEVm000818t1	915.94	3.56	0.806155	1.82e-06	0.000178	64.1895	240.907	59.7212	197.992	1658.33	506.059	507.343	834.603	1154.04	635.526	1905.21	2269.03	1754.43	1346.67	1812.73	970.647	112.601	1654.33	1610.01	281.514	437.09	137.646	NA
NonamEVm000853t1	118.12	-4.88	1.42228	2.13e-05	0.00124	907.736	225.686	150.955	367.623	22.2494	87.8792	15.5695	14.9346	38.1742	20.1358	6.95334	2.00355	0	11.0116	12.7533	169.511	42.4676	141.741	3.74332	14.3252	343.252	0	NA
NonamEVm000926t1	74.62	5.96	1.61653	3.65e-06	0.000314	0	2.35876	0	12.4356	124.14	3.98899	193.15	84.7701	86.9972	192.401	270.155	106.677	337.867	12.1877	207.916	0	0	0	3.45262	0	0	3.10897	Phenoloxidase-activating factor 2
NonamEVm000985t1	270.74	5.98	1.38258	3.74e-07	5.07e-05	6.26545	4.15029	6.26586	7.29373	357.168	10.3243	1233.56	158.378	232.524	456.574	10.1181	1254.78	1327.5	58.6858	587.395	0	178.533	42.9632	22.5839	1.274	0	0	Chorion peroxidase
NonamEVm001030t1	187.15	-3.45	1.07339	8.04e-05	0.00351	1060.17	676.848	280.451	661.807	86.3965	291.595	70.3876	45.1944	87.2876	200.1	215.759	23.3382	61.898	38.6959	44.5659	0	0	164.401	27.7827	14.4429	26.844	39.3487	NF-X1-type zinc finger protein NFXL1
NonamEVm001080t1	209.01	-4.19	1.32085	6.14e-05	0.00284	1351.83	1281.46	315.669	659.427	56.7058	85.8272	38.734	13.2345	25.3006	92.3605	393.433	17.8294	45.9376	19.1586	30.2614	0	0	18.6888	93.9445	29.3557	0	29.0204	Hemocytin
NonamEVm001122t1	396.91	10.92	2.70059	8.79e-09	2.61e-06	0	0	0	0	787.296	18.6269	303.447	422.714	461.016	97.6132	3.72578	5912.58	52.1736	190.023	482.813	0	0	0	0	0	0	0	NA
NonamEVm001194t1	114.59	2.86	1.0676	0.000276	0.00915	10.8552	49.2824	30.2559	49.1771	172.191	103.936	189.037	45.9214	53.8472	111.063	58.7863	129.988	998.567	51.3042	84.4043	81.3621	94.7325	58.2885	127.611	4.52546	0	15.8053	NA
NonamEVm001273t1	251.75	4.77	1.94595	0.000144	0.00556	1.75455	6.13168	1.43276	0	558.458	8.888	1005.78	413.29	640.352	1160.21	13.2545	556.058	9.73515	256.599	578.052	281.61	0	0	20.0094	19.7092	0	7.16355	Chorion peroxidase
NonamEVm001289t1	923.1	-3.08	0.697705	1.98e-06	0.000187	5720.02	3556.8	813.68	2752.62	468.388	845.489	847.692	409.329	469.194	741.575	940.273	340.077	259.524	397.017	368.427	111.777	169.832	245.471	460.151	90.2216	144.23	156.333	NA
NonamEVm001377t1	32.39	-5.27	1.50283	1.27e-05	0.000832	111.67	121.733	121.174	118.642	2.366	80.9903	6.88372	17.5903	2.72007	3.9692	119.604	4.06342	0	0	0.654794	0	0	0	0.530678	0	0	0	Scavenger receptor class A member 5
NonamEVm001405t1	69.76	17.62	3.36545	2.9e-09	1.02e-06	0	0	0	0	48.0261	0	524.361	110.985	472.496	241.974	0	9.16048	0	76.3117	44.1805	0	0	0	4.08886	0	0	3.07058	Myosin heavy chain, muscle
NonamEVm001464t1	46.91	5.65	2.10621	4.63e-05	0.00228	0	0	1.46047	3.74688	155.002	13.8258	110.718	33.8759	38.4081	46.8912	0.400055	11.3247	492.373	5.24349	48.9716	0	0	43.7907	14.5576	0	0	11.4367	NA
NonamEVm001501t1	223.35	7.82	1.58375	1.38e-09	5.54e-07	1.7834	0	2.91333	4.98304	118.339	0	226.014	76.5046	230.755	169.113	223.04	331.682	2633.56	98.6891	396.091	62.6534	106.244	149.737	22.1281	3.26509	52.11	4.14904	Phenoloxidase-activating factor 2
NonamEVm001562t1	206.47	4.17	1.10318	1.36e-05	0.000871	12.3978	12.9072	23.1449	58.1505	985.682	17.8633	320.205	232.355	398.181	430.28	103.169	645.062	358.731	249.537	588.299	0	0	61.9475	27.4763	10.8117	0	6.18393	A disintegrin and metalloproteinase with thrombospondin motifs like
NonamEVm001597t1	197.7	6.39	1.29409	1.35e-08	3.7e-06	0	0	5.07392	6.28185	19.6132	19.1192	86.6289	128.607	103.487	129.654	11.71	297.67	223.467	444.563	256.845	95.5831	0	188.002	284.105	1067.17	391.339	590.48	NA
NonamEVm001725t1	29.39	17.94	2.93075	5.18e-11	2.79e-08	0	0	0	0	0	0	161.427	148.562	80.4253	13.5992	0	6.8754	24.6428	52.3947	49.024	0	0	87.3018	2.0779	8.72273	0	11.4435	Myosin-4
NonamEVm001930t1	2714.87	-6.61	1.27318	2.66e-09	9.72e-07	31878.1	16320.6	982.286	3819.27	97.3249	755.116	80.2859	39.3555	89.2457	480.825	2932.69	76.1818	92.2058	124.842	39.8189	477.291	129.262	627.805	250.396	18.7836	48.3295	367.118	Phenoloxidase 2
NonamEVm001996t1	6309.13	-5.04	1.20669	1.94e-06	0.000185	637.033	123.104	30750.2	3223.84	319.435	1806.14	50.4872	62.3233	129.833	129.357	218.147	421.101	148.286	48.3764	74.8733	9267.49	51427.1	17368.7	3673.33	3534.72	4891.65	10495.3	Phosphoenolpyruvate carboxykinase [GTP]
NonamEVm001997t1	5392.31	-5.49	1.31953	1.3e-06	0.000136	2101.75	82.6964	60896.2	11063.7	62.7746	279.987	253.706	158.575	116.421	297.121	489.443	592.824	54.4128	128.691	106.164	3480.96	4185.19	6174.04	1690.3	3126.56	9707.74	13581.7	Phosphoenolpyruvate carboxykinase [GTP], mitochondrial
NonamEVm002186t1	45.48	-3.32	1.13833	0.000154	0.00581	317.64	171.908	51.0666	59.0709	20.7737	118.921	12.3368	7.6393	43.0892	64.394	71.4744	7.43904	18.6694	11.3741	9.85345	0	0	0	12.15	0	0	2.76964	NA
NonamEVm002258t1	403.25	-6.79	1.46342	2.97e-08	7.19e-06	3805.25	2405.21	372.585	361.659	8.96865	105.95	2.0308	3.11045	7.48968	21.3635	680.65	11.3192	6.47234	7.63266	6.66806	755.005	151.825	46.0407	63.8751	13.2737	0	35.1108	Glucose dehydrogenase [FAD, quinone]
NonamEVm002260t1	26.35	4.77	2.53138	0.000282	0.0093	0	0	0	0	231.577	12.0369	0.838858	8.40661	25.8339	0	6.43117	214.611	18.1425	2.92851	35.9264	0	0	18.7847	4.18081	0	0	0	Phenoloxidase-activating factor 2
NonamEVm002302t1	76.01	-5.02	1.53419	2.72e-05	0.00153	438.398	103.915	69.3509	242.624	7.44932	107.11	6.36618	5.14076	11.2786	15.5951	2.30922	0.759759	0.620075	3.77779	4.52774	290.316	0	113.794	14.0281	4.04371	230.91	0	NA
NonamEVm002384t1	48.69	4.79	2.3105	0.00023	0.00785	0	2.35717	0	0	47.1051	0	95.2544	17.1486	16.6852	124.587	130.66	19.7838	567.268	8.70475	34.0777	0	0	0	7.5948	0	0	0	NA
NonamEVm002394t1	25.36	19.16	2.09074	1.5e-20	2.57e-17	0	0	0	1.30381	14.7203	0	65.7463	49.6762	69.5942	13.8667	0	41.3446	45.8905	70.0256	71.1837	0	0	0	84.5693	14.8386	0	15.2621	NA
NonamEVm002504t1	469.22	5.11	1.31534	4.92e-06	0.000401	0	8.44316	27.0509	200.659	1779.02	33.1362	1063.3	288.632	338.231	626.291	404.605	766.455	1646.06	110.299	903.959	757.22	0	843.193	491.403	7.78674	0	27.1689	NA
NonamEVm002509t1	401.7	-3.63	1.36884	0.000223	0.00768	52.6597	23.1004	90.9621	135.788	2.79475	14.8018	35.0184	2.82935	1.25158	22.3678	2.30067	2.29783	1.12544	0	5.97443	5919.64	373.897	895.494	617.682	61.5454	158.55	417.385	NA
NonamEVm002564t1	227.7	-5.8	1.24632	1.14e-07	2.01e-05	1644.36	951.171	409.322	530.906	40.957	381.261	30.672	11.5753	22.6817	39.8264	559.068	7.92157	10.2912	9.35979	8.8156	117.566	0	84.6229	82.8107	18.556	0	47.7247	NA
NonamEVm002687t1	1448.33	2.63	0.994205	0.000308	0.00992	64.8234	57.2476	69.1338	61.6226	270.168	53.2877	78.0484	108.721	208.407	64.5869	71.2749	491.921	1121.87	158.025	389.739	16486.4	666.565	7682.54	3219.41	133.954	236.921	168.603	UDP-N-acetylhexosamine pyrophosphorylase
NonamEVm002701t1	210.93	5.38	2.14679	7.81e-05	0.00343	0	3.57628	0	1.25694	4.21178	12.0888	2.10367	147.533	8.18182	0	3298.38	874.051	51.4929	48.8588	188.048	0	0	0	0.698247	0	0	0	Endochitinase
NonamEVm002801t1	28.47	-4.55	2.20543	0.000289	0.00945	278.531	48.7293	42.3162	90.9675	0	21.4361	1.1799	17.0378	7.18013	9.96571	1.88631	2.38038	0	1.32255	0	103.463	0	0	0	0	0	0	NA
NonamEVm002886t1	73.51	3.58	1.26403	0.000164	0.00607	1.45852	6.57089	9.53083	15.2814	352.834	15.5575	55.0304	87.5335	173.11	109.722	61.416	127.951	83.7447	100.029	171.614	156.81	0	27.7465	10.0027	7.26665	30.2415	13.8567	Sterile alpha motif domain-containing protein 11
NonamEVm002903t1	84.46	-4.52	1.20953	1.26e-05	0.000832	449.159	348.465	60.3258	274.217	30.4949	315.688	36.1894	3.65384	38.7043	18.1878	131.177	9.761	6.81403	8.68908	2.76741	82.5383	0	0	17.5686	10.5308	0	13.2823	Glutamate receptor ionotropic, delta-2
NonamEVm003035t1	50.03	4.06	1.42204	0.000125	0.00496	7.12219	2.35963	2.90824	4.976	93.9932	9.97213	92.0261	59.3292	92.6089	62.0195	7.17634	99.5253	342.719	25.553	85.6889	0	0	99.5972	11.0554	0	0	2.07481	NA
NonamEVm003270t1	119.01	-6.62	1.34931	1.07e-08	3.02e-06	1020.68	509.975	91.638	161.81	16.0363	458.67	3.33296	5.39938	11.6491	29.7474	166.805	3.90881	4.55809	0.581375	0.85346	0	46.8669	31.1212	15.9087	5.44446	0	33.2546	NA
NonamEVm003308t1	2157.4	2.73	0.916256	0.000157	0.0059	206.203	352.247	228.448	289.421	3145.7	690.51	4298.85	1937.77	1601.66	3669.55	884.93	2307.48	2667.23	1046.15	3033	10668.2	1347.02	5540.12	2242.87	256.475	460.844	588.125	Chitin deacetylase 1
NonamEVm003315t1	53.1	-3.76	1.07983	3.77e-05	0.00199	366.565	232.26	33.4041	135.73	18.6006	117.51	14.6451	5.22299	45.761	41.2116	58.3538	6.72295	8.93829	13.265	12.5437	0	0	23.88	31.0103	0	0	2.5463	NA
NonamEVm003334t1	180.12	-5.65	1.06099	4.98e-09	1.65e-06	848.705	1304.53	185.944	247.517	38.1727	801.301	85.2688	10.3732	48.7013	69.4391	82.4908	5.87873	8.76914	13.1034	10.4675	95.5599	0	19.7435	54.8089	11.2574	0	20.6896	NA
NonamEVm003435t1	53.12	-5.05	1.29481	4.95e-06	0.000402	272.014	144.959	79.8338	59.6438	12.3174	399.736	3.74292	13.7318	8.09348	18.735	97.6583	2.23313	3.18984	0.580861	3.83658	0	0	0	8.29242	13.0564	0	27.0236	NA
NonamEVm003504t1	34.16	4.18	1.40503	9.25e-05	0.00388	0	1.84602	2.27678	33.027	146.142	3.08511	60.8316	43.337	97.1681	39.4683	4.32541	59.938	24.4899	101.683	41.3764	0	0	29.2694	31.6677	21.9235	0	9.66198	Helix-loop-helix protein delilah
NonamEVm003521t1	198.27	-3.46	0.984291	3.89e-05	0.00204	309.148	420.796	138.897	91.5494	77.3065	350.065	34.5137	44.0408	44.9367	73.152	225.218	22.3387	25.3496	11.9067	16.6448	701.773	1148.73	90.93	45.194	64.4938	141.204	283.687	Uncharacterized peptidase C1-like protein F26E4.3
NonamEVm003635t1	63.21	-3.53	0.969753	2.73e-05	0.00153	252.665	244.675	71.4778	131.69	38.8588	172.988	45.4989	17.8937	36.265	68.7254	63.0104	9.57482	7.67624	16.4788	14.2187	140.06	0	36.3038	18.4444	0	0	4.08309	Probable G-protein coupled receptor Mth-like 1
NonamEVm003641t1	6110.21	5.47	1.57426	1.13e-05	0.00077	128.187	118.59	145.883	4.89892	33853	2975.59	7207.12	8842.59	9259.02	5315.1	759.443	41135.5	51.823	3904.16	20069.3	34.938	486.294	0	60.6693	56.3349	0	16.1904	NA
NonamEVm003665t1	69.37	4.19	1.45496	0.00011	0.00449	0	0	7.03778	36.8404	1.79046	0	25.3981	35.8138	27.4446	19.3193	2.95323	43.2222	116.869	133.883	76.6356	0	92.7825	6.57768	158.617	102.199	399.606	239.073	NA
NonamEVm003761t1	453.62	-5.29	1.16036	3.06e-07	4.35e-05	3140	2525.11	322.741	698.371	104.917	751.834	54.1776	46.8144	126.792	134.519	859.411	34.2756	29.1506	26.8789	23.5672	667.357	0	101.868	129.789	14.9165	63.7917	123.448	NA
NonamEVm003776t1	104.04	-3.56	1.09288	6.95e-05	0.0031	665.751	453.427	295.419	262.036	60.2477	203.496	31.3438	13.7158	20.027	44.4436	116.396	24.9051	38.1996	4.26213	39.6957	0	0	0	13.6907	0	0	1.77442	NA
NonamEVm003797t1	4519.04	3.55	0.779748	1.05e-06	0.000114	236.719	272.442	512.273	983.699	4395.85	1042.66	684.391	7453.41	3509.34	1294.72	772.412	5483.29	6165.57	5192.89	2722.26	1641.82	4491.2	4083.81	6754.34	22018	12590.9	7116.96	Tubulin alpha chain
NonamEVm003839t1	508.06	-3.58	1.18983	0.000117	0.00471	4152.15	2666.07	393.459	752.222	235.24	970.323	126.337	62.0389	186.886	193.332	537.573	125.347	131.278	109.146	134.263	0	0	25.327	211.659	39.834	105.867	18.9981	EH domain-containing protein 2
NonamEVm003872t1	24.31	-5.07	1.53336	2.44e-05	0.00139	108.468	121.411	95.8154	96.9389	1.53998	5.96687	4.15953	0.981075	4.0476	1.93855	86.9152	3.07143	0.45582	0	1.27915	0	0	0	0.691197	0	0	1.03969	Enteropeptidase
NonamEVm003983t1	3354.37	5.6	1.36141	1.35e-06	0.000141	94.6162	73.4533	82.6555	7.8264	19569.5	1654.41	4203.62	3332.76	4404.51	2573.32	776.59	21533	71.5964	2031.58	12607.3	262.487	220.528	85.8595	37.6345	135.775	0	37.1012	NA
NonamEVm004012t1	43.5	-5.27	1.704	3.2e-05	0.00175	266.735	85.1748	50.6464	181.467	3.86502	14.2249	10.5531	11.4537	15.7286	8.58739	2.055	0.982239	0	0	3.28659	0	54.2607	57.6336	3.23225	0	187.011	0	NA
NonamEVm004013t1	145	-3.3	0.973013	5.42e-05	0.00258	682.702	253.565	100.913	119.054	103.317	295.721	69.3865	28.2163	47.9214	28.1389	73.323	22.8147	15.5069	36.9418	27.7155	802.19	390.33	32.3262	45.8981	4.42518	0	9.68165	Synaptic vesicle membrane protein VAT-1 homolog-like
NonamEVm004033t1	31.29	-5.21	1.49969	1.42e-05	0.000897	247.356	130.91	18.8904	43.5227	2.15673	1.99204	13.7352	0	3.54219	16.1531	60.6027	4.4638	0.910917	0	0	0	0	0	3.45546	42.4313	45.2302	52.9616	Acid sphingomyelinase-like phosphodiesterase 3b
NonamEVm004119t1	325.73	-6.14	1.52942	1.01e-06	0.000111	3324.89	1855.27	164.496	205.515	22.7663	154.377	7.28292	0	3.98494	6.21926	838.905	6.79181	15.9136	6.53072	7.78507	77.8247	321.954	46.3182	40.6957	13.5592	0	44.98	Agrin
NonamEVm004275t1	113.48	-5.12	1.23506	1.96e-06	0.000186	832.726	877.087	142.445	211.414	10.3681	102.974	15.9199	7.62432	24.6739	17.6473	185.732	3.69828	12.3876	9.59479	11.4987	0	0	0	30.7332	0	0	0	NA
NonamEVm004304t1	732.78	23.62	2.20205	1.8e-27	3.1e-23	0	0	0	3.86898	3.99496	0	732.731	2548.73	619.526	279.668	1.86817	854.282	2931.45	1492.5	1583.03	0	271.543	1180.43	1134.39	646.008	0	1837.26	Myosin heavy chain, striated muscle
NonamEVm004386t1	37.28	-3.74	1.15835	6.91e-05	0.00309	122.783	228.768	100.267	94.4949	16.6342	53.7998	14.5663	13.236	8.59999	56.1911	28.2982	11.1519	3.18608	9.29009	4.6882	0	0	0	32.468	19.5745	0	2.07521	NA
NonamEVm004407t1	937.14	4.09	0.899483	8.46e-07	9.61e-05	31.3872	11.9829	31.1138	112.399	161.955	26.8455	220.32	207.961	285.359	194.589	38.7792	654.488	546.384	681.408	398.794	405.71	35.0403	883.02	2453.72	5728.88	3569.59	3937.37	Alpha-crystallin A chain
NonamEVm004420t1	107.58	-8.17	3.36148	9.68e-06	0.000697	644.922	367.739	287.523	303.284	0.328481	52.2889	4.78727	2.61925	2.52745	0	614.738	0	0	0.5215	0	84.102	0	0	1.47608	0	0	0	NA
NonamEVm004475t1	60.96	4.39	2.0802	0.000311	0.00997	0	1.1161	1.37465	0	180.108	1.88346	201.142	21.3637	45.9878	59.9561	0	197.067	34.0909	9.35129	98.0981	192.379	115.921	140.804	40.5735	0	0	0	All trans-polyprenyl-diphosphate synthase PDSS1
NonamEVm004509t1	174.8	-6.28	1.89135	6.93e-06	0.000528	1213.6	464.242	642.997	486.491	23.0455	401.986	2.16479	0	6.2817	8.31801	496.816	5.55925	0	3.95745	0	0	0	72.5187	3.25779	9.4204	0	4.92165	Phenoloxidase-activating factor 2
NonamEVm004528t1	37.56	3.27	1.26395	0.000292	0.0095	1.7809	1.17983	7.27296	99.5235	130.341	17.9642	62.8834	49.9849	66.2751	129.792	15.9413	84.6612	20.9152	58.0424	55.8221	0	0	0	8.97789	9.78274	0	5.1802	Silk gland factor 3
NonamEVm004621t1	354.28	-2.23	0.762533	0.000187	0.00669	1359.95	665.541	412.888	247.386	201.996	1121.6	149.073	167.867	170.071	189.017	312.182	195.412	134.99	110.334	129.176	334.663	487.142	170.771	208.595	273.153	376.387	375.99	Actin-related protein 2/3 complex subunit 1A-B
NonamEVm004698t1	51.4	-5.11	1.28189	3.58e-06	0.000311	388.418	219.261	62.1763	75.5931	13.1061	134.485	3.73092	2.2037	10.2208	16.911	92.473	5.02388	3.07524	2.61008	2.19213	0	0	0	16.584	44.0098	0	38.6974	Innexin inx3
NonamEVm004736t1	4293.82	5.28	1.30049	2.31e-06	0.000213	5.34415	0	161.467	479.225	313.331	1.99443	1142	2377.64	2413.91	1548.14	128.495	3829.55	4561.45	5626.43	3802.56	2864.33	225.623	5316.05	13612.1	20764.6	7173.85	18115.9	NA
NonamEVm004740t1	130.68	-4.63	1.27677	1.55e-05	0.000962	319.57	515.801	227.176	202.528	1.86428	1486.11	46.8536	7.41477	3.06127	13.6775	20.4352	16.283	5.47876	5.8548	2.06823	0	0	0	0.6966	0	0	0	Phenoloxidase-activating factor 3
NonamEVm004793t1	71.5	3.81	1.00707	1.59e-05	0.000981	5.25735	7.05602	10.8576	104.853	137.255	35.0108	102.874	92.6444	113.502	98.6522	18.1105	105.959	299.058	133.819	90.2693	30.8333	0	42.7247	82.9471	20.1593	0	41.2378	NA
NonamEVm004906t1	62.25	-26.95	3.23272	1.08e-17	1.24e-14	447.755	266.644	177.289	118.945	1.0547	39.6455	2.37178	0	0	0	311.061	0	0	0	0	0	0	0	0	0	0	4.77112	Tenascin-N
NonamEVm004927t1	111.83	-4.73	1.75447	0.000103	0.00425	226.182	220.669	303.989	73.4109	17.2608	1191.08	13.7444	13.7304	19.2331	0	106.064	5.85449	1.36544	4.64645	0	187.742	0	43.5884	21.4222	0	0	10.3737	NA
NonamEVm005010t1	213.24	-3.42	1.24123	0.000202	0.00707	429.686	2191.91	106.586	455.794	30.9423	308.57	44.7609	35.5368	83.2087	164.689	58.7625	44.7964	24.6997	114.866	20.5628	181.711	150.031	144.739	75.9085	0	0	23.5653	NA
NonamEVm005104t1	178.76	-4.75	2.01998	0.000169	0.00621	0	14.6982	12.5272	15.2334	3.14695	0	4.67309	7.02253	0	0	0	0	0	0	0	926.011	241.83	2027.26	477.51	24.4861	170.839	7.4526	Glutamine synthetase
NonamEVm005115t1	1458.58	6.46	1.69861	1.37e-06	0.000141	10.7799	9.43666	8.00316	141.977	18.2978	31.9462	0	4.85547	8.32798	3.66501	17.3706	51.6962	10830.2	22.041	26.2606	7155.59	12726.7	643.184	170.573	101.23	0	106.604	NA
NonamEVm005119t1	56.88	17.04	3.29903	2.77e-09	9.94e-07	0	0	0	3.72971	0	0	0	0	0	0	0	4.7565	85.8657	2.32698	0	0	202.782	0	412.456	197.257	151.485	190.736	Histone-lysine N-methyltransferase SETMAR
NonamEVm005252t1	236.26	-4.97	1.98169	0.000114	0.00458	202.308	39.8949	526.426	348.059	1.26359	35.1586	0	0	0	0	14.3008	1.83739	3.19225	0	2.5621	0	0	21.5326	50.8921	913.31	1344.98	1691.89	NA
NonamEVm005411t1	38.99	-26.33	3.11694	4.62e-18	5.96e-15	229.561	184.345	49.67	86.2378	1.54204	17.8136	0.746199	0.440614	0	0	287.493	0	0	0	0	0	0	0	0	0	0	0	Plasma kallikrein
NonamEVm005455t1	86.7	-6.6	1.96526	4.31e-06	0.000359	811.257	425.853	229.454	185.315	0.616586	33.8016	1.66491	0	1.51964	2.58844	210.787	0.279844	0	1.74572	2.56189	0	0	0	0	0	0	0	NA
NonamEVm005463t1	949.49	-5.09	1.48686	1.82e-05	0.00109	2936.6	9100.14	1336.62	2179.87	55.3751	144.55	44.6331	18.5622	48.104	138.173	3836.31	83.5067	46.0627	58.9203	23.0956	425.171	55.4418	14.3768	119.512	22.7668	0	201.068	NA
NonamEVm005518t1	505.25	3.48	1.02508	5.21e-05	0.0025	9.05305	4.79858	16.2662	12.2007	52.7563	4.05717	36.7729	25.9599	27.8676	22.7112	63.717	38.6246	511.824	18.7676	63.8117	1589.07	4390.14	2486.62	1177.87	241.287	139.791	181.432	Glutaredoxin domain-containing cysteine-rich protein CG12206
NonamEVm005579t1	97.42	8.69	2.2818	7.8e-08	1.43e-05	0	0	0	38.8712	47.8015	11.0025	6.50596	70.2999	30.867	0	126.85	1432.2	4.41234	148.124	217.963	0	0	0	8.25257	0	0	0	NA
NonamEVm005605t1	40.7	5.77	1.60889	6.09e-06	0.00047	0	0	1.19664	2.04705	4.05647	1.64179	15.7551	25.6237	40.9345	7.43907	2.29555	49.4198	194.818	45.5959	27.701	0	0	15.3724	39.7808	269.486	80.0431	72.1293	Dual specificity protein phosphatase 19
NonamEVm005667t1	40.57	-5.59	1.91248	3.27e-05	0.00178	426.765	159.496	50.3472	119.224	4.24989	0	5.77799	0	1.21535	12.4031	56.3961	3.05502	0	0	0.965254	0	0	41.727	10.8185	0	0	0	Sterol O-acyltransferase 1
NonamEVm005749t1	281.09	-4.06	1.31946	8.19e-05	0.00356	2213.71	1116.17	642.353	331.448	63.4329	187.235	9.40464	34.1273	45.2925	54.3932	886.3	43.148	40.9832	46.683	39.6669	160.63	0	63.7833	90.9566	43.6324	0	70.6051	Endoribonuclease CG2145
NonamEVm005860t1	243.75	8.27	2.14236	9.76e-08	1.77e-05	0	2.20421	0	1.16169	117.776	0	22.1615	32.4596	129.572	28.6133	96.8348	57.8044	3897.37	75.316	59.2896	372.884	295.165	109.334	45.4663	0	19.0105	0	NA
NonamEVm005970t1	42.41	-5.44	1.5531	1.07e-05	0.000747	163.411	155.496	92.7806	79.4849	10.469	170.604	2.07804	0.49094	7.08412	15.5176	62.2193	3.07773	0.913436	0	0.426609	156.204	0	0	11.7587	0	0	1.04255	Innexin inx3
NonamEVm006040t1	49.84	-4.56	2.01827	0.000224	0.00768	327.179	160.783	105.28	125.246	4.21918	27.3118	1.41298	0	3.0108	11.1386	319.449	0	0.952231	0.494287	6.37445	0	0	0	0	0	0	3.54544	NA
NonamEVm006051t1	22.8	4.87	2.23494	0.000189	0.00672	0	0	0	0	16.0274	0	38.932	45.5575	69.8619	54.0675	0	33.0313	70.1921	53.4265	30.9392	0	0	40.1467	18.7855	14.2867	0	16.4426	NA
NonamEVm006216t1	127.41	-5.73	1.27088	2.36e-07	3.62e-05	1551.87	478.219	144.69	273.103	11.0779	104.333	7.02952	1.38396	12.3761	17.3834	122.899	4.01361	9.95141	7.75857	5.25644	0	0	25.5405	23.1058	0	0	2.93013	NA
NonamEVm006292t1	1234.5	2.33	0.770095	0.000148	0.00566	102.92	148.404	124.03	148.29	284.134	158.795	146.612	214.865	348.712	257.982	553.397	1025.83	929.215	533.326	575.395	9655.27	3445.88	1455.06	2355.68	1002.84	520.061	3172.4	Insulin-like growth factor-binding protein-related protein 1
NonamEVm006323t1	28.02	5.1	2.45797	0.000174	0.00635	0	0	0	0	0.307609	0	19.8995	130.351	20.7474	5.17949	0	49.7851	148.727	49.5203	55.5237	0	107.056	0	4.84979	10.9184	0	13.6488	Actin-57B
NonamEVm006471t1	882.88	5.04	1.9239	8.96e-05	0.00378	3.58714	4.75358	4.39439	11.2775	149.446	30.1392	0.419444	78.8527	61.1649	3.25334	16782.1	1123.55	22.9173	623.812	493.069	0	0	25.0846	1.39182	0	0	4.17859	NA
NonamEVm006491t1	1038.98	7.1	1.5859	3.96e-08	9.21e-06	0	7.66464	16.1629	1.15436	528.461	49.8808	1005.58	2953.51	1079.9	569.785	3346.95	7588.33	3.8262	993.834	3490.9	410.452	649.912	80.4884	18.6587	30.0808	0	32.0385	NA
NonamEVm006520t1	20.57	16.47	2.39791	2.51e-13	1.97e-10	0	0	0	0	22.1746	3.97072	23.2824	0	0	14.2246	335.447	6.15329	28.3071	2.32579	2.1331	0	0	12.3937	2.07503	0	0	0	NA
NonamEVm006547t1	28.72	-3.52	1.06164	6.09e-05	0.00282	302.264	110.919	15.8992	62.9207	10.8141	35.8374	12.9232	7.87305	13.1821	9.06442	11.9142	4.21025	2.73985	8.75712	18.3338	0	0	0	0	0	0	4.1815	NA
NonamEVm006582t1	40.24	5.35	2.36567	0.000111	0.00451	0	0	1.04917	0.897741	58.8518	4.31559	2.65835	15.2216	0.365282	19.8008	225.142	33.4999	509.516	4.97623	8.92486	0	0	0	0	0	0	0	NA
NonamEVm006618t1	35.2	-4.91	2.21508	0.000175	0.00635	121.917	153.355	0	47.628	3.97297	390.761	15.1005	0	3.45814	7.82517	24.9425	0	0	0	2.082	0	0	0	0	3.29546	0	0	NA
NonamEVm006676t1	44.98	-4.1	1.08326	1.4e-05	0.000886	311.257	155.614	92.9432	33.5605	11.7042	153.25	7.48851	14.7123	7.5887	9.04474	119.193	5.30207	10.4779	6.38934	5.96828	0	0	0	6.21933	14.1436	11.3027	13.5056	Angiopoietin-4
NonamEVm006700t1	10205.3	5.14	1.13177	3.93e-07	5.28e-05	171.454	174.953	363.724	999.691	54292.4	496.594	11331.5	29492.2	33884.3	25453.7	777.469	9405.34	2780.74	10189.7	35267.8	5561.46	737.704	742.454	1364.89	301.707	366.433	361.176	NA
NonamEVm006722t1	185.78	4.58	0.725633	4.39e-11	2.6e-08	14.2331	20.0449	15.9806	80.81	246.738	71.6971	133.16	429.038	349.588	329.451	410.574	593.559	450.352	206.749	727.21	0	0	0	6.90942	0	0	1.03824	Leukocyte elastase inhibitor A
NonamEVm006752t1	81.21	-3.73	1.05317	3.32e-05	0.0018	53.0135	171.261	54.4624	171.732	10.2091	339.155	29.012	5.63134	4.31995	26.7832	48.2871	7.84607	3.86477	0.456418	6.69749	200.848	215.336	253.436	101.039	10.1441	32.2542	40.817	NA
NonamEVm006823t1	677.13	7.49	1.75837	5.46e-08	1.09e-05	0	0	0	7.77369	1.6836	0	2.97358	37.8135	27.6536	10.3892	2.28551	234.353	182.665	119.97	71.9839	488.775	0	149.861	1102.48	4961.01	6207.51	1287.7	NA
NonamEVm006871t1	425.41	10.58	1.99933	1.07e-11	7.68e-09	0	0	0	16.1552	20.6595	3.95503	32.4281	226.641	43.612	33.078	719.85	284.293	2927.25	42.0156	300.379	1203.82	2798.63	401.232	69.4018	67.8065	146.893	21.005	NA
NonamEVm006879t1	96.92	2.97	1.11574	0.00028	0.00925	16.7519	16.3826	10.7601	4.60611	95.6742	33.1648	50.6432	52.9159	78.325	129.913	105.601	115.23	409.875	50.8426	102.959	246.184	185.922	138.019	212.358	8.48947	0	67.5833	NA
NonamEVm006966t1	114.22	-3.64	1.39049	0.000239	0.00811	1049.69	352.542	281.844	223.775	16.633	165.318	9.57068	25.0035	28.3289	3.22954	201.28	18.9631	23.6739	22.6465	29.4091	0	0	0	8.29027	15.2263	0	37.3671	NA
NonamEVm007057t1	917.05	-6.18	1.33337	7.32e-08	1.38e-05	9581.55	2939.86	386.501	850.426	38.1392	3984.91	24.2055	42.416	44.5378	151.098	1217.21	25.9344	25.0493	51.3147	6.51831	0	274.878	105.399	104.629	44.3032	66.8251	209.399	Agrin
NonamEVm007133t1	117.33	6.81	2.5348	1.55e-05	0.000962	0	0	0	0	55.4093	0	5.39512	91.0091	46.0722	2.5903	414.051	557.414	0.917533	108.374	293.071	858.387	84.9912	0	39.4978	0	0	24.1254	NA
NonamEVm007186t1	41.23	5.04	2.50615	0.000195	0.0069	0	0	0	0	1.55188	0	82.5089	68.1992	59.8339	15.0393	0	56.3435	122.027	39.4059	96.4261	306.388	0	5.13632	52.1262	0	0	2.16919	Myosin heavy chain, muscle
NonamEVm007234t1	47.28	-4.07	1.25512	5.67e-05	0.00266	152.209	391.961	44.3979	193.347	4.56144	20.3013	13.2756	6.34945	22.6908	38.245	78.0823	8.15871	2.10463	10.2063	5.91508	0	0	17.2807	27.3087	0	0	3.83732	Ficolin-1
NonamEVm007324t1	54.6	5.85	1.89224	1.84e-05	0.00111	0	0	1.38997	2.77586	0	0	3.25073	5.09926	8.7379	3.10196	0	25.3856	405.008	5.57983	54.1012	344.578	193.089	94.9474	27.2125	24.5172	0	2.33843	NA
NonamEVm007432t1	1039.4	5.22	2.1908	0.000108	0.00441	0	2.32128	17.1601	4.89501	12270.9	215.637	310.558	1106.5	2637.11	697.848	3.53138	1340.78	0	410.715	3836.89	0	0	0	8.84167	0	0	3.06606	NA
NonamEVm007513t1	333.21	3.47	1.29566	0.000231	0.00787	58.5653	45.9225	41.9936	475.441	728.447	239.505	1283.04	96.8015	141.212	232.276	29.1296	469.597	2746.99	57.617	475.54	78.0743	0	61.7841	41.5343	26.1726	0	1.0453	NA
NonamEVm007675t1	3923.94	2.8	1.01709	0.000244	0.00825	165.801	352.52	228.309	292.43	1200.09	377.928	858.718	2844.02	2350.59	1146.84	539.71	1948.01	1204.95	3402.43	3054.98	331.553	567.875	653.965	4419.71	21130.5	2895.27	36360.4	Phosphoglycerate mutase 2
NonamEVm007682t1	38.74	5.85	2.2413	4.32e-05	0.00217	0	0	0	0	63.0413	66.0904	123.707	65.6803	105.339	40.8234	0	174.524	4.24657	68.0036	140.79	0	0	0	0	0	0	0	NA
NonamEVm007784t1	60.79	-5.28	1.2045	6.71e-07	8.18e-05	434.012	266.662	129.424	105.254	7.85907	150.044	5.06514	6.17308	12.3555	16.8387	122.644	1.13939	3.23482	7.34227	3.75334	0	0	23.3006	14.2525	4.58462	0	23.3338	NA
NonamEVm007834t1	20317.8	6.22	1.59519	1.36e-06	0.000141	0	29.1966	52.5374	2652.51	10.6403	0	7089.9	13928	3919.27	5057.48	277.273	3768.37	5559.26	8706.21	5984.3	466.149	464.286	219.502	10481.5	211475	15822.9	151026	Actin, muscle-type A2
NonamEVm007865t1	175.34	-3.85	1.11952	4.07e-05	0.00207	1659.88	440.954	127.621	207.508	47.2794	538.681	231.568	26.3776	87.2507	149.796	24.2269	68.2665	29.2144	15.4005	19.4783	0	0	85.8864	36.5159	3.44973	40.593	17.4733	NA
NonamEVm007961t1	60.54	-4.93	1.15806	1.57e-06	0.000156	376.397	278.186	52.3135	45.4253	27.1209	185.321	17.1327	7.36436	23.6506	18.3194	149.81	5.57273	1.13966	8.72249	2.23415	104.378	0	9.28681	13.2602	1.81518	0	4.33029	Alpha-amylase 1
NonamEVm008095t1	41.08	-5.58	1.31529	8.54e-07	9.61e-05	283.508	205.755	62.5842	62.2072	8.77861	54.3846	5.13856	2.90145	13.9384	16.473	73.6424	4.51434	0.771672	0	1.61573	0	0	24.2514	16.3484	0	57.688	9.27343	NA
NonamEVm008205t1	402.38	4.07	1.1274	2.33e-05	0.00134	12.7292	13.2586	52.2957	72.4202	112.629	44.6333	306.886	281.105	405.96	279.267	42.5649	956.409	484.546	650.518	713.425	293.632	0	196.878	1300.84	1347.35	175.653	1109.39	Glutathione S-transferase 1, isoform D
NonamEVm008301t1	55.89	-4.48	1.84253	0.00019	0.00674	439.733	171.308	35.6009	43.9307	5.74921	159.718	1.22502	0	3.48134	4.44916	50.1814	6.35497	2.69519	2.28662	0	245.581	0	30.3985	19.7195	0	0	7.17974	Innexin inx2
NonamEVm008407t1	27.63	-4.24	1.13533	1.53e-05	0.000953	100.557	88.1309	125.713	39.5386	12.6156	137.886	2.66153	16.2029	11.2804	17.5017	19.3388	0.694953	0.7561	9.23377	3.81316	0	0	0	4.56429	9.49087	0	7.78247	Tyrosine-protein kinase Src64B
NonamEVm008414t1	69.02	6.68	2.17329	7.93e-06	0.00059	0	0	0.866278	0	30.5224	2.91794	84.3644	80.0858	82.5719	131.908	0	45.0439	797.656	30.5144	121.544	0	56.9473	0	14.4771	5.85681	0	33.249	NA
NonamEVm008687t1	30.31	-4.24	1.10101	1.05e-05	0.000736	210.334	66.7941	26.1414	60.1759	7.2495	92.1298	8.4162	15.6191	12.0465	5.51964	48.3319	6.75742	4.73217	0.742201	0.882494	0	47.2432	33.0907	8.82785	8.31219	0	3.36472	NA
NonamEVm008729t1	80.22	4.89	1.64679	5.63e-05	0.00264	0	0	7.54348	0	268.035	24.7121	92.3201	241.538	122.666	38.9339	17.0893	506.915	72.0592	51.8411	262.807	11.5956	0	0	17.31	5.09947	0	24.2749	NA
NonamEVm008736t1	35.99	-5	1.4716	2.09e-05	0.00122	443.07	136.792	31.9666	64.6552	12.0144	13.9448	3.74559	0.490326	12.1426	1.93797	43.0517	3.34679	3.18722	4.06526	0	0	0	0	4.8366	0	0	12.457	NA
NonamEVm008846t1	1409.43	-3.95	1.15206	3.95e-05	0.00204	4334.11	2877.62	4604.51	3166.61	128.726	10220.8	878.829	157.722	264.239	784.174	836.03	144.885	99.2614	174.586	214.296	765.374	0	537.998	260.965	139.571	327.456	89.8414	NA
NonamEVm008930t1	25.41	-4.81	1.02108	2.56e-07	3.8e-05	152.633	54.0563	36.4482	20.1813	3.83043	81.1057	7.54495	5.6541	8.72488	18.2413	21.4902	1.28113	3.07799	2.23222	0.970967	0	69.8283	34.8173	32.0411	0	0	4.78483	NA
NonamEVm008981t1	152.51	5.12	1.77967	5.52e-05	0.00262	1.77671	0	2.89747	1.24387	871.665	0	247.97	76.0659	98.0453	117.665	2.00373	222.661	231.95	42.7059	225.136	798.203	248.115	30.8301	136.353	0	0	0	NA
NonamEVm009383t1	2340	-4.31	1.19662	2.09e-05	0.00122	341.001	319.602	179.596	1122.59	10.7994	233.131	1.66342	13.8147	15.7351	4.54582	46.4417	3.66745	5.06448	11.6871	12.4237	20928.4	19151.5	3015.76	2113.28	775.37	1679.69	1494.25	Heme-binding protein 1
NonamEVm009435t1	33.32	-4.24	1.63993	0.000178	0.00643	255.611	129.529	39.1103	68.2786	3.38635	17.8282	8.72343	0	7.59017	6.46733	41.8843	1.96059	1.82868	6.98032	0.853409	124.919	0	0	11.7625	0	0	6.26405	NA
NonamEVm009442t1	36.53	17.44	4.24155	1.41e-07	2.35e-05	0	0	0	0	34.7817	0	361.478	104.135	74.8624	58.6044	0	67.6486	0	2.6195	99.6349	0	0	0	0	0	0	0	NA
NonamEVm009445t1	50.55	-2.37	0.760206	0.000122	0.00486	119.548	202.875	145.905	95.5232	50.3247	23.3897	87.704	55.1601	45.4499	67.7874	50.9517	21.2826	25.1092	28.3402	25.6764	0	0	17.7132	16.2927	20.0075	0	13.1214	NA
NonamEVm009509t1	72.11	-5.38	1.14097	1.42e-07	2.35e-05	835.665	202.652	40.3644	94.3678	11.7317	111.456	4.97894	2.97701	5.59659	6.52454	44.1982	5.70401	0.930706	10.5774	2.5815	62.537	16.3149	12.2108	72.6523	2.20213	31.6072	8.54614	NA
NonamEVm009582t1	64.22	4.04	1.6818	0.000272	0.00905	5.14674	0	4.20247	11.9888	79.6082	3.84014	102.241	138.724	208.54	161.329	5.76667	87.7659	69.5411	201.901	173.134	0	0	0	68.6399	30.4256	0	60.0977	NA
NonamEVm009709t1	65.65	-4.78	1.28743	1.09e-05	0.000756	692.349	318.573	46.1605	115.52	7.37921	20.9554	8.02655	1.51091	9.34739	14.5941	85.5038	10.1407	2.80937	6.56164	6.53925	74.8854	0	6.36416	10.6443	0	0	6.41014	NA
NonamEVm009795t1	26.76	-4.12	1.32827	7.54e-05	0.00333	172.304	54.1818	21.7496	18.6276	13.2369	196.521	5.40271	3.92487	11.6335	27.786	30.2968	2.51524	5.93068	1.16216	0.426369	0	0	0	2.07375	3.26572	0	17.6981	NA
NonamEVm009846t1	7071.01	-8.71	1.62299	3.37e-11	2.15e-08	2244.79	216.083	1970.29	4286.34	2.73455	1416.04	15.2448	9.82685	4.49657	15.9633	3.98888	0	0	0	6.16434	5216.59	9597.09	10791.4	6912.07	12803.6	23739.1	76310.5	NA
NonamEVm009939t1	58.69	-4.57	1.62895	9.82e-05	0.00409	526.092	205.903	41.561	36.4564	14.1892	187.502	3.5905	0	6.84102	12.6452	106.924	2.21367	7.15148	2.50418	4.59579	0	0	88.8373	29.6267	0.343739	0	14.1145	NA
NonamEVm009946t1	22.6	-3	1.02261	0.000163	0.00604	111.47	90.2711	13.8863	48.4458	12.9037	33.4941	29.5332	66.3818	20.7203	26.1136	6.68922	8.2107	8.44137	2.43068	6.59697	0	0	0	0.826232	7.87655	0	2.84251	NA
NonamEVm010041t1	50.4	-5.29	1.19172	5.21e-07	6.64e-05	553.754	101.242	46.3513	52.1272	17.2333	221.932	8.72165	4.41711	5.56345	21.9753	36.2796	6.99476	2.74022	1.74388	1.27934	0	0	0	10.3719	10.8909	0	5.21352	NA
NonamEVm010069t1	181.47	19.22	5.38014	7.75e-07	9.07e-05	0	0	0	0	0	0	0	0	0	0	0	0	1046.39	0	0	1496.6	1158.43	251.907	7.62124	11.0633	0	20.3644	Crustacyanin-C1 subunit
NonamEVm010088t1	104.88	-5.66	1.24059	2e-07	3.2e-05	520.257	232.894	163.005	102.245	59.0163	717.782	12.0166	19.1281	67.0827	39.272	159.294	2.39431	5.38679	2.86005	1.67462	30.6226	0	0	37.341	37.743	0	97.3386	NA
NonamEVm010093t1	1073.85	11.07	2.12094	1.67e-11	1.11e-08	0	0	2.90577	2.48829	269.216	5.96864	21.6517	259.933	582.661	51.7772	18.7669	986.41	16374.6	352.681	122.565	469.403	2146.17	801.071	1127.12	26.1653	0	3.12679	Crustacyanin-C1 subunit
NonamEVm010097t1	4483.4	4.74	0.792069	2.96e-10	1.38e-07	558.23	358.141	394.733	225.727	1228.7	216.808	844.05	7458.38	4590.68	1198.44	4670.4	5524.67	41075.8	2923.21	10525.7	2957.2	3482.65	6131.84	3491.94	279.146	237.381	260.978	Crustacyanin-C1 subunit
NonamEVm010256t1	27.54	-5.75	1.53727	4.02e-06	0.000339	233.386	200.958	20.1725	43.3532	1.23071	15.6855	0.828354	0	0.506532	3.24371	33.5801	0.847862	1.38355	0.583974	1.2836	0	0	36.7252	9.02595	0	0	3.16845	NA
NonamEVm010258t1	147.53	19.01	1.92441	1.63e-23	5.61e-20	0	0	0	0	7.04284	0	0	25.0238	9.07398	3.22811	1.98921	93.9349	4.58937	72.0636	33.213	0	0	24.3694	330.969	1114.78	934.684	590.639	NA
NonamEVm010289t1	78.09	5.78	2.10125	3.71e-05	0.00198	0	0	2.7097	1.37518	0	0	24.1985	182.698	55.0525	21.8348	0.449404	267.897	474.88	131.413	196.489	0	0	126.248	204.495	11.5749	0	16.5896	Myosin heavy chain, muscle
NonamEVm010397t1	55.45	5.61	2.14961	5.47e-05	0.0026	0	0	0	0	0.92403	0	45.2553	255.046	26.8516	7.12915	0.399581	51.5029	55.5767	74.6445	109.455	0	70.7085	49.2813	50.6271	189.082	2.25699	231.078	Actin-2
NonamEVm010400t1	5385.53	-5.7	1.08534	6.51e-09	2.05e-06	28761.1	11381.2	6731.88	3163.65	1071.35	52806.9	486.917	332.204	863.502	759.654	4882.4	294.094	133.517	141.738	145.522	608.564	594.696	788.806	798.297	422.852	797.371	2515.53	C-type mannose receptor 2
NonamEVm010507t1	154.94	4.53	1.80009	0.000159	0.00595	1.63006	0	1.3266	3.43231	6.83101	0	0.509428	2.29158	8.42597	3.01198	1.98828	6.0687	271.178	2.00006	5.16384	792.459	677.208	525.664	1032.19	52.4927	0	14.8516	Cuticle protein AM1199
NonamEVm010519t1	2481.69	5.75	0.957058	8.8e-11	4.59e-08	115.966	135.119	87.212	108.137	1009.37	115.618	379.025	2673.19	2210.58	748.913	1225.54	2348.26	29895.7	1825.36	2095.78	1723.3	1218.91	3656.05	2865.76	14.9425	114.772	29.7664	Crustacyanin-A2 subunit
NonamEVm010529t1	4107.65	5.18	0.919814	1.52e-09	5.95e-07	240.967	155.556	470.604	23.851	462.728	92.8898	257.81	3151.94	3641.78	333.498	3455.79	5175.11	42520.8	2656.69	9576.91	4120.58	1819	7115.19	4589.2	143.96	154.911	208.527	Crustacyanin-A2 subunit
NonamEVm010620t1	950.35	9.25	2.84406	4.56e-07	6.03e-05	0	0	1.11095	4.7627	1.6539	0	266.289	2541.04	227.699	144.786	0	442.642	2446.66	2047.41	1573.49	0	241.613	5453.5	1191.03	1139.41	0	3184.54	Myosin heavy chain, muscle
NonamEVm010861t1	72.14	14.82	8.74935	2.24e-05	0.00129	0	0	0	0	0	0	0	0	0	0	0	0	995.314	0	0	0	325.496	222.808	43.5125	0	0	0	Phosphatidylethanolamine-binding protein 1
NonamEVm010891t1	13016.9	-3.82	1.42875	0.000198	0.00701	31661.4	57665.3	7768.27	22499.8	746.805	72406.2	24353.7	7710.88	971.735	17354.5	34872.4	706.071	223.016	934.896	2713.26	462.491	0	193.526	998.404	202.705	336.442	1590.78	NA
NonamEVm010899t1	87.76	-3.04	0.992703	0.000125	0.00496	206.364	360.232	162.531	399.625	60.0201	63.0669	261.695	120.845	64.5891	106.981	31.2212	45.6526	7.84187	16.8048	16.0389	0	0	0	2.74443	0	0	4.50272	NA
NonamEVm010949t1	4635.82	4.01	1.32515	9.35e-05	0.00391	140.572	449.62	72.6149	418.042	21535.3	5729.52	7640.88	10299	7213.83	9062.16	39.5556	3448.65	9699.04	5020.62	8330.66	10312.2	28.9035	1060.73	1392.76	21.8263	47.5157	24.0207	Cuticle protein AM1199
NonamEVm010951t1	4822.32	-6.73	1.41736	1.96e-08	5.2e-06	47341.6	30184.9	3606.19	2991.58	229.474	1018.69	102.875	62.3601	249.302	381.926	8998.58	188.044	61.9508	108.739	74.4717	4123.52	2517.16	752.2	1563.33	102.449	0	1431.77	Vitelline membrane outer layer protein 1 homolog
NonamEVm011053t1	43.58	19.31	2.2698	4.85e-18	5.96e-15	0	0	0	3.73471	0	0	227.093	21.6041	26.3435	115.789	0	19.2729	225.718	8.72329	44.3923	15.6544	228.34	12.4484	9.68646	0	0	0	NA
NonamEVm011054t1	327.01	2.85	0.881316	8.64e-05	0.0037	21.8834	31.9023	50.177	76.327	219.037	167.973	648.711	113.694	132.485	486.649	838.911	354.271	561.164	130.369	237.617	756.377	868.606	261.714	1034.34	38.7066	101.959	61.3836	NA
NonamEVm011306t1	534.53	-5.63	1.14687	4.18e-08	9.48e-06	2093.85	1406.31	531.344	926.712	29.2331	1269.17	24.3929	14.2783	32.6389	78.9764	935.327	26.1867	9.79329	15.5973	9.37601	680.185	1825.86	343.953	690.921	319.211	157.646	338.783	Extracellular protease inhibitor 10
NonamEVm011433t1	274.95	11.42	5.58134	1.2e-05	0.000808	0	0	0	94.9745	0	11.7224	7.92556	0.502122	1.02699	19.7848	0	18.8202	0	0.594546	0	4249.94	1304.96	0	0	0	338.579	0	NA
NonamEVm011550t1	49.01	-4.36	1.31395	4.06e-05	0.00207	326.2	164.464	54.6807	103.87	7.0821	64.3704	9.50852	1.47936	11.655	8.43242	107.179	5.97404	2.77123	4.07557	5.55183	0	0	36.7966	18.1065	1.09079	114.311	30.711	NA
NonamEVm011564t1	47.95	5.05	1.42277	1.37e-05	0.000871	0	0	5.56724	15.5177	46.196	27.4646	24.3613	55.3338	53.4562	52.367	2.56446	298.893	55.6876	147.879	71.0653	0	139.521	0	51.2223	0	0	7.85956	NA
NonamEVm011652t1	23.18	-23.55	5.21911	1.24e-07	2.15e-05	128.715	47.917	137.161	24.9982	0	25.9623	0	0	0	0	145.222	0	0	0	0	0	0	0	0	0	0	0	NA
NonamEVm011656t1	744.35	-6.71	1.49617	6.79e-08	1.3e-05	4896.53	4011.05	1458.23	2418.04	17.552	535.204	55.8334	21.3413	19.6093	44.9214	2732.16	9.87592	9.55554	17.4644	14.4789	0	0	28.4579	17.1092	21.0755	0	47.2347	NA
NonamEVm011727t1	3631.47	5.49	1.2229	3.48e-07	4.83e-05	8.1942	6.80328	9.36592	146.165	8.56084	0	426.712	207.86	370.383	346.487	37.4469	611.521	686.782	837.206	652.808	1584.52	170.382	3496.01	14018.9	27248.2	6288.07	22729.8	NA
NonamEVm011801t1	1281.69	-7.08	1.11639	1.51e-12	1.13e-09	6436.51	6500.86	3230.41	3520.68	34.8912	826.329	827.873	116.064	79.5289	625.389	4320.46	35.71	13.7694	19.283	24.3735	251.144	231.856	143.098	249.663	95.2428	95.3231	518.631	Glutathione peroxidase
NonamEVm011806t1	16357.9	3.82	1.12472	4.59e-05	0.00228	46.3133	203.051	1902.52	1701.54	1708.58	125.621	4977.43	12366.7	10116.3	5921.73	749.899	14726.1	11372.7	19843.8	17078.4	1972.17	1621.81	1474.97	11816.9	114915	23445.4	101787	Muscle-specific protein 20
NonamEVm011895t1	392.37	6.56	3.50534	6.74e-05	0.00304	0	0	0	0	0	0	15.7937	580.132	22.084	1.05568	0	341.882	764.244	624.573	650.367	0	1676.11	283.801	433.264	1921.24	0	1317.6	Actin
NonamEVm011916t1	216.58	21.26	2.70717	1.04e-15	1.05e-12	0	0	0	0	1129.35	0	225.98	460.777	819.029	295.728	0	359.852	90.5488	459.169	554.429	0	0	5.90022	63.023	254.77	0	46.3022	Actin-11
NonamEVm011934t1	38.93	5.96	2.14237	2.93e-05	0.00162	0	0	0	4.93112	9.4507	0	92.8758	56.6807	74.0862	54.2477	0	43.9733	119.626	160.343	47.8233	0	0	41.8871	80.2786	43.6685	0	26.5242	NA
NonamEVm011946t1	1533.96	-2.71	1.01843	0.000298	0.00963	3641.1	7563.48	1443.3	2184.8	351.09	5534.14	2537.21	847.401	386.982	1775.64	1083.08	276.086	913.3	121.515	549.216	235.105	1706.3	297.663	360.431	634.914	539.305	764.964	Glutathione peroxidase
NonamEVm011949t1	45.43	-3.91	1.6088	0.000283	0.0093	102.98	17.3497	184.077	276.651	2.26791	34.6583	140.005	1.79398	0.615541	30.3735	41.8761	3.61095	5.47302	0	1.96471	0	0	37.4737	23.7101	6.02196	79.5562	8.92106	NA
NonamEVm011954t1	386.26	-3.54	1.14602	0.000101	0.00417	2145.48	1287.16	456.567	631.943	212.643	1998.15	209.448	23.5373	97.1668	178.963	308.598	64.9661	63.7287	51.1099	107.011	218.989	0	37.3441	111.944	30.457	226.239	36.3161	EF-hand domain-containing protein D2 homolog
NonamEVm012101t1	211.03	-3.41	0.781868	2.42e-06	0.000222	1137.54	718.775	321.173	489.04	170.25	533.409	147.011	32.4309	103.369	169.578	191.276	47.2864	78.1053	44.2316	53.8117	219.092	31.9802	55.9105	76.1595	6.54133	0	15.631	NA
NonamEVm012189t1	387.72	4.48	1.87359	0.0002	0.00704	10.3393	0	1.86774	17.9419	1345.24	32.6229	461.397	1552.11	727.656	477.156	0	365.933	95.5913	34.2503	624.839	30.1255	78.011	950.395	1690.96	27.8224	0	5.66774	NA
NonamEVm012335t1	310.77	20.1	3.11473	1.67e-11	1.11e-08	0	0	0	31.2607	0.220709	104.262	76.7104	1861.96	1641.93	141.122	0.286759	0	0	767.263	0.760435	501.528	0	0	757.155	0	333.088	619.44	Cuticle protein AMP1B
NonamEVm012352t1	19016.6	6.7	1.64307	3.74e-07	5.07e-05	164.608	122.306	65.9576	158.75	114399	80.6103	6518.64	70114.4	64147.2	10689.1	88.144	27240.5	38.5241	33157.6	88327.2	48.2722	1385.56	382.148	32.1711	667.217	293.073	244.698	NA
NonamEVm012412t1	1088.08	5.88	2.21658	3.91e-05	0.00204	0	10.4846	7.29888	89.953	9.97018	19.8472	0	0	2.47423	0	0	2.10235	8607.07	0.527293	0.386226	6737.3	6983.57	841.522	122.506	111.884	336.708	54.0873	Pro-resilin
NonamEVm012515t1	3397.78	7.19	1.63676	4.89e-08	1.04e-05	7.16858	53.5454	4.38478	0	4348.72	57.8358	609.232	20942.7	6891.32	2550.25	12.5191	6325.47	9388.4	6998.44	14039.9	1408.37	875.063	80.9298	104.82	28.7201	0	23.3555	Cuticle protein AM1159
NonamEVm012733t1	1038.25	6.11	3.15577	8.53e-05	0.00368	0	0	3.30163	4.29241	0	0	277.403	3592.02	332.783	35.6057	0	901.182	2249.54	907.632	1380.17	0	5968.69	247.663	1235.55	2435.08	2.10137	3268.56	Actin-3, muscle-specific
NonamEVm012831t1	296.12	15.46	4.66959	7.17e-07	8.69e-05	0	0	0	2.49562	0	0	0	0	0	0	0	0	91.174	0	0	2986.41	2940.76	79.0946	406.962	4.45873	0	3.27206	NA
NonamEVm012858t1	800.11	-5.17	1.24437	1.85e-06	0.00018	2456.99	1322.76	576.318	431.375	128.166	8359.11	50.4405	74.7277	131.644	78.0308	1591.5	22.5463	27.3579	15.9221	17.7463	172.454	500.911	39.467	98.6851	236.873	82.5433	1186.92	Lysozyme C
NonamEVm012873t1	818.47	4.57	1.39786	3.94e-05	0.00204	6.76212	16.6238	84.7704	105.966	240.466	1.58488	1564.34	2106.73	1659.3	1283.28	12.3355	1359.36	1776.04	2521.45	1623.16	0	210.382	1371.49	1091.76	432.617	126.273	411.668	Troponin C, isoform 2B
NonamEVm012937t1	26.15	-4.9	0.971256	4.66e-08	1.03e-05	180.432	162.287	66.9761	23.3738	3.06189	48.1372	6.98213	4.9387	10.1056	12.3268	24.7605	1.70789	3.71425	4.09369	2.99495	0	0	0	4.17082	12.0598	0	3.2095	NA
NonamEVm012980t1	80.01	4.85	2.49031	0.000248	0.00835	0	0	0	438.215	119.615	17.2601	298.163	80.7567	114.017	227.714	0	53.5616	0	20.1368	195.012	0	0	0	8.25001	0	150.472	37.0039	NA
NonamEVm012983t1	33.71	5.39	2.38869	0.000108	0.00441	0	0	0	1.23665	5.20928	0	142.626	84.5752	24.94	61.4432	0	53.576	63.1139	175.976	46.6993	0	0	0	23.5144	16.3101	0	42.3681	NA
NonamEVm013044t1	2249.89	-3.83	1.29151	0.000115	0.00463	7435.39	6721.2	2495.92	1233.6	215.538	840.758	128.889	72.134	351.446	240.584	13954.9	466.98	208.921	85.4278	116.821	2391.38	6589.38	790.141	475.514	968.392	2193.42	1520.84	NA
NonamEVm013067t1	169.73	-2.88	1.09268	0.0003	0.00968	750.085	456.384	260.938	175.8	113.376	998.985	61.3193	34.014	87.5322	81.368	108.039	51.3247	37.8233	43.7899	49.3078	163.266	0	121.185	72.8392	8.9246	30.6943	27.0179	NA
NonamEVm013128t1	226.45	19.38	6.24184	1.9e-06	0.000183	0	0	0	5.03824	0	0	0	0	0	0	0	0	2581.26	0	0	809.532	1491.59	61.1479	26.4777	6.77707	0	0	NA
NonamEVm013130t1	1053.33	3.71	1.42988	0.000239	0.0081	3.02632	30.5764	133.175	46.0068	61.1545	1.67404	14.5069	577.652	141.36	26.5689	2.49383	452.923	4182.57	239.618	914.392	6183.42	3108.24	900.222	1851.99	431.841	1046.24	2823.56	Cuticle protein AMP1B
NonamEVm013166t1	2189.84	4.45	1.0703	3.33e-06	0.000294	36.8205	96.8244	147.603	59.4811	76.2264	20.213	40.0852	1205.49	348.635	40.7043	6.85545	946.569	8177.51	907.733	2833.59	13516	6017.25	2347.8	4126.48	739.499	2390.83	4094.28	Cuticle protein AM1159
NonamEVm013229t1	323.99	10.54	2.51109	4.15e-09	1.4e-06	0	0	0	0	1.236	3.88376	0.414399	104.699	7.13967	2.61949	18.5427	41.6755	4693.99	86.1918	82.0583	594.148	1383.95	24.2632	44.2084	38.7377	0	0	Endocuticle structural glycoprotein SgAbd-8
NonamEVm013238t1	937.64	5.63	3.1689	0.000146	0.00558	5.54327	3.61958	0	34.0893	1.84603	1.95794	0	0	0	0	2.05755	0.597398	12641.9	0	0	1470.4	5412.69	842.191	89.449	54.7139	25.482	41.4509	NA
NonamEVm013260t1	36.25	-4.39	1.26515	2.79e-05	0.00155	310.437	88.2927	27.497	80.6683	9.54375	85.0168	11.6263	2.45799	9.61775	10.3557	45.9	2.80642	2.29025	5.82249	3.84308	0	0	92.5724	5.5401	0	0	3.14009	NA
NonamEVm013360t1	85.93	-5.75	1.59794	5.98e-06	0.000466	920.575	455.9	55.3479	332.511	6.1223	19.9175	1.85998	0	2.83509	43.4522	23.5291	1.00216	2.05338	6.60166	2.39184	0	0	0	7.94221	8.46121	0	0	NA
NonamEVm013488t1	10200.6	8.25	1.90216	1.3e-08	3.61e-06	0	9.50312	1.46236	968.376	0	0	1622.23	3363.75	1301.28	1719.39	291.419	3296.77	3218.81	3945.73	4123.84	3543.98	93.4248	389.47	23013.8	39787.2	4746.23	128977	Troponin C
NonamEVm013495t1	154.04	20.75	2.15582	1.94e-22	4.77e-19	0	0	0	0	1.84678	0	6.65302	4.40926	9.0992	18.718	0	426.652	186.075	77.1755	70.7018	0	0	49.6958	656.538	1015.09	0	866.115	Troponin C, isoform 2
NonamEVm013563t1	619.24	9.07	2.37735	5.21e-08	1.07e-05	0	0	0	14.9479	1096.21	0	17.9165	84.351	41.4899	42.6201	0	136.665	47.1352	249.11	1883.7	2667.57	1362.83	1020.39	2336.06	242.632	2339.18	40.5376	Cuticle protein AM1239
NonamEVm013574t1	1215.79	8.64	1.77407	5.56e-10	2.33e-07	1.77142	8.24886	2.88544	24.8386	37.3528	1.95884	0.415091	47.0901	13.223	2.60782	206.807	89.964	18258.7	85.7122	33.5352	2345.28	4538.33	574.888	144.471	219.983	70.0013	39.4257	Larval cuticle protein LCP-17
NonamEVm013603t1	4829.55	8.14	1.79657	6.17e-09	2e-06	35.6397	19.1359	7.18141	16.092	13194.7	8.08332	392.187	8780.19	5454.79	939.879	7.66947	30219.9	161.26	8107.03	30251.4	1290.01	4991.82	315.385	707.716	43.7326	1273.37	32.997	Cuticle protein AMP1A
NonamEVm013674t1	85.45	-4.81	1.22932	5.85e-06	0.000461	750.327	330.403	79.2479	119.23	18.8779	152.236	9.49883	8.80156	17.9557	21.3432	53.9182	6.29919	4.03099	13.4392	5.97676	115.863	0	92.6372	43.6299	0	0	36.1563	NA
NonamEVm013684t1	1339.26	6.07	2.19981	2.75e-05	0.00154	0	13.4827	10.8334	99.3993	8.55086	0	0	7.33167	0	0	57.5203	12.0215	12988.1	11.4866	17.9669	7251.19	7792.12	567.829	231.65	105.719	239.189	49.4109	Cuticle protein AM1199
NonamEVm013714t1	6600.36	-6.6	1.39071	2.47e-08	6.25e-06	60006.5	37361.5	7392.3	14573.6	144.234	859.902	144.218	56.7944	86.075	717.943	13193.7	116.512	258.486	159.072	94.3936	2786.6	1737.62	435.228	830.713	529.272	319.81	3403.27	NA
NonamEVm013824t1	185.89	7.84	2.57715	2.61e-06	0.000235	1.7748	0	0	0	2.76948	1.98157	0	0	35.907	0.646277	440.105	502.718	2502.87	1.16248	185.063	327.804	0	49.4808	25.5817	6.53392	0	5.21273	NA
NonamEVm013826t1	2893.31	2.85	0.723759	1.23e-05	0.000814	142.455	624.43	568.444	678.281	2158.67	314.716	894.726	2455.03	2389.86	1360.13	779.716	3890.48	4419.99	3599.52	3207.37	2582.41	1285.76	1647.51	5080.29	11020.9	4099	10453.1	Profilin
NonamEVm013920t1	438.11	-5.26	1.09149	9.92e-08	1.78e-05	3592.22	2310.59	358.29	541.128	115.85	290.126	42.1201	70.0411	121.614	224.91	868.522	37.95	17.7783	24.7226	50.324	177.296	137.701	69.2245	65.3226	18.5257	2.845	501.28	NA
NonamEVm013930t1	46.84	4.56	2.22532	0.00029	0.00946	0	0	0	10.7936	0.26785	0	0.361078	1.28433	1.75349	0	0	8.21784	124.025	2.70182	10.5485	583.919	144.597	56.5922	36.3551	44.1655	0	4.86756	NA
NonamEVm014025t1	219.66	-3.95	1.38671	0.000135	0.00527	949.768	922.487	239.278	305.826	21.5816	784.681	167.341	27.3937	17.3084	113.794	515.589	20.6908	13.1221	5.30712	53.9138	0	384.699	0	44.8613	58.6112	63.0409	123.328	Single insulin-like growth factor-binding domain protein-2
NonamEVm014028t1	650.5	8	1.91441	3.62e-08	8.53e-06	0	8.23684	0	3.72009	385.465	1.95074	4.55729	474.064	351.75	46.2919	52.9953	82.133	9663.04	115.11	81.6883	858.809	584.097	341.109	989.294	166.174	0	100.465	Cuticle protein AMP2
NonamEVm014069t1	2113.31	3.88	1.1579	4.91e-05	0.00238	24.9721	64.8264	61.7279	160.757	345.043	549.625	17.3264	197.804	261.279	13.0851	2.41907	1084.36	2077.86	455.821	1176.61	19568.4	3515	2373.86	3474.68	999.821	5486.56	4580.9	Cuticle protein AMP1B
NonamEVm014077t1	37.21	9.46	5.01584	2.12e-05	0.00123	0	0	0	0	0	0	0	2.5015	0	0	0	3.77776	1.89665	0	0.431594	0	364.921	0	70.9641	150.02	0	224.048	Actin, muscle 2/4/4A
NonamEVm014115t1	594.34	4.95	1.33894	9.86e-06	0.000704	8.80419	8.27147	0	58.3917	150.588	230.731	10.8364	21.9753	44.8598	0	2.45621	432.9	644.849	22.3908	377.258	6049.63	2197.31	160.816	568.747	200.691	583.479	1300.57	Cuticle protein AMP1B
NonamEVm014317t1	1518.66	-4.35	1.00859	1.95e-06	0.000185	13830.7	5812.04	603.233	1604.15	81.1174	1055.3	556.872	777.732	425.62	1062.01	1777.64	67.688	61.1846	356.708	404.826	626.021	2783.32	261.02	409.128	91.562	199.168	563.497	NA
NonamEVm014334t1	369.14	8.49	2.50956	4.96e-07	6.37e-05	0	0	0	11.097	0	0	14.7831	565.599	27.9942	0.655563	0	195.682	628.605	665.841	535.575	0	1653.63	297.921	371.357	1670.74	74.0334	1407.46	Actin
NonamEVm014413t1	25.17	-4.79	1.97423	0.000149	0.00568	0	72.636	21.5099	51.8566	1.8416	128.455	0	4.93007	2.02288	5.18711	17.9703	0.566479	0	0	0.427577	0	0	0	15.2712	103.93	94.2871	32.8729	NA
NonamEVm014433t1	23.52	5.79	2.14596	3.98e-05	0.00205	0	0	0	2.42701	22.75	6.48317	43.3606	7.67524	4.94422	70.6834	23.7723	4.16219	320.853	1.26873	5.00211	0	0	0	4.05513	0	0	0	NA
NonamEVm014563t1	24.58	-4.61	1.21696	1e-05	0.00071	389.372	38.1521	2.18275	1.87421	3.75019	15.286	8.80402	13.6567	7.31772	3.57718	26.3074	5.81644	2.08497	1.32239	3.57674	0	0	4.64455	6.16217	6.95517	0	0	NA
NonamEVm014575t1	1388.09	-7.24	1.4054	1.21e-09	4.96e-07	16257.1	5950.07	954.491	3287.14	76.2215	745.461	111.208	31.983	97.8763	590.989	158.294	6.16971	0	61.7751	23.516	1095.82	5.78017	142.711	235.01	132.113	267.096	307.228	NA
NonamEVm014657t1	36.24	5.23	1.79318	4.65e-05	0.00229	0	1.39123	0	0	71.6335	9.10675	43.923	204.03	35.8746	36.2415	12.8965	30.5432	31.2312	153.667	75.735	55.4098	3.03788	2.54597	27.3072	2.62804	0	0	NA
NonamEVm014674t1	49.38	-3.97	1.15906	3.94e-05	0.00204	384.446	238.526	77.3923	79.9784	12.71	44.4193	11.4945	12.0709	13.1906	22.5036	89.6929	4.76614	9.24672	15.0178	7.8189	0	0	0	13.9359	44.0483	0	5.1308	NA
NonamEVm014686t1	1438.16	-5.04	1.27254	4.09e-06	0.000344	608.023	61.0603	9756.24	3487.35	21.8272	163.928	69.4169	54.8648	44.8559	123.909	395.778	106.896	17.0127	37.4509	52.5061	573.398	796.792	3387.87	1501.55	1257.18	2912.65	6208.94	Phosphoenolpyruvate carboxykinase [GTP], mitochondrial
NonamEVm014699t1	67.03	-4.78	1.48876	3.78e-05	0.00199	831.356	285.665	21.8186	122.143	3.4133	17.5463	10.4363	13.1847	6.27919	17.1994	38.1882	8.06714	0.40541	9.28235	5.2956	0	0	0	16.9608	0	66.5926	0.925984	NA
NonamEVm014721t1	27.45	-3.93	1.32781	0.00011	0.00449	380.707	31.3893	9.8737	31.8391	5.19171	3.77411	7.74466	23.871	17.7043	5.21482	3.20402	4.03296	2.82006	8.82842	4.29779	0	0	0	0	1.10487	57.9393	4.37493	NA
NonamEVm014828t1	1042.73	6.48	1.42743	7.5e-08	1.39e-05	0	12.9515	28.7969	12.4078	5.86278	9.7572	700.146	3011.37	804.199	1148.38	20.8921	362.795	8021.26	1039.73	2573.37	1796.8	1473.19	987.141	904.824	14.3178	0	11.7685	NA
NonamEVm014837t1	221.94	-4.28	1.87411	0.00027	0.009	5.29558	72.7823	455.835	329.106	18.4476	134.819	0	0	1.51922	0	0	1.69892	0	2.9215	5.99169	0	0	0	3.47322	203.611	2240.54	1406.56	NA
NonamEVm014854t1	12049.2	-6.17	1.30796	5.12e-08	1.06e-05	210.039	294.195	206.965	749.772	1.95028	215.806	9.53136	0	2.13859	2.73568	2.0485	5.27861	0	0.61538	0	54175	114615	56400.3	34260	1914.01	1268.08	750.208	NA
NonamEVm014863t1	60.23	-4.87	2.19934	0.000182	0.00653	664.448	301.64	7.24996	68.3236	0.923974	19.8406	2.07852	0	2.53074	2.58703	83.7809	1.39948	6.39637	0	0	156.242	0	0	3.4595	0	0	4.17184	NA
NonamEVm015160t1	90.4	7.5	2.06443	6.11e-07	7.57e-05	0	0	0	0	155.754	148.562	278.536	97.5567	71.4352	242.761	4.51424	48.8423	665.555	8.98992	121.62	0	116.533	18.8469	7.12769	0	0	2.16876	NA
NonamEVm015302t1	69.19	-9.14	2.69971	2.94e-07	4.25e-05	744.978	169.295	81.9569	153.252	1.37344	5.42787	3.84819	1.32602	1.40244	0	349.568	0.19564	0	0	0	0	0	0	0	0	0	9.49181	NA
NonamEVm015462t1	34.61	6.31	1.57879	8.44e-07	9.61e-05	0	0	0	0	8.29137	0	7.03966	11.2827	19.1897	14.8534	5.57505	48.7495	142.667	25.5644	28.5458	0	0	36.9054	41.4608	180.748	108.042	82.5703	Pro-resilin
NonamEVm015632t1	116.72	21.11	2.13657	1.5e-23	5.61e-20	0	0	0	0	901.873	1.97706	5.81984	98.5416	130.325	32.4297	0	38.8485	861.918	75.8634	20.1109	78.1641	198.752	80.228	23.597	14.218	0	5.25216	Cuticle protein AM1159
NonamEVm015649t1	498.85	-5.58	1.40245	2.25e-06	0.000208	484.955	2236.56	1471.62	2005.02	40.9136	153.768	62.4617	2.50636	0	40.8156	495.054	29.092	1.99413	3.26095	15.3254	681.831	555.361	322.314	158.373	296.145	1453.19	464.133	NA
NonamEVm015791t1	2923.04	5.76	1.93995	2.57e-05	0.00146	0	5.88513	0	1033.25	3.70134	0	182.772	238.024	539.9	807.861	56.6136	0	495.449	1243.9	200.791	2842.65	241.145	15744.6	3913.89	911.189	30850.7	4994.43	NA
NonamEVm015990t1	5315.3	5.1	1.32812	5.69e-06	0.000453	13.908	98.7945	128.624	125.559	6039.1	551.323	27.0258	2798.44	1593.08	146.334	109.653	1325.44	18609.2	1176.01	2061.5	43928.3	26209.8	2122.71	3304.6	728.297	2124.11	3714.65	Cuticle protein AMP5
NonamEVm016008t1	205.62	-5.58	1.13732	4.53e-08	1.01e-05	1532.05	1122.7	242.943	321.147	24.363	478.728	16.6658	8.34363	21.2716	75.0092	355.536	13.1195	18.6841	8.13841	5.97378	109.565	64.4985	12.4514	53.2548	17.4202	0	21.8169	NA
NonamEVm016096t1	374.87	8.07	1.90406	2.55e-08	6.37e-06	1.73237	3.56943	0	16.1091	8.57492	0	2.51219	31.8842	5.102	7.68067	0.813024	13.9458	6379.85	13.0368	27.5821	657.907	713.02	290.473	29.3635	34.2262	0	9.77251	Cuticle protein AMP4
NonamEVm016121t1	46.06	-3.98	0.957211	4.35e-06	0.00036	424.934	150.673	52.4733	141.598	19.323	51.4351	12.0567	21.4876	25.8052	17.3552	52.1809	5.38626	9.22331	16.4283	7.05305	0	0	0	2.46861	0	0	3.54082	NA
NonamEVm016132t1	35.9	-4.58	1.56425	7.83e-05	0.00344	120.725	89.5295	13.0369	13.6609	13.2454	488.989	14.128	4.91695	10.1282	1.94221	7.58607	1.68351	3.20579	0	0	0	0	0	6.92673	0	0	0	NA
NonamEVm016223t1	5153.79	-4.19	1.49542	0.000128	0.00502	6948.99	3560.18	6908.08	55017.8	319.482	6523	10947.3	895.802	130.217	4097.05	5747.1	324.358	1.16154	39.836	205.898	119.568	41.1817	0	2.84734	778.002	2550.55	8225.01	NA
NonamEVm016257t1	41.12	5.02	2.30913	0.000166	0.00612	0	0	1.44335	0	9.20916	0	57.5556	58.3183	140.81	61.2983	0.397925	41.6755	62.0872	289.639	59.5989	0	0	0	33.8284	51.1205	0	37.5497	NA
NonamEVm016315t1	69.41	-3.28	1.00221	7.23e-05	0.00321	691.797	115.765	76.7289	78.2053	56.5638	107.012	30.147	21.2288	37.104	51.9837	63.4024	17.8054	20.0219	32.4271	16.9711	0	0	40.6148	30.3423	27.6918	0	11.2769	NA
NonamEVm016348t1	2171.88	4.81	1.6365	6.38e-05	0.0029	51.3572	32.9877	49.0381	194.937	7.7159	17.6229	0	48.5708	62.5432	9.77789	4.81802	33.0229	13780	36.9804	126.812	15037.6	13683.2	3637.55	244.241	329.931	295.741	96.967	NA
NonamEVm016365t1	114.57	6.57	2.46501	2.01e-05	0.00119	0	0	0	1.22069	7.91078	0	155.801	256.742	371.149	355.97	0	77.3229	99.9344	209.526	396.033	0	0	13.1954	121.444	137.269	0	316.961	NA
NonamEVm016382t1	2071.84	-6.94	1.26724	3.33e-10	1.47e-07	20722.7	12991.2	1256.4	4043.45	77.8602	429.741	99.522	14.4362	142.794	396.409	2786.61	61.0253	16.3001	67.3239	46.5665	1085.84	232.629	427.114	449.789	15.1936	68.11	149.546	NA
NonamEVm016383t1	82.5	-5.81	1.69548	8.95e-06	0.00065	1037.31	294.913	20.3349	148.005	0.30827	77.5781	4.99495	0	2.53233	1.29388	120.937	2.79684	0.913127	3.49035	2.56125	62.566	0	24.8348	9.68852	0	0	0	NA
NonamEVm016388t1	43.52	-5.25	1.0717	6.67e-08	1.29e-05	306.072	391.563	42.1373	79.5862	9.86007	11.9497	7.49196	2.94321	14.6765	25.2033	48.649	3.06995	3.64492	7.55299	1.70572	0	0	0	1.38245	0	0	0	NA
NonamEVm016491t1	149.93	-5.03	1.09606	3.65e-07	5.02e-05	1296.58	906.696	143.954	247.333	31.9633	180.176	21.6612	14.0215	57.7502	63.4779	153.283	17.9137	15.899	17.8031	6.29758	99.0734	0	0	16.0806	2.22235	0	6.37927	NA
NonamEVm016496t1	60.94	-5.02	1.47988	2.09e-05	0.00122	792.438	50.6511	11.6041	217.339	1.23123	0	84.3769	55.4091	14.159	31.0032	9.56403	6.42119	0.455749	0.580772	6.81906	0	0	0	0.690912	8.70332	42.9138	6.23818	NA
NonamEVm016577t1	180.42	6.53	2.23159	1.26e-05	0.000832	0	0	1.43415	0	0	0	23.1399	278.379	30.9864	2.6082	0.401398	169.783	472.338	260.913	248.532	0	1114.21	102.981	217.238	374.486	20.2506	651.523	Actin, alpha cardiac muscle 2
NonamEVm016713t1	834.34	-3.13	0.691665	1.24e-06	0.000133	3002.22	2172.82	1324.65	1074.04	467.95	3253.57	183.368	422.135	460.387	372.96	706.972	189.021	196.758	197.793	268.407	667.889	636.338	395.723	488.743	454.802	617.648	801.367	Selenoprotein W
NonamEVm016799t1	1202.21	4.46	1.42642	5.79e-05	0.00271	0	21.205	72.0034	84.4167	11.7331	3.90132	24.4661	124.711	37.6736	5.22548	0	315.916	4115.27	165.943	1295.99	8707.67	3958.52	1181.72	2504.18	364.996	1519.06	1934.08	Cuticle protein AMP1B
NonamEVm016833t1	54.45	7.14	2.01409	1.3e-06	0.000136	0	0	0	0	64.9265	11.8364	6.63754	16.2277	24.7983	4.53125	9.97802	45.2387	529.667	15.7255	73.0255	280.816	0	98.5269	15.9315	0	0	0	NA
NonamEVm016853t1	42.39	-8.11	2.25994	3.38e-07	4.73e-05	171.109	126.377	0	84.6834	41.342	73.8568	28.7627	0	53.7053	70.5046	126.535	0	0	0	0	0	0	124.603	31.1321	0	0	0	SWI/SNF nucleosome remodeling complex component
NonamEVm016977t1	114.45	-5.33	1.83932	4.38e-05	0.0022	678.74	1133.02	66.9315	161.781	6.47316	279.512	3.33268	0	2.53054	4.52195	163.861	9.47318	6.36848	0.580664	0	0	0	0	0.690889	0	0	0	NA
NonamEVm017059t1	46.9	-6.69	1.61818	2.97e-07	4.25e-05	410.573	110.763	34.2488	10.509	13.1036	313.568	3.38162	2.07959	17.3613	12.4554	39.3073	0.594445	1.77961	0	0	0	0	0	6.35929	6.67101	0	49.1211	NA
NonamEVm017077t1	1075.07	-5.83	1.06918	1.91e-09	7.25e-07	8148.69	6005.32	1167.46	1733.05	128.014	1784.01	64.9463	53.6178	134.849	222.2	1988.01	71.501	48.5157	64.0879	32.912	281.662	77.9345	496.075	418.595	147.36	131.227	451.396	Profilin
NonamEVm017083t1	38.39	-4.25	1.49584	0.000114	0.00458	238.392	153.577	21.6976	18.5821	16.8016	256.633	3.4203	2.20209	5.67606	10.9707	70.3548	2.92667	1.02375	9.32449	1.27586	0	0	0	6.2054	13.1164	0	12.459	NA
NonamEVm017208t1	25.26	-4.72	2.00353	0.000175	0.00635	76.4438	67.1908	0	9.9425	4.92911	131.131	12.8936	4.41857	10.1236	18.1061	42.2867	1.11859	0.456497	0	0	171.933	0	0	4.84218	0	0	0	NA
NonamEVm017216t1	302.72	-2.12	0.676973	0.000121	0.00485	1243.86	486.447	247.42	422.036	273.846	335.433	316.718	202.112	195.965	315.433	298.785	74.7339	67.835	191.16	184.267	281.765	82.3896	230.571	297.957	237.218	427.924	245.901	Cyclin G
NonamEVm017273t1	125.86	-4.64	1.54548	6.47e-05	0.00293	894.652	528.744	83.4612	124.089	8.64325	42.8582	5.80225	4.96977	8.65414	41.1549	656.768	10.2988	3.73363	12.3606	6.03045	0	220.071	24.3342	20.2898	1.10305	0	70.8392	NA
NonamEVm017319t1	4523.09	-5.5	1.34055	1.55e-06	0.000155	20300.1	14014	4670.9	3686.77	625.036	30727.8	168.115	235.901	114.993	415.335	15868.6	70.9402	66.4231	69.1639	320.362	102.485	1568.89	216.885	580.932	444.28	2654.08	2586.08	NA
NonamEVm017343t1	573.38	-6.44	1.50659	2.44e-07	3.71e-05	7852.06	2092.94	119.236	651.84	14.4838	165.537	14.5739	3.43213	16.1934	78.8136	302.193	22.3015	3.64093	29.6171	2.98408	938.505	0	236.542	54.5842	7.61328	0	7.26141	NA
NonamEVm017431t1	526.48	23.31	2.68653	9.65e-19	1.38e-15	0	0	0	16.1419	0.617181	0	0	0	1.01662	0	0	14.2165	5717.33	0	2.14813	2547.85	2342.53	764.954	68.3408	58.2456	40.6374	8.50993	NA
NonamEVm017524t1	44.59	-6.4	1.9222	5.85e-06	0.000461	352.474	276.123	94.6693	106.456	0	26.1166	3.56405	1.10285	0.79063	7.58431	105.146	0	0	1.82121	0.954163	0	0	0	0	0	0	4.10648	NA
NonamEVm017597t1	57.23	-22.56	2.81793	2.88e-16	3.1e-13	0	0	111.064	3.8556	0	0	0.860031	0	0	0	1.6528	0	0	0	0	0	0	6.39462	12.6049	467.392	610.013	45.2714	NA
NonamEVm017607t1	23.42	4.85	2.33474	0.000218	0.00752	0	0	0	0	2.76671	0	29.8771	38.7166	62.6405	45.1817	0	27.9267	42.3951	130.603	11.4987	0	0	30.9174	5.52392	43.4984	0	43.701	NA
NonamEVm017745t1	100.53	-4.05	1.17714	3.64e-05	0.00195	1130.05	480.131	54.5747	219.615	12.4495	14.9505	20.1513	21.2157	11.4153	38.9313	81.9545	11.0288	41.1517	15.8417	12.8278	0	0	23.3319	19.0038	0	0	2.93369	NA
NonamEVm017868t1	1483.59	-6.49	1.3666	2.82e-08	6.94e-06	11611.2	10070.3	1246.11	2938.42	65.3763	198.412	48.1495	39.0456	76.1572	187.288	4035.59	48.1711	32.3668	40.978	30.0223	140.621	415.98	0	240.811	151.331	406.286	616.357	NA
NonamEVm017889t1	725.57	-6.03	1.02118	1.08e-10	5.45e-08	7544.32	2477.58	822.566	1349.5	114.144	467.923	55.3489	49.2434	64.9185	110.873	813.732	43.5558	28.4367	29.162	38.0721	782.276	71.6234	377.521	294.135	71.0379	174.165	182.319	NA
NonamEVm017924t1	59.73	-3.33	1.30962	0.000311	0.00997	21.0345	19.9743	82.2616	35.8635	2.77571	90.1481	3.28187	4.57015	3.07837	7.30824	15.0796	3.54407	1.44551	1.20113	3.06378	438.568	349.285	106.654	4.27429	33.8224	42.7862	44.0519	Cytochrome c oxidase subunit 1
NonamEVm017928t1	252.48	21.8	4.31974	2.1e-08	5.43e-06	0	0	0	0	0	0	0	0	0	0	1.64098	0	4460.26	0	0	126.132	743.32	107.448	7.88846	98.7306	0	9.08559	NA
NonamEVm018029t1	497.58	-4.72	1.13957	2.9e-06	0.000257	4245.63	1550.32	839.323	339.812	323.516	600.85	62.4107	9.60696	161.527	297.833	868.239	103.623	39.9217	24.9678	29.2885	517.363	0	33.05	238.29	189.828	222.096	249.215	NA
NonamEVm018047t1	1337.44	-6.7	1.48174	5.78e-08	1.13e-05	8992.09	8443.24	1722	3132.89	76.0736	193.214	53.4171	21.8286	35.2065	267.836	4501.47	47.5037	20.0364	18.2162	11.0602	241.583	0	59.2535	199.874	59.3772	155.685	1171.89	NA
NonamEVm018071t1	287.11	-4.06	1.26967	6.37e-05	0.0029	700.758	1380.82	457.363	949.841	13.2502	169.023	634.527	327.453	98.7192	573.588	831.837	17.8912	10.9523	22.0958	62.7236	0	0	43.4461	6.91734	15.2493	0	0	NA
NonamEVm018187t1	1064.08	-6.27	1.62027	1.41e-06	0.000145	850.826	17.9738	1507.68	817.578	0.939901	212.933	1.24443	0	10.5709	0	0	4.45697	0	4.7375	4.34365	111.23	125.328	94.3228	50.0547	2993.87	9304.01	7297.61	NA
NonamEVm018201t1	436.31	-4.61	1.164	5.86e-06	0.000461	1897.54	4098.91	645.181	791.398	28.0669	413.89	8.74527	45.704	69.9298	185.779	374.196	58.7734	40.2046	93.713	17.939	31.2983	116.186	329.173	190.421	97.0439	0	64.6297	NA
NonamEVm018451t1	66.12	4.07	1.47292	0.000147	0.00561	0	0	5.05141	11.934	12.999	0	8.96535	29.0555	58.6916	33.8555	3.84801	34.6142	53.6056	101.649	63.116	306.463	0	119.481	75.1967	35.4096	246.532	254.216	NA
NonamEVm018609t1	38.96	3.82	1.38611	0.000171	0.00623	0	4.7075	2.88012	7.44164	109.778	0	24.8671	124.873	64.5367	26.7167	10.0325	77.7505	35.3174	46.3628	128.911	46.8485	89.7095	18.2991	36.9769	0	0	1.06666	NA
NonamEVm018652t1	5673.68	-6.17	1.36838	1.36e-07	2.32e-05	10841.8	3332.42	3865.06	30054.5	25.2945	1867.11	105.742	33.4529	44.1065	40.8156	55.5478	98.9995	0.457783	9.32279	38.8989	2378.45	1569.16	31377.4	8961.1	11932	3767.02	14422.2	NA
NonamEVm018764t1	462.67	-3.55	1.0751	6.28e-05	0.00288	1431.04	1340.6	482.542	1422.74	171.151	1375.98	599.809	180.837	75.2059	325.123	1148.42	135.232	9.2913	15.8431	89.7997	140.556	38.1201	0	88.591	281.455	392.432	433.9	Single insulin-like growth factor-binding domain protein-2
NonamEVm018806t1	2851.12	6.94	1.84832	8.53e-07	9.61e-05	32.0433	14.1651	23.2498	250.152	3.70207	47.744	259.893	10.8171	18.2488	143.12	35.1572	0.280089	42727	0	17.5194	12631.3	1447.03	3359.19	1099.42	96.0048	301.023	207.631	NA
NonamEVm018854t1	5523.04	5.12	2.04902	9.97e-05	0.00414	11.3993	0.987061	8.95479	5.21104	2.99737	0	0	3.72292	0	0.551857	26.4768	11.2674	4682.25	0	0.363913	12272.8	78618.7	19776.6	4621.66	584.607	447.664	430.668	NA
NonamEVm019117t1	20.61	-8.39	2.09724	4.75e-08	1.03e-05	232.482	46.0423	11.5629	21.1516	3.09268	98.122	0.415853	0.496595	2.03804	2.61261	22.9313	0	0	0	0	0	0	6.12706	6.29287	0	0	0	NA
NonamEVm019125t1	286.97	-3.8	1.16929	6.36e-05	0.0029	1400.41	1063.82	543.493	223.972	28.8909	90.8943	48.9046	18.5369	44.5743	82.7827	771.4	18.7533	69.9579	39.3614	50.1398	200.276	726.662	6.03766	68.001	138.545	169.121	508.715	NA
NonamEVm019257t1	108.65	-5.8	1.25941	1.4e-07	2.35e-05	1194.05	599.993	79.0512	170.582	11.535	106.372	8.0257	12.6723	19.1419	14.1983	107.055	6.9315	2.13293	8.01575	5.20321	0	0	2.05011	35.0691	0	0	8.26741	NA
NonamEVm019262t1	57.53	-3.8	1.01314	1.76e-05	0.00106	508.335	368.015	16.9451	50.2903	13.7656	43.4018	13.4696	31.9169	15.7154	11.1109	54.1966	8.38288	21.6922	24.199	5.17054	0	0	23.6468	18.9354	11.0805	2.23222	23.0671	NA
NonamEVm019302t1	643.84	22.69	2.17588	4.82e-26	4.15e-22	0	0	0	0	969.452	0	420.144	4156.78	2123.5	1268.32	5.19871	480.57	292.409	1709.27	964.395	0	186.004	0	201.663	1039.11	11.2299	336.327	Actin, muscle-type A2
NonamEVm019319t1	2155.32	-5.71	1.31463	4.79e-07	6.3e-05	13471.8	12945.8	1784.89	3706.28	118.655	330.055	61.6246	21.5187	77.7517	440.253	6569.88	76.8598	135.651	98.7534	25.5944	1997.75	3032.65	618.886	299.428	206.574	158.381	1237.9	NA
NonamEVm019352t1	31.64	6.57	1.4268	5.03e-08	1.05e-05	0	0	0	11.1373	62.0595	17.6756	39.3202	54.0784	92.0047	49.8192	114.861	40.5146	109.736	64.0502	28.1675	0	0	6.13073	3.46195	0	0	3.15155	NA
NonamEVm019382t1	269.49	-4.87	1.30411	9.75e-06	0.000699	1888.86	1253.66	716.93	647.819	25.2562	96.001	14.9633	26.8539	34.8036	217.579	519.505	28.5784	28.3309	22.0103	9.00875	239.818	2.96133	0	99.4214	26.2023	0	30.1862	NA
NonamEVm019386t1	260.84	-6.54	1.60869	4.94e-07	6.37e-05	3885.35	489.924	340.151	392.074	13.8824	131.397	4.16563	4.91487	23.8209	81.5713	247.238	0	1.8274	13.971	7.26195	0	31.9915	0	40.8583	0	0	28.1414	NA
NonamEVm019456t1	440.2	7.43	2.03019	6.07e-07	7.57e-05	0	2.36015	1.45513	3.73295	52.3899	0	765.202	1188.75	1019.48	865.887	0	641.141	601.339	1738.21	916.986	31.2897	0	853.999	447.481	267.36	190.095	97.34	NA
NonamEVm019594t1	139.02	19.94	5.63399	8.79e-07	9.82e-05	0	0	0	0	0	0	0	0	0	0	0	0.295123	2444.59	0	0	173.984	252.928	108.764	4.29714	73.5508	0	0	NA
NonamEVm019713t1	30.53	-5.23	1.39729	6.69e-06	0.000512	404.832	122.051	14.3032	73.8721	0.926424	17.4796	7.4072	1.00999	1.51246	3.87758	11.7169	1.13656	0	5.23744	2.1781	0	0	0	4.15094	0	0	0	NA
NonamEVm019771t1	30.75	-3.9	1.14088	4.14e-05	0.0021	330.308	101.308	18.8397	29.806	15.3979	75.3191	21.6097	4.42121	4.04936	6.46903	34.7141	7.283	2.28613	9.30933	6.4023	0	0	0	8.99712	0	0	0	NA
NonamEVm019796t1	155.42	5.12	1.93162	8.07e-05	0.00352	0	0	7.26137	44.7402	27.0973	0	366.475	217.622	272.587	597.952	2.78925	166.731	204.83	844.092	164.476	0	0	18.642	109.127	255.521	0	119.348	NA
NonamEVm019835t1	695.42	8.79	2.31863	7.44e-08	1.39e-05	0	0	1.20138	0	510.202	0	2472.28	3146.05	2000.01	2284.34	4.60925	379.449	249.792	1302.71	1204.65	64.8932	222.135	15.3399	247.936	900.47	125.669	167.596	Actin
NonamEVm019872t1	35.11	4.91	1.64642	5.41e-05	0.00258	0	0	1.41942	8.58899	8.25047	7.65415	16.3754	11.3595	42.3916	23.9914	3.19231	44.755	35.7946	42.1009	41.9097	0	0	0	96.6147	184.242	82.556	121.333	NA
NonamEVm019923t1	84.8	6.42	2.02139	8.37e-06	0.000618	0	0	1.43545	29.6244	21.4658	0	93.6822	75.2158	112.092	104.134	2.39118	99.8016	196.435	447.77	104.937	0	0	134.091	266.521	157.073	0	18.9697	NA
NonamEVm019971t1	5765.98	-6.02	1.36562	2.46e-07	3.71e-05	40339.7	34407.1	4799.92	5437.09	269.07	10600.9	173.547	146.334	136.477	782.97	16438	272.87	163.428	157.561	126.68	2206.33	6602.73	105.162	426.162	613.482	165.133	2480.87	NA
NonamEVm020125t1	45.5	-4.04	0.879382	7.4e-07	8.9e-05	347.111	100.787	20.0932	108.692	23.6367	50.6873	70.5991	22.1718	39.9465	107.582	47.1074	4.24313	7.84698	7.58617	8.97527	15.5487	0	0	5.54991	5.46647	0	7.40861	NA
NonamEVm020150t1	98.33	-5.22	1.475	1.22e-05	0.000814	62.0517	17.6759	297.636	211.146	1.23406	0	3.73776	0	2.03163	9.75747	40.0845	1.13351	0.462421	1.75665	2.14512	31.264	41.6738	153.443	59.1754	213.891	555.538	457.475	Phosphoenolpyruvate carboxykinase [GTP], mitochondrial
NonamEVm020154t1	602.07	-2.48	0.80146	0.000126	0.00496	2444.88	1652.11	933.793	1185.87	230.197	1010.6	476.068	161.914	310.706	481.419	908.737	229.035	170.986	251.405	326.14	735.12	67.6006	375.851	406.031	308.961	255.423	322.631	NA
NonamEVm020160t1	1897.38	-5.63	1.48152	3.78e-06	0.000324	8418.06	9586.26	548.76	3266.46	126.799	15819.6	72.3431	60.6877	63.9499	133.777	2743.18	66.0286	52.9575	49.6717	26.1322	0	245.587	80.1354	174.429	27.3793	0	180.121	Astakine
NonamEVm020409t1	160.89	-4.52	1.71038	0.000133	0.0052	104.587	309.155	289.926	277.523	9.33622	20.5957	15.8371	0	0	8.96645	64.2907	5.33958	5.86341	0	2.95796	1387.68	372.949	5.35721	29.9777	74.6095	373.633	180.942	NA
NonamEVm020509t1	22.6	-8.89	2.06074	6.54e-09	2.05e-06	292.799	42.3778	18.637	29.7638	1.85375	71.4162	2.0682	1.99994	1.53149	3.93714	29.4746	0	0	0	0	0	0	0	1.40714	0	0	0	NA
NonamEVm020529t1	103.19	-8.24	3.60366	1.28e-05	0.000837	666.248	356.219	0	180.256	0	92.7055	0	81.3218	21.8102	99.0015	86.9997	0	0	0	0	108.856	0	0	0	103.475	336.755	136.488	NA
NonamEVm020531t1	25.1	-3.36	1.13336	0.00014	0.00543	126.229	71.4151	41.3103	67.8347	15.6744	76.6013	32.4827	19.9223	9.65422	35.2878	27.7359	6.04562	0	7.07542	7.32657	0	0	0	7.70875	0	0	0	NA
NonamEVm020573t1	36.47	-4.39	1.52162	9.54e-05	0.00399	89.8678	12.9044	167.83	243.542	0.307451	3.88764	66.493	10.8801	1.01371	42.9137	34.8309	1.99138	0.928281	0	4.2875	62.2704	0	12.1395	20.1919	7.68294	4.49554	13.8636	NA
NonamEVm020591t1	952.49	4.51	1.07264	2.66e-06	0.000238	0	1.17775	23.1179	38.4839	36.3763	0	51.4801	217.686	204.472	127.318	29.626	227.301	429.97	289.988	224.081	437.432	259.719	159.716	1566.22	7347.32	2069.89	7213.34	Cytochrome c
NonamEVm020626t1	227.46	6.12	1.89477	1.02e-05	0.000722	0	0	5.78817	128.948	71.0159	0	21.5749	461.854	155.62	9.03947	1735.68	914.812	3.64987	700.91	628.8	124.759	0	0	8.97985	8.70388	0	23.9573	NA
NonamEVm020731t1	29.29	-8.12	2.23281	2.8e-07	4.09e-05	396.253	54.268	31.6449	3.72902	2.47611	95.0733	1.24441	0	0	13.1309	16.1626	0	0	0	0.432998	0	0	24.2479	3.5185	2.2204	0	0	NA
NonamEVm020822t1	60.48	-4.34	1.70076	0.000176	0.00638	140.082	87.1049	63.638	18.6128	20.9369	764.105	9.54779	3.44394	19.7487	16.839	87.0552	4.4974	0	1.74814	0.427271	0	0	24.6527	0.69302	6.55254	0	60.8316	Anti-lipopolysaccharide factor
NonamEVm020866t1	27.02	-4.05	1.32747	8.69e-05	0.00372	165.363	103.735	10.1613	63.3857	7.39279	147.135	5.82342	7.36045	15.6875	20.0373	28.7128	3.91127	0	2.90594	5.11798	0	0	0	5.53126	0	0	2.08082	NA
NonamEVm020885t1	111.65	20.49	2.65153	2.82e-15	2.56e-12	0	0	0	0	15.3977	11.9457	89.026	3.43147	11.1273	26.4787	0	7.52943	698.827	9.28982	14.4894	0	0	1379.52	185.127	0	0	4.15214	NA
NonamEVm020886t1	663.02	-3.96	1.04684	1.52e-05	0.000953	4596.09	2374.09	448.052	862.618	132.303	3330.93	226.238	99.6384	177.775	314.278	1104.16	84.8664	77.4782	118.014	146.791	0	41.0325	143.182	125.882	21.7766	52.0673	109.098	NA
NonamEVm020996t1	193.07	-6.38	1.22812	3.56e-09	1.23e-06	913.291	1623.63	274.516	246.021	8.08664	27.4856	4.8261	7.63476	6.66936	52.5607	361.509	0.635229	6.83252	8.83749	7.1946	35.4731	138.387	18.7525	45.2962	79.2824	161.092	219.6	NA
NonamEVm021012t1	106.31	-3.57	1.23832	0.00015	0.00568	754.443	127.596	62.9966	307.171	11.3505	56.2857	455.853	125.292	43.9922	174.468	17.9721	16.1691	12.0333	11.1001	23.9503	0	0	0	15.2788	19.7045	80.7477	22.3235	NA
NonamEVm021116t1	78.4	-22.29	5.06118	1.56e-07	2.56e-05	0	0	385.524	0	0	0	0	0	0	1.2913	0	0	0	0	0	0	0	0	60.7782	704.756	510.11	62.3859	NA
NonamEVm021118t1	119.57	-5.1	1.36103	7.6e-06	0.000568	570.39	612.644	252.392	158.997	30.7893	581.966	25.7741	12.7559	31.3638	53.6356	190.167	12.853	5.0173	0	7.67505	0	0	0	40.0934	6.53127	0	37.4663	NA
NonamEVm021397t1	123.12	-3.93	1.11416	3.11e-05	0.00171	140.375	473.642	335.058	322.974	4.31086	166.814	461.034	187.942	79.4312	281.153	198.57	10.6213	3.19389	8.13684	31.1319	0	0	0	0	0	0	4.16465	Neuroparsin-A
NonamEVm021491t1	1980.36	-4.13	1.32708	7.29e-05	0.00323	198.272	44.2965	222.422	516.765	0.374298	21.5765	44.1364	12.0891	7.06686	24.9249	1.3256	5.70522	1.29002	6.55404	5.24478	2579.82	23801.4	1383.13	1594.04	3318.89	4421.04	5357.59	NA
NonamEVm021578t1	68.43	-5.2	1.41888	8.83e-06	0.000644	563.538	288.054	51.1964	102.234	4.28746	146.566	10.834	0	4.60649	22.6167	99.2229	6.98107	0.838858	3.71761	2.48046	99.24	0	41.9262	16.7138	18.285	0	22.0877	Tigger transposable element-derived protein 1
NonamEVm021663t1	57.16	-4.97	1.33283	9.03e-06	0.000653	566.807	117.814	40.6119	53.4116	17.8578	345.552	11.6395	4.90646	13.6588	10.34	45.4507	3.35347	0.456185	9.87915	1.27924	0	0	0	6.2218	0	0	8.32747	NA
NonamEVm021671t1	536.38	4.6	1.27118	1.62e-05	0.000994	7.1243	14.1655	23.2689	36.0946	1568.53	39.8678	706.955	1255.91	3277.31	1765.8	37.9162	139.947	138.631	865.299	1603.1	156.514	5.84879	99.5471	37.3595	7.62439	0	13.518	NA
NonamEVm021764t1	69.94	-5.66	1.6079	8.09e-06	0.0006	474.089	487.3	21.2986	74.0067	14.1	56.4913	0.649749	0.847324	3.48556	5.57585	348.407	3.41567	3.16471	1.00357	1.10341	0	0	0	15.0556	2.82084	0	25.8621	NA
NonamEVm021789t1	28.9	4.71	2.08781	0.0002	0.00704	0	0	0	6.15476	1.22577	0	20.6194	12.7727	34.3106	40.6841	2.3895	19.9926	41.3653	44.7951	28.1327	0	0	85.2756	165.324	96.9585	0	35.796	NA
NonamEVm022221t1	639.06	-5.47	1.32603	1.48e-06	0.00015	7328.15	3734.47	396.141	964.55	35.0598	129.396	30.2245	29.0715	53.6657	155.607	764.726	28.8044	42.3955	68.2831	21.3811	93.4998	0	12.2408	28.4493	18.5853	0	124.512	NA
NonamEVm022396t1	1204.86	-5.04	1.0003	4.19e-08	9.48e-06	7323.97	3744.51	1693.85	880.742	229.963	392.549	70.5981	114.875	278.071	246.22	2021.35	71.0305	118.222	63.3368	86.7745	2611.34	4869.88	330.893	337.45	277.965	83.569	659.853	NA
NonamEVm022400t1	4648.27	-5.15	1.32296	4.68e-06	0.000385	17689.7	22426.1	3107.46	3889.85	184.902	35641.1	709.727	171.696	88.2224	622.295	14229.4	212.631	56.5677	143.41	364.675	941.939	878.971	148.057	125.788	162.954	136.088	330.33	NA
NonamEVm022489t1	80.41	-4.81	0.9198	1.94e-08	5.2e-06	697.93	397.579	59.6144	124.394	16.9491	81.7613	44.1369	19.6132	17.7118	36.1782	110.037	10.3156	8.19297	10.4536	9.80521	0	0	31.1203	26.9479	16.3152	40.7217	9.33747	NA
NonamEVm022555t1	96.62	-5.09	1.21756	1.81e-06	0.000178	698.372	384.456	95.7009	28.4862	6.17617	185.758	7.839	12.0426	19.4168	23.0265	112.843	5.22653	9.47273	4.75092	5.20596	0	224.287	41.94	43.0526	65.7617	0	151.806	NA
NonamEVm022556t1	46.19	19.27	3.2348	2.14e-10	1.02e-07	0	0	0	0	0.934551	5.84914	1.25185	0	0	2.64464	159.901	2.03513	399.667	0	0	126.05	265.561	48.7397	3.54382	0	0	0	NA
NonamEVm022563t1	117.66	-3.55	1.1576	0.000106	0.00433	1191.18	413.417	54.0127	258.368	20.8459	156.759	21.7415	27.8075	41.0457	39.096	102.214	15.2098	26.6765	53.4953	25.3545	46.5119	0	17.9274	47.5135	11.0279	0	18.4205	NA
NonamEVm022863t1	37.55	-5.18	1.47687	1.35e-05	0.000871	304.546	183.396	28.8804	47.0922	2.46043	70.9308	0.41456	3.93332	6.07075	7.7661	47.0824	0.562108	4.12818	0	2.9886	0	0	0	34.6266	3.27416	65.3543	12.5875	NA
NonamEVm022872t1	62.45	4.74	2.55122	0.000295	0.00959	0	0	0	0	11.9719	0	160.925	237.35	331.517	310.975	0	0.585036	82.1155	95.6272	97.6421	0	0	25.6766	11.542	5.6836	0	2.18267	NA
NonamEVm023235t1	636.25	5.43	1.87572	4.05e-05	0.00207	0	5.88395	4.30192	0	17.6016	13.5271	2.8954	433.878	47.4362	0	10351.8	1478.04	174.848	217.529	485.883	281.138	362.107	90.5788	1.40525	25.4992	0	3.25818	NA
NonamEVm023301t1	45.48	-5.28	1.94146	6.22e-05	0.00287	752.862	0	120.837	19.8404	31.7663	19.4872	12.0124	0	0.508503	25.4435	10.8454	2.28424	0	0	4.73205	0	0	0	0	0	0	0	NA
NonamEVm023327t1	47.33	-7.96	1.94551	5.68e-08	1.12e-05	658.481	100.047	10.0948	84.3565	3.69902	82.3295	3.31777	0	2.03059	16.2614	6.41179	0.567416	0	0.585618	0	31.2308	0	0	41.7733	0	0	0	NA
NonamEVm023349t1	214.21	-2.64	0.780064	6.26e-05	0.00288	1425.97	461.102	170.872	152.904	132.065	240.929	278.184	237.867	132.998	216.945	252.667	62.0951	18.4249	129.174	153.824	125.13	143.929	61.6456	104.262	98.5853	81.38	31.6091	NA
NonamEVm023393t1	400.37	6.58	2.00452	5.32e-06	0.000428	0	0	5.79502	54.6091	120.311	0	1026.7	436.133	1177.17	984.665	0	352.833	699.622	1890.76	510.715	0	0	309.406	429.232	492.045	74.4841	243.766	NA
NonamEVm023445t1	520.14	9.11	2.26984	2.12e-08	5.43e-06	0	0	0	113.15	99.7984	0	462.827	546.405	525.016	266.667	1.59389	543.843	452.127	546.76	607.166	125.076	0	24.8898	839.749	3190.45	110.806	2986.79	NA
NonamEVm023465t1	2467.49	-4.76	1.30377	1.34e-05	0.000867	9473.93	10810.1	3569.92	7378.6	24.9894	1063.14	642.943	558.109	267.936	1278.99	16254.3	26.5416	39.3108	88.8598	436.777	0	3.41019	50.0158	39.3612	599.4	965.059	712.962	NA
NonamEVm023520t1	698.3	20.99	2.0434	2.92e-25	1.67e-21	0	0	0	96.7266	0	0	151.259	268.762	108.1	129.106	50.0678	211.214	175.029	290.919	278.829	308.419	0	0	1429.52	3205.51	1919.1	6740.1	NA
NonamEVm023716t1	78.82	-4.26	1.07452	7.24e-06	0.000549	559.862	249.813	64.2256	79.7089	15.3176	59.549	15.7867	9.76105	4.57279	31.0814	124.555	12.5006	7.18805	13.364	5.97054	23.4665	134.956	0	31.9136	40.4867	208.272	41.6301	NA
NonamEVm023749t1	20752.9	-6.1	1.20433	1.04e-08	2.98e-06	130079	122319	23342.4	35760.4	642.33	2546.96	1257.65	897.852	996.79	4381.75	54198.4	694.561	514.223	1092.84	525.726	6786.46	20127	2022.01	6664.73	7304.62	9055.62	25353.1	NA
NonamEVm023903t1	112.45	4.39	1.19823	1.7e-05	0.00103	0	18.9495	11.5401	38.2471	58.3701	8.97985	58.2681	86.1278	69.7005	51.9636	386.755	67.2448	1143.64	83.7841	213.952	0	133.723	21.0243	20.0685	0	0	1.60579	NA
NonamEVm024090t1	162.58	-3.94	1.60143	0.000263	0.00881	293.222	818.017	296.287	221.58	9.84249	789.503	26.0723	10.8526	3.03906	16.8731	446.505	20.2326	4.15621	14.6066	11.5557	0	192.596	0	120.864	58.0112	29.2592	193.663	NA
NonamEVm024114t1	90.55	6.24	2.1104	1.61e-05	0.000989	0	0	0	0	669.388	184.125	105.699	133.91	251.669	206.571	0	112.583	27.9479	62.7441	228.658	0	0	0	3.45409	2.17708	0	3.14504	NA
NonamEVm024203t1	57.85	5.44	2.28113	8.82e-05	0.00374	0	0	1.4521	1.24249	34.785	0	77.771	135.705	206.768	100.046	0	91.3911	62.319	311.599	125.647	0	0	0	40.7315	27.1696	0	55.9989	NA
NonamEVm024206t1	90.29	-5.4	1.26185	8.94e-07	9.92e-05	1252.82	91.9821	13.0792	313.337	4.62071	33.878	104.466	73.5317	22.7648	33.585	14.3483	10.3147	3.18585	0.580616	7.24531	0	0	0	3.45397	1.08744	0	2.075	NA
NonamEVm024294t1	35.09	-7.13	1.75711	2.15e-07	3.36e-05	303.394	39.5353	24.452	32.0046	9.93141	292.036	3.51808	0.356773	15.9745	13.6132	2.60328	0.409094	0.638002	0	0	0	0	16.4303	8.18536	0	0	8.8946	NA
NonamEVm024571t1	36.15	-5.4	1.47775	7.43e-06	0.000561	304.149	120.135	37.4177	64.5368	1.54373	29.2222	6.21757	4.97113	3.05508	8.49437	117.466	1.71705	1.40057	0	2.58514	0	53.6535	0	23.7944	0	0	15.0327	NA
NonamEVm024727t1	40.94	19.89	2.1613	1.07e-20	2.05e-17	0	0	0	0	40.5996	0	91.3981	29.3826	179.345	79.3515	3.58265	61.861	52.314	210.548	73.6461	0	0	0	62.1048	0	0	16.5981	NA
NonamEVm024728t1	63.89	-21.83	4.90486	1.35e-07	2.32e-05	0	166.429	95.971	169.255	0	0	0	0	70.4055	0	9.57851	0	0	0	0	422.55	0	0	351.45	0	119.958	0	NA
NonamEVm024943t1	106.41	-5.5	1.1016	3.17e-08	7.58e-06	849.284	684.876	109.925	194.764	17.8502	189.649	9.13089	9.3395	16.1944	46.5939	144.059	7.29795	10.5368	6.40414	4.26943	0	0	6.16645	11.0789	14.1835	0	9.42329	Solute carrier family 12 member 8
NonamEVm025224t1	64.18	-2.95	0.985443	0.000146	0.00558	329.46	181.128	80.8921	115.304	29.5405	122.175	56.8189	20.6644	26.3219	79.6552	67.0749	9.84584	19.2821	18.6474	27.342	77.996	0	73.8142	49.2032	13.1057	0	13.6501	NA
NonamEVm025260t1	304.41	5.22	1.77509	4.5e-05	0.00225	0	15.3006	5.79072	0	575.735	43.5478	20.3443	263.166	185.128	42.6704	1758.52	2569.97	9.14206	416.95	659.891	0	0	80.3213	31.1264	14.1648	0	5.21979	NA
NonamEVm025444t1	39.4	19.87	2.22236	1.15e-19	1.79e-16	0	0	0	0	4.55377	0	54.1586	55.3356	102.202	122.224	0	51.0877	98.9807	187.297	66.6038	0	0	0	61.3435	57.6157	0	5.30441	NA
NonamEVm025543t1	366.98	-4.71	1.73938	0.000103	0.00425	693.392	1873.82	225.676	1347.52	27.3975	2200.95	398.523	32.9441	5.56829	470.606	380.406	17.971	5.49951	3.49423	18.7909	0	0	30.8356	213.333	0	0	126.744	NA
NonamEVm025551t1	2799.18	24.56	4.57938	6.68e-09	2.05e-06	0	0	0	9.96362	0	0	0	0.986172	0	0	653.454	0	55574.9	0	0	1770.32	2857.67	669.318	38.8996	0	0	6.29501	NA
NonamEVm025741t1	313.11	22.16	3.94137	1.94e-09	7.25e-07	0	0	0	0	0	0	0	0	0	0	0	0	4511.43	0	0	534.071	1385.52	195.828	32.3333	124.106	97.521	7.54232	NA
NonamEVm025861t1	37.11	-3.75	1.1613	6.89e-05	0.00309	56.6532	173.947	62.0918	37.1693	21.521	301.558	30.6718	4.42197	16.6866	23.2838	19.939	6.17658	3.20744	4.07354	4.69355	0	0	0	33.2201	8.72519	0	8.38129	NA
NonamEVm025938t1	69.43	4.98	2.49846	0.00021	0.00733	0	0	0	31.038	2.46154	0	238.506	187.224	222.408	229.191	0	30.9711	37.3499	190.984	38.3401	0	0	62.0017	79.4181	158.758	0	18.7024	NA
NonamEVm026136t1	25.6	-4.08	1.44416	0.000131	0.00515	152.952	102.088	21.2431	39.5683	2.40727	168.149	7.05424	0.941342	5.86606	15.4784	32.9047	5.67304	0.984898	1.11491	2.44989	0	0	0	4.25579	0	0	0	NA
NonamEVm026177t1	21.87	-4.83	1.27556	8.59e-06	0.000631	195.188	95.9643	3.58006	18.3944	6.7987	111.424	8.51912	6.07727	3.16113	6.93102	14.155	1.85648	0	2.39934	2.81327	0	0	0	0	0	0	3.98762	NA
NonamEVm026258t1	34.58	-5.32	1.20248	5.46e-07	6.91e-05	387.193	141.394	23.1892	89.4391	4.00475	27.7445	10.3914	4.42365	4.05099	9.0612	26.7461	1.12137	7.77903	0.582154	0.427029	0	0	18.5572	3.46226	1.09078	0	0	NA
NonamEVm026346t1	56.03	-3.24	0.95756	5.61e-05	0.00264	526.879	215.859	47.9683	46.0174	14.1739	73.7495	26.2269	20.1044	34.4094	54.2679	34.6847	13.3855	17.3001	35.4277	16.6262	0	0	12.4423	22.1117	5.43877	0	15.5677	NA
NonamEVm026450t1	28.63	-5.09	1.41067	1.14e-05	0.000773	185.602	95.6672	27.2151	39.6721	4.01572	106.503	6.30501	2.50161	7.1483	6.56544	31.9071	0	4.24375	1.18461	0	0	0	0	9.15223	20.0001	78.9151	3.2748	NA
NonamEVm026485t1	25.56	9.17	5.47683	3.51e-05	0.00189	0	0	0	270.677	26.3332	0	2.05402	2.96217	0	0	241.963	4.55164	0	0	3.42193	0	0	6.0184	0	0	0	4.27515	NA
NonamEVm026651t1	20.73	-4.65	1.86703	0.000151	0.0057	211.461	117.855	17.4036	55.9136	0.308063	3.96886	2.91057	3.43851	0	0.646918	36.3139	0.279973	2.28504	0	2.56104	0	0	0	0.692073	0	0	0	Nuclear pore complex protein Nup54
NonamEVm026673t1	51.95	-4.26	1.26905	3.93e-05	0.00204	450.262	219.457	91.5326	102.007	4.0081	67.6608	29.9761	9.33203	6.58471	20.0561	55.8826	10.6266	0	9.30778	8.96485	0	0	49.6904	7.61264	0	0	0	NA
NonamEVm026983t1	91.19	-5.29	1.37726	4.7e-06	0.000385	436.439	599.321	52.104	107.99	2.77138	703.82	15.3657	7.37657	2.53167	5.17951	56.6935	2.52705	8.24897	2.32982	3.41716	0	0	0	0	0	0	0	NA
NonamEVm027079t1	150.78	7.76	2.30641	1.1e-06	0.000119	0	0	0	0	345.828	0	172.672	213.653	662.991	120.087	0	192.829	78.2473	497.403	450.753	109.412	0	105.716	64.9109	158.706	85.9052	58.0727	Actin
NonamEVm027290t1	56.67	-6.14	1.20019	7.66e-09	2.31e-06	747.966	229.136	28.8245	101.562	7.38244	19.6217	6.6269	4.43421	5.56953	14.9115	29.9665	3.38737	2.30316	1.75066	2.56568	0	0	18.376	11.7952	0	0	10.5454	NA
NonamEVm027312t1	62.55	-6.35	1.73911	2.53e-06	0.00023	518.13	462.674	52.8136	154.495	2.76843	2.2791	5.4293	0.464518	0.550765	10.3545	127.276	2.39246	0.920152	0.583217	0.854862	0	0	0	24.3138	0	0	9.85379	NA
NonamEVm027415t1	85.97	-5.04	2.30838	0.000162	0.00603	94.241	386.666	195.967	259.768	1.54027	218.7	9.15142	0	0	0.646441	346.983	0.838298	0	2.90632	0.426547	93.7854	0	0	22.1278	38.1096	0	219.579	NA
NonamEVm027562t1	278.64	-6.39	1.57356	6.04e-07	7.57e-05	2149.82	1140.66	166.298	380.308	12.0278	826.848	9.89715	9.51216	14.5525	32.2965	1124.41	10.724	4.03634	2.25215	2.0575	0	133.239	0	52.464	9.91405	0	48.8446	Agrin
NonamEVm027570t1	37.94	-5.85	1.38123	6.32e-07	7.76e-05	375.541	197.575	17.1361	81.3053	5.21071	25.1159	4.11382	1.48134	3.0335	11.6804	97.0746	1.13744	0.927798	1.75435	2.13952	0	0	0	4.17066	0	0	5.33744	NA
NonamEVm028220t1	88.9	-3.5	1.22875	0.000167	0.00615	644.99	316.981	75.4125	188.837	28.952	265.949	41.9902	19.6416	39.4788	70.491	67.4202	16.5096	11.876	23.8452	22.1886	0	0	92.9221	17.9877	0	0	10.426	NA
NonamEVm028406t1	919.23	-4.49	1.35186	3.74e-05	0.00199	2663.76	2537.76	3496.52	1864.92	12.9152	800.189	317.425	106.332	26.331	249.345	6393.48	50.16	18.3131	55.7566	132.356	0	3.24183	103.073	26.0861	283.46	722.405	359.272	NA
NonamEVm028410t1	387.49	-5.62	1.34231	1.02e-06	0.000112	1225.41	864.245	1872.79	688.941	2.28852	321.292	250.164	68.4797	68.5973	210.683	2379.55	16.032	1.06803	28.8075	3.39904	0	0	0	0	9.90026	161.59	351.547	NA
NonamEVm028419t1	158.46	-4.57	1.04088	1.26e-06	0.000133	1460.75	341.987	174.493	520.784	18.4255	324.979	196.981	24.249	58.259	171.026	68.8538	11.1172	6.51021	37.5073	17.1529	0	0	36.2478	14.6291	0	0	2.14089	NA
NonamEVm028422t1	547.8	-4.4	1.48606	8.29e-05	0.00359	1707.54	2655.78	1319.24	1284	4.3166	128.382	112.172	116.674	38.1378	228.397	3512.96	6.5741	19.5841	12.348	119.623	0	66.9349	0	5.59155	250.149	376.333	86.8774	NA
NonamEVm028562t1	910.42	-2.85	0.882519	8.83e-05	0.00374	2573.55	1013.06	1003.74	762.078	122.495	1102.52	366.79	346.338	166.484	228.581	1785.15	77.2918	313.05	150.173	123.376	3050.11	1891.7	2707.61	1783.12	96.3707	142.425	223.218	NA
NonamEVm028572t1	10607.2	-4.82	1.23515	6.05e-06	0.000469	18267.7	6750.94	6337.89	111733	98.0981	8318.79	18588.3	2488.65	445.259	13161.7	1801.13	258.436	48.1496	72.019	414.208	65.6671	471.955	82.2558	32.3117	5583.31	9354.26	28984.3	NA
NonamEVm028663t1	313.41	-5.25	1.13159	2.33e-07	3.62e-05	2826.31	1237.11	232.655	355.961	34.2345	103.62	8.74803	27.0102	28.3696	57.5782	955.647	14.8116	26.9172	15.1231	30.3095	219.12	146.007	279.879	202.063	15.2529	4.52704	73.8715	NA
NonamEVm028808t1	414.82	-6.51	1.13468	1.49e-10	7.33e-08	5315.33	1149.01	334.269	618.197	33.0547	155.079	19.3953	16.5701	25.0505	65.8309	624.833	11.3331	14.2212	8.31984	22.5729	140.607	55.3382	119.815	204.817	30.116	114.951	47.3586	NA
NonamEVm028843t1	20.02	-5.56	1.26925	4.93e-07	6.37e-05	133.066	75.8995	62.6405	20.9152	7.96526	57.607	2.87389	3.46462	7.08202	7.1486	49.1943	0.571164	2.79433	0	0.428602	0	0	0	5.57251	0	0	3.22551	NA
NonamEVm028854t1	66.42	-6.3	1.4415	1.98e-07	3.2e-05	825.634	189.638	83.4379	65.4871	8.60689	126.958	1.65063	0.494971	4.56259	2.60229	43.6579	1.70975	0.929732	2.34484	2.57392	77.8034	0	0	18.8139	0	0	4.27716	NA
NonamEVm028905t1	55.05	-6.39	1.50982	3.19e-07	4.5e-05	409.772	372.336	15.8277	155.979	2.15336	105.591	13.6564	1.97416	6.0798	12.3354	97.5924	1.98269	1.8487	0	0.856327	0	0	0	13.2038	0	0	0	NA
NonamEVm029093t1	44.1	20.28	2.08177	6.4e-23	1.83e-19	0	0	0	1.24082	37.824	0	73.9207	89.6334	114.168	52.2613	0	85.0409	71.0061	303.406	57.8999	0	0	0	53.1418	10.8668	0	19.7269	NA
NonamEVm029789t1	189.61	6.78	2.32272	9.97e-06	0.000709	0	0	1.46788	33.14	56.1327	0	386.051	133.722	494.517	521.521	0.396794	130.212	294.16	722.752	233.224	0	0	489.763	219.975	378.584	0	75.7742	NA
NonamEVm030041t1	57.85	-2.91	0.840331	4.91e-05	0.00238	396.228	193.049	78.9024	86.9535	36.0451	63.9245	74.9593	41.3974	36.983	47.7077	48.5563	27.1934	20.292	27.7416	19.3848	0	0	23.5782	18.932	4.43257	0	26.4152	NA
NonamEVm030316t1	103.7	-4.63	2.1211	0.000235	0.00798	976.519	48.3373	67.2034	0	1.28339	110.842	3.68151	0.473293	2.92064	0	49.5567	6.38359	1.43928	1.21651	2.67475	292.7	0	259.959	30.4623	0	416.186	9.51325	NA
NonamEVm030324t1	322.94	-5.42	1.6924	2.24e-05	0.00129	566.916	3016.43	414.627	1045.44	7.38745	1081.78	95.8255	0.984491	3.54461	14.2537	263.219	4.2225	0.459403	31.4827	2.99186	0	0	18.4527	8.31982	0	42.8477	485.465	NA
NonamEVm030341t1	95.43	-6.41	1.4344	1.15e-07	2.02e-05	1025.19	425.537	69.3182	117.722	14.7604	246.364	9.9491	1.96594	11.633	21.9967	110.493	1.68528	4.12568	0.582121	3.41448	0	0	0	17.9998	0	0	16.771	NA
NonamEVm030377t1	93.94	-3.76	1.14138	5.96e-05	0.00277	856.755	395.537	66.5666	261.852	20.0108	75.1206	28.6492	11.3072	29.8658	35.5986	130.119	17.121	20.1563	23.2909	22.205	0	0	49.3651	20.0836	0	0	3.14054	NA
NonamEVm030521t1	23.64	-3.99	1.55783	0.000216	0.00747	220.625	153.782	6.96696	42.5624	1.2111	1.83974	9.25752	13.0028	1.00941	9.16618	20.4467	1.74652	3.32558	8.87524	0	0	0	0	8.40399	8.87266	0	8.91528	NA
NonamEVm030790t1	346.39	-7.44	1.60022	1.03e-08	2.98e-06	3356.68	2658.42	233.308	427.345	7.07856	105.738	2.07061	2.46772	5.06803	17.5312	631.676	7.07821	0	2.9228	7.70794	0	0	12.2261	12.5095	40.5186	38.2867	51.8719	NA
NonamEVm030817t1	41.77	-3.81	1.02338	1.96e-05	0.00116	269.445	113.04	57.811	104.261	28.0416	128.038	33.6263	17.7518	17.2395	49.3205	40.8026	8.18392	0	10.5126	10.2736	0	0	24.596	4.86134	1.09432	0	0	NA
NonamEVm030871t1	4775.98	-7.07	1.59236	4.82e-08	1.04e-05	2989.91	2279.58	2528.61	24233.3	1.23444	758.878	336.922	52.1783	20.2891	248.274	0.39984	16.2785	0	9.32835	2.1385	17689.3	19639.2	3522.06	3649.92	2785.5	8116.48	16191.8	NA
NonamEVm030961t1	44.28	5.93	2.22015	3.63e-05	0.00195	0	0	0	4.96204	34.7427	0	48.5749	78.859	163.656	99.3586	0	41.2753	48.2582	218.131	91.9554	0	0	0	41.409	71.724	0	31.1587	NA
NonamEVm031028t1	50.28	11.16	8.92703	6.44e-05	0.00292	0	0	0	0	0	0	0	0	0	0	0	0	587.671	0	0	0	448.921	61.2597	1.45588	6.90159	0	0	NA
NonamEVm031434t1	30.95	-4.47	1.31798	3.19e-05	0.00175	111.875	187.294	55.0681	69.5448	6.77481	110.994	7.06445	10.3156	8.09835	15.5249	79.0008	1.40049	8.2296	0	1.2804	0	0	0	4.15231	4.36033	0	0	NA
NonamEVm031712t1	65.1	7.22	1.96472	7.56e-07	8.97e-05	0	0	0	13.6852	9.55189	0	106.619	92.5959	186.663	72.9528	0	88.7944	70.4411	413.739	85.6343	15.6423	0	37.3948	53.855	83.673	79.193	21.743	NA
NonamEVm031859t1	20.64	5.31	2.14474	8.79e-05	0.00374	0	0	0	0	1.2526	0	0.843077	13.5491	33.7323	0	11.7994	14.4207	144.881	30.5704	41.3002	0	0	143.278	18.3707	0	0	0	NA
NonamEVm032348t1	44.16	-3.32	0.847301	1.22e-05	0.000814	319.851	67.1105	93.4615	32.2558	22.2273	17.5029	32.3136	27.3605	56.5279	58.1782	57.1422	7.44995	13.5554	10.6041	18.9669	0	42.6705	12.1474	19.6075	11.0418	0	51.6454	NA
NonamEVm032391t1	310.24	-6.49	1.1706	4.59e-10	1.97e-07	3121.01	2016.87	373.32	309.12	12.2963	208.461	7.0245	7.4085	15.7031	46.1152	178.403	12.7718	14.8199	4.67959	12.4212	46.7042	0	97.3274	106.394	80.0083	85.4325	69.0834	NA
NonamEVm033629t1	1717.78	-3.74	0.849355	1.88e-06	0.000181	6902.95	4769.14	3818.88	4697.86	244.687	8335.37	933.967	237.348	412.683	915.115	1627.61	282.472	168.554	350.077	401.458	500.523	172.274	530.251	472.607	424.971	1123.52	468.751	NA
NonamEVm033635t1	25.88	-5.34	1.47879	8.77e-06	0.000642	313.95	37.6937	8.6782	103.06	2.77389	5.91732	31.981	31.0559	12.1692	12.3274	5.19966	3.38336	0	1.16769	0	0	0	0	0	0	0	0	NA
NonamEVm033830t1	466.69	-4.3	1.0401	3.93e-06	0.000333	4831.05	1590.49	679.146	1089.82	111.256	113.702	95.7809	53.9348	131.578	140.836	761.097	47.9466	71.4512	126.021	70.768	46.9292	0	43.5811	94.6613	59.8196	81.4528	25.932	NA
NonamEVm034293t1	79.95	5	3.43421	0.000303	0.00976	0	0	0	0	26.668	0	76.8355	65.198	145.734	134.205	0	7.28898	1173.53	49.3511	78.7426	0	0	0	1.3809	0	0	0	NA
NonamEVm034551t1	4812.52	-10.82	2.31084	3.3e-10	1.47e-07	38246.2	18790.9	7701.64	27373.7	267.29	8048.65	16.3401	5.5193	0	5.91592	2235.98	5.82653	0	0	12.9953	0	0	5.90335	0.705202	825.923	158.893	2173.05	NA
NonamEVm034845t1	20.52	-8.5	2.35088	2.04e-07	3.22e-05	283.935	95.8496	3.84551	49.5825	0.546108	0	2.20816	0	1.34751	1.14929	9.30332	0	0	0	0	0	0	0	0.61493	0	0	2.97834	NA
NonamEVm034912t1	93.75	5.94	2.28256	4.02e-05	0.00206	0	1.17201	0	7.41225	16.5651	0	342.498	121.805	279.696	221.693	0	78.1919	94.5514	500.867	167.543	0	0	36.6845	61.5611	83.918	0	48.3233	NA
NonamEVm035600t1	43.22	4.55	2.23541	0.000297	0.00963	0	0	1.43609	6.16941	24.206	0	218.288	142.283	52.4472	117.508	3.58136	41.027	21.0937	180.727	41.3084	0	0	0	27.6387	19.5962	0	53.5302	NA
NonamEVm036294t1	24.05	-4.63	1.94044	0.000179	0.00645	84.9718	112.902	14.4314	61.9828	2.15461	216.281	1.65839	0	0	1.29679	26.3771	0.564163	0.920645	0.583561	0.855379	0	0	0	4.16339	0	0	0	NA
NonamEVm036410t1	69.11	6.54	2.24916	1.3e-05	0.00085	0	0	0	0	150.016	3.95454	96.3764	117.096	249.721	49.875	0	223.355	37.6006	156.171	191.872	0	96.8133	0	26.3365	70.9823	0	50.3041	Actin, cytoskeletal 2A
NonamEVm038343t1	146.05	-5.44	1.22528	4.4e-07	5.87e-05	1349.98	480.973	44.2709	149.255	38.7947	162.057	17.5443	42.2461	24.3684	40.6656	233.908	0.704033	15.9333	2.89936	10.6557	0	144.455	0	50.9521	13.5825	194.753	195.084	NA
NonamEVm039932t1	2269.88	-4.29	0.983025	1.67e-06	0.000166	11038	4829.47	5959.85	4946.31	281.634	1186.83	3731.66	1160.79	616.272	2342.54	8142.54	186.709	9.65408	181.163	648.918	197.458	343.22	420.148	125.763	791.653	1755.55	1041.21	NA
NonamEVm040186t1	73.46	-5.05	1.26105	3.54e-06	0.00031	826.106	263.369	76.4068	156.147	13.5441	119.671	9.94513	0.986487	11.1487	7.7882	43.9928	7.91619	1.8454	10.5158	3.85242	0	0	18.3731	34.7296	9.8494	0	0	NA
NonamEVm040847t1	253.22	-3.62	1.27088	0.000159	0.00593	1980.32	965.327	224.926	525.659	25.5662	526.561	226.243	51.5373	32.3898	176.495	99.3138	40.534	114.083	33.7181	11.9443	218.8	0	99.2317	143.848	31.5821	0	42.6904	NA
NonamEVm042291t1	1448.62	-7.17	1.23921	3.94e-11	2.42e-08	15612.3	7670.99	843.449	1916.52	36.4496	346.614	55.7964	37.5328	56.6805	131.987	2104.11	25.1636	21.6984	49.7655	20.3541	249.951	1040.63	186.61	221.813	270.071	390.043	581.105	NA
NonamEVm042526t1	33.25	-3.25	1.00792	8.33e-05	0.0036	302.787	84.6593	25.9911	81.8052	11.998	57.1158	14.9259	14.7589	7.08527	15.5406	19.9598	9.2838	11.0189	11.6535	9.82477	0	0	43.0355	6.92924	1.09199	0	2.10025	NA
NonamEVm043137t1	67.46	20.34	2.71618	1.68e-14	1.45e-11	0	0	0	0	6.15085	5.9347	1.24485	0	1.51661	5.16936	198.871	3.91863	662.46	2.32483	0.852659	0	0	524.857	60.1452	3.26704	0	7.30408	NA
NonamEVm043697t1	57.87	7.13	1.9229	7.7e-07	9.07e-05	0	0	0	14.8277	10.4354	1.95603	66.1071	66.3949	92.9724	53.065	4.78527	68.2215	141.226	315.727	72.9836	0	0	36.6378	173.145	116.759	0	37.9244	NA
NonamEVm044096t1	994.39	-4.78	1.36395	1.95e-05	0.00116	8019.89	6340.83	559.195	1613.9	63.5552	1953.78	60.9157	33.7533	67.7881	169.669	1424.79	220.183	20.5003	31.1571	72.291	577.996	45.9569	128.224	158.632	73.8075	0	239.838	NA
NonamEVm044243t1	29.35	-7.64	2.31837	1.54e-06	0.000155	311.041	90.8123	17.4018	135.523	0	55.4897	1.24801	0	1.52106	10.3711	13.5915	0	0.458567	0	0	0	0	0	8.32231	0	0	0	NA
NonamEVm044792t1	44.21	19.99	2.10305	6.15e-22	1.32e-18	0	0	0	0	11.862	0	267.303	68.0505	56.4651	45.5224	1.54955	51.2217	29.1713	249.075	98.6541	0	0	35.2949	18.1864	1.196	0	39.1596	NA
NonamEVm044819t1	119.36	-4	0.901197	1.44e-06	0.000147	913.811	519.972	80.1569	179.55	36.5689	287.454	56.8417	60.8163	35.1852	127.323	84.7113	29.7517	8.24985	26.6382	28.9137	24.9434	0	4.88989	22.3054	12.2637	63.0533	22.4134	NA
NonamEVm045399t1	21.54	-5.51	1.59045	1.09e-05	0.000756	290.321	22.4156	8.59608	50.4713	0	1.68186	36.9501	31.1398	9.75353	16.4071	2.36192	0.472835	0	0.983531	1.80434	0	0	0	0.585021	0	0	0	NA
NonamEVm048316t1	84.69	-6.09	1.39191	2.67e-07	3.93e-05	531.295	265.782	116.931	512.835	22.3638	11.3806	15.9446	12.579	5.95641	37.5975	14.424	1.48465	1.97138	0	4.17288	0	69.2767	79.4762	118.679	0	0	41.0066	NA
NonamEVm049857t1	76.31	4.29	1.92346	0.00029	0.00946	0	7.0598	0	7.44305	63.3573	0	124.537	83.8583	245.642	158.233	4.38235	108.725	95.8096	385.092	120.17	0	0	24.737	131.276	93.5843	0	24.9955	NA
NonamEVm051054t1	29.19	-3.74	1.29821	0.000141	0.00544	140.538	147.617	15.7128	39.5005	21.8232	61.6584	24.7157	1.9862	14.718	39.1198	25.2796	4.29745	0.467218	5.87883	6.44995	0	0	30.0997	52.4117	9.92252	0	0	NA

## Sheet: S1vS5
transcript_id	baseMean	log2FoldChange	lfcSE	pvalue	padj	S1_1	S1_2	S1_4	S2_1	S2_2	S2_3	S2_4	S3_1	S3_2	S3_3	S3_4	S4_1	S4_2	S4_3	S4_4	S5_1	S5_2	S5_3	S5_4	S6_1	S6_2	S6_4	gene_name
NonamEVm000002t1	76285	5.57	1.76008	5.52e-07	5.19e-05	38.5944	173.281	5899.72	10857.1	764.948	59.022	15040.7	16191.5	11513.2	14645.8	1168.9	9927.06	14936.1	34936.7	12048	870548	15502.1	172823	25818.2	64240.1	353574	27564.8	Twitchin
NonamEVm000181t1	16753.3	5.13	0.952716	1.94e-11	5.78e-09	493.699	930.671	2064.26	652.06	3626.87	618.589	1115.06	4545.61	6126.24	1354.05	4444.16	22857	5786.75	4788.81	6542.99	119885	88097.9	13023.2	23059.4	21288.7	11126	26146.3	Collagen alpha-1(V) chain
NonamEVm000189t1	5463	-6.12	1.48564	1.46e-08	2.31e-06	11906	17946	8182.73	10726.2	488.374	2816.28	6750.75	3918.83	2927.6	5913.45	31574.6	7867.85	26.1226	2596.18	3291.57	231.359	0	98.6819	47.5813	533.895	2009.33	332.653	Hemolymph clottable protein
NonamEVm000221t1	4178.68	3.44	0.955184	9.45e-07	7.88e-05	159.59	979.341	727.541	501.074	3370.04	436.034	1776.9	1238.19	3050.98	2201.07	1766.96	7178.59	3729.76	2737.34	2917.05	42014.4	1643.1	4597.08	6416.07	2173.54	1180.61	1135.81	Collagen alpha-2(IV) chain
NonamEVm000240t1	80.08	5.88	2.94488	2.19e-05	0.00098	0	0	1.27482	0	43.9939	0	53.9303	118.07	41.2988	22.4154	0.730104	404.7	13.9525	22.8203	63.2881	596.899	368.31	0	7.52576	0	0	2.61976	Chitinase-3-like protein 1
NonamEVm000247t1	388.7	4.01	1.09274	1.98e-07	2.31e-05	32.5385	47.2558	6.15068	15.1658	645.635	86.1415	392.291	240.728	380.741	259.173	176.425	381.295	1218.24	142.395	362.804	1650.59	203.362	1261.07	679.818	122.071	59.8328	187.696	Chitin synthase chs-2
NonamEVm000254t1	19917.3	3.62	0.780546	5.5e-09	9.37e-07	1434.65	4676.3	4253.81	2020.79	7420.11	2855.3	2138.71	4544	10442.5	3434.5	12905.3	26546.7	10018.1	8875.28	11547.5	165218	50800.4	28487.9	28453.9	16890.8	15737.5	19478.6	Collagen alpha-1(II) chain
NonamEVm000288t1	217.64	4.41	1.66264	6.21e-06	0.000382	0	19.4337	14.647	13.0191	53.7616	0	314.05	114.444	137.309	210.545	16.7728	94.3128	46.8039	100.556	48.14	2302.38	1081.7	57.0572	15.759	51.4808	16.5639	79.3479	NA
NonamEVm000292t1	82.97	3.14	1.86007	0.000474	0.00874	0	2.63092	0	6.82911	83.271	0	33.1882	112.03	102.421	47.4137	1.32128	59.2337	78.5974	61.4742	81.7491	109.912	0	131.415	70.2819	582.624	0	260.854	Multiple epidermal growth factor-like domains protein 6
NonamEVm000304t1	1269.72	-2.17	0.759201	0.000525	0.00934	7975.14	3884.01	3306.14	1891.64	250.343	1294.07	498.768	195.776	355.687	603.9	2593.38	380.587	604.968	490.497	366.617	1480.01	252.213	236.979	660.094	273.732	215.354	123.956	Murinoglobulin-1
NonamEVm000350t1	138.6	-2.57	0.91388	0.000187	0.00475	256.668	374.834	232.919	297.58	158.964	416.811	316.146	70.7232	140.227	199.572	111.452	47.1582	78.295	145.013	76.5246	0	0	49.8712	30.6676	43.4687	0	2.34367	Structure-specific endonuclease subunit SLX4
NonamEVm000381t1	1500.11	3.26	1.10424	1.63e-05	0.0008	129.387	70.7197	337.467	381.219	2663.71	263.711	2512.56	388.346	322.988	681.362	608.29	2019.48	3550.77	91.3908	806.743	11726	558.895	4863.06	480.567	77.235	163.143	305.492	NA
NonamEVm000389t1	101.44	-2.51	0.885763	0.000203	0.005	379.111	359.698	157.57	155.684	107.529	379.466	97.0317	33.0728	75.2537	94.9755	107.143	48.796	12.5322	59.7261	32.7366	0	0	67.2349	27.5347	23.4374	0	13.2544	Ras GTPase-activating protein raskol
NonamEVm000391t1	231.09	-3.68	1.27704	7.59e-06	0.000436	680.785	751.963	521.167	873.814	83.5145	225.825	115.01	63.7103	201.212	215.605	619.052	358.85	27.2719	63.2703	92.4835	0	0	49.898	19.3389	3.26093	72.4424	45.5595	Transferrin
NonamEVm000442t1	1118	-2.32	0.835269	0.000413	0.00808	5822	3231.12	1768.8	2097.71	647.274	979.637	1227.51	255.676	499.149	618.657	1349.86	1742.65	815.549	872.278	709.192	516.266	0	324.505	628.139	251.089	104.904	134.112	Calpain-B
NonamEVm000449t1	263.04	3.2	0.822691	6.92e-07	6.03e-05	32.5073	53.4918	59.6316	84.507	200.134	231.281	321.421	101.131	132.256	213.105	132.805	162.109	468.874	97.9707	175.05	1513.62	222.53	845.224	641.89	50.4405	0	46.8277	NA
NonamEVm000477t1	292.96	-4.41	1.36711	7.28e-07	6.3e-05	1908.77	1673.87	377.077	709.495	126.072	825.571	42.5038	48.0168	107.272	114.288	249.493	19.4798	33.6223	29.0165	14.0617	0	0	24.9552	62.838	43.4681	0	35.1877	Receptor-type tyrosine-protein phosphatase zeta
NonamEVm000492t1	43.52	-4.29	1.7299	1.24e-05	0.000654	154.115	36.3495	81.3841	65.2803	8.5765	10.1359	21.2165	24.167	25.2939	415.71	50.7937	11.5583	9.15493	6.32617	16.1878	0	0	4.51925	0	15.8408	0	0.751355	Retrovirus-related Pol polyprotein from type-1 retrotransposable element R1
NonamEVm000493t1	209.78	19.97	2.96134	1.89e-12	7.52e-10	0	0	0	0	0	0	149.444	599.076	132.484	26.4536	0	247.65	912.274	567.384	574.066	0	0	753.878	333.29	117.369	0	201.896	Myosin heavy chain, muscle
NonamEVm000498t1	866.78	2.81	0.664097	6.82e-07	6.01e-05	103.296	314.778	90.0568	458.519	968.123	641.967	1014.82	695.619	676.601	897.679	749.184	753.408	2460.52	459.852	780.666	1012.01	1663.44	3462.09	1125.13	196.451	111.335	433.69	Chitotriosidase-1
NonamEVm000501t1	779.33	-6.78	2.28277	9.66e-07	7.97e-05	5381.34	2988.11	1855.61	2502.65	11.4685	175.931	37.2713	3.44305	11.8092	31.0958	4045.42	2.65494	5.55773	12.5243	5.07495	0	0	31.609	4.86691	8.18227	0	30.5885	Hemocytin
NonamEVm000525t1	404.24	-2.65	1.13501	0.00043	0.00825	4885.77	380.683	368.663	1751.56	66.5126	301.959	105.655	41.7775	65.1316	112.41	172.674	53.3089	39.5898	62.011	26.4544	0	0	241.013	123.174	31.6746	51.7993	11.5449	NA
NonamEVm000555t1	1817	-1.91	0.508487	4.81e-05	0.00174	3641.43	3757.76	1466.24	2145.52	1650.22	2968.32	3556.8	2086.35	2300.19	2660.38	1467.39	1339.11	2744.42	1590.42	1652.51	610.795	219.378	783.402	948.772	849.954	595.075	939.517	NA
NonamEVm000568t1	164.1	-3.13	1.09844	3.08e-05	0.00128	449.52	491.54	335.547	280.287	70.4122	639.115	187.743	66.4088	143.01	201.641	244.095	166.647	40.587	103.055	58.462	0	0	5.72968	53.7735	34.9493	0	37.7612	NA
NonamEVm000580t1	89.59	2.73	0.943371	9.09e-05	0.00283	16.0878	19.7897	6.2787	19.9736	193.033	9.8791	99.8118	55.8762	117.548	58.9892	42.6861	203.609	53.5797	69.5084	81.8104	573.559	154.274	78.4159	75.9506	22.7792	0	17.5706	Calcium-activated chloride channel regulator 1
NonamEVm000599t1	220.37	2.81	0.601605	9.84e-08	1.25e-05	44.9527	57.1749	48.4677	90.4309	336.647	145.636	219.526	237.517	120.635	205.334	145.083	246.428	284.982	76.7477	214.845	805.376	649.158	371.191	198.319	117.392	77.6644	154.724	Superoxide dismutase [Cu-Zn]
NonamEVm000630t1	386.75	-2.8	1.1045	0.000177	0.0046	944.473	854.191	356.854	459.532	296.545	307.443	1230.12	777.054	460.022	879.564	159.64	365.253	393.943	357.738	286.606	0	0	10.2133	114.904	98.3347	0	156.103	Transposon Ty3-I Gag-Pol polyprotein
NonamEVm000635t1	82.66	-2.79	1.25178	0.000361	0.0074	6.72239	33.5564	984.93	42.2776	44.4474	62.5022	123.173	25.4891	46.9946	52.7398	9.71234	79.5713	83.1677	87.0629	43.4417	0	0	7.60557	34.9787	42.5019	0	7.59371	Proteasome activator complex subunit 4
NonamEVm000701t1	38.15	2.66	0.770546	2.04e-05	0.000927	10.5766	9.66335	10.4244	17.2391	48.1024	32.225	51.778	10.1858	24.6516	28.8858	7.88921	41.7814	31.051	12.0643	35.8503	112.1	239.133	82.9117	25.2912	4.45153	0	3.07619	NA
NonamEVm000723t1	5165.69	2.76	0.63865	5.64e-07	5.27e-05	907.401	862.295	1215.91	2564.77	5954.88	1546.3	4684.63	5172.4	5912.78	4787.59	3617.36	6737.92	7489.9	5580.46	6451.95	20132.8	1134.67	11857.4	6811.88	3295.32	3175.45	3751.09	NA
NonamEVm000744t1	3176.95	5.71	1.76787	4.25e-07	4.14e-05	14.5328	14.9942	258.817	612.124	116.583	0	538.171	263.919	417.848	273.791	22.9033	439.674	550.367	1068.44	473.66	40258	87.8609	13604.1	1406.35	2399.99	6752.15	318.715	NA
NonamEVm000781t1	142.57	4.4	1.83724	1.44e-05	0.000742	1.84471	3.26206	12.1514	19.916	66.2606	3.6183	258.027	22.9256	17.831	47.2384	3.5104	87.988	329.901	9.64038	30.0702	1865.2	0	255.003	75.542	10.5329	0	16.1167	Acidic mammalian chitinase
NonamEVm000784t1	2544.69	4.71	1.02567	1.17e-09	2.22e-07	39.729	141.291	403.05	64.8058	957.167	201.391	294.995	666.529	1467.17	395.644	778.394	3845.82	933.732	1127.44	1551.59	16686.8	12233.7	2517.78	2888.89	2060.39	2378.93	4347.89	Collagen alpha-1(IX) chain
NonamEVm000803t1	139.13	-2.14	0.739131	0.000502	0.00909	144.562	332.631	87.4219	184.826	270.063	120.605	243.225	97.1052	307.348	218.183	87.4917	113.602	145.114	226.489	133.451	50.1587	0	5.51727	49.8188	126.695	58.0411	58.5244	NADPH oxidase 4
NonamEVm000817t1	460.49	3.33	1.42185	7.93e-05	0.00253	15.5087	79.6927	10.0609	9.22419	228.449	309.587	1.23492	50.4296	50.5382	8.30513	405.165	1435.2	1218.79	173.336	328.348	2446.07	1401.07	1340.23	461.959	47.3294	0	110.219	NA
NonamEVm000818t1	915.94	2.38	0.74501	0.000107	0.00322	64.1895	240.907	59.7212	197.992	1658.33	506.059	507.343	834.603	1154.04	635.526	1905.21	2269.03	1754.43	1346.67	1812.73	970.647	112.601	1654.33	1610.01	281.514	437.09	137.646	NA
NonamEVm000819t1	65.17	-2.29	0.737383	0.000183	0.00469	123.096	89.9219	80.2062	70.1527	66.0498	119.358	153.093	81.3466	83.2215	137.377	77.4763	79.093	46.9681	62.2099	75.9177	0	0	22.9379	18.2366	18.4942	0	28.5033	Exocyst complex component 4
NonamEVm000845t1	3926.43	-2.29	0.542615	3.25e-06	0.000221	11131.3	4492.46	3103.84	4793.74	4512.81	4548.4	9960.76	8008.17	4715.46	5384.83	3121.86	3584.27	4246.38	4800.99	3057.03	871.385	444.277	1352.93	1226.06	867.423	673.927	1483.24	Probable RNA-directed DNA polymerase from transposon X-element
NonamEVm000857t1	2280.47	-1.79	0.564816	0.000472	0.00873	4851.62	2062.66	2209.96	2477.32	2249.83	1731.64	6318.53	5393.01	2475.21	3091.23	1052.78	2491.61	3166.85	2753.34	2083.38	514.002	474.847	592.627	1158.63	858.506	827.018	1335.78	Probable RNA-directed DNA polymerase from transposon BS
NonamEVm000907t1	270.2	-2.19	0.773195	0.000523	0.00933	1474.03	712.09	335.752	410.558	211.727	686.73	233.133	80.5509	159.005	278.266	179.13	159.694	252.34	116.859	147.573	54.3005	0	218.579	134.349	40.17	24.2287	35.2284	NA
NonamEVm000917t1	119.47	2.3	0.677285	7.25e-05	0.00238	81.105	48.5633	29.596	45.9544	129.129	30.5588	51.0912	24.4586	26.8077	42.1005	19.771	189.763	30.8513	31.9255	117.538	414.582	247.472	516.615	432.451	18.82	25.3731	73.7877	NA
NonamEVm000920t1	403.83	-3.09	0.856917	2.93e-06	0.000207	1594.12	795.053	391.953	591.324	283.31	733.766	968.377	529.283	336.854	576.265	352.084	283.192	241.982	402.368	283.631	0	0	132.917	81.8825	59.8482	81.7002	164.283	NA
NonamEVm000922t1	686.15	2.16	0.664734	0.000167	0.00445	277.387	241.826	332.086	176.974	137.68	80.2924	52.6705	221.6	200.541	95.9413	710.171	473.123	221.643	213.231	286.271	4325.44	1187.44	1262.95	857.407	2031.08	557.489	1152.13	NA
NonamEVm000932t1	35.72	-2.81	0.932627	5.11e-05	0.00183	50.2553	69.5765	84.6486	32.4505	56.9211	28.7574	94.8471	48.3727	41.6437	49.46	5.76157	63.2118	28.5642	65.7536	44.991	0	0	13.8779	4.34327	0	0	2.3014	Zinc finger protein 608
NonamEVm000950t1	208.26	3.41	1.19507	1.52e-05	0.000768	19.6053	33.0608	45.1283	175.546	4.93392	109.873	84.6045	1.96163	4.55668	33.6029	3.9883	17.2785	41.8597	5.80851	9.8081	1393.2	268.328	1776.95	420.199	63.0903	0	68.4252	Proton channel OtopLc
NonamEVm000975t1	36.39	-2.57	1.01761	0.000363	0.00741	15.8002	41.6971	72.3696	76.5124	26.7099	55.8708	130.053	18.7198	23.7395	41.8218	70.5576	41.2371	78.6843	67.6184	21.2059	0	0	0	4.97868	8.30688	0	4.75938	NA
NonamEVm001001t1	33.81	-2.3	0.844597	0.000502	0.00909	99.2121	77.3258	53.2088	50.0432	61.3427	26.3967	114.489	30.0115	29.1772	49.1495	26.2855	29.9794	30.6916	29.3987	18.966	0	0	0	18.2492	0	0	0	NA
NonamEVm001030t1	187.15	-2.57	0.95398	0.000247	0.00575	1060.17	676.848	280.451	661.807	86.3965	291.595	70.3876	45.1944	87.2876	200.1	215.759	23.3382	61.898	38.6959	44.5659	0	0	164.401	27.7827	14.4429	26.844	39.3487	NF-X1-type zinc finger protein NFXL1
NonamEVm001080t1	209.01	-3.07	1.31481	0.000143	0.00397	1351.83	1281.46	315.669	659.427	56.7058	85.8272	38.734	13.2345	25.3006	92.3605	393.433	17.8294	45.9376	19.1586	30.2614	0	0	18.6888	93.9445	29.3557	0	29.0204	Hemocytin
NonamEVm001112t1	56.34	-2.43	0.875993	0.000306	0.00657	183.069	167.452	37.1452	53.3409	85.7299	48.079	110.876	29.9513	67.1615	72.323	98.7062	35.1933	38.7834	94.0396	46.5584	0	0	7.16419	26.9278	25.1641	0	11.8202	Serine/threonine-protein kinase ATR
NonamEVm001141t1	55.43	-2.23	0.785414	0.000465	0.00863	159	125.038	74.1772	101.509	101.477	134.507	75.2496	33.2519	76.7271	74.1707	62.7551	40.5887	29.5698	40.9094	45.3054	0	0	0	37.984	4.07398	0	3.09068	Enhancer of polycomb homolog 1
NonamEVm001154t1	608.83	2.6	0.948854	0.000194	0.00483	75.0469	68.4903	35.2899	580.678	167.797	131.836	763.967	337.064	180.552	489.695	4520.22	653.115	8.95667	278.09	400.296	1388.11	540.544	781.429	710.679	404.51	305.181	572.732	NA
NonamEVm001250t1	42.11	4.27	1.8249	1.98e-05	0.000918	0	2.634	1.98416	44.4178	53.7771	9.68967	54.4469	21.1564	10.2795	32.9257	3.98781	18.0806	5.73407	3.43218	25.0729	26.1917	0	549.062	34.9531	0	0	28.6631	Cadherin-87A
NonamEVm001289t1	923.1	-3.1	0.697262	9.1e-08	1.19e-05	5720.02	3556.8	813.68	2752.62	468.388	845.489	847.692	409.329	469.194	741.575	940.273	340.077	259.524	397.017	368.427	111.777	169.832	245.471	460.151	90.2216	144.23	156.333	NA
NonamEVm001293t1	43.96	-3.17	1.1969	4.97e-05	0.00178	327.936	55.8697	24.0047	110.253	47.6832	44.678	37.1301	15.9587	39.1773	31.0283	22.1058	15.4858	23.2302	35.3872	18.1049	0	0	0	11.5781	22.2474	82.2637	2.90087	DNA excision repair protein ERCC-6
NonamEVm001302t1	755.69	6.83	1.28892	9.2e-11	2.42e-08	5.34559	1.18066	42.2013	110.796	635.284	47.9049	183.769	81.4467	74.948	164.202	6.7822	75.8739	324.253	12.2037	141.63	2175.81	235.13	7095.79	2451.77	622.539	964.488	1171.89	NA
NonamEVm001377t1	32.39	-4.29	2.07782	4.32e-05	0.00162	111.67	121.733	121.174	118.642	2.366	80.9903	6.88372	17.5903	2.72007	3.9692	119.604	4.06342	0	0	0.654794	0	0	0	0.530678	0	0	0	Scavenger receptor class A member 5
NonamEVm001381t1	88.73	-2.34	0.865091	0.000461	0.00859	210.068	98.4225	140.135	270.346	103.227	32.2981	146.231	110.63	91.0662	147.217	22.2174	104.713	103.775	121.532	43.5274	0	0	49.3024	13.2017	97.0728	31.3122	15.7003	Retrovirus-related Pol polyprotein from type-1 retrotransposable element R2
NonamEVm001405t1	69.76	10.64	4.95984	1.46e-05	0.000749	0	0	0	0	48.0261	0	524.361	110.985	472.496	241.974	0	9.16048	0	76.3117	44.1805	0	0	0	4.08886	0	0	3.07058	Myosin heavy chain, muscle
NonamEVm001453t1	4407.95	4.52	2.15341	3.2e-05	0.00132	0	0	315.343	934.492	55.774	0	803.176	748.287	477.569	598.555	81.2092	395.705	780.391	2498.02	885.649	48144.9	38.665	9597.74	2128.18	4956.78	22785.1	749.298	Disorganized muscle protein 1
NonamEVm001465t1	57.12	-3.56	1.14381	4.33e-06	0.000286	128.271	89.6876	117.874	93.3262	120.805	253.689	64.1509	19.1089	56.1584	51.0079	60.9731	71.8157	13.1795	27.856	68.1742	0	0	0	7.59569	9.78075	0	3.10604	Annulin
NonamEVm001472t1	105.18	3.1	1.69583	0.000397	0.00791	10.0662	0	6.30111	0	23.1112	26.0679	0	4.45526	1.72149	0	21.1311	692.016	176.739	10.3454	18.4838	645.686	379.426	275.056	21.555	1.82207	0	0	NA
NonamEVm001501t1	223.35	3.39	1.62916	0.000138	0.00388	1.7834	0	2.91333	4.98304	118.339	0	226.014	76.5046	230.755	169.113	223.04	331.682	2633.56	98.6891	396.091	62.6534	106.244	149.737	22.1281	3.26509	52.11	4.14904	Phenoloxidase-activating factor 2
NonamEVm001502t1	75.8	-4.11	1.45835	4.74e-06	0.000308	378.836	169.328	71.0805	79.0975	30.1747	212.557	299.844	23.808	42.0513	156.606	18.2768	107.559	28.4528	14.1272	20.8388	0	0	0	8.5406	4.5715	0	1.79387	Retrovirus-related Pol polyprotein from type-1 retrotransposable element R2
NonamEVm001508t1	23.02	-2.93	1.38531	0.000323	0.00681	14.245	11.7984	49.4427	64.6896	97.6922	113.693	50.3869	14.219	15.1817	19.3807	5.18284	23.6947	0	6.96878	15.7733	0	0	0	0	0	0	4.1492	NA
NonamEVm001542t1	84.39	3.57	1.54007	5.46e-05	0.00193	4.29995	0	14.7946	6.42544	1.39533	1.72667	51.4223	31.7727	20.4643	37.1923	12.3415	76.2801	15.028	26.9534	18.0217	595.542	593.513	106.408	6.9795	48.6849	0	187.26	N-acetylated-alpha-linked acidic dipeptidase 2
NonamEVm001555t1	468.7	-2.33	0.788889	0.000259	0.00597	233.437	1297.57	4566.84	402.11	181.332	341.383	360.05	78.4953	98.745	79.5088	186.699	742.695	379.742	169.673	201.339	469.605	79.4106	218.082	141.037	22.8529	56.6028	4.15093	Hemocyte protein-glutamine gamma-glutamyltransferase
NonamEVm001572t1	468.47	2.38	0.630286	1.55e-05	0.000776	17.9241	47.5137	171.941	137.665	265.551	313.057	279.481	357.109	289.913	268.59	160.609	343.2	210.273	348.976	303.474	377.975	392.127	538.655	1076.01	2581.24	833.664	991.43	BAG domain-containing protein Samui
NonamEVm001582t1	345.15	-3.26	0.905646	1.67e-06	0.000128	1175.2	716.928	222.822	683.066	407.058	542.644	669.752	269.968	493.503	349.703	304.413	283.348	450.969	539.154	294.095	0	0	65.3344	71.1763	3.92159	38.8008	11.4517	Influenza virus NS1A-binding protein
NonamEVm001597t1	197.7	4.79	1.60987	1.46e-06	0.000115	0	0	5.07392	6.28185	19.6132	19.1192	86.6289	128.607	103.487	129.654	11.71	297.67	223.467	444.563	256.845	95.5831	0	188.002	284.105	1067.17	391.339	590.48	NA
NonamEVm001608t1	293.19	-3.35	1.00864	3.57e-06	0.000239	1575.24	813.54	216.94	638.599	183.432	1042.94	324.19	169.664	218.877	305.78	72.8209	268.928	104.58	77.1406	123.895	0	0	70.5464	72.2439	28.7356	98.4544	43.5576	Retrovirus-related Pol polyprotein from type-1 retrotransposable element R2
NonamEVm001612t1	79.57	-2.28	0.831999	0.000517	0.00926	255.859	221.983	147.452	139.235	102.509	253.601	69.3941	22.5279	61.3428	37.7637	45.0046	81.6486	62.9889	69.4831	66.2684	0	0	26.281	48.3536	14.9092	23.8672	0	Tyrosine-protein phosphatase non-receptor type 9
NonamEVm001725t1	29.39	16.91	2.8263	2.73e-10	6.04e-08	0	0	0	0	0	0	161.427	148.562	80.4253	13.5992	0	6.8754	24.6428	52.3947	49.024	0	0	87.3018	2.0779	8.72273	0	11.4435	Myosin-4
NonamEVm001769t1	1459.97	4.58	0.862357	2.42e-11	7.07e-09	124.098	139.678	266.217	120.517	875.713	186.972	287.552	180.793	425.376	292.087	512.885	1023.9	387.773	340.843	720.649	11026.3	989.914	9269.39	3924.36	237.63	336.534	450.237	Glutamine--fructose-6-phosphate aminotransferase [isomerizing] 2
NonamEVm001803t1	105.24	-2.59	0.911809	0.000154	0.0042	49.0847	243.405	118.805	64.3048	40.7529	304.184	195.473	106.402	186.777	325.849	124.193	32.3209	54.6046	134.345	43.2662	0	0	6.12661	23.7232	94.8304	109.856	56.8928	NA
NonamEVm001820t1	483.92	5.41	1.59085	2.33e-07	2.56e-05	0	3.16699	59.028	0	221.034	39.0638	328.928	69.5505	97.665	143.11	24.535	113.571	432.544	32.4089	76.6186	4586.97	540.854	3049.73	602.286	90.8356	52.8672	81.4855	Chitin deacetylase 8
NonamEVm001850t1	324.29	-2.36	0.764041	0.00016	0.00431	459.955	752.639	322.35	546.237	459.029	535.05	760.915	374.419	531.062	431.699	226.206	173.342	330.709	627.622	254.87	0	0	101.042	110.165	69.3723	38.9766	28.7465	Serine/threonine-protein kinase PRP4 homolog
NonamEVm001930t1	2714.87	-3.69	1.42682	2.02e-05	0.000927	31878.1	16320.6	982.286	3819.27	97.3249	755.116	80.2859	39.3555	89.2457	480.825	2932.69	76.1818	92.2058	124.842	39.8189	477.291	129.262	627.805	250.396	18.7836	48.3295	367.118	Phenoloxidase 2
NonamEVm001959t1	41.05	-2.18	0.697859	0.000233	0.00557	54.8007	69.7815	54.4456	36.0146	89.5182	29.5373	39.5144	24.7745	44.447	72.5904	29.75	55.9937	36.4587	55.4851	37.428	0	0	9.66478	13.9713	47.3753	47.4693	53.9924	Cell division cycle protein 16 homolog
NonamEVm001974t1	388.92	-2.39	0.76564	0.000131	0.00378	1097	1309.73	460.126	510.286	138.58	1564.78	333.76	296.06	317.648	411.126	784.163	162.693	59.4157	126.318	170.312	0	258.944	69.5767	67.5677	110.49	119.168	188.579	Dipeptidyl aminopeptidase BIII
NonamEVm002109t1	83.54	-2.35	0.828884	0.000322	0.00681	159.408	239.387	104.227	95.8577	55.3079	356.502	163.58	126.123	77.8556	71.9933	69.031	62.4796	43.0394	52.8072	46.0213	0	0	21.7618	33.8871	15.951	1.58349	40.9723	NA
NonamEVm002186t1	45.48	-3.52	1.28882	1.71e-05	0.000828	317.64	171.908	51.0666	59.0709	20.7737	118.921	12.3368	7.6393	43.0892	64.394	71.4744	7.43904	18.6694	11.3741	9.85345	0	0	0	12.15	0	0	2.76964	NA
NonamEVm002187t1	28.13	-2.21	0.776284	0.000461	0.00859	72.9715	77.8452	36.3343	36.065	39.7471	111.591	39.545	7.8462	17.7108	12.2755	31.0975	21.4767	33.2405	31.3645	21.3166	0	0	12.439	11.7476	3.26355	0	1.03811	NA
NonamEVm002212t1	23.09	-2.36	0.905683	0.000555	0.0097	80.099	51.8728	21.6873	17.2327	57.9598	47.827	23.5032	10.3223	18.346	27.4497	35.4348	27.5327	26.1926	23.3054	30.0678	0	0	0	9.0506	0	0	0	N-acetylgalactosaminyltransferase 6
NonamEVm002272t1	72.9	2.57	0.97556	0.000286	0.00631	5.45096	15.6507	35.4258	61.0338	41.2929	89.8536	99.0486	10.9473	8.77794	16.3059	1.22034	41.9179	10.1596	2.37005	18.0874	909.797	92.954	82.592	57.7818	0	0	3.17461	Sodium-coupled monocarboxylate transporter 1
NonamEVm002307t1	50.45	-2.96	0.999072	3.69e-05	0.00146	173.577	145.011	82.059	106.238	49.4452	131.451	45.9657	9.66168	28.9271	24.8574	78.4606	50.4757	42.1564	20.5381	27.2424	0	0	13.8309	10.9703	31.7858	0	37.2486	NA
NonamEVm002340t1	366.36	4.99	2.58717	3.86e-05	0.00152	0	16.5122	5.81135	16.1663	0	5.97277	2.4973	0	0	0	2.3931	2.51314	16.4108	0	0	3753.15	0	3902.41	324.277	8.70877	0	3.11884	NA
NonamEVm002341t1	132.07	5.96	1.12354	5.93e-11	1.64e-08	0	6.15495	12.9063	17.2548	32.08	25.4255	29.9649	7.16379	25.1528	22.0973	7.48871	19.0288	101.931	16.8389	22.2993	1015.83	82.4511	1174.8	275.395	7.94571	0	3.24879	NA
NonamEVm002394t1	25.36	17.55	2.10032	1.26e-17	1.39e-14	0	0	0	1.30381	14.7203	0	65.7463	49.6762	69.5942	13.8667	0	41.3446	45.8905	70.0256	71.1837	0	0	0	84.5693	14.8386	0	15.2621	NA
NonamEVm002410t1	42.38	-2.99	1.13099	8.23e-05	0.0026	1.82977	162.344	83.6822	48.5587	18.9916	65.696	102.464	55.0009	68.8845	100.823	41.8743	13.4014	14.6824	55.2047	20.4713	0	0	6.38952	4.97746	16.7931	39.5365	10.6926	NA
NonamEVm002465t1	728.02	5.06	1.36563	7.11e-08	9.76e-06	10.0582	21.0237	91.9956	23.3617	117.511	33.7133	317.197	203.053	242.11	197.483	30.3096	1281.4	256.227	195.272	177.423	10138.3	445.932	809.133	483.269	216.629	634.542	90.4113	NA
NonamEVm002504t1	469.22	3.46	1.45608	5.53e-05	0.00195	0	8.44316	27.0509	200.659	1779.02	33.1362	1063.3	288.632	338.231	626.291	404.605	766.455	1646.06	110.299	903.959	757.22	0	843.193	491.403	7.78674	0	27.1689	NA
NonamEVm002509t1	401.7	3.51	1.29249	1.83e-05	0.000879	52.6597	23.1004	90.9621	135.788	2.79475	14.8018	35.0184	2.82935	1.25158	22.3678	2.30067	2.29783	1.12544	0	5.97443	5919.64	373.897	895.494	617.682	61.5454	158.55	417.385	NA
NonamEVm002510t1	422.11	-1.76	0.528443	0.000273	0.00616	818.997	581.693	531.991	451.562	732.185	626.644	662.204	349.459	571.1	642.956	411.197	563.1	369.437	497.472	533.742	77.3602	66.9408	135.53	307.205	180.289	51.472	123.965	RNA-binding protein Pasilla
NonamEVm002512t1	188.04	7.25	4.55292	5.67e-05	0.00198	0	0	0	0	0.651489	0	0	0	0	0	0	1.47878	0	0	0	2098.28	0	1726.01	155.471	66.5306	78.8627	9.63434	NA
NonamEVm002516t1	22.97	-2.48	0.989426	0.000492	0.00895	107.428	45.8038	52.439	40.1545	41.8104	23.4264	49.943	2.60203	32.5185	19.5474	24.0381	8.88193	11.0311	13.3651	15.9674	0	0	0	10.5599	0	0	5.78183	NA
NonamEVm002539t1	70.11	-2.79	0.907763	4.39e-05	0.00164	422.09	102.655	145.459	59.7195	88.139	239.487	43.73	26.47	69.8297	43.2749	59.3945	40.6772	21.8337	41.8021	45.6062	0	0	31.1441	22.7961	21.7459	0	16.5852	Fanconi anemia group D2 protein
NonamEVm002625t1	61.73	-2.71	1.10287	0.000277	0.00619	35.1981	44.0621	90.1062	68.5989	114.218	136.268	229.558	187.967	66.3585	110.907	7.71503	46.7345	41.2884	123.601	41.7248	0	0	0	5.22793	1.48146	0	6.98529	Retrovirus-related Pol polyprotein from transposon 412
NonamEVm002680t1	262.58	3.7	1.95266	0.000133	0.0038	4.75313	0	31.3936	0	18.7	2.09245	31.4032	0.522908	4.98404	13.5646	0	74.266	0	1.46367	31.8924	82.8653	10.9235	3906.93	531.265	391.085	318.401	320.341	NA
NonamEVm002687t1	1448.33	6.38	0.900361	2.16e-15	1.52e-12	64.8234	57.2476	69.1338	61.6226	270.168	53.2877	78.0484	108.721	208.407	64.5869	71.2749	491.921	1121.87	158.025	389.739	16486.4	666.565	7682.54	3219.41	133.954	236.921	168.603	UDP-N-acetylhexosamine pyrophosphorylase
NonamEVm002698t1	8478.1	3.57	0.902152	1.52e-07	1.86e-05	1281.65	1549.39	1224.45	3907.8	5317.15	2015.16	7568.11	2173.59	993.789	4060.63	4451.01	5594.39	19276.5	673.949	2499.26	57566.5	33075.9	20364.2	7615.46	1503.9	1542.28	2263.08	Chitin deacetylase 1
NonamEVm002829t1	6059.86	2.86	0.787827	5.61e-06	0.000355	1193.93	1860.73	833.641	2687.56	4018.23	1772.45	6495.82	3536.94	2124.13	6812	6690.26	3268.74	15627.8	1099.99	2316.3	27525.6	24799.8	11701.4	3570.82	1497.36	1498.04	2385.46	Chitin deacetylase 1
NonamEVm002862t1	142.92	3.68	1.63128	5.3e-05	0.00189	5.01951	0	9.86102	8.44236	192.229	12.6757	0.807293	43.325	75.5288	3.51941	94.5426	181.964	14.0058	95.3409	86.6746	539.964	0	182.107	446.492	570.478	129.733	451.442	NA
NonamEVm002897t1	735.55	-5.51	1.61211	2.17e-07	2.46e-05	5230.7	2315.63	1632.11	2310.62	412.234	408.221	89.9787	131.724	280.739	73.8256	2470.57	139.257	10.2434	208.057	200.447	112.702	0	14.1356	6.30083	16.1224	102.981	15.4092	NA
NonamEVm002928t1	82.05	4.6	1.9471	1.35e-05	0.000697	7.94633	0	2.77998	0	3.4993	0	3.38603	3.79369	0.646392	1.067	0	26.8935	82.9459	1.1138	8.31769	771.627	7.249	809.53	26.2702	37.3873	0	10.6402	NA
NonamEVm002935t1	63.78	-3.43	0.876502	2.75e-07	2.94e-05	136.79	120.08	88.2	74.6806	92.4507	92.5215	190.519	71.6338	82.1781	103.913	46.8043	41.1809	63.3323	127.952	45.987	0	0	20.8542	4.13621	0	0	0	NA
NonamEVm002948t1	64.76	2.98	1.67564	0.000545	0.0096	0	0	5.20757	10.7377	36.0439	0	94.5051	121.24	148.676	125.586	4.53647	37.9765	91.7744	153.723	53.0836	405.104	0	16.7139	20.6385	5.84679	92.06	1.28365	NA
NonamEVm002967t1	42.47	-2.34	0.861749	0.000455	0.00852	104.491	159.176	25.4479	35.4869	40.7711	62.9959	25.2037	34.6948	100.438	48.1649	65.1238	35.3263	55.9824	50.3615	35.4088	0	0	45.302	5.79709	4.05895	0	0	Probable cytochrome P450 49a1
NonamEVm002980t1	1537.55	4.48	1.19028	7.1e-08	9.76e-06	56.9302	320.64	91.2251	129.053	516.833	2153.55	49.3333	157.309	116.303	40.7902	147.028	343.517	12.1176	152.602	235.759	6884.53	11114.2	7699.13	2877.28	238.416	95.6572	393.899	Carotenoid-cleaving dioxygenase, mitochondrial
NonamEVm003047t1	85.79	-2.19	0.741543	0.000383	0.0077	165.23	144.069	157.457	143.527	174.138	167.045	108.561	71.6614	102.519	114.923	43.7436	108.25	111.172	94.7799	66.739	0	0	31.9427	36.8505	11.7629	0	33.0287	Longitudinals lacking protein, isoform G
NonamEVm003063t1	90.66	-2.44	0.867266	0.000271	0.00613	204.848	101.284	88.0001	153.839	138.899	81.0634	218.427	147.81	112.798	146.955	86.6195	94.0637	95.3621	101.707	85.4486	0	0	4.66457	29.4681	50.9733	0	52.3748	NA
NonamEVm003098t1	148.79	-2.23	0.769877	0.000395	0.00787	522.506	176.856	173.892	239.757	235.422	265.772	226.791	223.608	172.91	177.397	111.878	124.504	83.3162	174.192	83.8946	0	0	22.4186	97.2925	30.4333	30.8984	99.5609	Transposon Ty3-I Gag-Pol polyprotein
NonamEVm003169t1	280.55	8.72	4.55	2.29e-05	0.00102	0	0	0	6.29347	0	9.30608	0	0	0	0	0	0	24.7562	1.55357	0	415.639	65.7302	5107.81	479.192	26.4314	0	35.4754	Phosphoethanolamine N-methyltransferase
NonamEVm003209t1	32.34	-2.96	1.3918	0.000299	0.00651	28.5615	81.9673	54.1969	46.5384	53.2571	9.74234	107.912	137.227	14.5215	43.8947	3.23408	21.2414	6.97455	78.7452	6.45823	0	0	0	2.08134	6.20031	0	8.70136	Transposon Ty3-G Gag-Pol polyprotein
NonamEVm003230t1	37.82	-2.23	0.653972	8.06e-05	0.00257	82.0658	72.437	57.9836	46.3525	46.2915	51.2305	59.1532	29.0958	57.2606	65.7375	41.2114	46.0601	38.409	48.8379	39.1416	0	0	20.8288	14.0768	4.86006	0	11.0444	Cyclin-K
NonamEVm003242t1	210.34	2.5	0.779484	7.62e-05	0.00245	57.4648	21.0488	60.8319	58.2263	195.182	79.7314	251.749	221.057	246.953	211.823	64.069	263.676	65.5736	195.774	201.946	79.7247	1250.84	446.657	99.5109	136.813	271.137	147.7	Cytochrome P450 2U1
NonamEVm003300t1	97.65	2.79	1.05573	0.000143	0.00397	12.4563	2.35883	46.4956	50.9852	16.9473	31.8643	14.5677	17.1696	12.6526	20.0343	59.8166	30.9813	3.64523	24.4032	47.7623	766.241	0	522.131	260.604	88.1513	58.8007	60.2636	NA
NonamEVm003308t1	2157.4	3.38	0.852596	2.66e-07	2.86e-05	206.203	352.247	228.448	289.421	3145.7	690.51	4298.85	1937.77	1601.66	3669.55	884.93	2307.48	2667.23	1046.15	3033	10668.2	1347.02	5540.12	2242.87	256.475	460.844	588.125	Chitin deacetylase 1
NonamEVm003334t1	180.12	-2.88	1.07177	0.000101	0.00309	848.705	1304.53	185.944	247.517	38.1727	801.301	85.2688	10.3732	48.7013	69.4391	82.4908	5.87873	8.76914	13.1034	10.4675	95.5599	0	19.7435	54.8089	11.2574	0	20.6896	NA
NonamEVm003335t1	62.82	2.9	0.808667	5.73e-06	0.000361	9.85259	11.2752	24.2638	40.154	79.5606	29.0606	55.0991	18.087	23.1913	23.8816	33.2594	102.136	10.4928	25.3472	49.1796	201.959	178.741	406.841	55.8479	0	0	3.82656	NA
NonamEVm003415t1	26.04	-2.66	1.21768	0.000554	0.0097	1.78014	16.5145	93.0387	79.6016	25.267	69.7759	69.5264	21.5743	25.3009	18.7346	18.3386	20.0754	27.7674	49.9446	22.5939	0	0	0	2.07288	10.8768	0	0	NA
NonamEVm003435t1	53.12	-3.22	1.52449	0.000177	0.0046	272.014	144.959	79.8338	59.6438	12.3174	399.736	3.74292	13.7318	8.09348	18.735	97.6583	2.23313	3.18984	0.580861	3.83658	0	0	0	8.29242	13.0564	0	27.0236	NA
NonamEVm003448t1	144.15	-3.41	1.34838	4.04e-05	0.00157	52.8965	11.8627	2203.83	123.223	64.7319	96.0838	97.1038	23.6953	47.9429	42.6508	39.7217	99.9344	61.6388	51.7485	46.6081	0	0	18.7435	54.1212	6.57124	0	28.2487	Serine incorporator 1
NonamEVm003468t1	218.69	6.92	1.46732	1.47e-09	2.72e-07	0	7.20326	8.58375	4.89992	16.579	6.07259	12.3444	5.49878	22.0026	12.743	4.87469	16.6581	20.2332	8.82956	3.91017	3312.18	1299.42	31.59	17.4886	0	0	0	Glucose dehydrogenase [FAD, quinone]
NonamEVm003542t1	2017.78	9.99	1.4875	9.44e-14	4.88e-11	5.45659	5.81589	12.9081	73.6351	6.65089	37.2073	5.33561	5.32424	6.96577	0	33.8959	14.0255	165.031	3.98877	2.50962	6388.78	880.718	25821.2	10896.3	5.90562	0	19.4134	NA
NonamEVm003544t1	50.5	-3.22	1.38931	0.000106	0.0032	144.851	56.351	20.4766	74.7008	19.3579	16.5173	248.791	104.962	51.7789	147.887	8.13517	31.377	46.9671	36.327	75.0462	0	0	0	3.17307	15.7568	0	8.59564	NA
NonamEVm003551t1	31136.2	10.38	1.74052	1.47e-11	4.55e-09	47.8253	7.8899	174.762	218.808	1.40718	0	1.46933	1.38729	0	0	0	0.790109	99.6482	1.93528	1.30281	180283	234414	116966	63295.9	35564.9	14840.8	39074.1	NA
NonamEVm003589t1	105.55	4.23	1.50496	4.29e-06	0.000284	6.85637	7.95225	9.5721	4.24956	5.36991	35.7069	18.7244	5.77144	19.6644	18.3357	58.4383	13.0263	136.507	23.863	16.3659	383.276	0	1300.75	221.177	20.4856	0	16.0576	NA
NonamEVm003598t1	74.76	3.15	0.957059	7.45e-06	0.000433	14.5119	12.8989	12.7156	26.6196	33.2907	79.4154	35.3683	35.1747	26.3084	48.7424	40.6447	154.465	4.6434	16.5809	35.1645	270.978	162.15	489.688	105.129	16.9232	0	23.2925	Kynureninase
NonamEVm003626t1	159.76	-3.16	1.10572	2.84e-05	0.00121	578.457	515.984	90.2162	359.768	122.454	59.2448	148.506	188.296	112.083	113.801	459.038	185.688	18.5724	49.954	135.556	0	0	7.41717	45.9966	29.3511	179.087	115.168	NA
NonamEVm003665t1	69.37	2.77	1.30153	0.000467	0.00865	0	0	7.03778	36.8404	1.79046	0	25.3981	35.8138	27.4446	19.3193	2.95323	43.2222	116.869	133.883	76.6356	0	92.7825	6.57768	158.617	102.199	399.606	239.073	NA
NonamEVm003724t1	146.31	3.45	1.19873	1.25e-05	0.000659	32.6421	22.6961	13.3193	11.3134	36.8312	125.537	28.0214	7.27591	6.12589	1.27758	13.1916	51.4765	72.911	10.0991	8.00796	2178.04	150.745	401.488	47.8672	0	0	0	Chitotriosidase-1
NonamEVm003776t1	104.04	-5.23	1.42964	8.65e-08	1.15e-05	665.751	453.427	295.419	262.036	60.2477	203.496	31.3438	13.7158	20.027	44.4436	116.396	24.9051	38.1996	4.26213	39.6957	0	0	0	13.6907	0	0	1.77442	NA
NonamEVm003797t1	4519.04	2.85	0.760394	3.83e-06	0.000255	236.719	272.442	512.273	983.699	4395.85	1042.66	684.391	7453.41	3509.34	1294.72	772.412	5483.29	6165.57	5192.89	2722.26	1641.82	4491.2	4083.81	6754.34	22018	12590.9	7116.96	Tubulin alpha chain
NonamEVm003839t1	508.06	-3.84	1.26691	3.41e-06	0.000231	4152.15	2666.07	393.459	752.222	235.24	970.323	126.337	62.0389	186.886	193.332	537.573	125.347	131.278	109.146	134.263	0	0	25.327	211.659	39.834	105.867	18.9981	EH domain-containing protein 2
NonamEVm003872t1	24.31	-3.89	2.00435	9.29e-05	0.00288	108.468	121.411	95.8154	96.9389	1.53998	5.96687	4.15953	0.981075	4.0476	1.93855	86.9152	3.07143	0.45582	0	1.27915	0	0	0	0.691197	0	0	1.03969	Enteropeptidase
NonamEVm003884t1	44.46	-2.95	1.07205	6.86e-05	0.00228	109.816	127.147	38.4163	80.4314	83.6124	23.3726	63.1302	44.2987	67.6636	62.3318	34.4285	37.6754	31.7926	69.5768	50.6324	0	0	0	9.49791	38.4622	0	5.75071	NA
NonamEVm003999t1	1795.29	3.94	1.3654	4.72e-06	0.000308	107.257	241.184	197.934	266.032	14.994	102.156	67.0266	31.6024	44.7566	93.2535	59.7482	40.7713	3945.03	24.7688	47.3483	13954.8	1871.32	11312.3	5258.27	394.193	498.794	922.977	NA
NonamEVm004033t1	31.29	-3.24	1.74055	0.000288	0.00634	247.356	130.91	18.8904	43.5227	2.15673	1.99204	13.7352	0	3.54219	16.1531	60.6027	4.4638	0.910917	0	0	0	0	0	3.45546	42.4313	45.2302	52.9616	Acid sphingomyelinase-like phosphodiesterase 3b
NonamEVm004071t1	311.44	-3.14	1.48825	0.000207	0.00508	1474.53	654.646	133.44	780.081	67.1919	1352.82	501.982	204.718	70.9328	178.126	194.805	892.71	12.4745	50.2406	186.93	0	0	6.29759	54.8746	0	0	34.7716	Leukocyte elastase inhibitor A
NonamEVm004099t1	57.7	-2.14	0.739459	0.000517	0.00926	218.046	133.439	99.2715	90.5034	84.9259	127.709	70.3341	16.6354	55.1192	48.198	77.3466	34.731	40.8218	46.8059	31.4002	0	0	52.7556	24.0932	12.3009	0	4.89058	Transcription initiation factor TFIID subunit 1
NonamEVm004110t1	3498.89	5.29	1.36927	3.66e-08	5.3e-06	64.9565	119.602	448.152	79.4452	30.1575	41.219	48.85	9.45491	28.5607	76.6984	35.3004	20.3453	880.695	10.5509	18.5371	22411.1	35068.2	8646.56	2277.9	1987.21	1254.47	3417.57	NA
NonamEVm004196t1	363.89	-6.01	1.89317	5.04e-07	4.83e-05	1738.63	2974.46	325.113	313.115	16.3202	1934.75	18.2977	23.5409	39.4555	48.4534	237.172	85.1463	66.0814	25.5587	54.5655	0	0	0	28.3332	16.3212	0	60.2916	Clotting factor B
NonamEVm004273t1	547.03	2.7	0.853946	4.55e-05	0.00167	87.6507	142.623	50.7372	303.877	334.988	434.866	637.288	171.653	251.437	716.925	212.189	352.579	1966.2	227.538	375.9	1879.82	123.454	2369.87	522.94	251.155	82.5996	538.397	NA
NonamEVm004275t1	113.48	-4.06	1.59162	1.29e-05	0.000676	832.726	877.087	142.445	211.414	10.3681	102.974	15.9199	7.62432	24.6739	17.6473	185.732	3.69828	12.3876	9.59479	11.4987	0	0	0	30.7332	0	0	0	NA
NonamEVm004289t1	383.75	-4	2.17222	0.000106	0.00319	95.173	143.816	1874.44	2010.99	15.964	0	45.236	112.222	124.268	33.642	365.713	2629.77	2.44494	203.235	323.886	0	0	0	15.0015	17.1448	170.661	258.793	NA
NonamEVm004304t1	732.78	21.83	2.18246	1.56e-24	4.82e-21	0	0	0	3.86898	3.99496	0	732.731	2548.73	619.526	279.668	1.86817	854.282	2931.45	1492.5	1583.03	0	271.543	1180.43	1134.39	646.008	0	1837.26	Myosin heavy chain, striated muscle
NonamEVm004324t1	24.45	3.26	1.23908	4.15e-05	0.00158	0	0	8.10007	0	8.77657	0	9.30206	23.325	28.9487	11.7729	13.8351	38.4137	22.5357	16.0313	15.9401	142.638	73.6688	100.533	15.6746	3.32409	0	4.98526	NA
NonamEVm004340t1	832.75	3.36	0.954226	1.72e-06	0.000132	203.21	113.358	168.898	124.509	850.791	69.9455	552.687	115.715	368.56	474.25	140.373	375.247	277.901	234.041	405.063	10942.6	968.542	1072.81	661.981	42.414	99.6352	58.0292	All trans-polyprenyl-diphosphate synthase PDSS2
NonamEVm004348t1	226.66	-3.86	1.1116	5.84e-07	5.42e-05	1198.58	639.912	174.471	767.85	103.054	613.912	219.295	99.5696	85.4527	125.937	363.573	168.785	79.7942	49.1681	85.6772	0	0	20.1774	51.2086	27.6532	31.8099	80.6132	Glia-derived nexin
NonamEVm004369t1	51.36	-2.57	0.995801	0.000313	0.00666	276.699	51.5101	36.7857	178.451	43.3233	48.3893	70.8904	51.6471	60.0715	59.7998	18.003	26.3157	41.8034	38.3518	25.5926	41.2324	0	0	10.33	32.529	0	18.1433	Retrovirus-related Pol polyprotein from type-2 retrotransposable element R2DM
NonamEVm004380t1	32.23	-3.41	1.82738	0.000213	0.00519	108.44	117.239	76.2223	46.4648	7.8432	178.89	4.32169	2.03339	6.65975	0.446377	91.2718	8.17346	3.90282	0.80279	0.883597	0	0	0	1.43251	0	39.0075	14.995	Scavenger receptor class B member 1
NonamEVm004407t1	937.14	4.4	1.05358	1.12e-08	1.79e-06	31.3872	11.9829	31.1138	112.399	161.955	26.8455	220.32	207.961	285.359	194.589	38.7792	654.488	546.384	681.408	398.794	405.71	35.0403	883.02	2453.72	5728.88	3569.59	3937.37	Alpha-crystallin A chain
NonamEVm004411t1	80.94	-2.82	1.13789	0.000194	0.00483	463.25	324.796	51.1032	97.7633	117.338	60.0415	55.5255	22.3473	54.7828	56.2799	111.492	58.4242	152.413	43.3015	58.1022	0	0	0	38.9796	14.7375	0	0	Acyl-coenzyme A diphosphatase FITM2
NonamEVm004475t1	60.96	4	2.18496	0.000108	0.00322	0	1.1161	1.37465	0	180.108	1.88346	201.142	21.3637	45.9878	59.9561	0	197.067	34.0909	9.35129	98.0981	192.379	115.921	140.804	40.5735	0	0	0	All trans-polyprenyl-diphosphate synthase PDSS1
NonamEVm004586t1	1235.82	2.94	0.99613	3.88e-05	0.00152	152.61	214.95	153.581	392.645	924.719	342.988	1372.96	319.49	540.463	1154.05	565.659	471.51	6537.25	332.155	672.369	6944.56	154.061	3430.46	2257.94	76.2495	18.3587	158.948	NA
NonamEVm004698t1	51.4	-3.01	1.40916	0.000261	0.00599	388.418	219.261	62.1763	75.5931	13.1061	134.485	3.73092	2.2037	10.2208	16.911	92.473	5.02388	3.07524	2.61008	2.19213	0	0	0	16.584	44.0098	0	38.6974	Innexin inx3
NonamEVm004733t1	78.46	-2.22	0.741431	0.000303	0.00653	245.181	221.598	143.189	116.875	49.5676	52.3172	58.3701	69.4652	79.2259	88.3674	83.6964	41.6933	46.2699	113.159	68.2277	0	0	31.6937	55.3178	40.7239	17.2979	103.78	Transcription factor Sox-8
NonamEVm004736t1	4293.82	5.15	1.65264	7.36e-07	6.34e-05	5.34415	0	161.467	479.225	313.331	1.99443	1142	2377.64	2413.91	1548.14	128.495	3829.55	4561.45	5626.43	3802.56	2864.33	225.623	5316.05	13612.1	20764.6	7173.85	18115.9	NA
NonamEVm004740t1	130.68	-7.24	1.9065	6.19e-08	8.72e-06	319.57	515.801	227.176	202.528	1.86428	1486.11	46.8536	7.41477	3.06127	13.6775	20.4352	16.283	5.47876	5.8548	2.06823	0	0	0	0.6966	0	0	0	Phenoloxidase-activating factor 3
NonamEVm004780t1	26.52	-4.43	1.87601	1.58e-05	0.000784	239.889	27.1047	33.3575	136.669	11.7051	15.878	22.4519	11.7863	24.2971	25.2244	0	10.355	12.7915	8.14325	2.98726	0	0	0	0.691915	0	0	0	NA
NonamEVm004791t1	95.01	2.65	1.13013	0.000423	0.00816	5.1431	2.5583	38.8955	21.2564	57.5853	11.487	42.3261	25.5278	31.5854	8.01886	24.558	166.041	70.4503	8.72334	35.0676	1268.48	73.3435	8.96359	45.2068	105.163	29.4304	10.5195	Fringe glycosyltransferase
NonamEVm004845t1	1123.63	4.05	2.96346	0.000299	0.00651	0	0	39.2908	2.22498	101.697	0	3.21955	183.852	0	0	0	6.78604	0	9.33953	72.5438	4995.51	7367.23	8242.66	2540.02	589.222	134.355	431.915	NA
NonamEVm004859t1	3477.24	3.2	1.05811	1.49e-05	0.000763	14.2913	180.627	1640.68	200.265	894.091	224.578	85.2502	410.664	653.739	28.3063	147.539	776.757	317.124	736.455	525.15	25088.6	12314.2	10358.7	7332.18	5733.44	4345.42	4491.28	NA
NonamEVm004906t1	62.25	-20.88	3.17378	4.79e-12	1.61e-09	447.755	266.644	177.289	118.945	1.0547	39.6455	2.37178	0	0	0	311.061	0	0	0	0	0	0	0	0	0	0	4.77112	Tenascin-N
NonamEVm004984t1	85.15	-3.04	1.67832	0.000452	0.00851	205.957	145.52	19.1027	152.917	24.2404	972.209	32.7404	3.48568	8.87358	23.945	37.2385	219.339	0.868303	7.18522	15.8145	0	0	0	3.76734	0	0	0	Phenoloxidase-activating factor 3
NonamEVm005000t1	11029.9	10.74	1.40614	2.76e-16	2.52e-13	20.5595	5.90807	55.1916	7.19018	6.24134	0	2.08352	13.7546	10.6869	0	0	0.511233	12.5099	0	2.47228	50478.1	154557	19098.2	9997.8	4919.2	1387.6	2083.42	NA
NonamEVm005104t1	178.76	4.51	1.87487	1.28e-05	0.000673	0	14.6982	12.5272	15.2334	3.14695	0	4.67309	7.02253	0	0	0	0	0	0	0	926.011	241.83	2027.26	477.51	24.4861	170.839	7.4526	Glutamine synthetase
NonamEVm005110t1	33.85	-3.41	1.0591	4.39e-06	0.000288	81.2529	73.6567	37.8439	48.0627	34.6377	100.294	64.5001	28.6034	75.1392	78.6598	33.9013	16.098	22.5843	15.0562	26.0049	0	0	0	4.29887	0	0	4.04002	STE20-related kinase adapter protein alpha
NonamEVm005115t1	1458.58	7.89	2.0891	7.76e-08	1.06e-05	10.7799	9.43666	8.00316	141.977	18.2978	31.9462	0	4.85547	8.32798	3.66501	17.3706	51.6962	10830.2	22.041	26.2606	7155.59	12726.7	643.184	170.573	101.23	0	106.604	NA
NonamEVm005119t1	56.88	19.27	2.94646	8.18e-12	2.64e-09	0	0	0	3.72971	0	0	0	0	0	0	0	4.7565	85.8657	2.32698	0	0	202.782	0	412.456	197.257	151.485	190.736	Histone-lysine N-methyltransferase SETMAR
NonamEVm005137t1	48.04	2.56	1.04888	0.000437	0.00834	8.09023	3.84789	3.68588	3.82355	119.871	38.9225	85.1148	52.9421	43.9008	72.9859	33.823	90.6399	81.0189	12.8046	46.2224	0	172.486	141.735	15.0338	14.8116	0	15.1978	NA
NonamEVm005232t1	268.31	-2.61	1.03074	0.000313	0.00666	1213.19	790.023	164.119	668.859	85.0316	1178.16	340.789	23.5492	95.1413	253.994	669.543	66.1743	30.9956	25.5677	94.6745	93.8049	0	43.4812	47.7002	9.79592	0	8.31667	CLIP domain-containing serine protease HP8
NonamEVm005300t1	3714.79	4.39	0.815565	1.77e-11	5.37e-09	178.046	511.091	521.829	460.46	1490.96	362.38	367.776	710.429	1215.56	445.256	1959.73	3131.32	2354.27	1279.04	1935.75	24759.1	14585.4	4201.11	6312.12	4949.85	2614.07	7379.79	SPARC
NonamEVm005353t1	179.02	2.24	0.710027	0.000187	0.00475	64.3563	116.934	67.9216	78.9887	89.7938	173.81	73.9409	62.3523	50.6823	75.6701	121.104	58.4276	133.572	16.9237	76.5692	1738.32	451.024	236.135	132.394	35.5429	27.9323	56.0404	Glutaminyl-peptide cyclotransferase
NonamEVm005377t1	312.69	-2.27	0.829319	0.000521	0.00929	255.335	406.691	433.335	625.396	347.912	627.7	674.419	572.502	361.573	992.418	125.738	132.539	84.0322	640.907	328.705	0	0	81.0507	61.1044	34.4706	64.2982	29.1198	NA
NonamEVm005411t1	38.99	-20.45	3.06472	2.82e-12	1.04e-09	229.561	184.345	49.67	86.2378	1.54204	17.8136	0.746199	0.440614	0	0	287.493	0	0	0	0	0	0	0	0	0	0	0	Plasma kallikrein
NonamEVm005419t1	23.24	4.17	1.71488	1.64e-05	0.000803	0	1.15155	2.83259	0	1.80648	0	8.28812	8.16766	2.47465	7.71997	3.12148	9.31853	24.1571	2.27619	6.6784	320.681	19.618	78.5704	12.1834	2.13249	0	0	NA
NonamEVm005455t1	86.7	-6.75	2.92473	7.58e-06	0.000436	811.257	425.853	229.454	185.315	0.616586	33.8016	1.66491	0	1.51964	2.58844	210.787	0.279844	0	1.74572	2.56189	0	0	0	0	0	0	0	NA
NonamEVm005518t1	505.25	7.5	1.04123	9.26e-16	7.56e-13	9.05305	4.79858	16.2662	12.2007	52.7563	4.05717	36.7729	25.9599	27.8676	22.7112	63.717	38.6246	511.824	18.7676	63.8117	1589.07	4390.14	2486.62	1177.87	241.287	139.791	181.432	Glutaredoxin domain-containing cysteine-rich protein CG12206
NonamEVm005596t1	44.81	2.62	1.11627	0.000454	0.00851	5.83324	10.7326	7.53526	1.01966	4.16441	0	5.65675	28.4604	2.07717	1.68733	52.0251	24.2017	11.8172	3.79541	5.32704	128.246	464.328	10.1678	18.8398	35.7701	120.509	43.6328	Retinol dehydrogenase 12
NonamEVm005847t1	1926.41	5.26	1.54224	2.29e-07	2.56e-05	44.0722	38.0448	180.868	103.67	25.8733	36.7359	113.296	43.1622	40.408	125.073	32.378	4.37047	3108.72	14.3865	20.9661	8315.48	12203.1	8953.27	3440.34	2466.12	1460.2	1610.4	NA
NonamEVm005860t1	243.75	4.93	2.53689	3.82e-05	0.00151	0	2.20421	0	1.16169	117.776	0	22.1615	32.4596	129.572	28.6133	96.8348	57.8044	3897.37	75.316	59.2896	372.884	295.165	109.334	45.4663	0	19.0105	0	NA
NonamEVm005913t1	227.12	-3.35	1.27995	3.62e-05	0.00146	1674.4	540.82	158.704	328.132	255.002	349.383	70.9674	55.5279	142.26	118.578	516.453	157.557	224.79	82.2634	115.777	0	0	6.91732	76.7072	36.3654	0	85.9998	Tumor suppressor candidate 3
NonamEVm005998t1	197.42	-3.04	1.06587	3.88e-05	0.00152	113.739	484.056	268.573	198.406	341.245	1153.14	479.754	83.113	273.159	409.579	227.219	47.9223	11.9659	53.4555	36.7869	58.3385	0	11.5625	6.03749	35.9001	0	49.2137	Failed axon connections homolog
NonamEVm006024t1	58.46	-3.29	1.1765	2.38e-05	0.00106	40.8955	128.469	32.296	186.062	106.508	152.755	236.894	34.7589	53.4894	91.0939	22.0604	70.6786	21.0386	13.5224	70.5345	0	0	0	4.13048	8.29113	0	12.6397	2-oxoglutarate-Fe(II) type oxidoreductase ppzD
NonamEVm006040t1	49.84	-4.64	2.58405	6.85e-05	0.00228	327.179	160.783	105.28	125.246	4.21918	27.3118	1.41298	0	3.0108	11.1386	319.449	0	0.952231	0.494287	6.37445	0	0	0	0	0	0	3.54544	NA
NonamEVm006115t1	3550.25	7.73	1.14152	1.87e-14	1.16e-11	15.4075	31.7613	132.753	17.625	893.62	35.796	216.136	364.521	245.818	237.447	32.1974	545.367	401.045	99.8729	386.215	11227.1	43584.6	12201.4	3054.42	1241.93	1740.18	1400.34	NA
NonamEVm006136t1	43.12	7.82	2.6698	1.21e-06	9.73e-05	0	0	0	5.41894	4.63223	2.79449	13.9788	5.6479	0.4225	2.16316	0	5.36893	5.77597	2.43351	2.14027	865.422	0	30.5308	1.96467	0	0	0	Cadherin-87A
NonamEVm006187t1	26.26	3.64	2.39415	0.00032	0.00678	0	0	1.61488	7.44843	18.7976	0	3.77119	2.18574	3.01713	0	34.8624	27.07	42.7701	0.994722	2.19008	400.081	0	27.6015	5.38936	0	0	0	NA
NonamEVm006216t1	127.41	-3.8	1.55524	2.55e-05	0.00112	1551.87	478.219	144.69	273.103	11.0779	104.333	7.02952	1.38396	12.3761	17.3834	122.899	4.01361	9.95141	7.75857	5.25644	0	0	25.5405	23.1058	0	0	2.93013	NA
NonamEVm006222t1	194.89	2.9	1.51791	0.000512	0.00923	6.03261	0	45.5178	31.796	3.16724	0	10.2401	10.2831	10.107	2.53782	1.56461	17.3656	24.5047	23.5972	6.41772	1626.4	0	1385.28	30.3252	107.967	938.896	5.48606	NA
NonamEVm006251t1	168.31	-2.65	1.02724	0.000245	0.00575	313.468	82.9603	138.387	275.804	245.349	106.314	482.491	403.58	278.954	231.703	27.7053	253.108	193.832	288.527	230.549	0	0	11.0609	22.7843	89.2011	0	27.0016	NA
NonamEVm006255t1	43.27	-2.53	0.988157	0.000383	0.0077	152.001	51.6732	32.458	71.0011	75.3819	39.8331	102.367	103.614	46.2354	53.2424	13.6278	42.058	39.6821	48.3625	28.901	0	0	0	11.8214	22.0176	0	17.701	NA
NonamEVm006292t1	1234.5	4.62	0.757117	1.8e-13	8.21e-11	102.92	148.404	124.03	148.29	284.134	158.795	146.612	214.865	348.712	257.982	553.397	1025.83	929.215	533.326	575.395	9655.27	3445.88	1455.06	2355.68	1002.84	520.061	3172.4	Insulin-like growth factor-binding protein-related protein 1
NonamEVm006339t1	22.61	-2.83	1.15821	0.000201	0.00495	47.992	53.0384	44.9783	59.6469	12.0133	93.3585	96.4801	7.3639	3.0368	28.4506	15.1582	13.4233	2.28251	8.72189	8.10626	0	0	0	3.4585	0	0	0	NA
NonamEVm006383t1	37.39	2.97	1.1735	0.000116	0.00341	0	7.27785	12.4035	13.0017	22.898	8.1394	7.50721	11.63	6.78325	1.33469	43.3421	21.9702	3.78132	4.80339	7.92477	96.5194	476.615	58.7597	15.8326	0	0	2.16115	Protein Star
NonamEVm006470t1	92.83	2.66	1.07102	0.000301	0.00651	12.4061	20.0597	26.1229	36.1361	16.3302	17.987	45.3605	16.5938	31.4416	30.272	0.399524	35.4433	90.9689	18.0412	52.7443	344.848	0	645.825	437.252	11.9895	129.228	22.8715	NA
NonamEVm006520t1	20.57	14.71	2.4474	1.68e-10	4.22e-08	0	0	0	0	22.1746	3.97072	23.2824	0	0	14.2246	335.447	6.15329	28.3071	2.32579	2.1331	0	0	12.3937	2.07503	0	0	0	NA
NonamEVm006544t1	65.49	-2.62	0.920682	0.000143	0.00397	143.704	121.853	80.7766	123.067	104.971	64.7268	46.3166	61.2673	53.2473	27.719	239.237	37.2766	63.9395	25.7065	72.717	0	0	4.14996	18.9964	15.3234	102.704	33.0758	Glyoxalase domain-containing protein 4
NonamEVm006547t1	28.72	-6.57	1.62443	2.15e-08	3.24e-06	302.264	110.919	15.8992	62.9207	10.8141	35.8374	12.9232	7.87305	13.1821	9.06442	11.9142	4.21025	2.73985	8.75712	18.3338	0	0	0	0	0	0	4.1815	NA
NonamEVm006585t1	22.3	-2.61	1.07736	0.000391	0.00783	81.415	51.2255	33.4047	58.4005	11.238	48.5652	39.6194	8.39956	39.2109	39.6451	24.1802	3.05053	8.17294	28.8792	9.19659	0	0	0	5.91623	0	0	0	NA
NonamEVm006614t1	64.81	-2.88	1.02508	7.32e-05	0.00239	300.196	142.074	52.5937	102.567	50.2907	181.506	93.571	56.1895	69.9841	83.1271	72.5694	22.7292	36.4978	32.1357	28.6334	0	0	0	23.3586	45.7192	0	32.0662	NA
NonamEVm006622t1	46.3	6.08	1.88494	4.17e-07	4.12e-05	0	1.18059	1.45465	1.24479	62.609	3.98848	38.3318	10.3092	32.4183	41.3927	8.38107	18.4304	48.3238	7.55883	21.7658	297.405	52.7146	280.094	85.7795	0	0	5.19702	Boophilin-G2
NonamEVm006625t1	781.48	7.42	1.46864	3.61e-10	7.89e-08	2.43746	0	40.9695	5.10793	42.0933	0	6.69582	29.649	31.8498	4.41857	19.3476	64.0698	835.881	9.53195	115.669	5478.8	3369.47	5148.95	1491.18	282.415	60.3832	153.56	NA
NonamEVm006676t1	44.98	-4.25	1.53212	4.68e-06	0.000306	311.257	155.614	92.9432	33.5605	11.7042	153.25	7.48851	14.7123	7.5887	9.04474	119.193	5.30207	10.4779	6.38934	5.96828	0	0	0	6.21933	14.1436	11.3027	13.5056	Angiopoietin-4
NonamEVm006693t1	133.59	-2.52	0.753551	4.45e-05	0.00165	179.559	341.87	294.453	229.824	161.736	231.467	209.486	78.7613	159.467	245.14	193.411	81.3526	39.2329	78.7456	117.491	0	0	17.8331	70.1074	39.7121	78.8675	90.466	Carbonyl reductase [NADPH] 3
NonamEVm006742t1	130.25	-2.3	0.839451	0.000489	0.00893	324.45	60.4508	124.204	107.841	132.483	157.252	378.085	401.659	154.261	118.803	33.3364	172.959	133.666	130.424	131.005	0	0	21.823	35.9137	93.379	40.0927	113.502	NA
NonamEVm006823t1	677.13	10.01	1.85743	2.44e-10	5.67e-08	0	0	0	7.77369	1.6836	0	2.97358	37.8135	27.6536	10.3892	2.28551	234.353	182.665	119.97	71.9839	488.775	0	149.861	1102.48	4961.01	6207.51	1287.7	NA
NonamEVm006871t1	425.41	11.54	1.80079	2.82e-12	1.04e-09	0	0	0	16.1552	20.6595	3.95503	32.4281	226.641	43.612	33.078	719.85	284.293	2927.25	42.0156	300.379	1203.82	2798.63	401.232	69.4018	67.8065	146.893	21.005	NA
NonamEVm006879t1	96.92	2.6	0.90595	0.000138	0.00389	16.7519	16.3826	10.7601	4.60611	95.6742	33.1648	50.6432	52.9159	78.325	129.913	105.601	115.23	409.875	50.8426	102.959	246.184	185.922	138.019	212.358	8.48947	0	67.5833	NA
NonamEVm006958t1	23.41	5.49	6.77021	0.000481	0.00884	0	0	0	0	0	0	0	0	0	0	0	0.274866	0	0	0	0	0	0	90.9256	248.008	0	175.846	NA
NonamEVm006966t1	114.22	-5.85	1.77639	3.3e-07	3.42e-05	1049.69	352.542	281.844	223.775	16.633	165.318	9.57068	25.0035	28.3289	3.22954	201.28	18.9631	23.6739	22.6465	29.4091	0	0	0	8.29027	15.2263	0	37.3671	NA
NonamEVm007024t1	33.48	-2.97	0.942042	1.95e-05	0.000913	134.146	69.5664	59.5887	52.0536	26.3748	35.298	71.844	45.8866	53.4485	44.8879	22.0061	24.2312	19.0785	41.0889	13.3898	0	0	0	10.5235	6.2131	0	6.92397	Zinc finger Y-chromosomal protein
NonamEVm007048t1	8841.56	9.06	2.42437	1.32e-07	1.65e-05	42.1844	13.166	56.2202	121.457	0.286779	5.54349	0	0	0	0	157.125	0	4.25322	0.541534	0	50003.2	108115	22735.1	8612.72	2387.41	1203.28	1056.27	NA
NonamEVm007057t1	917.05	-3.08	1.37092	0.000171	0.0045	9581.55	2939.86	386.501	850.426	38.1392	3984.91	24.2055	42.416	44.5378	151.098	1217.21	25.9344	25.0493	51.3147	6.51831	0	274.878	105.399	104.629	44.3032	66.8251	209.399	Agrin
NonamEVm007114t1	71.32	7.35	2.66677	1.96e-06	0.000146	0	0	1.99426	0	5.91866	0	12.5179	1.11207	2.70062	12.3965	5.10782	2.29066	6.07038	0	6.11345	310.93	1136.88	0	20.4937	9.25468	0	35.1865	NA
NonamEVm007133t1	117.33	6.83	3.3086	1.53e-05	0.00077	0	0	0	0	55.4093	0	5.39512	91.0091	46.0722	2.5903	414.051	557.414	0.917533	108.374	293.071	858.387	84.9912	0	39.4978	0	0	24.1254	NA
NonamEVm007186t1	41.23	4.31	2.77808	0.00016	0.00431	0	0	0	0	1.55188	0	82.5089	68.1992	59.8339	15.0393	0	56.3435	122.027	39.4059	96.4261	306.388	0	5.13632	52.1262	0	0	2.16919	Myosin heavy chain, muscle
NonamEVm007324t1	54.6	5.96	2.50959	6.97e-06	0.000414	0	0	1.38997	2.77586	0	0	3.25073	5.09926	8.7379	3.10196	0	25.3856	405.008	5.57983	54.1012	344.578	193.089	94.9474	27.2125	24.5172	0	2.33843	NA
NonamEVm007340t1	44.29	-3.4	1.10848	7.44e-06	0.000433	298.207	235.964	41.6026	48.3305	18.3162	30.8319	42.8989	46.329	13.3676	33.8387	23.0267	34.0062	25.0707	21.5485	16.7988	0	0	0	18.1564	9.212	0	16.808	NA
NonamEVm007412t1	614.79	9.48	1.18228	3.58e-18	5.05e-15	1.96183	0	7.99484	0	0	0	0	0	0	0	0	0	0	0	0	3251.46	1504.12	4231.53	2452.86	1025.07	429.765	620.557	NA
NonamEVm007463t1	315.89	5.96	4.98209	0.0002	0.00495	0	0	0	0	0	0	0	0	0	0	0	0	0	0	0	1235.34	832.853	3259.35	1398.5	110.048	0	113.545	NA
NonamEVm007523t1	53.31	7.42	2.28798	4.22e-07	4.14e-05	0	0	1.68327	0	4.47213	1.69261	7.47642	1.68843	0.86876	1.51451	5.60013	6.51338	45.6575	0	2.56592	145.644	590.738	336.228	12.1562	2.55371	0	5.73306	NA
NonamEVm007551t1	967.15	-2.33	0.796452	0.000276	0.00619	2297.48	3434.74	1028.75	3510.5	301.32	3889.71	761.407	230.478	379.163	598.401	1463.54	1035.45	137.602	179.992	466.544	287.048	381.97	231.983	77.4424	195.029	177.649	211.08	NA
NonamEVm007638t1	64201.4	13.44	1.59499	4.32e-18	5.58e-15	30.2292	9.4397	34.8185	143.053	8.331	1.98244	6.65924	39.9009	12.6825	2.59432	0	12.933	1757.09	13.4191	32.5208	124698	1.23568e+06	29213.6	13009.3	3555.39	1762.23	2402.02	NA
NonamEVm007685t1	72.14	-2.58	1.02215	0.000344	0.0071	225.665	77.6629	63.0417	84.8961	71.8527	63.0597	205.586	213.305	88.2762	123.69	27.8773	65.8406	58.7038	74.4774	61.617	0	0	0	19.7479	19.1043	0	42.7483	NA
NonamEVm007747t1	153.58	-2.66	0.798833	3.01e-05	0.00126	148.401	242.55	407.724	184.022	64.5827	247.176	192.684	231.465	63.4632	201.674	164.208	78.2695	44.5727	70.3536	47.7229	0	0	34.5015	43.6237	338.068	93.573	480.127	Dehydrogenase/reductase SDR family member 11
NonamEVm007752t1	31.88	3.06	1.34359	0.000166	0.00443	0	2.35909	2.90034	4.97396	1.54227	5.94431	3.32839	3.44739	8.62152	5.18729	0.799738	9.55774	1.37646	9.91607	0.855584	15.6424	162.975	49.4792	8.32523	44.8148	341.464	17.8221	NA
NonamEVm007755t1	25.06	-2.51	0.998668	0.000432	0.00828	59.2947	84.9631	24.1876	39.3929	30.654	63.166	39.3706	8.76247	37.8558	71.4002	35.128	7.31909	8.49791	14.1272	12.586	0	0	0	7.71486	0	0	6.99529	NA
NonamEVm007784t1	60.79	-2.84	1.25762	0.000296	0.00647	434.012	266.662	129.424	105.254	7.85907	150.044	5.06514	6.17308	12.3555	16.8387	122.644	1.13939	3.23482	7.34227	3.75334	0	0	23.3006	14.2525	4.58462	0	23.3338	NA
NonamEVm007834t1	20317.8	4.31	1.9628	2.9e-05	0.00123	0	29.1966	52.5374	2652.51	10.6403	0	7089.9	13928	3919.27	5057.48	277.273	3768.37	5559.26	8706.21	5984.3	466.149	464.286	219.502	10481.5	211475	15822.9	151026	Actin, muscle-type A2
NonamEVm007856t1	8790.07	3.2	1.52366	0.000188	0.00475	0	1.17926	277.001	22.3779	20.3502	0	8.3196	104.813	65.3869	3.88763	0	46.0418	60.0286	15.1534	64.1237	2079.87	9776.12	1027.23	4178.8	30144.5	69761.4	75724.8	Cuticle protein CP1158
NonamEVm007865t1	175.34	-3.05	1.1266	5.76e-05	0.00199	1659.88	440.954	127.621	207.508	47.2794	538.681	231.568	26.3776	87.2507	149.796	24.2269	68.2665	29.2144	15.4005	19.4783	0	0	85.8864	36.5159	3.44973	40.593	17.4733	NA
NonamEVm007995t1	29.57	-2.96	1.33928	0.000246	0.00575	90.3156	21.1729	35.6957	34.3769	20.7912	9.28768	101.902	77.501	41.1739	32.1141	1.87406	36.731	64.5774	27.6541	29.4975	0	0	0	2.04688	9.72689	0	14.0881	NA
NonamEVm008027t1	30.15	-3.04	1.18393	8.76e-05	0.00274	26.684	84.887	72.6302	182.735	11.7042	73.6782	71.5657	14.7087	7.58803	48.4445	23.1176	10.3197	9.10666	4.06495	7.24589	0	0	0	4.1453	7.61362	0	3.11458	NA
NonamEVm008053t1	1121.26	-2.08	0.56794	4.65e-05	0.00169	4528.33	3745.34	721.931	1650.06	569.01	2147.26	1369.82	1233.57	674.423	896.389	795.037	751.807	781.48	828.072	582.255	324.658	343.885	800.543	660.312	578.336	281.743	403.487	NA
NonamEVm008091t1	37.45	2.62	1.17708	0.000563	0.0098	14.4004	2.1058	6.89374	2.21973	12.2196	35.6504	14.4359	12.3554	6.23685	6.93042	11.682	11.4326	34.8454	2.43702	9.86322	0	546.407	72.7	2.89714	9.13073	0	9.03026	NA
NonamEVm008205t1	402.38	2.66	1.04067	0.000261	0.00599	12.7292	13.2586	52.2957	72.4202	112.629	44.6333	306.886	281.105	405.96	279.267	42.5649	956.409	484.546	650.518	713.425	293.632	0	196.878	1300.84	1347.35	175.653	1109.39	Glutathione S-transferase 1, isoform D
NonamEVm008236t1	9681.38	2.91	1.13916	0.000129	0.00373	312.198	1886.06	1729.44	359.14	2536.61	945.476	6145.37	1897.86	1050.43	7360.87	813.516	1445.53	53385.9	387.256	1762.24	42295.8	34691.1	27325.6	14178	4866.7	2100.03	5515.24	NA
NonamEVm008331t1	24.83	-4.18	1.73455	1.74e-05	0.000841	97.864	28.3014	42.136	26.1104	13.8628	219.112	7.49105	2.45175	16.1905	14.2124	26.7088	16.7357	11.384	6.96936	11.5098	0	0	0	0	0	0	5.19108	NA
NonamEVm008368t1	93.8	-2.46	0.815464	0.000145	0.00401	186.971	85.5783	133.648	240.877	92.5017	114.078	245.737	42.6807	75.4205	173.253	127.585	80.5774	67.9951	88.0397	68.7202	0	0	6.2419	30.5076	18.3117	85.907	98.8699	Thioredoxin domain-containing protein 12
NonamEVm008407t1	27.63	-3.44	1.43382	5.57e-05	0.00196	100.557	88.1309	125.713	39.5386	12.6156	137.886	2.66153	16.2029	11.2804	17.5017	19.3388	0.694953	0.7561	9.23377	3.81316	0	0	0	4.56429	9.49087	0	7.78247	Tyrosine-protein kinase Src64B
NonamEVm008513t1	225.37	8.51	4.30935	1.96e-05	0.000915	0	0	0	0	0	0	25.8154	84.3586	5.07815	28.5752	0	10.426	332.046	0	35.1331	2192	1219.35	568.909	456.557	0	0	0	NA
NonamEVm008517t1	4512.83	7.79	1.29859	2.58e-12	9.98e-10	3.57888	53.4821	151.745	5.0112	146.791	3.97857	75.0084	10.4479	27.6306	102.569	17.7605	211.958	133.779	8.24961	40.1701	21725.8	56265.8	9777.76	3411.39	3107.11	1389.65	2612.61	NA
NonamEVm008521t1	67.84	-3.04	1.17381	8.22e-05	0.0026	69.3464	47.1453	177.116	295.762	16.9374	173.072	388.475	56.3948	34.9036	95.6093	30.2935	21.2107	16.4019	34.8495	13.6407	0	0	0	8.292	10.8795	0	2.0782	NA
NonamEVm008564t1	80.61	2.86	1.24434	0.000263	0.00602	11.7575	11.3821	6.71694	10.5585	0.629006	12.3044	3.47744	2.85377	0	4.10219	0.818363	0.84492	2.58968	6.00425	0.476399	421.178	553.832	84.0108	2.84497	53.1767	565.472	18.3314	Beta-lactamase TEM
NonamEVm008596t1	2945.43	-3.68	1.27979	7.87e-06	0.000449	7590.8	4520.16	3332.16	23313	1737.51	2306.05	3455.73	831.663	805.817	935.548	4559.77	6960.13	42.8219	325.043	2958.16	188.713	61.6045	223.567	98.8091	39.1639	76.845	436.346	NA
NonamEVm008640t1	114.23	-3.8	0.994899	1.56e-07	1.89e-05	619.399	447.189	105.018	83.2757	54.3788	29.7026	177.742	128.088	177.026	115.778	86.4151	66.0595	122.832	103.82	79.7396	0	0	33.9019	17.806	3.79367	28.4527	32.6912	NA
NonamEVm008718t1	713.03	4.2	1.15439	1.68e-07	2e-05	22.1908	81.2778	106.848	37.8144	299.265	124.916	220.93	103.446	137.858	210.938	50.5131	185.357	2551.76	64.6789	256.141	3056.66	415.354	4792.61	2602.91	76.2306	85.545	203.461	NA
NonamEVm008736t1	35.99	-3.72	1.86295	0.000101	0.0031	443.07	136.792	31.9666	64.6552	12.0144	13.9448	3.74559	0.490326	12.1426	1.93797	43.0517	3.34679	3.18722	4.06526	0	0	0	0	4.8366	0	0	12.457	NA
NonamEVm008737t1	83.24	2.23	0.782588	0.000454	0.00851	5.34637	28.3368	26.1996	79.6771	253.793	61.9084	137.942	40.7109	73.9247	73.6782	46.6681	133.537	13.1993	29.0475	114.301	297.418	58.9007	255.55	86.403	6.52787	0	8.29764	NA
NonamEVm008768t1	29191.7	13.32	1.48056	2.95e-20	5.71e-17	14.8546	1.10735	22.5445	97.7509	12.4088	28.9114	5.2714	0	2.38298	2.56223	10.8699	1.83478	28.7542	0	0	84667.3	510220	22619	22974.7	872.854	430.673	204.487	NA
NonamEVm008785t1	479.79	3.13	1.65308	0.000328	0.00688	31.3574	28.5476	8.54018	16.3849	2.03173	38.89	2.55676	4589.07	2.76224	3.74572	7.92783	3.53935	7.08438	17.6539	9.78695	3230.45	1728.61	229.573	22.6463	57.9025	508.619	7.69419	LINE-1 retrotransposable element ORF2 protein
NonamEVm008839t1	340.87	4.41	1.93197	2.04e-05	0.000927	23.2052	8.93114	17.3065	15.5993	0.846787	6.47353	1.89246	0	0.550154	6.48222	4.40879	1.38301	346.1	0.535292	0	1040.36	5112.95	506.329	222.97	63.486	74.4059	44.9447	NA
NonamEVm008855t1	840.53	4.9	2.27172	2.08e-05	0.000945	9.69208	0	47.6442	7.29731	35.7704	13.493	95.9541	61.0292	70.7537	53.5644	0.728661	112.997	0	32.8311	104.774	0	0	9059.21	4619.46	1981.45	964.882	1220.1	NA
NonamEVm008894t1	60.91	3.03	1.32363	0.000179	0.00464	0	0	21.7578	2.48463	3.3875	7.94317	13.3041	7.85288	20.2402	3.87866	12.3628	148.74	31.0348	22.6713	30.2842	781.211	0	80.5763	84.3664	29.4033	13.5558	24.9961	NA
NonamEVm008920t1	49.08	-2.18	0.738664	0.000395	0.00787	93.174	37.839	75.8112	57.516	95.9076	69.0862	185.071	34.2014	49.6846	67.5887	41.1396	53.3729	50.4057	87.5167	43.5624	0	0	23.2407	11.6201	0	0	2.97488	NA
NonamEVm008981t1	152.51	5.35	2.24755	8.37e-06	0.00047	1.77671	0	2.89747	1.24387	871.665	0	247.97	76.0659	98.0453	117.665	2.00373	222.661	231.95	42.7059	225.136	798.203	248.115	30.8301	136.353	0	0	0	NA
NonamEVm009023t1	1536.15	-10.19	1.56921	4.75e-13	1.94e-10	8303.46	5271.25	477.275	2178.75	391.843	8562.8	301.987	1224.9	325.591	323.663	2019.91	1980.72	21.6991	272.379	1970.67	0	0	0	6.20512	23.7632	97.3933	41.0482	NA
NonamEVm009036t1	36.92	-4.85	1.45997	3.74e-07	3.74e-05	14.3768	70.5087	62.9722	50.1405	69.032	26.8356	42.9243	78.3055	55.7654	57.6888	30.6434	36.2043	10.3114	26.0326	44.7433	0	0	0	0	24.666	96.8335	14.3464	Glutathione S-transferase D7
NonamEVm009048t1	254.96	6.48	2.10402	6.77e-07	6e-05	7.12767	2.36338	5.81775	4.98341	0	0	0.833848	0	0	0	0	4.48858	0.915873	0	0	3823.26	1492.59	236.111	26.3602	0	0	4.18074	NA
NonamEVm009083t1	99.7	3.79	1.72736	5.35e-05	0.0019	10.9694	6.18796	0	5.07258	0	12.8857	0.823996	4.60875	1.06616	7.14565	4.20614	0.296935	0	0.545086	0	283.431	1196.82	90.4028	1.29641	55.386	496.402	15.9008	NA
NonamEVm009092t1	383.63	-2.69	0.817572	3.17e-05	0.00131	1209.93	1274.95	565.181	811.879	321.151	714.187	291.575	475.705	198.383	588.576	886.269	118.006	113.074	147.716	285.978	78.208	93.7842	135.859	29.164	13.1308	0	87.2218	Glutathione S-transferase 1, isoform C
NonamEVm009142t1	65.07	-3.65	0.944996	1.87e-07	2.22e-05	353.676	125.287	109.175	192.913	35.7443	62.5091	61.2615	68.9239	66.8137	58.4735	43.6444	28.8026	66.1386	55.9812	30.7739	17.8167	0	0	14.0125	5.07937	12.8968	21.683	NA
NonamEVm009231t1	84.72	3.49	2.15448	0.000316	0.00672	8.89713	0	0	8.72851	0.929411	5.91427	0	1.49033	0	0	8.45627	0.569913	0	0	0	423.764	929.715	178.484	0	36.3744	256.188	4.26155	NA
NonamEVm009252t1	106.35	-3.49	1.0725	3.18e-06	0.00022	422.266	303.329	356.558	380.823	90.3112	259.673	165.397	16.6635	47.5674	45.854	12.7555	59.869	65.4674	26.7025	46.455	0	0	0	40.0604	0	0	0	Superoxide dismutase [Cu-Zn]
NonamEVm009346t1	162.49	-3.71	2.25707	0.000233	0.00557	126.53	184.383	52.1326	39.8009	16.0469	880.971	1262.82	11.3627	23.2272	962.479	1.1739	3.91158	0	0	4.72479	0	0	0	0	0	0	5.22704	Nitric oxide synthase, brain
NonamEVm009383t1	2340	3.79	1.33042	6.89e-06	0.000411	341.001	319.602	179.596	1122.59	10.7994	233.131	1.66342	13.8147	15.7351	4.54582	46.4417	3.66745	5.06448	11.6871	12.4237	20928.4	19151.5	3015.76	2113.28	775.37	1679.69	1494.25	Heme-binding protein 1
NonamEVm009395t1	46.05	-2.44	0.833078	0.000199	0.00494	140.714	116.833	42.1873	70.9278	60.1059	69.8508	77.4757	25.9868	85.0284	83.9873	49.0419	29.2647	49.5983	33.1022	34.5328	0	0	18.6866	13.8194	11.9636	0	0	NA
NonamEVm009415t1	41.58	5.9	3.11436	2.96e-05	0.00125	0	0	0	3.73264	0	9.80415	0	1.98765	0	1.307	0	1.71311	0.931816	0	0	422.961	161.244	42.8556	0	22.0536	237.54	8.5527	NA
NonamEVm009429t1	579.48	7.9	1.21988	1.36e-13	6.4e-11	1.42185	1.88892	25.6763	7.77164	3.37628	5.8694	2.54591	1.97748	2.38074	3.10587	4.07201	27.27	2.58551	1.40527	4.01954	8934.3	2187.98	253.483	1202.66	26.5459	42.3962	5.76947	NA
NonamEVm009445t1	50.55	-3.06	0.795112	1.25e-06	0.0001	119.548	202.875	145.905	95.5232	50.3247	23.3897	87.704	55.1601	45.4499	67.7874	50.9517	21.2826	25.1092	28.3402	25.6764	0	0	17.7132	16.2927	20.0075	0	13.1214	NA
NonamEVm009530t1	9801.76	8.07	2.3036	2.06e-07	2.38e-05	117.392	10.63	63.8212	250.254	0.61804	77.1617	0	0	1.01671	1.30081	710.527	0.282562	0	0	2.14533	30562.5	90314.2	42120.4	15488.9	12821.1	11290.9	11805.5	Cuticle protein CP1499
NonamEVm009741t1	26.34	-3.04	1.45404	0.000266	0.00607	24.4238	3.47225	176.505	67.111	27.2353	9.73096	113.503	8.69208	9.94898	42.6201	9.4121	43.248	6.74435	7.43523	22.6542	0	0	0	2.56858	0	0	4.10781	Cysteine dioxygenase type 1
NonamEVm009795t1	26.76	-3.39	1.60378	0.000127	0.00367	172.304	54.1818	21.7496	18.6276	13.2369	196.521	5.40271	3.92487	11.6335	27.786	30.2968	2.51524	5.93068	1.16216	0.426369	0	0	0	2.07375	3.26572	0	17.6981	NA
NonamEVm009798t1	127.44	-5.26	1.72415	8.99e-07	7.54e-05	366.807	248.906	134.591	471.994	4.17243	47.5086	183.241	78.3549	85.1435	190.004	177.129	166.542	13.9422	84.5199	257.46	0	0	5.93137	1.98181	14.5622	257.027	13.9141	NA
NonamEVm009896t1	111.81	-2.77	0.774455	9.16e-06	0.000509	398.086	262.13	78.6071	136.097	69.7972	160.067	183.8	88.223	227.341	186.916	147.112	38.283	82.245	104	76.2616	0	0	40.721	31.4329	30.7832	78.7682	39.1347	NA
NonamEVm009924t1	298.26	3.81	2.08004	0.000134	0.00382	8.39206	4.4624	9.57468	7.05513	2.04455	24.1958	0	2293.62	2.40427	3.07929	12.0418	0	3.06469	3.36953	6.09265	1762.52	1634.88	107.732	1.60231	75.3442	592.15	8.02121	LINE-1 retrotransposable element ORF2 protein
NonamEVm009946t1	22.6	-4.76	1.4706	5.37e-07	5.11e-05	111.47	90.2711	13.8863	48.4458	12.9037	33.4941	29.5332	66.3818	20.7203	26.1136	6.68922	8.2107	8.44137	2.43068	6.59697	0	0	0	0.826232	7.87655	0	2.84251	NA
NonamEVm009993t1	27769.3	3.3	1.5671	0.000154	0.0042	0	25.9877	1636.12	2323.42	30.6488	26.5283	1551.35	2687.9	2665.74	1952.51	207.805	10373.5	10447.5	6941.93	4359.78	11260.5	6029.84	4158.58	89600.2	153825	8323.67	292496	NA
NonamEVm010041t1	50.4	-3.78	1.55245	2.73e-05	0.00117	553.754	101.242	46.3513	52.1272	17.2333	221.932	8.72165	4.41711	5.56345	21.9753	36.2796	6.99476	2.74022	1.74388	1.27934	0	0	0	10.3719	10.8909	0	5.21352	NA
NonamEVm010069t1	181.47	19.83	4.41143	1.36e-07	1.68e-05	0	0	0	0	0	0	0	0	0	0	0	0	1046.39	0	0	1496.6	1158.43	251.907	7.62124	11.0633	0	20.3644	Crustacyanin-C1 subunit
NonamEVm010093t1	1073.85	9.22	2.12982	1.71e-08	2.62e-06	0	0	2.90577	2.48829	269.216	5.96864	21.6517	259.933	582.661	51.7772	18.7669	986.41	16374.6	352.681	122.565	469.403	2146.17	801.071	1127.12	26.1653	0	3.12679	Crustacyanin-C1 subunit
NonamEVm010097t1	4483.4	2.43	0.744187	7.83e-05	0.00251	558.23	358.141	394.733	225.727	1228.7	216.808	844.05	7458.38	4590.68	1198.44	4670.4	5524.67	41075.8	2923.21	10525.7	2957.2	3482.65	6131.84	3491.94	279.146	237.381	260.978	Crustacyanin-C1 subunit
NonamEVm010144t1	12476.5	11.52	1.59639	1.32e-14	8.52e-12	16.5758	11.0154	22.1231	194.053	0.411944	21.4952	2.63789	0	1.35617	4.1933	126.11	2.77139	35.5612	0.945924	0.691375	41083	77766.7	102352	31975.5	11384.1	2054.03	7427.42	Cuticle protein CP1499
NonamEVm010160t1	2909.91	5.88	1.92191	7.53e-07	6.45e-05	12.4659	14.173	183.137	18.678	1.23488	15.9111	13.7509	0.492239	3.04404	8.42754	0	0	42.588	0	0.427735	9600.38	33467.2	5245.68	1614.51	5035.35	4855.13	3885.53	NA
NonamEVm010165t1	256.97	4.32	1.04607	1.51e-08	2.36e-06	40.0954	40.7401	22.3198	33.1181	72.9907	47.1523	36.9687	22.6221	32.7953	42.1067	32.279	45.7521	21.5971	26.1985	35.783	4089.86	325.212	599.122	72.3356	11.153	0	3.19612	Probable glucosamine 6-phosphate N-acetyltransferase
NonamEVm010244t1	14314	14	4.72127	3.44e-06	0.000231	0	0	1.91044	2.40841	0	0	0	0	0	0	0	0	5715.18	0	0	42820.3	264661	910.867	372.438	165.399	212.385	46.5493	NA
NonamEVm010258t1	147.53	19.55	1.91467	2.89e-25	1.12e-21	0	0	0	0	7.04284	0	0	25.0238	9.07398	3.22811	1.98921	93.9349	4.58937	72.0636	33.213	0	0	24.3694	330.969	1114.78	934.684	590.639	NA
NonamEVm010277t1	23.6	-2.73	1.08546	0.000233	0.00557	33.0292	37.4635	22.9348	53.2578	29.3189	88.3733	68.9075	10.6807	46.9205	52.1749	15.6404	7.90609	11.5834	9.59685	19.7175	0	0	0	2.07602	0	0	9.53193	NA
NonamEVm010283t1	71.36	-4.57	2.01536	1.88e-05	0.000897	1036.18	68.4186	5.81614	131.844	2.15679	1.9946	146.556	58.3292	14.1662	31.6462	8.76865	24.5211	6.82387	5.22502	17.4737	0	0	0	6.90746	0	0	3.11046	NA
NonamEVm010397t1	55.45	3.66	2.29233	0.000272	0.00615	0	0	0	0	0.92403	0	45.2553	255.046	26.8516	7.12915	0.399581	51.5029	55.5767	74.6445	109.455	0	70.7085	49.2813	50.6271	189.082	2.25699	231.078	Actin-2
NonamEVm010400t1	5385.53	-3.03	1.10306	5.59e-05	0.00196	28761.1	11381.2	6731.88	3163.65	1071.35	52806.9	486.917	332.204	863.502	759.654	4882.4	294.094	133.517	141.738	145.522	608.564	594.696	788.806	798.297	422.852	797.371	2515.53	C-type mannose receptor 2
NonamEVm010507t1	154.94	8.75	1.91742	5.17e-09	8.91e-07	1.63006	0	1.3266	3.43231	6.83101	0	0.509428	2.29158	8.42597	3.01198	1.98828	6.0687	271.178	2.00006	5.16384	792.459	677.208	525.664	1032.19	52.4927	0	14.8516	Cuticle protein AM1199
NonamEVm010512t1	403.53	3.49	2.12204	0.000301	0.00651	0	1.1796	47.6737	14.9185	28.1164	1.96242	0	8.92611	1.01788	0	0	7.97143	431.568	0	12.4748	3192.64	4420.56	202.187	414.051	58.3191	0	34.084	Cuticle protein AM1199
NonamEVm010519t1	2481.69	3.23	0.997653	6.82e-06	0.00041	115.966	135.119	87.212	108.137	1009.37	115.618	379.025	2673.19	2210.58	748.913	1225.54	2348.26	29895.7	1825.36	2095.78	1723.3	1218.91	3656.05	2865.76	14.9425	114.772	29.7664	Crustacyanin-A2 subunit
NonamEVm010529t1	4107.65	2.85	0.905826	3.06e-05	0.00128	240.967	155.556	470.604	23.851	462.728	92.8898	257.81	3151.94	3641.78	333.498	3455.79	5175.11	42520.8	2656.69	9576.91	4120.58	1819	7115.19	4589.2	143.96	154.911	208.527	Crustacyanin-A2 subunit
NonamEVm010538t1	20.35	-2.86	1.10992	0.00014	0.00392	63.7738	71.9953	37.9107	5.69919	25.6107	47.6914	30.2496	12.1791	13.3861	10.0043	11.5754	6.35508	51.1824	23.4387	11.1676	0	0	0	4.82215	6.75818	0	13.9814	NA
NonamEVm010620t1	950.35	10.39	2.91451	3.81e-07	3.79e-05	0	0	1.11095	4.7627	1.6539	0	266.289	2541.04	227.699	144.786	0	442.642	2446.66	2047.41	1573.49	0	241.613	5453.5	1191.03	1139.41	0	3184.54	Myosin heavy chain, muscle
NonamEVm010634t1	4008.71	6.59	1.52547	7.07e-09	1.18e-06	138.115	8.23347	182.579	102.531	0	116.004	22.3826	4.55553	1.48426	23.0638	1.23331	4.10658	2.82724	0	11.7474	34503.7	8969.08	28735.3	10105.7	1207.98	697.628	3353.46	NA
NonamEVm010701t1	26.28	-2.57	0.992259	0.000308	0.00661	88.7881	84.2088	24.9552	54.8477	9.02633	58.7311	37.5573	36.5694	25.8053	12.3531	21.322	17.7411	28.1924	19.2244	15.2619	0	0	0	9.12388	15.4169	0	18.9964	NA
NonamEVm010811t1	43.38	-3.54	2.38114	0.000383	0.0077	351.822	106.751	1.53388	305.752	20.4254	25.0841	8.41692	5.75785	12.3788	41.3967	0.328699	64.7133	0	0	0.908782	0	0	0	0	8.98851	0	0	NA
NonamEVm010861t1	72.14	12.49	8.21293	4.19e-05	0.00159	0	0	0	0	0	0	0	0	0	0	0	0	995.314	0	0	0	325.496	222.808	43.5125	0	0	0	Phosphatidylethanolamine-binding protein 1
NonamEVm010865t1	372.81	5.03	1.65826	1.03e-06	8.35e-05	37.7504	14.3029	11.5274	11.7126	0.672315	7.05183	0	0	0.902417	0.869171	1.18587	0.666918	9.50402	0	1.01494	3462.83	2841.65	1419.09	303.675	66.0012	0	11.3794	NA
NonamEVm010891t1	13016.9	-4.76	1.58222	1.3e-06	0.000103	31661.4	57665.3	7768.27	22499.8	746.805	72406.2	24353.7	7710.88	971.735	17354.5	34872.4	706.071	223.016	934.896	2713.26	462.491	0	193.526	998.404	202.705	336.442	1590.78	NA
NonamEVm010899t1	87.76	-6.13	1.39025	4.38e-09	7.63e-07	206.364	360.232	162.531	399.625	60.0201	63.0669	261.695	120.845	64.5891	106.981	31.2212	45.6526	7.84187	16.8048	16.0389	0	0	0	2.74443	0	0	4.50272	NA
NonamEVm011010t1	663.83	4.18	1.89546	3.21e-05	0.00132	0	13.8216	31.2408	4.85796	2879.11	13.6402	410.012	141.715	1263.59	1087.62	57.5816	53.264	1193.8	751.806	778.752	1725.54	3123.02	608.174	256.871	202.68	0	7.08	NA
NonamEVm011053t1	43.58	18.79	2.24993	1.17e-17	1.39e-14	0	0	0	3.73471	0	0	227.093	21.6041	26.3435	115.789	0	19.2729	225.718	8.72329	44.3923	15.6544	228.34	12.4484	9.68646	0	0	0	NA
NonamEVm011054t1	327.01	3.56	0.870723	9.13e-08	1.19e-05	21.8834	31.9023	50.177	76.327	219.037	167.973	648.711	113.694	132.485	486.649	838.911	354.271	561.164	130.369	237.617	756.377	868.606	261.714	1034.34	38.7066	101.959	61.3836	NA
NonamEVm011132t1	216.23	3.46	1.88839	0.000215	0.00523	3.52919	15.3126	2.86821	2.48186	0.618336	13.5087	2.06911	1750.47	4.08756	1.31381	6.87069	0.578408	4.71627	5.33328	3.89918	1766.97	658.836	90.4777	0	54.4683	361.104	7.63934	LINE-1 retrotransposable element ORF2 protein
NonamEVm011190t1	32.67	-2.46	0.86899	0.000247	0.00575	113.111	65.9642	47.5633	133.725	26.4264	33.427	60.573	24.0533	24.2422	42.731	21.5437	21.1084	19.2372	27.3258	26.0325	0	0	12.2757	9.70712	0	0	9.65885	Cystatin 10
NonamEVm011203t1	44.97	-2.31	0.771223	0.000243	0.00572	104.741	83.9081	61.0023	57.7037	49.5559	47.7125	112.584	71.3352	57.1321	53.9566	29.5948	40.075	35.0116	57.4721	34.7275	0	0	0	22.3065	19.8022	33.4934	17.2879	NA
NonamEVm011387t1	106.24	6.45	2.28632	1.59e-06	0.000123	2.66886	0	1.49255	0.638979	0	0	9.89484	2.23236	7.08393	9.10551	0	9.67256	117.634	14.2574	8.64343	279.898	87.8704	952.445	250.918	223.905	0	359.025	NA
NonamEVm011433t1	274.95	21.57	3.45407	3.53e-11	9.96e-09	0	0	0	94.9745	0	11.7224	7.92556	0.502122	1.02699	19.7848	0	18.8202	0	0.594546	0	4249.94	1304.96	0	0	0	338.579	0	NA
NonamEVm011477t1	27.12	-2.84	1.11771	0.000158	0.00428	104.2	43.9502	17.7787	40.4045	22.8586	18.3479	57.4582	85.7638	19.7778	17.9972	10.6618	32.5293	41.121	30.2463	25.871	0	0	0	4.61422	11.7055	0	11.3464	NA
NonamEVm011489t1	3049.43	1.98	0.620408	0.000296	0.00647	828.234	731.911	2889.83	1181.21	1777.38	1574.87	1264.4	1943.8	936.109	1201.81	2313.74	722.922	1824.09	925.793	668.828	6323.36	17967	6228.29	2092.86	2986.63	5607.07	5097.29	NA
NonamEVm011536t1	76.31	-3.23	1.72528	0.000285	0.00631	12.3068	42.1253	194.673	16.031	149.945	17.4687	28.0185	154.785	116.745	147.784	14.7684	95.5121	1.84972	5.25439	671.475	0	0	0	1.38805	7.65759	0	1.06188	Cuticle protein AMP4
NonamEVm011644t1	777.14	-4.24	1.9032	2.84e-05	0.00121	88.26	159.128	51.4005	5590.82	25.9561	4383.75	948.847	814.974	150.178	800.08	2575.55	523.324	2.80736	142.415	466.222	0	0	0	0.705614	12.224	156.96	203.399	NA
NonamEVm011652t1	23.18	-14.37	7.53884	1.93e-05	0.00091	128.715	47.917	137.161	24.9982	0	25.9623	0	0	0	0	145.222	0	0	0	0	0	0	0	0	0	0	0	NA
NonamEVm011656t1	744.35	-6.83	1.98113	1.97e-07	2.31e-05	4896.53	4011.05	1458.23	2418.04	17.552	535.204	55.8334	21.3413	19.6093	44.9214	2732.16	9.87592	9.55554	17.4644	14.4789	0	0	28.4579	17.1092	21.0755	0	47.2347	NA
NonamEVm011727t1	3631.47	8.72	1.36174	2.72e-13	1.2e-10	8.1942	6.80328	9.36592	146.165	8.56084	0	426.712	207.86	370.383	346.487	37.4469	611.521	686.782	837.206	652.808	1584.52	170.382	3496.01	14018.9	27248.2	6288.07	22729.8	NA
NonamEVm011731t1	213.76	3.26	0.915133	1.97e-06	0.000146	46.317	49.5836	50.9144	94.6024	23.4387	29.9173	130.827	22.5792	32.4157	81.4826	21.1502	14.7969	1.82315	12.7902	18.7763	1220.89	2045.36	298.803	180.53	57.7108	49.8038	218.216	NA
NonamEVm011785t1	52.37	-2.89	1.19375	0.000188	0.00475	98.0409	64.5701	56.5894	23.0695	46.7914	39.831	155.038	118.013	82.5268	118.568	23.4068	60.9639	108.731	67.2264	47.1418	0	0	0	5.80238	1.40016	0	34.5083	NA
NonamEVm011801t1	1281.69	-3.17	1.13062	3.26e-05	0.00133	6436.51	6500.86	3230.41	3520.68	34.8912	826.329	827.873	116.064	79.5289	625.389	4320.46	35.71	13.7694	19.283	24.3735	251.144	231.856	143.098	249.663	95.2428	95.3231	518.631	Glutathione peroxidase
NonamEVm011804t1	2218.37	-10.79	2.07035	1.06e-09	2.04e-07	3183.06	2935.66	646.519	9155.64	30.0026	30930.6	148.814	80.0189	32.983	49.2501	821.215	465.951	4.07134	43.2316	156.96	0	0	0	0	10.302	0	109.803	NA
NonamEVm011882t1	56.52	-3.14	1.38261	0.00014	0.00392	197.691	97.4585	31.9579	218.03	6.77513	16.0819	232.466	59.8878	17.6924	145.169	15.0585	11.4439	10.0909	31.5305	39.2539	0	0	0	6.21623	19.6982	75.43	11.5784	NA
NonamEVm011895t1	392.37	6.57	4.21534	6.69e-05	0.00224	0	0	0	0	0	0	15.7937	580.132	22.084	1.05568	0	341.882	764.244	624.573	650.367	0	1676.11	283.801	433.264	1921.24	0	1317.6	Actin
NonamEVm011916t1	216.58	16.55	2.73459	1.83e-10	4.52e-08	0	0	0	0	1129.35	0	225.98	460.777	819.029	295.728	0	359.852	90.5488	459.169	554.429	0	0	5.90022	63.023	254.77	0	46.3022	Actin-11
NonamEVm011953t1	92.08	-2.2	0.766872	0.000474	0.00874	176.484	338.283	143.717	161.555	62.1757	292.918	98.8986	42.7809	90.8127	161.335	154.779	34.9944	50.5103	58.8141	28.374	0	59.8565	34.7181	7.07644	18.8979	0	8.70115	NA
NonamEVm011954t1	386.26	-2.53	0.985704	0.000376	0.00761	2145.48	1287.16	456.567	631.943	212.643	1998.15	209.448	23.5373	97.1668	178.963	308.598	64.9661	63.7287	51.1099	107.011	218.989	0	37.3441	111.944	30.457	226.239	36.3161	EF-hand domain-containing protein D2 homolog
NonamEVm012018t1	5910.77	3.5	1.7467	0.000138	0.00389	462.118	4.54226	617.915	292.53	2.87008	6.23867	0.702647	1.90736	0	1.25467	6.5708	15.3175	243.72	0.564777	3.30987	16448	70169.6	5873.13	6566.53	6395.98	6947.32	15976.7	NA
NonamEVm012101t1	211.03	-2.29	0.729346	0.000169	0.00446	1137.54	718.775	321.173	489.04	170.25	533.409	147.011	32.4309	103.369	169.578	191.276	47.2864	78.1053	44.2316	53.8117	219.092	31.9802	55.9105	76.1595	6.54133	0	15.631	NA
NonamEVm012189t1	387.72	5.36	2.22067	7.43e-06	0.000433	10.3393	0	1.86774	17.9419	1345.24	32.6229	461.397	1552.11	727.656	477.156	0	365.933	95.5913	34.2503	624.839	30.1255	78.011	950.395	1690.96	27.8224	0	5.66774	NA
NonamEVm012226t1	2348.23	13.72	3.63679	6.09e-07	5.59e-05	0	0	0	8.69422	0	0	0	0	0	0	0	0	0.928559	0	0	16123.9	23919.7	2709.04	8401.65	399.067	0	98.1844	NA
NonamEVm012228t1	787.84	4.32	0.96334	2.58e-09	4.59e-07	32.6795	124.768	49.4022	53.9324	217.59	108.901	114.209	280.136	437.99	115.9	288.256	208.74	601.557	1002.59	399.962	882.102	900.952	6137.6	1459.25	629.445	2917.91	368.615	NA
NonamEVm012274t1	25.53	10.87	8.26441	7.16e-05	0.00236	0	0	0	0	0	0	0	0	0	0	0	0	17.2697	0	0	0	0	479.111	60.0426	3.25888	0	2.07137	NA
NonamEVm012291t1	25.24	3.95	1.72741	3.36e-05	0.00137	0	3.51773	0	12.3539	6.7701	5.7724	22.6654	22.3993	9.65911	18.2937	9.64875	6.61081	6.56183	11.7859	9.91088	342.406	51.7631	0	2.10137	3.31586	0	9.75169	NA
NonamEVm012335t1	310.77	20.06	3.01726	3.51e-12	1.24e-09	0	0	0	31.2607	0.220709	104.262	76.7104	1861.96	1641.93	141.122	0.286759	0	0	767.263	0.760435	501.528	0	0	757.155	0	333.088	619.44	Cuticle protein AMP1B
NonamEVm012367t1	146.39	3.78	1.48128	1.89e-05	0.000897	21.0142	16.3601	5.69372	11.0805	21.4686	15.3366	57.494	39.1963	28.3745	17.5827	8.81563	24.6402	29.4353	44.6408	22.7632	15.5109	0	2588.19	205.964	28.6445	0	18.3648	NA
NonamEVm012412t1	1088.08	6.75	2.91161	7.27e-06	0.000429	0	10.4846	7.29888	89.953	9.97018	19.8472	0	0	2.47423	0	0	2.10235	8607.07	0.527293	0.386226	6737.3	6983.57	841.522	122.506	111.884	336.708	54.0873	Pro-resilin
NonamEVm012517t1	43.51	-3.14	1.41122	0.000158	0.00428	21.2928	40.0364	20.2664	22.3447	54.5057	25.71	113.386	173.576	116.455	133.362	13.1746	87.0189	7.33049	20.3836	108.487	0	0	0	0	0	0	0	NA
NonamEVm012523t1	57.2	-2.75	1.16139	0.0003	0.00651	93.2909	45.9727	355.377	132.012	8.89096	29.0681	103.23	48.6401	20.7445	116.808	65.4749	112.056	10.2649	12.9356	78.1191	0	0	5.43466	17.2698	2.71963	0	0	NA
NonamEVm012682t1	1357.28	-7.36	1.58016	2.09e-09	3.78e-07	4420.35	4017.91	393.165	1752.76	157.312	6902.89	895.624	1443.01	177.849	606.556	4994.1	1517.07	29.8159	168.713	2105.22	0	0	29.9603	8.3788	30.4658	134.196	74.9124	NA
NonamEVm012733t1	1038.25	6.8	3.94679	4.09e-05	0.00158	0	0	3.30163	4.29241	0	0	277.403	3592.02	332.783	35.6057	0	901.182	2249.54	907.632	1380.17	0	5968.69	247.663	1235.55	2435.08	2.10137	3268.56	Actin-3, muscle-specific
NonamEVm012831t1	296.12	21.49	3.41534	2.69e-11	7.73e-09	0	0	0	2.49562	0	0	0	0	0	0	0	0	91.174	0	0	2986.41	2940.76	79.0946	406.962	4.45873	0	3.27206	NA
NonamEVm012875t1	1808.06	3.26	1.00484	6.12e-06	0.00038	81.9743	191.274	622.927	196.702	1383.1	121.799	1025.59	400.782	1103.37	850.621	112.891	352.462	4347.19	324.791	1327.38	8218.18	2180.7	9833.92	5437.1	571.268	443.776	649.478	NA
NonamEVm012937t1	26.15	-4.35	1.44361	1.75e-06	0.000133	180.432	162.287	66.9761	23.3738	3.06189	48.1372	6.98213	4.9387	10.1056	12.3268	24.7605	1.70789	3.71425	4.09369	2.99495	0	0	0	4.17082	12.0598	0	3.2095	NA
NonamEVm013128t1	226.45	18.09	5.71186	2.14e-06	0.000158	0	0	0	5.03824	0	0	0	0	0	0	0	0	2581.26	0	0	809.532	1491.59	61.1479	26.4777	6.77707	0	0	NA
NonamEVm013130t1	1053.33	4.07	1.49007	6.88e-06	0.000411	3.02632	30.5764	133.175	46.0068	61.1545	1.67404	14.5069	577.652	141.36	26.5689	2.49383	452.923	4182.57	239.618	914.392	6183.42	3108.24	900.222	1851.99	431.841	1046.24	2823.56	Cuticle protein AMP1B
NonamEVm013162t1	64.82	-3.26	2.12418	0.000513	0.00923	7.0982	246.089	55.0192	532.523	81.5892	33.6405	0	13.2691	21.7651	25.2361	0.399069	53.0025	0	30.8497	48.6689	0	0	0	0	0	40.6332	236.324	NA
NonamEVm013166t1	2189.84	5.12	1.29504	2.5e-08	3.73e-06	36.8205	96.8244	147.603	59.4811	76.2264	20.213	40.0852	1205.49	348.635	40.7043	6.85545	946.569	8177.51	907.733	2833.59	13516	6017.25	2347.8	4126.48	739.499	2390.83	4094.28	Cuticle protein AM1159
NonamEVm013169t1	2324.38	3.06	1.52693	0.000301	0.00651	17.7877	5.89573	177.174	425.185	5.85392	3.97929	523.448	892.588	886.219	727.2	105.291	1412.49	1290.4	1833.09	1372.99	641.01	0	372.605	11143.1	11309.1	732.559	17258.4	Troponin C, isoallergen Bla g 6.0301
NonamEVm013229t1	323.99	9.66	2.54596	1.4e-07	1.73e-05	0	0	0	0	1.236	3.88376	0.414399	104.699	7.13967	2.61949	18.5427	41.6755	4693.99	86.1918	82.0583	594.148	1383.95	24.2632	44.2084	38.7377	0	0	Endocuticle structural glycoprotein SgAbd-8
NonamEVm013238t1	937.64	3.97	3.18842	0.000408	0.00802	5.54327	3.61958	0	34.0893	1.84603	1.95794	0	0	0	0	2.05755	0.597398	12641.9	0	0	1470.4	5412.69	842.191	89.449	54.7139	25.482	41.4509	NA
NonamEVm013244t1	1274.46	-1.67	0.492997	0.000268	0.0061	3189.53	2042.14	1124.97	1737.06	1127.68	1363.62	2723.94	1774.77	1517.9	1567.32	798.546	1127.83	1826.29	1321.82	1055.51	522.553	271.475	808.901	646.113	547.972	355.815	586.377	NA
NonamEVm013272t1	6431.86	-2.52	0.873629	0.000177	0.0046	20762.5	22694.2	3753.7	8673.24	1949.25	50145.6	1549.93	1364.1	3020.66	2970.07	10443.1	1021.94	1992.35	1608.09	1640	1674.65	562.629	1778.01	1235.49	516.564	1498.36	646.519	NA
NonamEVm013360t1	85.93	-4.4	2.18552	4.54e-05	0.00167	920.575	455.9	55.3479	332.511	6.1223	19.9175	1.85998	0	2.83509	43.4522	23.5291	1.00216	2.05338	6.60166	2.39184	0	0	0	7.94221	8.46121	0	0	NA
NonamEVm013387t1	48.93	-3.45	2.23841	0.000386	0.00774	635.182	41.6944	0	148.275	2.17798	0	69.9727	79.5323	8.685	35.813	6.43937	0	0	8.20662	3.44267	0	0	0	2.00226	23.0537	0	12.0175	NA
NonamEVm013451t1	440.52	11.2	1.66975	3.1e-13	1.34e-10	0	1.7996	0	0	0.843708	1.50048	3.48807	1.8882	0.387903	4.96865	2.20219	1.94879	4.48519	4.92016	0.655389	5677.12	3715.58	144.525	123.697	0	0	1.4782	NA
NonamEVm013488t1	10200.6	10.12	1.93373	5.8e-10	1.21e-07	0	9.50312	1.46236	968.376	0	0	1622.23	3363.75	1301.28	1719.39	291.419	3296.77	3218.81	3945.73	4123.84	3543.98	93.4248	389.47	23013.8	39787.2	4746.23	128977	Troponin C
NonamEVm013495t1	154.04	20.28	2.13907	3.49e-22	9.03e-19	0	0	0	0	1.84678	0	6.65302	4.40926	9.0992	18.718	0	426.652	186.075	77.1755	70.7018	0	0	49.6958	656.538	1015.09	0	866.115	Troponin C, isoform 2
NonamEVm013497t1	24.55	-2.71	1.29068	0.000573	0.00996	10.6863	0	49.4608	65.9387	24.3439	57.8929	25.405	30.8733	42.4985	49.7223	30.6878	10.0253	46.3755	37.7279	55.3971	0	0	0	0	0	0	3.10792	NA
NonamEVm013501t1	153.15	-2.25	0.706012	0.00016	0.00431	440.805	145.229	147.777	205.609	168.698	211.102	399.243	271.711	190.442	213.343	113.03	129.395	126.505	218.925	134.987	0	0	56.4504	55.9295	61.1344	34.2791	44.7464	NA
NonamEVm013563t1	619.24	12.07	2.15062	3.73e-10	8.04e-08	0	0	0	14.9479	1096.21	0	17.9165	84.351	41.4899	42.6201	0	136.665	47.1352	249.11	1883.7	2667.57	1362.83	1020.39	2336.06	242.632	2339.18	40.5376	Cuticle protein AM1239
NonamEVm013574t1	1215.79	7.57	1.98618	6.3e-08	8.8e-06	1.77142	8.24886	2.88544	24.8386	37.3528	1.95884	0.415091	47.0901	13.223	2.60782	206.807	89.964	18258.7	85.7122	33.5352	2345.28	4538.33	574.888	144.471	219.983	70.0013	39.4257	Larval cuticle protein LCP-17
NonamEVm013603t1	4829.55	3.73	1.89794	0.000107	0.00322	35.6397	19.1359	7.18141	16.092	13194.7	8.08332	392.187	8780.19	5454.79	939.879	7.66947	30219.9	161.26	8107.03	30251.4	1290.01	4991.82	315.385	707.716	43.7326	1273.37	32.997	Cuticle protein AMP1A
NonamEVm013684t1	1339.26	6.1	2.89332	1.5e-05	0.000763	0	13.4827	10.8334	99.3993	8.55086	0	0	7.33167	0	0	57.5203	12.0215	12988.1	11.4866	17.9669	7251.19	7792.12	567.829	231.65	105.719	239.189	49.4109	Cuticle protein AM1199
NonamEVm013704t1	1057.4	4.49	1.92008	1.59e-05	0.000784	69.8022	13.7675	63.1158	207.159	1.30892	17.4077	0.331329	1.56643	0	0	0	0	0	4.32899	1.36088	2290.4	1039.23	10058.2	7205.13	464.662	36.0104	1788.87	NA
NonamEVm013706t1	45.93	6.17	3.0699	1.97e-05	0.000917	0	0	0	1.24175	123.749	0	12.8822	12.7581	57.1596	43.9469	0	6.15075	100.859	5.23068	7.67565	327.966	0	185.805	125.137	0	0	0	Pro-resilin
NonamEVm013815t1	13793.2	14.09	2.72148	8.03e-09	1.33e-06	2.82466	0	3.51783	9.01192	0	0	0	0	0	0	187.603	0	0.389172	0	0	36375.7	140841	56687	67064.6	1905.68	232.529	139.351	NA
NonamEVm013826t1	2893.31	2.05	0.643068	0.000269	0.0061	142.455	624.43	568.444	678.281	2158.67	314.716	894.726	2455.03	2389.86	1360.13	779.716	3890.48	4419.99	3599.52	3207.37	2582.41	1285.76	1647.51	5080.29	11020.9	4099	10453.1	Profilin
NonamEVm013840t1	27.08	-3.24	2.12727	0.000538	0.0095	91.0061	214.856	5.68456	52.9808	0.614385	205.261	2.05233	0	0	0	0.804571	8.95098	0	0	0.431485	0	0	0	0	5.54247	0	7.65572	NA
NonamEVm013920t1	438.11	-2.75	1.06982	0.00019	0.00478	3592.22	2310.59	358.29	541.128	115.85	290.126	42.1201	70.0411	121.614	224.91	868.522	37.95	17.7783	24.7226	50.324	177.296	137.701	69.2245	65.3226	18.5257	2.845	501.28	NA
NonamEVm013930t1	46.84	7.81	2.6181	1.03e-06	8.35e-05	0	0	0	10.7936	0.26785	0	0.361078	1.28433	1.75349	0	0	8.21784	124.025	2.70182	10.5485	583.919	144.597	56.5922	36.3551	44.1655	0	4.86756	NA
NonamEVm014028t1	650.5	5.59	2.36587	7.95e-06	0.00045	0	8.23684	0	3.72009	385.465	1.95074	4.55729	474.064	351.75	46.2919	52.9953	82.133	9663.04	115.11	81.6883	858.809	584.097	341.109	989.294	166.174	0	100.465	Cuticle protein AMP2
NonamEVm014060t1	54.74	-2.78	1.17578	0.000277	0.00619	375.375	283	61.0083	232.492	6.16154	23.889	22.8869	10.3009	10.1206	42.0029	28.7084	9.21086	10.9359	28.468	5.96963	0	0	31.0673	9.67669	11.9703	0	1.03911	SCAN domain-containing protein 3
NonamEVm014069t1	2113.31	6.44	1.25827	1.97e-10	4.76e-08	24.9721	64.8264	61.7279	160.757	345.043	549.625	17.3264	197.804	261.279	13.0851	2.41907	1084.36	2077.86	455.821	1176.61	19568.4	3515	2373.86	3474.68	999.821	5486.56	4580.9	Cuticle protein AMP1B
NonamEVm014077t1	37.21	18.61	3.24445	1.03e-09	2.01e-07	0	0	0	0	0	0	0	2.5015	0	0	0	3.77776	1.89665	0	0.431594	0	364.921	0	70.9641	150.02	0	224.048	Actin, muscle 2/4/4A
NonamEVm014115t1	594.34	7.89	1.53069	2.49e-10	5.67e-08	8.80419	8.27147	0	58.3917	150.588	230.731	10.8364	21.9753	44.8598	0	2.45621	432.9	644.849	22.3908	377.258	6049.63	2197.31	160.816	568.747	200.691	583.479	1300.57	Cuticle protein AMP1B
NonamEVm014160t1	2515.68	4.84	1.61721	1.3e-06	0.000103	23.0094	58.8636	273.917	741.966	174.23	0	87.0929	249.479	444.989	139.984	16.0423	210.03	4356.59	174.706	291.546	21227	12924.9	2384.27	3274.31	1160.99	3133.51	3997.46	Cuticle protein AM1199
NonamEVm014191t1	64.32	-2.92	1.05442	7e-05	0.00232	133.605	128.632	152.778	78.3939	68.4203	87.8601	139.545	29.8967	66.287	98.1653	53.8105	57.6492	178.24	63.2741	48.159	0	0	0	17.2675	13.0451	0	0	NA
NonamEVm014241t1	595.84	10.04	3.60717	2.87e-06	0.000203	0	0.835027	1.02672	4.40152	0	0	0	0	0	0	0	0	0	0	0	2341.84	137.797	9906.79	602.879	83.4545	0	29.3639	NA
NonamEVm014315t1	49.04	-2.63	0.834192	5.75e-05	0.00199	166.235	101.028	56.5445	116.338	47.1011	46.4645	72.9173	28.678	59.1458	106.246	71.8586	17.4185	42.6142	44.1566	46.2249	0	0	14.1212	14.8162	14.8465	0	12.1635	NA
NonamEVm014326t1	20.51	-3.09	1.12131	4.49e-05	0.00166	58.7111	70.8648	10.4367	43.7137	16.9218	60.2876	35.2047	34.7931	7.91045	19.5789	18.117	18.8956	19.5228	20.0908	8.48335	0	0	0	2.97065	3.51901	0	1.15947	NA
NonamEVm014334t1	369.14	9.69	2.73267	3.09e-07	3.24e-05	0	0	0	11.097	0	0	14.7831	565.599	27.9942	0.655563	0	195.682	628.605	665.841	535.575	0	1653.63	297.921	371.357	1670.74	74.0334	1407.46	Actin
NonamEVm014429t1	54.54	-2.43	0.830403	0.000205	0.00505	201.445	133.191	47.6669	152.5	51.3259	72.7896	103.908	37.167	57.0484	121.721	30.9911	15.2322	28.6654	54.5037	30.3301	0	0	26.4231	18.3057	8.11197	0	8.64796	NA
NonamEVm014563t1	24.58	-3.17	1.41785	0.000148	0.00405	389.372	38.1521	2.18275	1.87421	3.75019	15.286	8.80402	13.6567	7.31772	3.57718	26.3074	5.81644	2.08497	1.32239	3.57674	0	0	4.64455	6.16217	6.95517	0	0	NA
NonamEVm014674t1	49.38	-3.61	1.40777	2.42e-05	0.00107	384.446	238.526	77.3923	79.9784	12.71	44.4193	11.4945	12.0709	13.1906	22.5036	89.6929	4.76614	9.24672	15.0178	7.8189	0	0	0	13.9359	44.0483	0	5.1308	NA
NonamEVm014680t1	66.56	-3.17	1.46349	0.000169	0.00447	15.883	66.8749	7.18986	64.3024	131.489	54.7579	27.2868	59.5985	69.3027	78.4108	54.7015	2.5424	501.514	65.9229	82.9121	0	0	0	0	63.3868	87.6858	30.6251	NA
NonamEVm014699t1	67.03	-3.44	1.71299	0.000149	0.00407	831.356	285.665	21.8186	122.143	3.4133	17.5463	10.4363	13.1847	6.27919	17.1994	38.1882	8.06714	0.40541	9.28235	5.2956	0	0	0	16.9608	0	66.5926	0.925984	NA
NonamEVm014721t1	27.45	-5.93	1.96405	8.62e-07	7.31e-05	380.707	31.3893	9.8737	31.8391	5.19171	3.77411	7.74466	23.871	17.7043	5.21482	3.20402	4.03296	2.82006	8.82842	4.29779	0	0	0	0	1.10487	57.9393	4.37493	NA
NonamEVm014821t1	39.74	-2.46	0.844024	0.000191	0.0048	205.922	112.393	31.42	67.5936	42.441	50.5317	36.9056	29.7268	28.4062	55.3261	35.8183	17.8834	22.6531	42.6761	31.1994	0	0	6.25559	24.904	15.088	0	17.1113	NA
NonamEVm014827t1	83.59	3.29	1.158	2.11e-05	0.000951	28.3401	0	11.5408	17.3853	29.0147	5.8762	11.6215	38.1625	15.2555	22.8154	2.40909	1.42325	77.1049	7.63088	24.5033	312.67	481.796	464.777	145.847	17.5963	88.0571	35.1571	Cuticle protein AM1199
NonamEVm014828t1	1042.73	4.63	1.7743	5.88e-06	0.000368	0	12.9515	28.7969	12.4078	5.86278	9.7572	700.146	3011.37	804.199	1148.38	20.8921	362.795	8021.26	1039.73	2573.37	1796.8	1473.19	987.141	904.824	14.3178	0	11.7685	NA
NonamEVm014837t1	221.94	-3.24	1.91882	0.000401	0.00796	5.29558	72.7823	455.835	329.106	18.4476	134.819	0	0	1.51922	0	0	1.69892	0	2.9215	5.99169	0	0	0	3.47322	203.611	2240.54	1406.56	NA
NonamEVm014854t1	12049.2	7.36	1.42911	2.2e-10	5.24e-08	210.039	294.195	206.965	749.772	1.95028	215.806	9.53136	0	2.13859	2.73568	2.0485	5.27861	0	0.61538	0	54175	114615	56400.3	34260	1914.01	1268.08	750.208	NA
NonamEVm014874t1	186.03	3.24	1.22989	4.37e-05	0.00164	0	3.54185	46.5676	331.131	16.0353	41.9207	254.187	157.476	84.0562	763.386	47.0717	69.7224	52.8168	37.7684	79.338	62.6107	202.903	1451.69	237.819	29.3814	58.8636	64.3389	NA
NonamEVm014988t1	21.72	3.83	2.49577	0.000256	0.00592	1.77957	0	0	3.74245	0.310043	0	0.416983	1.49301	0	2.61842	0	0.285735	0	0	0	0	388.682	67.6165	2.10216	8.83444	0	0	NA
NonamEVm014996t1	90.45	-3.09	1.59521	0.000327	0.00686	494.904	366.724	86.4417	352.705	1.90939	146.095	51.0009	23.801	5.58776	53.9709	280.942	16.3966	7.35236	1.74518	15.4394	0	0	12.1851	9.49701	0	0	63.154	NA
NonamEVm015018t1	255.48	6.04	1.78003	2.32e-07	2.56e-05	0	9.72523	9.88313	129.015	183.378	16.0612	4.95678	10.2925	49.555	3.66918	0	60.5461	413.36	51.0263	98.0582	3005.92	456.019	918.068	148.136	35.0949	0	17.8913	NA
NonamEVm015156t1	18881.7	2.26	0.683423	0.000105	0.00317	3451.72	5211.73	4594.94	3880.67	9729.12	4304.18	6104.82	12935.4	6480.89	5497.22	9217.42	6434.19	9335.97	6791.72	8647.5	6457.14	97375.3	14899.3	13038.3	106858	33333.5	40817.5	40S ribosomal protein S12
NonamEVm015160t1	90.4	3.59	2.18208	0.000268	0.0061	0	0	0	0	155.754	148.562	278.536	97.5567	71.4352	242.761	4.51424	48.8423	665.555	8.98992	121.62	0	116.533	18.8469	7.12769	0	0	2.16876	NA
NonamEVm015239t1	78.02	3.8	2.0301	0.000123	0.0036	0	0	11.5344	0	0	0	0.416718	0	0.51745	0	0	0	0	0	2.19894	1248.6	237.509	162.994	37.9337	13.5699	0	1.12062	NA
NonamEVm015302t1	69.19	-4.9	2.95802	8.48e-05	0.00267	744.978	169.295	81.9569	153.252	1.37344	5.42787	3.84819	1.32602	1.40244	0	349.568	0.19564	0	0	0	0	0	0	0	0	0	9.49181	NA
NonamEVm015462t1	34.61	3.69	1.83924	0.000103	0.00313	0	0	0	0	8.29137	0	7.03966	11.2827	19.1897	14.8534	5.57505	48.7495	142.667	25.5644	28.5458	0	0	36.9054	41.4608	180.748	108.042	82.5703	Pro-resilin
NonamEVm015478t1	35.98	-2.85	1.36142	0.000414	0.00808	57.0075	35.4061	30.5566	26.1332	26.5078	35.9414	54.9886	46.0777	57.1858	148.562	0	7.79978	33.655	38.319	32.3948	0	0	6.23197	0	23.9201	113.162	17.617	NA
NonamEVm015480t1	95.83	-2.65	0.824985	4.67e-05	0.0017	499.208	254.882	78.9841	128.702	71.8458	86.6165	153.333	140.203	78.0623	119.643	81.9041	51.5016	105.251	60.2258	55.5944	30.9544	0	17.7054	42.7912	27.7129	0	23.1074	NA
NonamEVm015632t1	116.72	19.4	2.12485	1.09e-20	2.42e-17	0	0	0	0	901.873	1.97706	5.81984	98.5416	130.325	32.4297	0	38.8485	861.918	75.8634	20.1109	78.1641	198.752	80.228	23.597	14.218	0	5.25216	Cuticle protein AM1159
NonamEVm015650t1	36.74	-3.14	1.58165	0.000269	0.0061	268.229	42.4057	28.9988	114.255	3.07864	1.98477	132.579	33.859	8.59985	90.4826	11.9612	13.1396	15.5161	9.29924	18.3371	0	0	0	4.14832	0	0	11.4564	NA
NonamEVm015791t1	2923.04	10.72	2.05937	1.04e-09	2.01e-07	0	5.88513	0	1033.25	3.70134	0	182.772	238.024	539.9	807.861	56.6136	0	495.449	1243.9	200.791	2842.65	241.145	15744.6	3913.89	911.189	30850.7	4994.43	NA
NonamEVm015843t1	63.33	-2.72	1.25893	0.000503	0.00909	33.8265	20.0541	68.3367	139.309	105.379	53.8469	234.407	71.0825	68.8123	179.564	181.767	66.3331	5.00525	21.4834	89.5087	0	0	0	2.07248	0	45.2424	7.25973	NA
NonamEVm015974t1	7776.54	16.17	2.669	1.68e-10	4.22e-08	0	0	0	0	1.29094	0	0	0	0	0	0	0	0	0	0	14681.3	154212	1042.52	1041.29	27.9722	61.9327	15.7118	NA
NonamEVm015987t1	1590.73	8.92	1.32417	3.35e-14	1.86e-11	1.9107	20.5086	6.99546	40.138	123.82	5.72439	6.20448	34.7443	34.915	15.9611	0	7.08937	98.0463	17.0019	39.9315	14990.2	3039.77	3140.9	5141.52	820.269	1497.03	5913.38	Cuticle protein AM1199
NonamEVm015990t1	5315.3	6.91	1.59117	6.99e-09	1.18e-06	13.908	98.7945	128.624	125.559	6039.1	551.323	27.0258	2798.44	1593.08	146.334	109.653	1325.44	18609.2	1176.01	2061.5	43928.3	26209.8	2122.71	3304.6	728.297	2124.11	3714.65	Cuticle protein AMP5
NonamEVm015999t1	3658.78	3.48	1.43554	4.81e-05	0.00174	0	2.35187	250.414	707.337	103.139	15.8497	873.566	903.665	1114.28	1166.8	191.474	288.052	671.847	1406.58	762.855	4749.34	549.314	7531.83	1464.92	9881.03	45796.7	2061.71	NA
NonamEVm016096t1	374.87	5.55	2.3425	7.94e-06	0.00045	1.73237	3.56943	0	16.1091	8.57492	0	2.51219	31.8842	5.102	7.68067	0.813024	13.9458	6379.85	13.0368	27.5821	657.907	713.02	290.473	29.3635	34.2262	0	9.77251	Cuticle protein AMP4
NonamEVm016121t1	46.06	-5.82	1.51883	4.36e-08	6.2e-06	424.934	150.673	52.4733	141.598	19.323	51.4351	12.0567	21.4876	25.8052	17.3552	52.1809	5.38626	9.22331	16.4283	7.05305	0	0	0	2.46861	0	0	3.54082	NA
NonamEVm016126t1	20.6	3.85	2.42012	0.000224	0.00541	0	0	0	2.48577	0.61667	0	0	20.6819	1.521	0	77.9568	26.9917	52.3142	35.577	12.4036	109.447	88.4161	18.537	0	0	0	6.29245	NA
NonamEVm016133t1	299.9	-3.37	1.62869	0.000145	0.00401	927.388	819.583	197.443	308.063	363.548	1552.59	220.431	202.156	276.868	310.747	466.313	294.633	0.909501	105.576	464.666	0	0	0	37.8569	0	0	48.9191	NA
NonamEVm016216t1	30.8	-2.61	0.921423	0.000149	0.00407	117.426	57.2739	44.1773	52.9561	11.6532	7.68863	62.467	52.5168	57.2193	36.4293	16.0142	23.7271	37.7613	42.2328	36.4677	0	0	6.00544	9.0644	4.40019	0	2.15249	NA
NonamEVm016223t1	5153.79	-5.91	1.77502	2.92e-07	3.08e-05	6948.99	3560.18	6908.08	55017.8	319.482	6523	10947.3	895.802	130.217	4097.05	5747.1	324.358	1.16154	39.836	205.898	119.568	41.1817	0	2.84734	778.002	2550.55	8225.01	NA
NonamEVm016250t1	8334.57	-4.53	1.57238	2.48e-06	0.000179	6394.52	35086	1494.84	41872.9	985.361	6248.49	18188.9	17720.5	4920.79	15558.7	15126.1	5641.37	80.5291	4222.47	8778.38	227.624	0	41.724	541.851	26.3168	91.1037	111.991	NA
NonamEVm016315t1	69.41	-2.72	0.950609	0.000102	0.0031	691.797	115.765	76.7289	78.2053	56.5638	107.012	30.147	21.2288	37.104	51.9837	63.4024	17.8054	20.0219	32.4271	16.9711	0	0	40.6148	30.3423	27.6918	0	11.2769	NA
NonamEVm016348t1	2171.88	5.72	2.03194	1.81e-06	0.000137	51.3572	32.9877	49.0381	194.937	7.7159	17.6229	0	48.5708	62.5432	9.77789	4.81802	33.0229	13780	36.9804	126.812	15037.6	13683.2	3637.55	244.241	329.931	295.741	96.967	NA
NonamEVm016378t1	1072.89	10.01	1.49675	1.15e-13	5.77e-11	0	2.36035	8.70601	7.46495	18.5168	0	0.416275	17.7376	10.6554	9.08204	20.8033	0	8.26206	0	28.6757	3333.59	5981.37	9270.81	2094.08	1425.97	253.408	1111.67	NA
NonamEVm016382t1	2071.84	-2.65	1.16034	0.000472	0.00873	20722.7	12991.2	1256.4	4043.45	77.8602	429.741	99.522	14.4362	142.794	396.409	2786.61	61.0253	16.3001	67.3239	46.5665	1085.84	232.629	427.114	449.789	15.1936	68.11	149.546	NA
NonamEVm016388t1	43.52	-6.46	1.65905	3.75e-08	5.38e-06	306.072	391.563	42.1373	79.5862	9.86007	11.9497	7.49196	2.94321	14.6765	25.2033	48.649	3.06995	3.64492	7.55299	1.70572	0	0	0	1.38245	0	0	0	NA
NonamEVm016442t1	950.13	7.9	3.85385	1.56e-05	0.000776	1.57258	2.72499	2.56081	50.1059	0.274252	3.4729	0	0	0	0	0	0	850.774	0	0	5418.09	12881.3	1154.08	435.364	44.3051	42.1143	16.0589	Cuticle protein AMP4
NonamEVm016464t1	314.85	21.11	3.7705	1.54e-09	2.8e-07	0	0	0	0	0	19.7874	0	6.47639	0	0	0	0	0	0	0	3873.2	108.804	1686.41	14.0305	18.7913	0	1199.25	NA
NonamEVm016491t1	149.93	-3.52	1.27487	1.56e-05	0.000776	1296.58	906.696	143.954	247.333	31.9633	180.176	21.6612	14.0215	57.7502	63.4779	153.283	17.9137	15.899	17.8031	6.29758	99.0734	0	0	16.0806	2.22235	0	6.37927	NA
NonamEVm016496t1	60.94	-6.18	2.26771	2.21e-06	0.000162	792.438	50.6511	11.6041	217.339	1.23123	0	84.3769	55.4091	14.159	31.0032	9.56403	6.42119	0.455749	0.580772	6.81906	0	0	0	0.690912	8.70332	42.9138	6.23818	NA
NonamEVm016539t1	3027.25	3.5	1.6792	0.000112	0.00334	210.685	8.23334	283.08	156.014	0	24.5942	0	1.518	1.53906	0	5.69302	2.64476	60.4126	1.79616	1.74679	3819.34	12863.8	18153	6416.32	7502.89	6307.79	10778.5	NA
NonamEVm016544t1	2574.95	11.23	5.66337	2.12e-05	0.000951	0	0	0	4.10772	0	0	0	0	0	0	0	0	0.923668	0	0	7750.04	48107.5	223.553	556.178	6.50694	0	0	NA
NonamEVm016577t1	180.42	6.99	2.95457	6.29e-06	0.000386	0	0	1.43415	0	0	0	23.1399	278.379	30.9864	2.6082	0.401398	169.783	472.338	260.913	248.532	0	1114.21	102.981	217.238	374.486	20.2506	651.523	Actin, alpha cardiac muscle 2
NonamEVm016628t1	167.33	-3.21	1.35604	9.54e-05	0.00294	388.22	119.159	273.449	172.917	44.3707	153.68	1499.57	287.664	140.644	204.699	17.5355	49.5742	69.1147	98.0935	75.4245	0	0	0	20.7185	22.827	0	43.5171	NA
NonamEVm016725t1	1216.85	-2.8	1.24954	0.00035	0.00719	5920.09	6237.08	610.804	3741.85	200.41	3726.09	677.677	257.052	554.23	1194.57	1585.52	315.596	81.9594	250.897	532.819	156.119	0	407.445	86.5474	13.0901	0	220.741	NA
NonamEVm016726t1	123.24	2.77	1.28452	0.000443	0.0084	3.54815	16.4815	17.3688	14.8929	112.981	3.95551	202.223	37.8451	32.3933	162.426	102.961	55.8255	374.083	12.8068	87.9493	515.194	0	567.953	318.494	16.3626	0	55.4468	NA
NonamEVm016799t1	1202.21	5.62	1.71839	3.7e-07	3.74e-05	0	21.205	72.0034	84.4167	11.7331	3.90132	24.4661	124.711	37.6736	5.22548	0	315.916	4115.27	165.943	1295.99	8707.67	3958.52	1181.72	2504.18	364.996	1519.06	1934.08	Cuticle protein AMP1B
NonamEVm016831t1	2166.58	-2.64	0.803834	3.93e-05	0.00154	4220.38	5299.74	849.402	12215.7	656.54	2335.3	5762.45	2359.14	769.702	2378.23	3995.58	2567.12	327.203	538.866	1725.67	312.865	238.989	413.9	232.606	163.027	160.55	141.824	NA
NonamEVm016833t1	54.45	5.92	2.64188	1.06e-05	0.000569	0	0	0	0	64.9265	11.8364	6.63754	16.2277	24.7983	4.53125	9.97802	45.2387	529.667	15.7255	73.0255	280.816	0	98.5269	15.9315	0	0	0	NA
NonamEVm016848t1	1000.51	-2.82	0.963755	6.35e-05	0.00215	6178.32	1587.71	740.196	1525.92	283.737	1975.15	3202.28	492.5	868.256	2624.36	349.254	65.0983	410.044	394.893	259.097	0	140.282	472.778	71.9587	105.665	160.712	102.971	NA
NonamEVm016926t1	31.77	6.52	2.90842	9.45e-06	0.000522	0	0	0	0	0	1.96139	3.33471	0.499301	0	1.31285	0.808333	0	0	0	0	109.996	482.772	6.12469	0.702944	18.8378	70.3327	2.15405	NA
NonamEVm016938t1	34.14	-2.94	1.14542	0.000115	0.00341	106.565	41.0883	22.5984	92.831	26.4506	98.3151	90.5935	29.3109	34.6294	117.075	30.3211	6.47347	17.2064	18.5927	8.45912	0	0	0	4.21076	0	0	6.40362	NA
NonamEVm016968t1	1314.06	6.95	2.02687	2.13e-07	2.43e-05	0	0	11.5966	74.5108	0	3.96717	34.9081	47.1265	23.7805	68.5304	17.1488	61.2703	138.375	133.147	123.707	31.2382	0	2408.44	2604	9628.29	2773.34	10726	NA
NonamEVm016977t1	114.45	-7.12	2.72213	2.97e-06	0.000209	678.74	1133.02	66.9315	161.781	6.47316	279.512	3.33268	0	2.53054	4.52195	163.861	9.47318	6.36848	0.580664	0	0	0	0	0.690889	0	0	0	NA
NonamEVm017030t1	52.78	6.32	2.27554	1.85e-06	0.000139	0	0	2.88001	0	0	0	0	0	0	0	0	0.288323	0.470226	0.591941	0	799.045	124.135	188.248	40.1063	0	0	5.42288	NA
NonamEVm017059t1	46.9	-3.17	1.72264	0.000338	0.007	410.573	110.763	34.2488	10.509	13.1036	313.568	3.38162	2.07959	17.3613	12.4554	39.3073	0.594445	1.77961	0	0	0	0	0	6.35929	6.67101	0	49.1211	NA
NonamEVm017065t1	64.25	2.67	1.00867	0.000203	0.005	14.3299	16.6535	0	53.8211	32.6708	36.291	65.8846	42.2769	47.1072	114.452	57.9078	9.91359	79.8608	33.7913	49.4684	0	133.803	351.378	184.287	36.4615	0	53.0732	NA
NonamEVm017077t1	1075.07	-2.62	1.00775	0.000255	0.0059	8148.69	6005.32	1167.46	1733.05	128.014	1784.01	64.9463	53.6178	134.849	222.2	1988.01	71.501	48.5157	64.0879	32.912	281.662	77.9345	496.075	418.595	147.36	131.227	451.396	Profilin
NonamEVm017083t1	38.39	-3.04	1.55014	0.000345	0.00711	238.392	153.577	21.6976	18.5821	16.8016	256.633	3.4203	2.20209	5.67606	10.9707	70.3548	2.92667	1.02375	9.32449	1.27586	0	0	0	6.2054	13.1164	0	12.459	NA
NonamEVm017089t1	77.22	-4.35	1.25314	2.91e-07	3.08e-05	227.745	128.524	97.3463	94.4871	44.6639	75.6988	222.218	73.0472	99.6577	204.103	116.782	36.8072	106.978	108.003	31.1134	0	0	0	6.21755	13.0506	0	12.4541	NA
NonamEVm017230t1	69.99	-2.3	0.745141	0.000194	0.00483	149.318	181.573	72.8815	90.693	80.2161	92.2966	144.521	102.702	95.5232	77.3403	54.8819	68.3563	81.6086	84.1134	50.1881	0	0	43.6825	17.9023	24.716	0	27.3171	NA
NonamEVm017269t1	84.57	9.92	1.9073	5.87e-10	1.21e-07	0	0	0	1.24257	0.309129	0	0	0	0	0	0	0.573235	3.27298	0	0	203.431	348.75	462.783	667.178	86.1861	83.5934	3.22676	Cuticle protein AMP1B
NonamEVm017292t1	29.2	2.85	1.3982	0.000453	0.00851	3.70188	7.63692	0	5.7496	5.47956	4.09947	6.50489	1.88984	9.40397	1.8065	0	8.30655	21.2993	1.22472	7.53419	457.196	0	70.5489	30.0514	0	0	0	NA
NonamEVm017330t1	1010.41	-2.93	1.5528	0.000497	0.00901	1947.57	5049.75	915.318	4329.06	27.0953	1674.48	485.566	286.03	71.3288	232.64	3410.32	2588.77	127.713	150.503	370.967	140.601	0	0	89.8659	58.7822	0	272.669	Anti-lipopolysaccharide factor
NonamEVm017431t1	526.48	22.66	2.64896	9.86e-19	1.53e-15	0	0	0	16.1419	0.617181	0	0	0	1.01662	0	0	14.2165	5717.33	0	2.14813	2547.85	2342.53	764.954	68.3408	58.2456	40.6374	8.50993	NA
NonamEVm017432t1	25.77	-2.57	1.02657	0.000383	0.0077	90.8482	81.7501	12.3696	31.1835	35.6184	36.1826	31.7742	8.06891	29.763	48.8147	60.7384	9.1439	18.795	16.9352	22.5183	0	0	0	7.6702	17.8664	0	6.80045	NA
NonamEVm017456t1	67.67	-3.64	1.74813	9.02e-05	0.00281	389.101	286.601	100.119	228.61	11.4532	29.3836	15.708	8.7838	19.1911	22.1626	297.989	6.06331	7.50715	9.52426	7.94634	0	0	0	8.76419	0	0	39.8365	NA
NonamEVm017474t1	27.62	-2.86	1.44348	0.000492	0.00895	5.33251	56.5767	21.7635	34.7954	38.8149	17.8755	38.2605	23.5678	65.8034	77.6022	19.1493	15.664	4.56601	61.6433	21.3348	0	0	0	0	7.62612	97.1788	0	Tigger transposable element-derived protein 1
NonamEVm017478t1	29.86	-2.89	1.10697	0.000119	0.0035	144.144	126.18	11.6258	53.466	22.1793	41.8485	23.7231	10.7847	28.8354	44.5648	53.0091	14.2177	30.0384	11.6124	12.7859	0	0	0	9.67116	14.1368	0	4.15006	NA
NonamEVm017479t1	253.67	2.7	1.12555	0.000323	0.00681	20.168	20.047	54.8991	29.3575	326.713	77.1641	62.1047	115.28	162.443	69.5373	588.717	517.887	301.745	240.728	348.174	1018.86	0	816.503	760.059	45.4085	0	4.89931	NA
NonamEVm017524t1	44.59	-5.18	2.6811	3.46e-05	0.0014	352.474	276.123	94.6693	106.456	0	26.1166	3.56405	1.10285	0.79063	7.58431	105.146	0	0	1.82121	0.954163	0	0	0	0	0	0	4.10648	NA
NonamEVm017564t1	48.89	5.04	2.64383	3.98e-05	0.00155	0	0	0	0	0.307078	0	0.825832	0	0	0	4.79339	5.78021	0	0	0.855339	0	215.148	54.7561	31.2408	306.35	229.118	226.486	Red pigment-concentrating hormone
NonamEVm017565t1	364.42	-3.91	1.77259	4.47e-05	0.00166	2351.8	1812.75	147.789	442.119	50.6462	2198.09	47.8832	32.5218	21.7428	58.9797	523.787	127.61	2.77025	40.2692	29.9195	62.1886	0	0	22.8955	4.37369	0	39.1763	NA
NonamEVm017570t1	295.99	3.54	1.2233	9.6e-06	0.000526	7.85511	5.55869	25.6081	5.50248	51.7497	2.30767	11.158	154.508	68.5134	11.8045	3.79016	105.508	3.27581	105.135	79.2941	650.957	640.534	233.95	161.068	2177.91	807.689	1198.02	NA
NonamEVm017603t1	2536.84	8.23	1.22543	2.91e-14	1.74e-11	5.33801	1.18046	87.1156	12.445	9.56767	5.95541	1.24926	3.93979	3.04401	1.29696	0.39996	28.934	0	10.4992	18.3977	17031.5	15345.9	13749.7	5376.92	1197.84	613.331	2306	NA
NonamEVm017632t1	117.55	-2.35	0.81699	0.000303	0.00653	443.551	318.623	103.302	189.136	157.489	149.748	153.287	74.9888	224.162	258.335	71.3496	57.3746	94.1276	106.234	63.929	0	0	31.1583	71.1437	9.78415	0	8.28885	NA
NonamEVm017736t1	56.24	-2.13	0.719798	0.000421	0.00815	207.674	110.69	62.2817	111.729	70.1934	73.2775	100.11	45.1918	53.1363	87.969	96.9445	31.3795	34.7558	57.5979	26.0327	0	0	24.7271	33.9093	6.54067	0	3.13329	NA
NonamEVm017745t1	100.53	-3.92	1.42229	7.83e-06	0.000448	1130.05	480.131	54.5747	219.615	12.4495	14.9505	20.1513	21.2157	11.4153	38.9313	81.9545	11.0288	41.1517	15.8417	12.8278	0	0	23.3319	19.0038	0	0	2.93369	NA
NonamEVm017868t1	1483.59	-3.16	1.41297	0.000146	0.00401	11611.2	10070.3	1246.11	2938.42	65.3763	198.412	48.1495	39.0456	76.1572	187.288	4035.59	48.1711	32.3668	40.978	30.0223	140.621	415.98	0	240.811	151.331	406.286	616.357	NA
NonamEVm017903t1	193.14	3.4	0.970726	1.65e-06	0.000127	8.90105	50.7525	27.612	69.6872	24.6751	5.97063	74.5483	55.5312	48.1407	78.9709	56.7083	11.7535	102.329	24.4462	64.067	234.75	87.1881	1248.59	981.857	247.507	169.734	575.329	NA
NonamEVm017911t1	19041.4	-4.83	1.70722	2.44e-06	0.000177	112678	100960	6033.27	26673.5	894.15	33138.9	3531.95	1689.58	2035.22	5116.02	106085	5325.79	27.887	1936.99	6530.44	1539.24	254.199	870.093	534.489	84.1325	616.52	2355.33	NA
NonamEVm017928t1	252.48	18.41	4.43632	3.54e-07	3.64e-05	0	0	0	0	0	0	0	0	0	0	1.64098	0	4460.26	0	0	126.132	743.32	107.448	7.88846	98.7306	0	9.08559	NA
NonamEVm017985t1	6028.33	6.24	1.94835	4.51e-07	4.37e-05	100.124	6.93863	233.028	193.344	0.307953	1.76627	0.415605	0	1.51837	5.17824	20.5003	5.28146	52.5383	4.65366	1.13889	32509.2	6074.94	35422.9	23776.5	8018.25	7314.35	18880.4	NA
NonamEVm018047t1	1337.44	-3.35	1.5795	0.000133	0.0038	8992.09	8443.24	1722	3132.89	76.0736	193.214	53.4171	21.8286	35.2065	267.836	4501.47	47.5037	20.0364	18.2162	11.0602	241.583	0	59.2535	199.874	59.3772	155.685	1171.89	NA
NonamEVm018058t1	33.82	-3.19	0.951504	5.28e-06	0.000339	184.753	93.106	50.7355	59.6395	41.2901	75.314	27.855	8.85015	21.7801	31.0766	27.1532	18.5101	48.066	23.876	16.232	0	0	6.18638	9.6974	0	0	0	NA
NonamEVm018071t1	287.11	-4.44	1.56712	3.2e-06	0.00022	700.758	1380.82	457.363	949.841	13.2502	169.023	634.527	327.453	98.7192	573.588	831.837	17.8912	10.9523	22.0958	62.7236	0	0	43.4461	6.91734	15.2493	0	0	NA
NonamEVm018210t1	72.71	-3.51	1.17342	7.5e-06	0.000434	283.1	456.628	85.9082	103.003	75.584	84.0235	32.4528	30.4879	65.0167	85.971	105.934	22.7854	14.8492	50.6923	28.495	0	0	0	25.0284	12.7709	0	36.9221	NA
NonamEVm018292t1	33.62	-4.33	1.71676	1.03e-05	0.000561	198.684	134.391	28.5877	52.3139	7.02938	108.766	11.1003	23.5389	12.0812	18.7073	56.8281	3.9405	2.75565	6.38894	15.9486	0	0	0	2.0715	0	46.9584	9.47554	NA
NonamEVm018333t1	68.59	-2.95	1.31979	0.000236	0.00561	35.275	136.447	37.4493	189.851	100.033	55.2726	96.047	62.0418	25.1179	40.508	468.544	149.517	12.7896	28.0056	68.1123	0	0	0	3.89881	0	0	0	NA
NonamEVm018354t1	123.21	-2.41	0.904085	0.000422	0.00815	169.086	227.643	114.821	162.918	125.405	93.6644	361.742	195.66	233.782	451.602	66.9786	68.8887	153.444	119.647	56.2752	0	0	37.3199	17.2755	9.7904	0	44.6354	NA
NonamEVm018451t1	66.12	4.22	1.63303	9.42e-06	0.000522	0	0	5.05141	11.934	12.999	0	8.96535	29.0555	58.6916	33.8555	3.84801	34.6142	53.6056	101.649	63.116	306.463	0	119.481	75.1967	35.4096	246.532	254.216	NA
NonamEVm018477t1	4749.12	3.19	1.32771	9.21e-05	0.00286	1054.11	659.101	365.987	4631.98	1.85165	500.476	231.093	67.693	175.736	177.513	18.8358	281.828	544.867	18.7274	94.355	18064.1	63884.5	7928.53	2851.65	1266.35	262.135	1399.25	NA
NonamEVm018482t1	31.62	-4.01	1.42706	5.61e-06	0.000355	134.64	68.0272	30.2706	27.2832	14.7753	59.1077	98.3143	14.2326	34.8625	118.321	36.26	6.7571	16.5047	22.1311	8.94866	0	0	0	2.08013	0	0	3.15298	NA
NonamEVm018517t1	56.05	-2.99	1.07335	5.4e-05	0.00192	156.568	82.5363	31.9627	64.6471	60.9883	262.929	111.521	37.2597	59.1874	185.374	31.8859	26.4916	39.1517	37.7437	31.54	0	0	0	8.98105	3.26273	0	1.03793	NA
NonamEVm018622t1	63.21	-4.97	1.3503	8.01e-08	1.08e-05	109.399	135.03	29.7869	72.225	68.8292	91.2035	199.899	85.8841	138.075	194.33	74.7721	19.1359	56.4435	74.939	28.296	0	0	0	1.51559	7.48146	0	3.47009	NA
NonamEVm018657t1	17732.2	13.48	1.29182	2.76e-26	1.43e-22	10.7033	8.28076	2.91211	7.48321	0	3.98596	0	0	0	0	0	0	0	0	0.4283	47246.2	129177	94479.1	116572	2166.41	278.985	153.788	NA
NonamEVm018670t1	561.05	-2.28	0.777192	0.000313	0.00666	1102.95	953.983	2204.79	1442.24	294.244	1122.42	1053.22	277.227	320.878	898.45	492.537	160.576	248.005	243.503	310.498	156.352	0	192.557	302.136	100.149	228.374	238.111	cAMP-responsive element-binding protein-like 2
NonamEVm018675t1	38.37	-3.2	1.0659	1.58e-05	0.000784	49.8336	81.3747	40.6965	90.7754	25.569	53.8192	59.1054	24.9995	52.6125	60.7094	74.5306	23.6923	115.129	47.0276	32.8162	0	0	0	4.1446	3.2621	0	4.14911	NA
NonamEVm018764t1	462.67	-2.77	0.99277	0.000104	0.00314	1431.04	1340.6	482.542	1422.74	171.151	1375.98	599.809	180.837	75.2059	325.123	1148.42	135.232	9.2913	15.8431	89.7997	140.556	38.1201	0	88.591	281.455	392.432	433.9	Single insulin-like growth factor-binding domain protein-2
NonamEVm018786t1	81.05	2.48	0.994188	0.00051	0.00921	19.3416	11.6721	17.3344	13.6007	66.5195	5.87398	203.377	16.0386	22.7549	55.6903	17.1527	44.5589	278.673	7.23301	41.2786	340.552	137.621	330.486	129.709	18.4085	0	5.24482	NA
NonamEVm018806t1	2851.12	5	2.34648	2.12e-05	0.000951	32.0433	14.1651	23.2498	250.152	3.70207	47.744	259.893	10.8171	18.2488	143.12	35.1572	0.280089	42727	0	17.5194	12631.3	1447.03	3359.19	1099.42	96.0048	301.023	207.631	NA
NonamEVm018826t1	113.04	-2.27	0.807923	0.000438	0.00836	643.285	146.401	88.776	145.653	94.3628	331.42	155.019	61.8098	107.854	93.7229	71.4036	59.6753	111.085	117.948	76.7761	0	44.1311	12.4625	55.3042	50.0543	0	19.7137	NA
NonamEVm018854t1	5523.04	11.35	2.02995	2.48e-10	5.67e-08	11.3993	0.987061	8.95479	5.21104	2.99737	0	0	3.72292	0	0.551857	26.4768	11.2674	4682.25	0	0.363913	12272.8	78618.7	19776.6	4621.66	584.607	447.664	430.668	NA
NonamEVm018956t1	85.84	-2.44	0.977572	0.000554	0.0097	552.168	201.006	14.4301	111.516	123.347	118.03	33.1555	60.5317	67.8176	93.2675	84.6434	40.8294	141.993	79.271	77.7579	0	0	24.5627	40.2013	20.7524	0	3.15389	NA
NonamEVm019023t1	157.23	-2.57	0.912682	0.000183	0.00469	1056.46	307.236	84.9902	118.638	67.3636	315.095	119.454	105.231	129.175	170.87	132.223	76.4961	204.544	171.782	79.9334	54.5559	0	0	87.8834	39.636	97.8917	39.5021	NA
NonamEVm019057t1	32.13	-21.05	3.2193	6.06e-12	2e-09	459.605	88.4327	67.5511	3.72693	0.928127	0	1.65804	0	0	0	83.2173	0	0	0	1.73171	0	0	0	0	0	0	0	NA
NonamEVm019084t1	2368.33	9.64	2.43644	8.1e-08	1.08e-05	13.7882	0	7.01383	52.0093	2.54973	3.79878	4.84785	6.46837	1.48844	0	96.4224	1.6725	3031	0	2.51872	24234.2	22643.4	1097.31	865.87	21.4985	0	17.3378	NA
NonamEVm019138t1	189.53	-3.73	1.06027	6.22e-07	5.64e-05	791.386	439.063	310.681	211.153	94.0205	895.008	138.781	89.4659	111.709	193.466	260.381	77.5911	186.707	124.926	171.503	0	0	41.5188	25.2088	1.04492	0	6.00392	NA
NonamEVm019163t1	37.8	-3.59	2.34001	0.000333	0.00695	301.235	123.503	0	59.5172	20.3051	29.6016	0	13.2715	12.6488	61.4719	108.924	0	0	31.4375	23.906	0	0	0	0	18.548	0	27.2376	NA
NonamEVm019212t1	91.38	-3.35	1.06481	6.51e-06	0.000396	854.937	385.861	56.735	108.247	38.2151	93.8169	48.3143	26.4686	50.0951	49.0861	48.2321	24.2358	53.6673	64.4416	33.2446	0	0	12.46	45.5901	3.26168	0	13.4729	NA
NonamEVm019257t1	108.65	-4.01	1.54986	1.2e-05	0.000633	1194.05	599.993	79.0512	170.582	11.535	106.372	8.0257	12.6723	19.1419	14.1983	107.055	6.9315	2.13293	8.01575	5.20321	0	0	2.05011	35.0691	0	0	8.26741	NA
NonamEVm019262t1	57.53	-3.22	1.12458	2.39e-05	0.00106	508.335	368.015	16.9451	50.2903	13.7656	43.4018	13.4696	31.9169	15.7154	11.1109	54.1966	8.38288	21.6922	24.199	5.17054	0	0	23.6468	18.9354	11.0805	2.23222	23.0671	NA
NonamEVm019265t1	675.77	2.79	0.795091	1.1e-05	0.000592	127.377	182.435	43.0104	112.186	189.197	159.421	186.771	291.803	234.866	198.442	411.787	143.002	121.897	239.894	241.105	408.009	4715.27	588.109	201.144	2220.1	3008.47	842.752	NA
NonamEVm019286t1	53.53	-3.12	1.527	0.000247	0.00575	103.496	22.2117	85.6237	38.1854	2.75915	36.6443	20.1522	18.7862	3.54102	20.1342	1.59921	23.0769	0.464697	0	21.4156	0	0	0	2.08758	92.1845	244.139	441.06	NA
NonamEVm019302t1	643.84	19.27	2.16384	8.76e-20	1.51e-16	0	0	0	0	969.452	0	420.144	4156.78	2123.5	1268.32	5.19871	480.57	292.409	1709.27	964.395	0	186.004	0	201.663	1039.11	11.2299	336.327	Actin, muscle-type A2
NonamEVm019386t1	260.84	-3.6	1.8299	0.000128	0.00371	3885.35	489.924	340.151	392.074	13.8824	131.397	4.16563	4.91487	23.8209	81.5713	247.238	0	1.8274	13.971	7.26195	0	31.9915	0	40.8583	0	0	28.1414	NA
NonamEVm019390t1	65.27	-2.67	0.83324	4.45e-05	0.00165	257.969	207.538	68.2746	188.982	63.1566	85.6096	69.9111	43.1647	58.6993	89.8201	116.826	11.7222	33.2612	23.2386	49.0355	0	0	31.07	20.7353	7.61726	0	9.35122	NA
NonamEVm019397t1	20.69	-2.55	0.936119	0.000236	0.00561	49.8391	43.6389	33.4339	46.013	29.8831	9.96891	52.4503	11.7639	18.7181	31.6454	11.5581	20.9018	30.0292	13.3528	33.6677	0	0	0	5.52591	6.52379	0	6.22237	NA
NonamEVm019456t1	440.2	5.07	2.53135	2.99e-05	0.00125	0	2.36015	1.45513	3.73295	52.3899	0	765.202	1188.75	1019.48	865.887	0	641.141	601.339	1738.21	916.986	31.2897	0	853.999	447.481	267.36	190.095	97.34	NA
NonamEVm019524t1	47.89	4.96	2.95337	7.75e-05	0.00249	0	0	0	0	0.306521	0	0	0	1.00884	4.51983	3.97986	25.2804	22.4608	8.71681	28.1096	201.953	0	0	243.231	4.355	509.557	0	NA
NonamEVm019534t1	1530.28	-4.4	1.81315	1.33e-05	0.00069	1588.19	2803.27	271.498	9586.48	209.683	1131.53	5990.1	1786.91	306.429	1845.84	3276.75	2977.34	27.9476	153.625	1623.51	0	0	0	59.5176	5.45299	0	21.9976	NA
NonamEVm019537t1	50.48	-2.54	0.848228	0.00012	0.0035	279.885	148.191	40.452	66.9494	32.9216	88.7132	44.3775	22.1322	46.0539	84.1616	51.4899	12.6505	60.1028	33.2038	39.7196	0	0	30.7689	18.0119	5.45881	0	5.24585	NA
NonamEVm019594t1	139.02	15.52	6.45746	8.52e-06	0.000477	0	0	0	0	0	0	0	0	0	0	0	0.295123	2444.59	0	0	173.984	252.928	108.764	4.29714	73.5508	0	0	NA
NonamEVm019713t1	30.53	-3.8	1.83176	7.44e-05	0.00242	404.832	122.051	14.3032	73.8721	0.926424	17.4796	7.4072	1.00999	1.51246	3.87758	11.7169	1.13656	0	5.23744	2.1781	0	0	0	4.15094	0	0	0	NA
NonamEVm019735t1	20.28	-3.5	1.73959	0.000135	0.00383	100.942	99.9824	7.21956	53.3158	1.23125	102.35	33.1775	0	0.506462	1.29634	1.99776	28.4628	2.29949	1.16663	11.544	0	0	0	0.693639	0	0	0	NA
NonamEVm019771t1	30.75	-3.39	1.36758	4.78e-05	0.00173	330.308	101.308	18.8397	29.806	15.3979	75.3191	21.6097	4.42121	4.04936	6.46903	34.7141	7.283	2.28613	9.30933	6.4023	0	0	0	8.99712	0	0	0	NA
NonamEVm019834t1	31.97	-2.6	1.02863	0.000335	0.00696	163.259	40.6594	28.1776	39.1455	22.5483	22.6566	69.2567	71.6268	31.7897	27.9686	19.1609	39.6285	30.8646	29.8976	22.295	0	0	0	10.4503	7.7722	0	26.1924	NA
NonamEVm019835t1	695.42	5.19	2.71976	3.65e-05	0.00146	0	0	1.20138	0	510.202	0	2472.28	3146.05	2000.01	2284.34	4.60925	379.449	249.792	1302.71	1204.65	64.8932	222.135	15.3399	247.936	900.47	125.669	167.596	Actin
NonamEVm019853t1	752.85	11.94	3.7325	1.58e-06	0.000123	0	0	0	0	0	0	2.98253	0	0	0.735365	0	2.2771	0.785193	0	0	3401.47	12924.6	84.8885	131.185	13.7145	0	0	NA
NonamEVm019872t1	35.11	3.2	1.67692	0.000279	0.00623	0	0	1.41942	8.58899	8.25047	7.65415	16.3754	11.3595	42.3916	23.9914	3.19231	44.755	35.7946	42.1009	41.9097	0	0	0	96.6147	184.242	82.556	121.333	NA
NonamEVm019923t1	84.8	4.28	2.42139	9.73e-05	0.003	0	0	1.43545	29.6244	21.4658	0	93.6822	75.2158	112.092	104.134	2.39118	99.8016	196.435	447.77	104.937	0	0	134.091	266.521	157.073	0	18.9697	NA
NonamEVm019942t1	313.83	4.51	1.94095	1.66e-05	0.000811	29.867	1.28235	4.29699	14.7626	48.2594	0	1.80804	3.91071	19.6018	0	0	64.0762	1324.46	19.1063	64.0765	866.9	3742.16	396.046	82.2316	62.9183	105.137	53.2865	NA
NonamEVm019994t1	29.91	-2.49	0.965796	0.000403	0.00797	82.6478	34.98	41.6267	35.6506	41.5871	11.7912	125.455	33.5092	66.7864	75.4784	12.6276	19.0874	10.8376	33.3615	15.6161	0	0	6.13391	5.47403	4.31018	0	1.03045	NA
NonamEVm020015t1	51.43	-2.6	0.908075	0.000146	0.00402	122.829	87.2911	63.9639	160.447	30.8135	53.8266	131.559	45.1102	67.8066	112.408	39.0694	23.9792	34.1407	68.5291	33.2515	0	0	18.6666	7.60059	25.0169	0	5.18833	NA
NonamEVm020071t1	293.94	4.56	1.6262	3.22e-06	0.00022	7.07097	17.6837	35.9348	1.24213	21.9601	9.69454	80.0008	20.9859	24.003	45.2698	0	20.4688	20.6865	5.9157	16.4423	1455.09	4379.15	157.5	139.938	0	0	7.59702	NA
NonamEVm020125t1	45.5	-4.03	1.24843	1.15e-06	9.27e-05	347.111	100.787	20.0932	108.692	23.6367	50.6873	70.5991	22.1718	39.9465	107.582	47.1074	4.24313	7.84698	7.58617	8.97527	15.5487	0	0	5.54991	5.46647	0	7.40861	NA
NonamEVm020160t1	1897.38	-3.18	1.55947	0.000222	0.00539	8418.06	9586.26	548.76	3266.46	126.799	15819.6	72.3431	60.6877	63.9499	133.777	2743.18	66.0286	52.9575	49.6717	26.1322	0	245.587	80.1354	174.429	27.3793	0	180.121	Astakine
NonamEVm020198t1	8826.37	2.96	1.5074	0.000403	0.00797	0	2.35939	226.557	482.582	0.308305	0	597.724	2572.09	1113.43	662.67	211.595	401.317	1313.87	2807.24	1752.83	2393.27	478.472	3630.66	6733.67	55665.4	72198.7	40935.4	NA
NonamEVm020300t1	78.34	5.58	1.4348	3.38e-08	4.94e-06	7.1498	3.44017	1.59816	1.38106	0.300701	1.893	7.74714	4.52125	2.48048	5.7321	2.74435	0.961612	6.37771	3.44409	0.83998	730.474	183.99	685.836	17.8074	5.37981	46.1395	3.14701	NA
NonamEVm020407t1	96.26	2.84	1.34739	0.000404	0.00797	0	6.09192	13.5859	7.01697	126.246	11.9002	91.4604	52.2753	114.073	102.782	27.2309	54.5649	308.532	46.7567	121.713	381.629	0	389.061	84.0402	0	136.199	42.6455	NA
NonamEVm020446t1	71.22	-2.51	0.980338	0.000405	0.00798	202.93	162.768	40.7055	128.096	77.3284	145.567	138.21	56.8572	129.51	159.516	50.2175	40.1278	36.8509	81.8564	66.9082	0	0	0	25.5567	21.7451	0	2.07386	NA
NonamEVm020453t1	375.39	-1.57	0.452896	0.000233	0.00557	579.264	638.795	358.125	564.001	347.231	401.551	585.993	324.651	494.153	852.357	462.248	210.406	309.395	381.04	352.241	109.58	103.215	193.29	200.425	246.923	312.478	231.19	NA
NonamEVm020498t1	204.17	3.41	1.85287	0.000225	0.00543	10.5646	5.89207	12.847	2.48188	1.5476	1.90417	0.412743	1078.85	0.513403	0.66239	0.406682	0	1.43512	2.99104	3.49276	2257.03	787.777	119.42	2.84279	35.942	149.097	15.624	NA
NonamEVm020509t1	22.6	-3.53	1.92811	0.000193	0.00483	292.799	42.3778	18.637	29.7638	1.85375	71.4162	2.0682	1.99994	1.53149	3.93714	29.4746	0	0	0	0	0	0	0	1.40714	0	0	0	NA
NonamEVm020531t1	25.1	-2.76	1.15124	0.000281	0.00624	126.229	71.4151	41.3103	67.8347	15.6744	76.6013	32.4827	19.9223	9.65422	35.2878	27.7359	6.04562	0	7.07542	7.32657	0	0	0	7.70875	0	0	0	NA
NonamEVm020560t1	20.6	-2.81	1.39657	0.000519	0.00928	55.2533	47.2211	30.5762	18.6722	29.285	55.9763	97.0989	14.6997	8.0965	59.407	0	16.1409	11.3593	2.90179	5.11361	0	0	0	1.38113	0	0	0	NA
NonamEVm020585t1	34.72	-2.65	1.04392	0.000269	0.0061	189.329	74.0824	50.4749	37.1835	10.4665	43.1888	72.5321	24.6565	33.4443	98.6317	42.3878	2.26057	7.3777	30.956	17.5472	0	0	18.3851	5.55559	5.47068	0	0	NA
NonamEVm020588t1	28.58	-3.36	1.1072	9.66e-06	0.000528	153.841	54.045	49.0085	63.1592	30.752	27.4855	27.7487	20.6802	37.4531	46.0052	28.3545	4.79377	21.6277	26.8268	28.635	0	0	0	6.24093	2.18516	0	0	NA
NonamEVm020591t1	952.49	5.25	1.29959	1.67e-08	2.59e-06	0	1.17775	23.1179	38.4839	36.3763	0	51.4801	217.686	204.472	127.318	29.626	227.301	429.97	289.988	224.081	437.432	259.719	159.716	1566.22	7347.32	2069.89	7213.34	Cytochrome c
NonamEVm020596t1	48.81	-2.35	0.832701	0.000332	0.00694	153.86	122.149	67.7776	55.7133	50.0937	49.1601	91.9356	46.2079	60.1673	57.5816	47.4625	45.2708	55.0663	62.2969	43.9598	0	0	0	29.7715	18.5483	0	16.7955	NA
NonamEVm020612t1	1257.46	10.18	1.69876	1.03e-11	3.27e-09	0	2.35988	8.70427	7.46346	0	0	0.416192	17.7341	10.6533	0	0	32.6153	8.26042	23.338	0	3348.58	4535.21	11112.9	6014.5	1307.61	253.357	980.38	NA
NonamEVm020630t1	20.3	-2.45	0.942474	0.000446	0.00845	108.383	23.5669	18.8522	37.2695	35.7277	9.92262	31.18	6.87472	23.2824	43.3301	19.5481	11.4735	23.2967	26.1723	14.9349	0	0	6.19428	5.5348	0	0	1.04269	NA
NonamEVm020800t1	44.68	-3.55	1.55047	6.15e-05	0.00209	49.4439	197.258	30.2121	196.766	24.2923	246.417	74.0559	58.1977	15.6981	1.94648	27.9816	16.9787	0.92348	25.1183	14.9765	0	0	0	2.7779	0	0	0	NA
NonamEVm020805t1	24.43	-2.86	1.38135	0.000415	0.00808	118.53	90.5185	24.5137	43.3687	20.9251	60.8674	19.4755	3.9426	10.6365	14.2673	14.3886	7.62265	5.98905	16.3439	9.8381	0	0	0	4.1642	0	72.0958	0	NA
NonamEVm020866t1	27.02	-2.85	1.38223	0.000431	0.00825	165.363	103.735	10.1613	63.3857	7.39279	147.135	5.82342	7.36045	15.6875	20.0373	28.7128	3.91127	0	2.90594	5.11798	0	0	0	5.53126	0	0	2.08082	NA
NonamEVm020885t1	111.65	20.98	2.60791	1.01e-16	1.05e-13	0	0	0	0	15.3977	11.9457	89.026	3.43147	11.1273	26.4787	0	7.52943	698.827	9.28982	14.4894	0	0	1379.52	185.127	0	0	4.15214	NA
NonamEVm020886t1	663.02	-3.64	1.16294	3.42e-06	0.000231	4596.09	2374.09	448.052	862.618	132.303	3330.93	226.238	99.6384	177.775	314.278	1104.16	84.8664	77.4782	118.014	146.791	0	41.0325	143.182	125.882	21.7766	52.0673	109.098	NA
NonamEVm021012t1	106.31	-4.04	1.48386	7.45e-06	0.000433	754.443	127.596	62.9966	307.171	11.3505	56.2857	455.853	125.292	43.9922	174.468	17.9721	16.1691	12.0333	11.1001	23.9503	0	0	0	15.2788	19.7045	80.7477	22.3235	NA
NonamEVm021078t1	616.52	6.64	1.96713	2.5e-07	2.73e-05	1.77116	0	13.002	142.534	3.07539	0	11.1954	67.8152	73.8449	98.328	11.5672	50.2547	160.373	193.815	65.2961	265.077	0	3835.34	1137.3	832.284	5871.49	729.101	NA
NonamEVm021110t1	132.6	-2.91	1.03471	6.46e-05	0.00218	1103.56	454.879	84.1289	207.486	29.2603	260.087	68.6041	23.0753	53.1419	120.273	87.3593	26.5743	25.5708	77.9212	49.4922	0	0	12.394	85.7756	55.5589	58.747	33.3485	NA
NonamEVm021118t1	119.57	-3.01	1.441	0.000286	0.00631	570.39	612.644	252.392	158.997	30.7893	581.966	25.7741	12.7559	31.3638	53.6356	190.167	12.853	5.0173	0	7.67505	0	0	0	40.0934	6.53127	0	37.4663	NA
NonamEVm021128t1	27.02	-2.67	0.950645	0.000136	0.00384	119.232	47.1851	40.6825	47.2624	18.493	47.7799	80.7571	15.7068	33.4154	65.9523	20.3467	4.46973	16.4177	7.55762	7.67981	0	0	18.6413	2.76651	0	0	0	NA
NonamEVm021258t1	13257.3	-6.73	2.26028	9.54e-07	7.91e-05	34577.5	56137.2	3697	8598.56	821.005	71126.9	615.1	1171.11	468.886	782.938	106207	1465.67	56.1962	421.559	4078.73	0	192.263	88.6533	74.5714	87.9016	0	990.974	NA
NonamEVm021307t1	118.08	4.52	1.50068	1.51e-06	0.000118	3.55867	1.18303	23.196	2.49377	1.54898	0	2.08433	0	0	0	0	1.99482	0	0	0	1506.67	249.69	449.239	221.753	8.81824	104.285	21.3096	NA
NonamEVm021363t1	44.59	-3.28	1.70728	0.000236	0.00561	180.781	251.727	69.4007	73.1627	17.5353	260.68	1.65951	0.98267	24.2813	13.584	60.2315	13.1861	1.37371	4.65549	0	0	0	0	5.53703	0	0	2.09301	NA
NonamEVm021367t1	389.34	11.62	1.68441	1.29e-13	6.26e-11	1.54473	0	0	0	11.4916	5.19486	8.82963	16.9988	7.02284	0.559992	12.4425	17.8059	12.2216	32.8225	7.02136	2659.07	127.867	2865.57	2715.18	39.5893	0	24.253	NA
NonamEVm021385t1	108	2.75	0.881311	4.29e-05	0.00162	35.6159	46.0604	23.2551	14.9418	33.0314	23.8669	20.834	16.7348	36.5262	29.1701	12.3958	19.355	64.1037	8.74446	3.42163	1252.85	344.222	322.815	67.9594	0	0	0	NA
NonamEVm021386t1	1067.77	4.12	2.16779	8.01e-05	0.00256	0	44.8365	33.3942	277.402	302.563	23.8387	0	11.3117	109.99	3.88618	0	324.619	7535.97	195.139	132.479	8151.47	1541.71	4204.04	372.785	169.157	0	56.409	NA
NonamEVm021397t1	123.12	-7.96	1.62737	8.78e-10	1.79e-07	140.375	473.642	335.058	322.974	4.31086	166.814	461.034	187.942	79.4312	281.153	198.57	10.6213	3.19389	8.13684	31.1319	0	0	0	0	0	0	4.16465	Neuroparsin-A
NonamEVm021403t1	34.91	-3.11	1.07937	2.98e-05	0.00125	125.527	106.036	72.192	89.4686	20.6485	11.2375	45.1942	8.89208	40.9861	9.02536	32.1349	20.176	46.019	63.1582	25.0537	0	0	4.12645	8.19769	8.92678	0	31.0404	NA
NonamEVm021410t1	27.9	-2.3	0.85721	0.00056	0.00978	108.525	69.5829	21.7875	36.0605	44.0673	29.8492	54.1025	21.5957	35.9421	49.137	29.9185	11.1753	14.5947	38.3674	18.3446	0	0	12.422	9.68214	8.7113	0	0	NA
NonamEVm021420t1	40.84	-2.23	0.806631	0.000552	0.0097	128.226	41.3031	71.2656	89.5887	55.4854	49.8671	89.5477	39.7286	50.6198	107.92	23.928	23.1476	32.7821	27.8846	25.5863	0	0	37.3538	4.14706	0	0	0	NA
NonamEVm021430t1	137.84	-2.5	0.802572	9.87e-05	0.00303	412.266	233.327	108.783	155.301	284.284	115.145	253.621	118.816	240.91	292.927	111.294	88.9587	137.45	175.617	117.759	0	0	24.7862	54.6484	19.6095	72.3025	14.591	NA
NonamEVm021491t1	1980.36	3.89	1.42942	9.02e-06	0.000503	198.272	44.2965	222.422	516.765	0.374298	21.5765	44.1364	12.0891	7.06686	24.9249	1.3256	5.70522	1.29002	6.55404	5.24478	2579.82	23801.4	1383.13	1594.04	3318.89	4421.04	5357.59	NA
NonamEVm021521t1	32.95	3.3	2.28027	0.000561	0.00978	0	0	2.91338	0	0	9.83975	0	1.515	0	0	0	0	0	0	0.43748	110.883	10.7357	430.293	114.437	39.2376	4.57377	0	NA
NonamEVm021653t1	761.76	-3.03	1.32702	0.000178	0.0046	2018.7	3206.83	150.948	723.93	111.659	1641.57	272.208	1208	429.925	500.23	2447.94	626.018	49.0076	822.327	1905.88	0	43.1699	167.286	11.0917	58.9656	0	362.927	NA
NonamEVm021663t1	57.16	-4.08	1.81503	3.16e-05	0.00131	566.807	117.814	40.6119	53.4116	17.8578	345.552	11.6395	4.90646	13.6588	10.34	45.4507	3.35347	0.456185	9.87915	1.27924	0	0	0	6.2218	0	0	8.32747	NA
NonamEVm021716t1	17458.8	17.06	2.90292	4.96e-10	1.05e-07	0	0	0	1.07093	0	3.67357	0	0	0	0	43.5517	0	0	0	0	43726.5	326942	5628.62	7703.78	33.9992	8.15469	2.84589	NA
NonamEVm021742t1	1566.88	12.43	3.23625	3.66e-07	3.74e-05	0	1.40167	0	1.47663	0	2.2921	0	0	0	0	0	0	33.6332	0	0	7138.73	26328.1	212.432	642.394	27.1601	74.5244	9.1847	NA
NonamEVm021764t1	69.94	-3	1.70018	0.000532	0.00944	474.089	487.3	21.2986	74.0067	14.1	56.4913	0.649749	0.847324	3.48556	5.57585	348.407	3.41567	3.16471	1.00357	1.10341	0	0	0	15.0556	2.82084	0	25.8621	NA
NonamEVm021789t1	28.9	5.08	2.49247	2.68e-05	0.00116	0	0	0	6.15476	1.22577	0	20.6194	12.7727	34.3106	40.6841	2.3895	19.9926	41.3653	44.7951	28.1327	0	0	85.2756	165.324	96.9585	0	35.796	NA
NonamEVm021816t1	17076	10.5	1.41931	1.29e-15	9.53e-13	121.002	4.73528	26.1299	268.462	0	39.3628	5.8438	4.95416	2.03835	6.52056	1.20592	7.36728	19.871	1.7603	11.5929	80540.9	265181	16240.1	10493.9	1641.55	312.881	741.079	NA
NonamEVm021865t1	47.78	-4.04	1.86167	4.16e-05	0.00158	611.302	2.24415	16.5946	95.7625	4.98268	45.5179	28.187	20.9866	16.1545	15.3617	68.6348	79.0439	15.5857	10.4952	10.8079	0	0	0	4.60044	0	0	4.93422	NA
NonamEVm021944t1	138.16	-2.34	0.834542	0.000371	0.00754	145.535	326.278	76.9867	438.648	137.152	378.767	342.079	98.1617	101.839	256.466	155.431	102.704	77.9112	106.824	165.283	0	0	6.00726	50.2358	11.0079	49.2922	12.9265	NA
NonamEVm022097t1	204.53	4.09	2.00044	5.7e-05	0.00198	22.0351	0	7.41741	11.6603	0	0	0.428214	0	0	2.09489	0	0	0	0	0	1016.67	162.25	2105.16	890.601	48.5731	4.71863	228.084	NA
NonamEVm022221t1	639.06	-5.46	1.74457	6.38e-07	5.75e-05	7328.15	3734.47	396.141	964.55	35.0598	129.396	30.2245	29.0715	53.6657	155.607	764.726	28.8044	42.3955	68.2831	21.3811	93.4998	0	12.2408	28.4493	18.5853	0	124.512	NA
NonamEVm022235t1	62.8	13.83	8.01686	2.61e-05	0.00114	0	0	0	0	0	0	7.43211	1.80136	0	0	0	0	0	3.09761	0	0	0	1224.98	144.397	0	0	0	NA
NonamEVm022241t1	86.4	-2.74	1.25477	0.000458	0.00855	44.2424	196.227	101.029	458.294	19.9808	257.972	55.5224	36.365	50.5639	477.375	49.0527	28.3725	9.62766	44.8169	37.552	0	0	0	10.3828	6.54501	0	16.7752	NA
NonamEVm022270t1	267.66	2.94	1.08179	7.51e-05	0.00243	36.2988	90.9343	22.9598	20.0892	73.7007	72.5435	49.8427	58.9518	96.9175	91.5668	22.0437	27.625	712.587	48.3415	79.6571	1262.59	9.24129	1882.84	1053.93	48.2313	17.0488	110.632	NA
NonamEVm022400t1	4648.27	-2.77	1.27885	0.000427	0.00822	17689.7	22426.1	3107.46	3889.85	184.902	35641.1	709.727	171.696	88.2224	622.295	14229.4	212.631	56.5677	143.41	364.675	941.939	878.971	148.057	125.788	162.954	136.088	330.33	NA
NonamEVm022407t1	231.57	-4.3	1.93019	2.68e-05	0.00116	520.461	1106.89	5.08426	579.259	37.2282	112.211	119.002	237.365	42.661	1586.5	537.564	13.7521	1.61439	14.0189	100.297	0	0	0	14.7942	29.1542	0	36.67	NA
NonamEVm022489t1	80.41	-3.34	1.05507	6.56e-06	0.000398	697.93	397.579	59.6144	124.394	16.9491	81.7613	44.1369	19.6132	17.7118	36.1782	110.037	10.3156	8.19297	10.4536	9.80521	0	0	31.1203	26.9479	16.3152	40.7217	9.33747	NA
NonamEVm022495t1	77.48	-2.62	1.12584	0.000465	0.00863	65.8728	47.1847	114.866	64.6777	30.1949	993.275	155.298	22.5476	23.273	67.8137	33.0818	20.8991	22.7468	12.1918	21.3094	0	0	0	8.289	0	0	1.03685	NA
NonamEVm022546t1	153.34	-3.53	1.09232	3.01e-06	0.00021	586.235	443.793	110.62	225.266	156.578	131.87	255.816	107.806	270.713	315.773	148.268	99.659	121.807	198.498	90.3426	0	0	6.23593	36.602	48.9093	0	18.6373	NA
NonamEVm022556t1	46.19	18.74	3.09383	1.69e-10	4.22e-08	0	0	0	0	0.934551	5.84914	1.25185	0	0	2.64464	159.901	2.03513	399.667	0	0	126.05	265.561	48.7397	3.54382	0	0	0	NA
NonamEVm022563t1	117.66	-2.87	1.08326	0.000113	0.00336	1191.18	413.417	54.0127	258.368	20.8459	156.759	21.7415	27.8075	41.0457	39.096	102.214	15.2098	26.6765	53.4953	25.3545	46.5119	0	17.9274	47.5135	11.0279	0	18.4205	NA
NonamEVm022692t1	74.25	-2.68	0.899199	8.16e-05	0.00259	302.144	188.527	81.2543	146.593	84.0566	157.007	109.349	38.258	98.1309	116.296	93.2767	28.7637	30.0877	55.1893	47.7474	0	0	0	38.7023	9.79405	0	8.3198	NA
NonamEVm022851t1	447.78	3.18	1.69779	0.00031	0.00663	39.0292	11.7896	13.0134	3.728	3.39495	31.4943	1.66219	3794.84	1.01606	2.60216	6.81541	1.13308	7.39598	7.61218	11.1558	2908.88	2107.16	227.357	9.74694	82.2683	553.569	25.3993	NA
NonamEVm022877t1	82.13	-3.02	1.13271	7.19e-05	0.00237	568.392	327.947	89.5456	121.433	25.5193	126.186	54.3044	12.7738	55.1173	100.892	94.5093	21.6133	43.0621	44.8057	52.9071	0	0	0	42.9068	19.6299	0	5.23672	NA
NonamEVm022892t1	28.22	-2.6	0.927472	0.000168	0.00445	154.894	86.4004	28.3947	27.7825	19.5163	65.575	25.9163	22.5436	36.2224	27.677	52.6568	5.20522	12.4324	15.5853	15.0194	0	0	5.87031	12.5153	0	0	6.52649	NA
NonamEVm022910t1	97.46	4.27	1.04017	1.85e-08	2.82e-06	19.2916	3.60431	5.91393	6.13117	8.3055	4.04607	28.7413	15.0798	42.4278	19.1246	102.199	137.43	79.3502	34.4207	71.3349	732.837	91.1763	183.43	348.589	106.628	53.5207	50.517	NA
NonamEVm023083t1	14526.3	5.61	1.80234	6.53e-07	5.82e-05	0	8.2445	128.605	765.983	4.31583	0	888.902	3481.21	973.623	1246.45	62.0514	777.885	2116.74	1724.58	1262.14	4515.01	1402.87	6783.04	13096.7	112242	88775.8	79322	Actin, muscle-type
NonamEVm023174t1	53.44	-2.47	0.814664	0.000135	0.00382	254.619	138.037	52.3488	73.3956	30.2007	65.8181	68.2907	21.5735	53.1352	77.5222	23.5219	26.2041	66.4466	49.9428	47.3194	0	0	18.675	26.9468	10.8762	52.0356	18.672	NA
NonamEVm023196t1	2258.77	13.68	3.63365	6.15e-07	5.61e-05	0	0	0	2.52463	0	0	0	0	0	0	0	0	0	0	0	8336.68	39699.3	520.376	1130.72	1.14888	0	2.29753	NA
NonamEVm023301t1	45.48	-5.51	2.78208	2.59e-05	0.00113	752.862	0	120.837	19.8404	31.7663	19.4872	12.0124	0	0.508503	25.4435	10.8454	2.28424	0	0	4.73205	0	0	0	0	0	0	0	NA
NonamEVm023328t1	32.99	-21.09	2.90463	4.04e-14	2.16e-11	187.574	120.953	96.1394	59.1131	0	13.1057	1.38859	0.554557	0	0	228.281	0	2.08232	0	0.480727	0	0	0	0	15.9999	0	0	NA
NonamEVm023349t1	214.21	-2.07	0.674047	0.000363	0.00741	1425.97	461.102	170.872	152.904	132.065	240.929	278.184	237.867	132.998	216.945	252.667	62.0951	18.4249	129.174	153.824	125.13	143.929	61.6456	104.262	98.5853	81.38	31.6091	NA
NonamEVm023387t1	11538.5	7.52	2.48511	8.62e-07	7.31e-05	0	0	41.9829	1297.75	263.358	0	890.918	560.506	1548.95	1323.66	1020.93	294.448	918.749	3970.99	695.086	3011.86	0	28655.4	1958.93	3910.19	203354	130.41	NA
NonamEVm023411t1	393.17	5.82	2.20426	3.1e-06	0.000215	2.64319	22.676	5.39448	12.9332	0.457933	0	2.85658	0	0	0	2.07511	1.66167	10.1721	0	0.317047	4626.29	38.856	2773.61	1132.8	16.996	0	0	NA
NonamEVm023445t1	520.14	8.31	2.55687	4.96e-07	4.78e-05	0	0	0	113.15	99.7984	0	462.827	546.405	525.016	266.667	1.59389	543.843	452.127	546.76	607.166	125.076	0	24.8898	839.749	3190.45	110.806	2986.79	NA
NonamEVm023465t1	2467.49	-7.52	1.55502	1e-09	1.99e-07	9473.93	10810.1	3569.92	7378.6	24.9894	1063.14	642.943	558.109	267.936	1278.99	16254.3	26.5416	39.3108	88.8598	436.777	0	3.41019	50.0158	39.3612	599.4	965.059	712.962	NA
NonamEVm023520t1	698.3	21.48	2.02764	3.59e-27	2.79e-23	0	0	0	96.7266	0	0	151.259	268.762	108.1	129.106	50.0678	211.214	175.029	290.919	278.829	308.419	0	0	1429.52	3205.51	1919.1	6740.1	NA
NonamEVm023602t1	110.01	-3.1	1.29586	0.000118	0.00347	792.855	206.744	37.6041	318.138	2.97514	66.9385	212.738	31.3026	35.9865	73.7239	362.763	13.7849	11.2638	29.7035	25.7428	0	0	13.0911	24.7539	95.1264	36.3381	28.729	NA
NonamEVm023629t1	10303.8	9.28	1.44742	3.72e-13	1.56e-10	24.8908	10.6191	59.4682	134.337	38.2621	7.92582	2.08082	15.275	112.634	0.648728	0	37.9768	30.7623	100.38	5.99196	11344.3	12746.2	40839.5	44701.4	69875.1	23970.6	22625.3	Cuticle protein CP575
NonamEVm023709t1	133.54	-2.6	0.862736	9.35e-05	0.00289	368.758	211.243	154.238	145.591	173.826	139.785	358.659	202.413	259.582	331.306	84.1035	69.6222	62.2909	98.1029	145.328	0	0	31.1626	37.2974	28.264	0	36.2587	NA
NonamEVm024166t1	193.37	-2.51	0.929433	0.000282	0.00626	143.865	427.638	760.988	319.195	79.7608	412.446	439.301	144.887	140.198	575.648	270.098	61.0388	64.442	79.113	77.2425	0	0	55.7039	68.5037	80.651	2.2587	51.13	NA
NonamEVm024180t1	40.35	-2.62	0.979101	0.000221	0.00537	120.783	96.5869	53.6429	47.1903	46.4868	103.191	44.8834	10.3055	36.4233	67.2185	51.8332	15.0986	31.0363	34.8741	21.7495	0	0	0	13.8284	8.71115	74.5284	9.37512	NA
NonamEVm024196t1	127.61	-2.49	0.857235	0.000182	0.00467	668.985	439.857	133.655	228.778	159.589	195.14	89.4742	51.9917	133.591	117.603	127.191	44.0928	81.094	113.284	61.8258	0	0	55.9344	75.3357	20.6744	0	9.34982	NA
NonamEVm024206t1	90.29	-6.39	1.90284	2.63e-07	2.85e-05	1252.82	91.9821	13.0792	313.337	4.62071	33.878	104.466	73.5317	22.7648	33.585	14.3483	10.3147	3.18585	0.580616	7.24531	0	0	0	3.45397	1.08744	0	2.075	NA
NonamEVm024207t1	25.52	-2.39	0.89081	0.000434	0.0083	124.584	24.767	20.3478	39.793	28.3431	27.9034	24.5583	12.2562	18.7194	18.0857	40.2585	15.6123	35.9567	22.0651	17.0492	0	0	0	10.3628	33.7131	29.4004	17.6383	NA
NonamEVm024481t1	100.88	-3.09	1.62195	0.000353	0.00724	24.9115	691.151	39.2269	92.0231	311.545	25.8827	284.692	54.4649	177.159	290.878	105.694	25.4095	0	12.7856	55.8754	0	0	0	12.4453	15.2399	0	0	NA
NonamEVm024604t1	29.88	-3.62	1.39184	2.12e-05	0.000951	42.4191	54.0797	48.9464	54.5176	33.567	46.9239	42.243	32.1335	42.106	50.0689	42.4565	12.7739	7.41124	24.006	22.2985	0	0	6.1043	0	14.2608	81.1023	0	NA
NonamEVm024727t1	40.94	17.07	2.18298	1.04e-15	8.08e-13	0	0	0	0	40.5996	0	91.3981	29.3826	179.345	79.3515	3.58265	61.861	52.314	210.548	73.6461	0	0	0	62.1048	0	0	16.5981	NA
NonamEVm024746t1	45.53	-3.26	1.43931	0.000112	0.00334	258.258	75.5217	4.36406	60.968	31.1283	25.9459	29.9884	24.5112	107.789	173.759	64.9802	2.78635	18.6512	84.1916	33.2482	0	0	0	5.52676	0	0	0	Metastasis-associated protein MTA1
NonamEVm024779t1	595.16	-2.25	0.566419	9.58e-06	0.000526	2211.03	1880.13	605.271	1272.98	284.662	590.784	691.381	531.577	497.647	782.793	509.964	282.777	506.683	471.71	309.758	97.7228	311.152	215.613	310.593	279.759	135.854	313.57	NA
NonamEVm024805t1	81.28	-4.17	2.10179	6.08e-05	0.00207	930.036	97.9502	24.7419	247.632	2.15718	0	144.554	107.776	22.2593	57.4567	5.57863	9.18276	0.454324	5.22213	15.3372	0	0	0	6.21371	5.43272	104.105	2.06984	NA
NonamEVm024854t1	903.55	-2.5	0.862423	0.000184	0.0047	6241.97	3412.77	412.177	1732.07	519.891	487.942	199.676	187.724	626.153	728.606	1652.99	87.9674	1358.08	418.567	396	281.796	106.577	299.583	465.583	129.364	38.4989	94.2101	NA
NonamEVm024935t1	25.22	-12.68	5.47335	1.11e-05	0.000595	0	4.69726	0	4.95154	0	0	0.414086	21.6145	0	0	472.775	7.02172	0	5.81819	37.5364	0	0	0	0	0	0	0	NA
NonamEVm024936t1	65.9	-3.25	1.57953	0.000188	0.00475	361.653	357.708	8.67693	111.639	4.92399	306.117	46.4799	12.2897	37.9555	41.4188	81.8084	5.33419	3.20747	25.0362	12.3819	0	0	0	12.4646	20.7316	0	0	NA
NonamEVm024943t1	106.41	-5.31	1.54775	2.11e-07	2.43e-05	849.284	684.876	109.925	194.764	17.8502	189.649	9.13089	9.3395	16.1944	46.5939	144.059	7.29795	10.5368	6.40414	4.26943	0	0	6.16645	11.0789	14.1835	0	9.42329	Solute carrier family 12 member 8
NonamEVm025184t1	27.6	-4.55	1.79857	8.27e-06	0.000466	127.175	64.5632	11.5167	43.3054	1.84385	13.7168	52.5458	8.86153	17.1997	28.5035	28.3439	14.9521	0.92072	10.4958	7.69071	0	0	0	0	19.6615	148.48	7.37836	NA
NonamEVm025194t1	40.76	-3.58	1.30753	1.52e-05	0.000768	274.534	113.916	43.0932	87.2535	22.5167	50.4006	26.0842	10.7279	40.2658	63.5025	28.4455	9.825	29.9105	29.7695	20.1171	0	0	0	8.52187	0	26.0739	11.6647	NA
NonamEVm025286t1	360.15	-2.9	0.899245	2.01e-05	0.000927	1552.35	1059.81	371.624	717.172	304.976	727.715	322.802	189.431	187.761	367.821	742.221	285.848	118.596	209.833	335.69	0	0	105.5	135.531	53.3524	90.4172	44.746	NA
NonamEVm025444t1	39.4	16.99	2.24294	6.8e-15	4.59e-12	0	0	0	0	4.55377	0	54.1586	55.3356	102.202	122.224	0	51.0877	98.9807	187.297	66.6038	0	0	0	61.3435	57.6157	0	5.30441	NA
NonamEVm025551t1	2799.18	19.68	4.83357	3.73e-07	3.74e-05	0	0	0	9.96362	0	0	0	0.986172	0	0	653.454	0	55574.9	0	0	1770.32	2857.67	669.318	38.8996	0	0	6.29501	NA
NonamEVm025563t1	113.85	-2.36	0.677347	4.66e-05	0.00169	358.635	347.467	134.732	151.494	139.809	184.216	123.819	107.611	112.884	154.641	182.774	56.6163	71.8249	120.471	85.3796	31.2386	0	49.4628	57.4564	13.0856	2.25821	18.8073	NA
NonamEVm025578t1	239.26	-2.84	0.970378	5.69e-05	0.00198	650.396	364.135	1266.26	417.454	173.097	349.418	195.831	91.3201	183.719	255.42	200.648	66.0178	119.638	184.338	161.277	0	0	6.19676	153.567	52.2914	277.916	94.8383	NA
NonamEVm025596t1	70.58	-2.42	0.827176	0.000212	0.00518	154.724	306.521	65.3384	146.674	63.7656	222.793	71.139	43.1748	59.712	67.8607	94.5063	22.6211	20.0598	90.0705	51.6012	0	0	37.2526	24.1961	5.44246	0	5.19948	NA
NonamEVm025642t1	38.06	-3.78	1.456	1.66e-05	0.000811	33.3542	245.162	38.4742	17.2063	49.1754	56.0857	140.519	7.86499	33.2621	121.181	41.783	6.51718	8.50109	21.489	13.1086	0	0	0	3.69466	0	0	0	NA
NonamEVm025741t1	313.11	20.01	3.8138	9.81e-09	1.58e-06	0	0	0	0	0	0	0	0	0	0	0	0	4511.43	0	0	534.071	1385.52	195.828	32.3333	124.106	97.521	7.54232	NA
NonamEVm025934t1	26.17	-2.89	1.08992	0.000103	0.00313	79.9791	68.3438	21.7638	67.0875	52.9629	37.7553	29.9367	7.35869	17.2002	26.4939	22.7245	29.3312	42.4091	30.7955	24.3038	0	0	0	4.83864	0	0	12.4844	NA
NonamEVm025953t1	7369.65	-10.02	2.34909	3.32e-08	4.9e-06	4351.02	2235.45	1433.53	9373.24	17.2505	32039.3	66630.1	12927.8	554.548	30619.5	1006.68	59.1669	0	54.6064	565.776	0	0	0	1.38224	4.3524	0	258.714	NA
NonamEVm025957t1	35.04	-2.4	0.923234	0.000508	0.00918	89.3881	79.7057	21.2339	53.3768	44.0262	159.699	40.1085	11.6453	51.2769	52.5175	51.3414	19.5515	31.196	25.4047	27.0668	0	0	0	11.3607	0.993613	0	0.948365	NA
NonamEVm026136t1	25.6	-2.88	1.47281	0.000496	0.00901	152.952	102.088	21.2431	39.5683	2.40727	168.149	7.05424	0.941342	5.86606	15.4784	32.9047	5.67304	0.984898	1.11491	2.44989	0	0	0	4.25579	0	0	0	NA
NonamEVm026141t1	130.83	-2.62	0.973282	0.000212	0.00518	474.519	334.024	105.583	208.334	38.7769	236.413	183.377	115.325	142.246	323.248	254.124	23.4758	53.1537	81.9842	58.7165	0	0	0	64.2931	13.082	90.2012	77.3234	NA
NonamEVm026177t1	21.87	-4.99	1.98303	6.43e-06	0.000393	195.188	95.9643	3.58006	18.3944	6.7987	111.424	8.51912	6.07727	3.16113	6.93102	14.155	1.85648	0	2.39934	2.81327	0	0	0	0	0	0	3.98762	NA
NonamEVm026217t1	40.22	-3.25	1.18558	3.14e-05	0.0013	285.169	168.982	24.5213	67.3104	33.1917	28.1526	25.8948	9.73179	24.2797	67.195	35.4998	11.0339	33.7568	21.7326	23.9158	0	0	0	14.4358	9.37117	0	0.771405	NA
NonamEVm026258t1	34.58	-3.07	1.35722	0.000171	0.0045	387.193	141.394	23.1892	89.4391	4.00475	27.7445	10.3914	4.42365	4.05099	9.0612	26.7461	1.12137	7.77903	0.582154	0.427029	0	0	18.5572	3.46226	1.09078	0	0	NA
NonamEVm026263t1	61.31	3.7	1.24058	5.1e-06	0.000329	0	11.8088	8.71441	8.71452	26.5521	39.7145	17.079	3.94131	22.331	20.7592	151.242	17.7049	9.17419	11.0868	26.5369	93.9565	89.1151	644.611	145.753	0	0	0	NA
NonamEVm026291t1	128.42	-3.06	1.06177	3.39e-05	0.00138	752.725	711.433	70.9986	188.766	67.0718	27.8882	162.301	116.935	77.1376	83.3172	96.7346	66.2149	73.7694	69.4483	97.1982	0	0	31.0882	53.8644	22.96	0	55.2902	NA
NonamEVm026294t1	71.11	-2.41	0.801287	0.000177	0.0046	307.419	150.865	24.289	85.0685	34.4886	116.191	35.7207	39.6335	66.5258	74.9563	71.413	21.5898	33.58	61.113	49.2856	22.7537	0	9.02321	30.7228	67.9094	180.965	80.9993	NA
NonamEVm026338t1	90.86	-19.33	3.64552	8.28e-09	1.35e-06	0	162.856	90.1481	165.491	62.8935	277.058	0	0	0	230.817	763.214	51.0897	0	0	195.4	0	0	0	0	0	0	0	NA
NonamEVm026346t1	56.03	-3.36	1.06394	6.11e-06	0.00038	526.879	215.859	47.9683	46.0174	14.1739	73.7495	26.2269	20.1044	34.4094	54.2679	34.6847	13.3855	17.3001	35.4277	16.6262	0	0	12.4423	22.1117	5.43877	0	15.5677	NA
NonamEVm026433t1	38.55	4.39	2.09793	3.68e-05	0.00146	1.7985	1.14177	0	2.53154	1.49879	11.765	7.7162	3.45343	2.54425	4.46264	7.82481	0.592314	10.9969	1.81827	0	0	420.372	61.3244	4.78604	64.3573	232.553	6.48781	NA
NonamEVm026485t1	25.56	7.94	5.82316	9.84e-05	0.00302	0	0	0	270.677	26.3332	0	2.05402	2.96217	0	0	241.963	4.55164	0	0	3.42193	0	0	6.0184	0	0	0	4.27515	NA
NonamEVm026557t1	25.72	-2.8	1.09947	0.000176	0.0046	123.021	88.7627	28.6526	14.8069	15.0965	33.3972	20.3405	3.46064	32.9406	33.6454	44.4674	7.31476	55.9991	25.6474	24.633	0	0	0	8.3292	4.34284	0	1.06187	NA
NonamEVm026589t1	58.34	-2.78	0.898761	4.26e-05	0.00161	407.226	129.335	49.0896	42.1401	68.9103	129.965	56.3834	25.0913	64.2737	71.2306	41.1181	17.4446	28.9283	40.2066	57.2415	0	0	18.4406	25.6392	7.64429	0	3.15093	NA
NonamEVm026649t1	49.31	-2.65	1.14649	0.000452	0.00851	24.8462	171.868	40.5539	37.2319	24.3106	118.874	48.5893	63.8046	91.0377	107.939	98.0752	24.0643	43.3908	70.3388	36.2486	0	0	0	8.29772	5.44568	0	69.8704	NA
NonamEVm026651t1	20.73	-3.41	2.04292	0.000324	0.00681	211.461	117.855	17.4036	55.9136	0.308063	3.96886	2.91057	3.43851	0	0.646918	36.3139	0.279973	2.28504	0	2.56104	0	0	0	0.692073	0	0	0	Nuclear pore complex protein Nup54
NonamEVm026983t1	91.19	-7.64	2.07206	9.86e-08	1.25e-05	436.439	599.321	52.104	107.99	2.77138	703.82	15.3657	7.37657	2.53167	5.17951	56.6935	2.52705	8.24897	2.32982	3.41716	0	0	0	0	0	0	0	NA
NonamEVm026995t1	30.05	-2.75	1.21682	0.000372	0.00756	49.6242	78.8068	26.0248	37.1991	22.4556	106.647	35.6777	11.7903	10.1162	54.3287	182.667	11.2198	4.57806	6.40038	17.0681	0	0	0	3.46016	0	0	3.13872	NA
NonamEVm027079t1	150.78	4.3	2.61642	0.000131	0.00377	0	0	0	0	345.828	0	172.672	213.653	662.991	120.087	0	192.829	78.2473	497.403	450.753	109.412	0	105.716	64.9109	158.706	85.9052	58.0727	Actin
NonamEVm027205t1	207.16	-3.11	1.60052	0.000307	0.00659	72.4791	1123.37	191.431	860.013	4.03814	243.377	109.737	37.4067	13.1981	170.167	1371.89	3.78134	1.93621	17.0571	27.9577	0	0	37.4529	0	69.6654	113.998	88.543	NA
NonamEVm027290t1	56.67	-3.47	1.40464	4.14e-05	0.00158	747.966	229.136	28.8245	101.562	7.38244	19.6217	6.6269	4.43421	5.56953	14.9115	29.9665	3.38737	2.30316	1.75066	2.56568	0	0	18.376	11.7952	0	0	10.5454	NA
NonamEVm027292t1	28.08	4.36	2.41689	8.24e-05	0.0026	0	0	1.73959	0	14.9908	3.43989	37.7206	0.429848	18.0624	38.278	6.2808	5.81204	30.7552	7.63663	7.30001	0	0	374.053	59.1982	5.72458	0	6.39105	NA
NonamEVm027371t1	31.05	-2.26	0.795008	0.000428	0.00825	204.128	80.0966	24.6189	44.703	32.65	17.8089	25.3435	20.1627	35.9563	36.9064	38.3326	15.7189	29.3211	15.7263	20.9317	0	0	18.5297	20.0903	2.18292	0	0	NA
NonamEVm027398t1	187.56	3.87	1.02813	1.67e-07	2e-05	28.4791	7.08138	39.2296	62.2167	21.2828	35.8069	17.9066	31.4594	22.2991	7.12181	86.2745	22.3992	4.11349	27.3634	25.2046	970.266	101.536	1204.55	618.479	225.766	67.889	499.575	NA
NonamEVm027570t1	37.94	-4.04	1.85978	4.16e-05	0.00158	375.541	197.575	17.1361	81.3053	5.21071	25.1159	4.11382	1.48134	3.0335	11.6804	97.0746	1.13744	0.927798	1.75435	2.13952	0	0	0	4.17066	0	0	5.33744	NA
NonamEVm027669t1	29.57	-2.65	1.12585	0.000413	0.00808	3.53266	44.5969	63.3525	29.6893	26.725	7.84417	57.9187	36.3972	113.248	83.4967	27.9248	40.8445	28.9594	27.3804	33.3001	0	0	0	2.77075	15.2796	0	7.36481	NA
NonamEVm027731t1	60.33	3.26	1.65242	0.000224	0.00541	1.91422	1.27059	6.24585	3.36277	0.888348	0	0.448115	0	0.914066	0.698912	7.88233	1.51619	25.918	4.40162	0.922189	0	0	557.501	160.021	83.8528	350.617	118.931	NA
NonamEVm027775t1	41.48	-2.75	1.295	0.000489	0.00893	103.065	17.6752	95.7311	116.78	5.23548	170.757	73.5888	29.4521	35.929	85.9865	14.757	44.464	20.9986	59.8831	17.0634	0	0	0	4.84127	16.3375	0	0	Cytochrome b
NonamEVm027787t1	41.23	-4.05	1.75829	2.83e-05	0.00121	425.516	209.833	39.5218	7.32727	0.450985	17.8454	17.0472	2.8275	21.2145	33.4439	26.3554	6.75677	9.35846	29.9594	0.312338	0	0	8.83109	2.98684	0.797466	45.0572	1.50911	NA
NonamEVm027842t1	85.9	-6.74	1.4216	1.25e-09	2.33e-07	144.231	188.757	66.8981	134.344	130.029	59.8586	217.36	110.275	265.612	237.651	33.8773	23.6788	88.6877	110.294	62.2191	0	0	0	0	11.9585	0	4.14581	NA
NonamEVm027867t1	26.17	-2.77	1.05466	0.000161	0.00432	68.2918	39.0978	15.1518	50.5864	31.0102	20.0179	68.4095	28.1667	36.546	111.192	26.1535	9.45069	12.6707	30.6096	18.0995	0	0	0	3.46172	4.68796	0	2.20161	NA
NonamEVm027927t1	437.56	-4.43	1.66259	5.86e-06	0.000368	1393.37	1662.72	401.18	1852.65	102.742	2046.45	514.779	69.5178	92.2475	361.013	261	378.119	49.5922	38.2098	282.361	0	0	41.8849	16.7696	0	0	61.708	NA
NonamEVm028008t1	182.06	-3.07	1.10373	4.57e-05	0.00167	556.625	1062.21	246.669	579.467	94.0142	303.34	141.599	58.7787	93.1753	212.377	303.955	60.7772	6.48742	40.3648	79.6589	15.5578	0	18.2147	67.4562	21.9231	0	42.5656	NA
NonamEVm028076t1	1492.22	2.79	0.832682	1.86e-05	0.000889	417.519	627.265	277.655	243.082	356.918	244.23	339.279	417.285	259.864	352.907	393.678	246.438	560.967	230.812	403.777	1959.41	20118.5	682.586	686.382	1967.62	632.071	1410.63	Migration and invasion enhancer 1
NonamEVm028094t1	31.65	-2.64	1.12027	0.000427	0.00822	23.0291	92.9262	56.3411	38.4387	5.53944	132.039	38.1597	18.6986	41.5122	152.852	30.7462	12.9419	8.72399	21.5636	8.97264	0	0	6.15172	3.46541	0	0	4.20057	NA
NonamEVm028187t1	133.98	6.85	2.17694	5.49e-07	5.19e-05	0	0	1.45054	1.24307	0	0	1.66382	15.7346	1.51992	1.94252	1.19815	21.0285	15.5604	4.65902	14.0982	0	164.008	390.12	160.021	1132.62	36.1699	984.433	Actin
NonamEVm028280t1	31.19	-3.22	1.68972	0.000276	0.00619	203.047	15.339	16.0029	125.659	1.2326	7.98618	169.926	46.5521	17.2013	36.8055	0.398527	5.56889	5.90987	3.48236	19.175	0	0	0	1.38115	2.17379	0	8.28643	NA
NonamEVm028406t1	919.23	-4.74	1.67559	2.56e-06	0.000184	2663.76	2537.76	3496.52	1864.92	12.9152	800.189	317.425	106.332	26.331	249.345	6393.48	50.16	18.3131	55.7566	132.356	0	3.24183	103.073	26.0861	283.46	722.405	359.272	NA
NonamEVm028410t1	387.49	-10.17	1.80604	7.85e-11	2.1e-08	1225.41	864.245	1872.79	688.941	2.28852	321.292	250.164	68.4797	68.5973	210.683	2379.55	16.032	1.06803	28.8075	3.39904	0	0	0	0	9.90026	161.59	351.547	NA
NonamEVm028419t1	158.46	-4.28	1.34761	1.03e-06	8.35e-05	1460.75	341.987	174.493	520.784	18.4255	324.979	196.981	24.249	58.259	171.026	68.8538	11.1172	6.51021	37.5073	17.1529	0	0	36.2478	14.6291	0	0	2.14089	NA
NonamEVm028422t1	547.8	-4.63	1.81097	7.13e-06	0.000422	1707.54	2655.78	1319.24	1284	4.3166	128.382	112.172	116.674	38.1378	228.397	3512.96	6.5741	19.5841	12.348	119.623	0	66.9349	0	5.59155	250.149	376.333	86.8774	NA
NonamEVm028572t1	10607.2	-4.43	1.51808	2.33e-06	0.00017	18267.7	6750.94	6337.89	111733	98.0981	8318.79	18588.3	2488.65	445.259	13161.7	1801.13	258.436	48.1496	72.019	414.208	65.6671	471.955	82.2558	32.3117	5583.31	9354.26	28984.3	NA
NonamEVm028808t1	414.82	-2.63	1.05376	0.000326	0.00686	5315.33	1149.01	334.269	618.197	33.0547	155.079	19.3953	16.5701	25.0505	65.8309	624.833	11.3331	14.2212	8.31984	22.5729	140.607	55.3382	119.815	204.817	30.116	114.951	47.3586	NA
NonamEVm028843t1	20.02	-2.84	1.36329	0.000418	0.00814	133.066	75.8995	62.6405	20.9152	7.96526	57.607	2.87389	3.46462	7.08202	7.1486	49.1943	0.571164	2.79433	0	0.428602	0	0	0	5.57251	0	0	3.22551	NA
NonamEVm028905t1	55.05	-3.12	1.62595	0.000323	0.00681	409.772	372.336	15.8277	155.979	2.15336	105.591	13.6564	1.97416	6.0798	12.3354	97.5924	1.98269	1.8487	0	0.856327	0	0	0	13.2038	0	0	0	NA
NonamEVm029093t1	44.1	16.91	2.11307	2.39e-16	2.32e-13	0	0	0	1.24082	37.824	0	73.9207	89.6334	114.168	52.2613	0	85.0409	71.0061	303.406	57.8999	0	0	0	53.1418	10.8668	0	19.7269	NA
NonamEVm029104t1	90.5	-2.51	0.774988	6.43e-05	0.00217	346.976	262.984	78.458	144.237	116.46	141.404	63.2602	68.6647	142.699	147.321	123.201	39.0642	53.7519	85.9749	74.1887	0	0	49.7288	32.4828	9.79249	0	10.3868	NA
NonamEVm029237t1	32.56	-2.57	0.981923	0.00029	0.00638	173.798	53.1244	21.5196	54.0054	28.6004	35.1615	61.5318	38.5584	25.4784	37.5823	18.9947	32.2835	29.321	29.5363	17.9074	0	0	0	12.721	28.1239	0	18.1798	NA
NonamEVm029386t1	79.26	-2.66	1.02453	0.00023	0.00552	260.254	175.906	77.1807	108.304	88.779	91.9916	151.702	51.9303	139.655	160.119	68.946	39.782	109.467	118.373	58.7991	0	0	0	28.3088	14.1251	0	0	NA
NonamEVm029568t1	177.42	-2.26	0.598333	2.01e-05	0.000927	917.234	488.717	141.061	270.09	144.955	187.353	136.225	68.2539	153.492	253.578	153.275	74.04	122.696	165.753	120.373	140.865	61.3745	43.5461	79.571	52.2887	70.1713	58.247	NA
NonamEVm029581t1	514.73	3.96	1.97504	7.26e-05	0.00238	19.5729	9.43375	0	247.426	154.645	7.968	151.901	253.991	933.459	1171.19	39.0655	177.386	713.05	990.191	665.415	0	0	2120.11	1793.01	1257.43	0	618.725	NA
NonamEVm029624t1	102.28	2.44	0.929015	0.000414	0.00808	35.057	24.6679	45.4051	39.5688	15.1147	7.52641	28.3209	10.1405	17.9484	33.8368	41.9269	16.7982	25.9637	14.3914	16.6095	1502.26	155.151	23.7062	118.124	28.1479	0	49.5493	NA
NonamEVm029763t1	139.11	5.56	4.41418	0.000187	0.00475	0	0	0	1.25301	0	0	0	1.50376	0	0	0	0	0	0	0	142.008	65.4477	2577.7	270.287	0	0	2.16177	NA
NonamEVm029789t1	189.61	4.89	2.85739	7.33e-05	0.00239	0	0	1.46788	33.14	56.1327	0	386.051	133.722	494.517	521.521	0.396794	130.212	294.16	722.752	233.224	0	0	489.763	219.975	378.584	0	75.7742	NA
NonamEVm029827t1	52.35	3.51	2.28792	0.000362	0.00741	0	1.18279	1.44838	2.49312	0	5.9014	1.66667	0	0	0.654177	0.805914	0	4.6599	8.24669	0	439.403	93.605	79.8414	0	16.5541	494.103	1.06859	Transposase for transposon Tn5
NonamEVm029973t1	40.95	-3.07	1.38809	0.00019	0.00478	415.774	179.098	21.7543	38.51	5.85125	25.8063	24.112	3.43629	13.1572	29.0944	69.7983	4.75479	11.8706	12.7913	10.2384	0	0	0	15.2162	19.6065	0	0	NA
NonamEVm029987t1	2029.87	6.04	2.5351	6.64e-06	0.000401	0	36.5281	0	649.739	93.6144	5.95887	191.667	185.001	291.432	955.947	0	117.108	407.429	1060.71	225.181	1312.43	0	14854.5	313.902	2799.29	20749.6	407.058	NA
NonamEVm030041t1	57.85	-3.18	0.907155	3.21e-06	0.00022	396.228	193.049	78.9024	86.9535	36.0451	63.9245	74.9593	41.3974	36.983	47.7077	48.5563	27.1934	20.292	27.7416	19.3848	0	0	23.5782	18.932	4.43257	0	26.4152	NA
NonamEVm030180t1	387.91	-2.56	0.877626	0.000143	0.00397	1437.94	1578.86	279.24	1213.4	160.896	984.25	512.867	215.083	190.912	455.524	327.064	202.343	115.966	168.171	206.054	140.568	154.403	12.0417	53.4915	24.4383	0	100.401	NA
NonamEVm030324t1	322.94	-4.95	2.30076	2.03e-05	0.000927	566.916	3016.43	414.627	1045.44	7.38745	1081.78	95.8255	0.984491	3.54461	14.2537	263.219	4.2225	0.459403	31.4827	2.99186	0	0	18.4527	8.31982	0	42.8477	485.465	NA
NonamEVm030341t1	95.43	-3.99	1.80828	4.07e-05	0.00158	1025.19	425.537	69.3182	117.722	14.7604	246.364	9.9491	1.96594	11.633	21.9967	110.493	1.68528	4.12568	0.582121	3.41448	0	0	0	17.9998	0	0	16.771	NA
NonamEVm030377t1	93.94	-3.04	1.15295	7.26e-05	0.00238	856.755	395.537	66.5666	261.852	20.0108	75.1206	28.6492	11.3072	29.8658	35.5986	130.119	17.121	20.1563	23.2909	22.205	0	0	49.3651	20.0836	0	0	3.14054	NA
NonamEVm030790t1	346.39	-6.62	2.12123	5.96e-07	5.51e-05	3356.68	2658.42	233.308	427.345	7.07856	105.738	2.07061	2.46772	5.06803	17.5312	631.676	7.07821	0	2.9228	7.70794	0	0	12.2261	12.5095	40.5186	38.2867	51.8719	NA
NonamEVm030817t1	41.77	-2.85	1.09777	0.000132	0.00378	269.445	113.04	57.811	104.261	28.0416	128.038	33.6263	17.7518	17.2395	49.3205	40.8026	8.18392	0	10.5126	10.2736	0	0	24.596	4.86134	1.09432	0	0	NA
NonamEVm030969t1	169.38	-3.73	1.1501	1.92e-06	0.000144	248.325	351.473	259.543	451.932	194.827	525.378	529.17	104.999	93.8863	198.118	154.266	229.984	88.0552	59.2828	194.82	0	0	0	23.9652	1.11997	0	17.1253	NA
NonamEVm031028t1	50.28	10.69	8.25751	7.58e-05	0.00245	0	0	0	0	0	0	0	0	0	0	0	0	587.671	0	0	0	448.921	61.2597	1.45588	6.90159	0	0	NA
NonamEVm031091t1	42.25	-2.71	0.867295	4.87e-05	0.00175	197.023	178.363	46.9293	63.0412	31.822	58.3349	38.7897	19.83	39.0077	35.0322	27.8046	24.1197	36.4122	29.8798	37.3056	0	0	10.3379	21.368	24.6093	0	9.43721	NA
NonamEVm031165t1	29.48	-2.31	0.823616	0.000403	0.00797	99.994	72.5075	48.5102	49.2884	23.0063	69.3518	26.3237	22.775	43.5436	49.4213	19.212	16.5588	18.6254	42.7956	6.86165	0	0	18.0538	9.7558	3.29748	0	8.58959	NA
NonamEVm031382t1	139.64	-2.5	0.841539	0.000149	0.00407	729.128	306.968	129.618	206.662	106.662	222.017	249.658	48.9898	131.056	235.011	124.342	109.321	107.187	96.9016	86.0678	46.9556	0	18.7274	71.116	24.9898	0	20.6874	NA
NonamEVm031420t1	59.08	2.49	0.983524	0.000447	0.00847	7.11103	16.515	8.70268	27.3593	115.675	29.732	69.9039	76.8188	86.2138	121.891	14.7944	25.8548	19.2652	10.4982	28.66	0	458.019	136.115	15.9551	8.74315	0	22.0073	NA
NonamEVm031428t1	33.22	4.9	3.15988	0.000113	0.00334	0	0	0	3.72298	6.77213	0	2.90652	0	12.1463	0	2.39418	9.81685	25.6365	9.31285	0.853778	561.988	0	24.6937	0.692294	0	69.9611	0	NA
NonamEVm031434t1	30.95	-3.35	1.58714	0.000139	0.0039	111.875	187.294	55.0681	69.5448	6.77481	110.994	7.06445	10.3156	8.09835	15.5249	79.0008	1.40049	8.2296	0	1.2804	0	0	0	4.15231	4.36033	0	0	NA
NonamEVm031497t1	176.99	2.36	0.863538	0.000419	0.00814	22.9939	79.7314	21.6609	100.223	158.275	110.936	186.844	71.7305	123.717	280.898	111.047	28.054	377.401	80.6533	115.791	317.039	357.006	839.788	257.15	101.764	0	151.029	NA
NonamEVm031535t1	57.09	-2.28	0.840983	0.000544	0.00959	320.349	108.509	34.879	72.128	73.0228	113.573	59.94	20.1064	60.2168	85.93	59.8035	25.6622	36.4303	56.9223	40.9286	0	0	31.0945	25.5688	18.4941	0	12.4585	NA
NonamEVm031712t1	65.1	3.24	1.98764	0.000443	0.0084	0	0	0	13.6852	9.55189	0	106.619	92.5959	186.663	72.9528	0	88.7944	70.4411	413.739	85.6343	15.6423	0	37.3948	53.855	83.673	79.193	21.743	NA
NonamEVm031779t1	20.3	-2.47	0.98981	0.000525	0.00934	75.341	72.9342	20.5262	38.0125	25.0717	35.3471	9.66232	7.01856	12.2326	17.7119	24.1184	10.3738	3.93593	5.27543	19.5899	0	0	0	8.07044	14.0549	41.8487	5.51221	NA
NonamEVm031859t1	20.64	3.6	2.24092	0.000282	0.00626	0	0	0	0	1.2526	0	0.843077	13.5491	33.7323	0	11.7994	14.4207	144.881	30.5704	41.3002	0	0	143.278	18.3707	0	0	0	NA
NonamEVm031896t1	80.75	-3.11	1.25394	8.9e-05	0.00278	521.945	257.43	40.3855	226.744	40.6106	76.6319	93.6499	13.7903	63.2883	123.145	67.5128	15.2277	145.416	33.25	30.3534	0	0	0	27.0512	0	0	0	NA
NonamEVm032391t1	310.24	-3.23	1.22825	4.58e-05	0.00168	3121.01	2016.87	373.32	309.12	12.2963	208.461	7.0245	7.4085	15.7031	46.1152	178.403	12.7718	14.8199	4.67959	12.4212	46.7042	0	97.3274	106.394	80.0083	85.4325	69.0834	NA
NonamEVm032494t1	26.71	-3.07	1.464	0.000243	0.00572	0	28.202	160.151	22.2963	13.2213	66.8931	93.6383	17.7049	17.1988	83.4998	37.11	15.7532	8.72263	6.98979	9.82086	0	0	0	2.07804	4.36633	0	0	NA
NonamEVm032581t1	23.46	-2.81	1.26081	0.000347	0.00715	8.88511	48.3165	46.4138	21.1215	6.46828	79.4059	53.2199	22.5868	32.8993	122.224	8.37757	17.6263	12.3311	22.0994	12.8008	0	0	0	1.38362	0	0	0	NA
NonamEVm032662t1	79.78	-2.69	0.82503	3.4e-05	0.00138	404.301	220.656	66.9155	115.71	68.7248	97.8018	114.535	39.2135	97.1543	122.071	67.7647	50.1457	55.4895	79.5377	69.4735	0	0	24.9181	37.3016	14.1343	0	9.3281	NA
NonamEVm032872t1	38.35	2.11	0.716326	0.000475	0.00875	17.3771	22.3224	8.37272	17.1919	13.8626	9.97438	15.407	13.1261	42.0774	28.0051	43.2995	31.4458	34.6544	20.0439	39.3075	0	107.022	224.037	99.8403	3.64715	39.4716	13.138	NA
NonamEVm033129t1	59.22	-2.69	1.01077	0.00018	0.00465	221.986	194.317	36.2382	101.813	79.7217	63.4885	95.5675	44.1596	71.317	176.42	59.0005	20.1287	9.12706	46.4916	38.3753	0	0	0	24.1959	15.2422	0	5.20775	NA
NonamEVm033195t1	31.3	-4.15	1.3985	2.67e-06	0.000191	137.064	132.112	10.1755	32.3371	19.4122	31.8938	60.3648	27.4591	50.6019	73.648	35.083	9.48085	20.0306	19.7462	18.7575	0	0	0	2.76391	7.61407	0	0	NA
NonamEVm033528t1	27.86	12.51	8.21045	4.15e-05	0.00158	0	0	0	0	0	0	0	0	0	0	0.402344	0	0	0	0	0	0	531.402	81.1541	0	0	0	NA
NonamEVm033629t1	1717.78	-2.71	0.816541	2.72e-05	0.00117	6902.95	4769.14	3818.88	4697.86	244.687	8335.37	933.967	237.348	412.683	915.115	1627.61	282.472	168.554	350.077	401.458	500.523	172.274	530.251	472.607	424.971	1123.52	468.751	NA
NonamEVm033635t1	25.88	-4.81	2.18444	1.93e-05	0.00091	313.95	37.6937	8.6782	103.06	2.77389	5.91732	31.981	31.0559	12.1692	12.3274	5.19966	3.38336	0	1.16769	0	0	0	0	0	0	0	0	NA
NonamEVm033799t1	49.83	-3.33	1.14431	1.52e-05	0.000768	282.722	268.729	37.7464	47.2228	62.2064	57.6913	24.9557	15.6924	33.386	62.6628	47.4333	25.3968	27.7919	26.1371	37.9383	0	0	0	18.657	2.17589	0	17.6645	NA
NonamEVm033830t1	466.69	-4.49	1.28159	2.19e-07	2.46e-05	4831.05	1590.49	679.146	1089.82	111.256	113.702	95.7809	53.9348	131.578	140.836	761.097	47.9466	71.4512	126.021	70.768	46.9292	0	43.5811	94.6613	59.8196	81.4528	25.932	NA
NonamEVm033981t1	701.75	8.05	1.65017	9.55e-10	1.92e-07	21.0364	3.51609	0	67.9003	7.69678	0	6.98939	11.0174	5.09664	1.9694	8.06969	4.9282	179.259	5.92686	9.08997	4811.7	9732.13	220.709	214.109	27.8105	83.1124	16.4938	NA
NonamEVm034338t1	41.99	-2.41	0.895469	0.000407	0.008	154.299	74.1549	8.68104	70.7289	73.8798	45.455	20.7576	36.8718	68.8397	58.899	57.4742	19.6493	84.2993	57.0633	39.7123	0	0	6.16892	13.1582	5.45591	13.5393	14.6584	NA
NonamEVm034425t1	52.99	-3.31	1.15087	1.76e-05	0.000847	312.698	118.98	37.7087	160.22	42.7923	69.5074	74.8188	29.4339	64.2384	98.2147	28.303	9.77878	22.3482	41.2531	23.4492	0	0	0	13.824	11.9729	0	6.244	NA
NonamEVm034551t1	4812.52	-13.16	2.16986	6.56e-11	1.79e-08	38246.2	18790.9	7701.64	27373.7	267.29	8048.65	16.3401	5.5193	0	5.91592	2235.98	5.82653	0	0	12.9953	0	0	5.90335	0.705202	825.923	158.893	2173.05	NA
NonamEVm034575t1	21.25	-2.87	1.24954	0.000254	0.0059	163.484	22.1076	25.3909	63.7252	10.6971	37.6905	10.1943	9.96813	7.59865	8.49092	43.3269	2.02251	1.41403	12.3866	3.87521	0	0	5.90463	2.80346	17.7181	0	18.6691	NA
NonamEVm034833t1	71.56	5.82	1.76283	3.27e-07	3.41e-05	3.56368	0	4.35374	1.24919	2.48396	5.91195	0	0	1.53454	0	0	1.14516	3.27015	0	1.72961	660.506	586.883	270.718	30.884	0	0	0	NA
NonamEVm034845t1	20.52	-3.27	2.10614	0.000483	0.00885	283.935	95.8496	3.84551	49.5825	0.546108	0	2.20816	0	1.34751	1.14929	9.30332	0	0	0	0	0	0	0	0.61493	0	0	2.97834	NA
NonamEVm035147t1	61.54	-2.58	1.01066	0.000329	0.00689	238.669	184.096	72.7327	130.653	50.5502	51.8838	126.206	30.891	80.9801	111.771	41.8657	28.1523	55.9733	53.4301	41.3551	0	0	6.22824	25.5667	22.8406	0	0	NA
NonamEVm035781t1	47.86	-2.72	0.936163	8.7e-05	0.00273	206.199	76.6081	36.2769	74.5566	33.2642	81.4686	59.8842	33.8631	88.5571	138.982	41.476	24.3162	17.7939	40.1079	36.2553	0	0	12.4041	11.0639	28.3113	0	11.4512	NA
NonamEVm035841t1	40.67	-2.88	1.01926	6.81e-05	0.00227	156.692	136.856	36.3549	57.2231	45.2992	73.8059	50.3853	23.0416	69.324	62.6572	27.5062	17.5586	38.6767	46.4528	31.5431	0	0	0	13.8173	7.61229	0	0	NA
NonamEVm035937t1	1597.51	7.46	4.77582	6.06e-05	0.00207	5.34622	0	0	27.5362	0	0	0	0	0	0	0	0	0	0	0	16254	6907.8	7670.08	4240.59	30.1358	0	9.80905	NA
NonamEVm036225t1	235.42	-3.95	1.61343	2.03e-05	0.000927	40.6377	766.848	61.9169	599.083	256.413	156.763	223.498	148.778	173.102	158.167	1688.07	201.048	29.4898	367.021	291.145	0	0	0	11.7936	5.4652	0	0	NA
NonamEVm036333t1	21.62	-3.88	1.4865	1.33e-05	0.00069	99.1886	122.308	17.3341	44.6296	9.53766	19.7091	14.9294	7.37789	10.6278	26.5445	40.714	8.43522	4.5888	18.0593	20.9283	0	0	0	2.07841	8.73448	0	0	NA
NonamEVm036415t1	84.17	-2.32	0.824047	0.000373	0.00757	399.386	182.536	56.4877	139.051	73.5894	128.712	91.3928	38.3247	71.8731	115.163	102.152	32.7936	89.6689	78.5629	67.0173	0	0	12.3618	58.1446	68.6962	27.0937	18.8089	NA
NonamEVm036483t1	40.08	-14.78	3.24907	9.61e-08	1.24e-05	0	0	1.45058	0	37.2389	0	375.726	78.4282	124.875	50.3647	0	98.4959	1.822	8.128	105.238	0	0	0	0	0	0	0	NA
NonamEVm036552t1	31.58	3.45	2.13674	0.000341	0.00706	0	0	1.38369	0	0	0	2.79883	3.47477	2.0042	1.29942	0	17.6214	7.07122	5.87167	15.3969	199.159	0	5.78289	70.9396	196.01	0	165.87	NA
NonamEVm036806t1	119.44	-4.13	2.11226	6.95e-05	0.0023	93.0268	143.618	52.7169	599.602	25.4758	213.57	61.0063	225.355	90.6007	7.10372	625.032	25.7735	0	80.171	383.644	0	0	0	0	0	0	1.03168	NA
NonamEVm036974t1	53.7	-2.77	1.08118	0.000186	0.00475	347.929	173.664	79.6958	91.3021	28.446	157.764	40.8424	15.4246	13.0221	55.9243	35.9459	14.9042	7.36348	25.4802	37.0969	0	0	0	29.5863	20.7356	0	6.24408	NA
NonamEVm036993t1	195.2	3.75	1.27397	5.34e-06	0.000341	23.0331	25.9108	2.88758	24.8273	87.5787	0	184.286	68.2103	92.9134	250.378	118.615	25.2225	355.618	37.4678	88.3554	999.938	105.321	815.518	645.911	155.728	22.5705	164.182	NA
NonamEVm037167t1	56.49	-3.67	1.24426	6.14e-06	0.00038	488.159	219	24.6278	96.823	33.8567	55.4903	36.969	12.7628	51.0913	47.1905	49.0457	13.1527	26.0372	45.9305	22.6057	0	0	0	17.9811	0	0	2.08584	NA
NonamEVm037648t1	1318.19	5.36	5.66653	0.00042	0.00814	0	0	0	18.8607	0	0	0	0	0	0	0	0	0	0	0	12729.5	2461.53	11289.6	2497.44	0	0	3.24855	NA
NonamEVm038361t1	55.46	-2.72	1.01921	0.000166	0.00443	55.4608	75.5813	30.1827	89.0174	41.1133	212.381	118.476	107.807	87.777	93.1366	88.2501	30.9862	44.1095	54.699	24.6669	0	0	0	5.79111	16.184	0	44.495	NA
NonamEVm038524t1	175.08	-2.59	0.847716	8.71e-05	0.00273	874.484	339.837	177.465	197.829	185.532	662.581	179.508	70.5915	144.728	156.962	147.499	91.3929	91.437	157.35	158.992	0	0	49.8306	88.427	21.7475	45.2562	10.3668	NA
NonamEVm039073t1	44.02	5.49	2.95911	3.75e-05	0.00148	0	0	1.43921	0	3.68751	0	0	1.96952	0	2.59153	0	0	0	0	0.854601	622.813	0	238.458	78.3515	7.64721	0	10.5457	NA
NonamEVm039091t1	30.1	-3.04	1.13629	6.59e-05	0.00221	43.1794	97.1452	60.3086	76.2925	17.1364	31.0674	26.1293	25.5827	21.6144	25.253	48.927	79.2851	27.9098	10.2803	52.7522	0	0	0	5.14743	12.1676	0	1.95104	NA
NonamEVm039932t1	2269.88	-3.53	1.08507	2.85e-06	0.000203	11038	4829.47	5959.85	4946.31	281.634	1186.83	3731.66	1160.79	616.272	2342.54	8142.54	186.709	9.65408	181.163	648.918	197.458	343.22	420.148	125.763	791.653	1755.55	1041.21	NA
NonamEVm040186t1	73.46	-2.71	1.25351	0.000518	0.00928	826.106	263.369	76.4068	156.147	13.5441	119.671	9.94513	0.986487	11.1487	7.7882	43.9928	7.91619	1.8454	10.5158	3.85242	0	0	18.3731	34.7296	9.8494	0	0	NA
NonamEVm040842t1	60.68	-3.57	1.08741	2.34e-06	0.00017	140.243	102.433	34.7725	80.6847	54.7816	93.1737	184.847	127.103	88.0053	74.3239	111.627	60.9768	42.0052	63.9365	43.9221	0	0	0	6.22266	18.5124	0	7.29605	NA
NonamEVm042291t1	1448.62	-2.57	1.11127	0.000549	0.00967	15612.3	7670.99	843.449	1916.52	36.4496	346.614	55.7964	37.5328	56.6805	131.987	2104.11	25.1636	21.6984	49.7655	20.3541	249.951	1040.63	186.61	221.813	270.071	390.043	581.105	NA
NonamEVm042533t1	134.41	-2.78	1.0109	0.000114	0.00337	928.959	270.965	92.775	249.652	78.5303	142.79	181.215	88.4023	147.283	276.821	89.7651	20.9974	31.9893	112.266	47.3686	0	0	92.8524	7.61126	18.527	67.7635	10.4332	NA
NonamEVm042535t1	58.83	-2.74	1.25467	0.000451	0.00851	394.591	391.392	14.5063	84.5159	7.39586	198.47	17.0523	7.86263	13.674	42.7131	29.1417	19.6079	0.457234	18.0431	14.9451	0	0	30.9744	9.0005	0	0	0	NA
NonamEVm043137t1	67.46	19.59	2.6713	3.15e-14	1.81e-11	0	0	0	0	6.15085	5.9347	1.24485	0	1.51661	5.16936	198.871	3.91863	662.46	2.32483	0.852659	0	0	524.857	60.1452	3.26704	0	7.30408	NA
NonamEVm043697t1	57.87	4.78	2.4068	3.67e-05	0.00146	0	0	0	14.8277	10.4354	1.95603	66.1071	66.3949	92.9724	53.065	4.78527	68.2215	141.226	315.727	72.9836	0	0	36.6378	173.145	116.759	0	37.9244	NA
NonamEVm044592t1	34.76	4.33	2.08768	4.11e-05	0.00158	0	2.33477	1.42284	0	4.59463	3.83629	6.56594	1.98032	14.1646	15.5995	1.6	2.57175	32.1529	5.27529	7.28756	0	0	473.486	185.334	0	0	6.45797	NA
NonamEVm044792t1	44.21	16.79	2.1361	7.7e-16	6.64e-13	0	0	0	0	11.862	0	267.303	68.0505	56.4651	45.5224	1.54955	51.2217	29.1713	249.075	98.6541	0	0	35.2949	18.1864	1.196	0	39.1596	NA
NonamEVm044819t1	119.36	-4.29	1.15193	1.01e-07	1.27e-05	913.811	519.972	80.1569	179.55	36.5689	287.454	56.8417	60.8163	35.1852	127.323	84.7113	29.7517	8.24985	26.6382	28.9137	24.9434	0	4.88989	22.3054	12.2637	63.0533	22.4134	NA
NonamEVm044852t1	113.52	-2.24	0.690146	0.000141	0.00393	240.941	254.439	118.719	120.004	105.92	133.87	263.756	153.493	164.512	256.716	95.5703	66.3413	65.3881	150.215	86.692	0	0	57.5975	43.0124	39.6793	46.4571	34.0899	NA
NonamEVm045399t1	21.54	-3.8	2.03019	0.000125	0.00363	290.321	22.4156	8.59608	50.4713	0	1.68186	36.9501	31.1398	9.75353	16.4071	2.36192	0.472835	0	0.983531	1.80434	0	0	0	0.585021	0	0	0	NA
NonamEVm046674t1	61.13	2.97	1.53171	0.000411	0.00806	0	8.02459	3.17866	6.29959	35.294	0	101.762	22.5424	6.0494	118.107	50.302	6.56698	184.827	12.7696	38.7759	279.819	0	178.44	243.302	16.326	0	32.5715	NA
NonamEVm047866t1	35.35	-2.35	0.806884	0.000277	0.00619	194.391	64.5451	35.6446	73.7061	28.4093	83.1171	41.4542	23.0847	34.7422	56.8311	29.0305	24.8542	20.7366	16.8695	10.2206	0	0	12.0713	19.3624	4.36	0	4.23334	NA
NonamEVm048090t1	25293.4	10.91	2.2116	4.06e-09	7.16e-07	58.7218	39.0171	26.1092	113.409	0.928416	3.95105	0	0	0	0	23.3105	0	182.007	0	0.860228	62419.8	129364	160731	201916	874.144	475.867	225.787	NA

## Sheet: S1vS6
transcript_id	baseMean	log2FoldChange	lfcSE	pvalue	padj	S1_1	S1_2	S1_4	S2_1	S2_2	S2_3	S2_4	S3_1	S3_2	S3_3	S3_4	S4_1	S4_2	S4_3	S4_4	S5_1	S5_2	S5_3	S5_4	S6_1	S6_2	S6_4	gene_name
NonamEVm000002t1	76285	4.53	1.33688	4.01e-05	0.00074	38.5944	173.281	5899.72	10857.1	764.948	59.022	15040.7	16191.5	11513.2	14645.8	1168.9	9927.06	14936.1	34936.7	12048	870548	15502.1	172823	25818.2	64240.1	353574	27564.8	Twitchin
NonamEVm000010t1	275.61	-3.19	1.04729	0.000665	0.00563	104.924	210.795	622.367	223.958	478.794	408.813	725.986	321.25	322.95	319.945	158.565	566.775	468.802	414.811	329.074	0	0	105.908	218.92	43.3301	0	17.5232	Dynein heavy chain, cytoplasmic
NonamEVm000011t1	407.51	-4.01	1.02569	1.32e-05	0.000341	250.8	350.367	462.076	814.855	434.096	1733.05	1617.43	150.262	177.857	829.284	312.319	497.869	366.093	116.286	191.326	220.373	0	268.814	136.325	9.82994	0	25.9823	Low-density lipoprotein receptor-related protein 2
NonamEVm000020t1	371.03	-3.18	1.10436	0.00114	0.0083	145.555	753.084	433.435	611.066	268.55	482.173	709.396	447.8	709.23	1124.17	412.737	254.814	32.3841	774.232	479.077	330.411	0	27.1678	85.2308	28.0335	0	54.2235	Hemicentin-1
NonamEVm000034t1	209.69	-2.9	0.9046	0.000521	0.00476	676.346	365.773	256.117	340.187	289.585	244.358	629.33	177.773	236.794	274.022	148.402	87.2848	122.433	183.9	123.271	0	0	262.478	68.5574	28.0489	69.7078	28.7505	NA
NonamEVm000039t1	86.66	-3	0.993211	0.000887	0.0069	49.2324	91.2771	115.567	85.9122	81.4642	98.7196	215.766	58.9371	151.276	176.486	74.091	52.0239	51.616	89.5307	39.2834	224.08	0	179.74	49.2671	19.5437	0	2.8105	Ectopic P granules protein 5 homolog
NonamEVm000050t1	294.51	-4.57	1.63567	0.000178	0.0022	25.341	70.4591	19.1518	303.409	16.6733	329.733	2873.27	208.441	200.438	1724.82	12.5498	144.827	14.4011	88.5608	444.642	0	0	0	2.45353	0	0	0	Fatty acid synthase
NonamEVm000051t1	45.35	-3.45	1.24271	0.00112	0.00822	13.5954	17.5186	84.4117	57.7631	61.661	21.3552	162.06	43.728	47.4391	155.973	5.43516	73.6352	77.6179	112.785	39.8227	0	0	0	18.9929	0	0	3.94419	Serine/threonine-protein kinase mTOR
NonamEVm000052t1	252.59	-3.03	1.0038	0.000867	0.00679	739.741	588.644	284.879	415.296	204.433	368.015	391.781	221.729	273.046	647.038	238.649	115.32	156.688	169.142	180.566	29.9754	0	271.777	132.451	36.5547	0	91.2691	Transformation/transcription domain-associated protein
NonamEVm000055t1	101.21	-4.22	1.14954	2.59e-05	0.000541	144.616	107.178	529.893	125.039	59.5421	69.8211	128.125	87.2203	65.1896	88.1746	13.0953	90.1336	81.4946	295.843	62.9084	224.997	0	0	34.7074	11.157	0	7.4356	Teneurin-m
NonamEVm000066t1	143.5	-3.05	0.895439	0.000234	0.00269	319.165	266.809	201.702	125.083	201.018	336.784	243.676	100.411	139.848	161.728	55.9114	147.359	106.626	141.633	132.235	199.636	0	122.512	88.441	31.9769	0	34.4969	Nuclear receptor coactivator 6
NonamEVm000068t1	307.16	-3.4	1.15988	0.000785	0.00632	1688	928.729	769.458	500.022	54.0553	1084.89	116.874	73.0224	84.6303	277.953	146.12	306.503	33.6626	118.113	70.1969	0	0	310.722	30.3256	78.8142	78.7307	6.62526	Sacsin
NonamEVm000072t1	273.1	-2.71	0.839909	0.000548	0.00492	444.277	453.247	317.612	349.359	313.373	499.469	554.164	239.946	433.811	387.864	220.528	215.392	311.727	373.052	166.411	93.7057	0	395.765	95.1152	62.1346	56.8873	24.4585	NA
NonamEVm000073t1	79.88	-3.23	0.918475	0.000135	0.00179	114.089	119.242	75.7283	88.3895	133.172	25.9996	119.199	117.579	130.044	111.051	79.309	154.396	23.619	157.252	118.878	93.9093	0	37.4515	36.5945	15.2116	0	6.20677	Teneurin-m
NonamEVm000076t1	250.47	-4.15	0.900973	5.68e-07	3.77e-05	467.033	394.912	402.577	405.171	300.826	440.117	605.12	142.304	289.343	373.767	131.671	208.332	275.376	349.882	241.4	94.4115	0	239.252	104.565	22.936	0	21.2774	NA
NonamEVm000077t1	121.02	-3.53	0.903626	2.32e-05	0.000502	133.061	102.661	146.162	116.155	194.728	156.885	226.679	114.957	154.696	148.46	75.268	180.405	106.284	176.544	122.287	256.77	0	129.464	100.39	15.9404	0	4.74551	Helicase domino
NonamEVm000107t1	857.53	-2.93	0.866872	0.000279	0.00302	918.751	1318.4	2180.52	1021.8	1216.23	1093.78	1058.04	383.804	563.051	291.253	497.439	1640.87	2312.33	1142.82	871.115	599.968	0	549.329	777.045	209.412	116.486	103.26	Myosin heavy chain, non-muscle
NonamEVm000109t1	228.51	-4.15	0.870109	2.57e-07	2.07e-05	541.052	364.902	356.358	192.105	258.793	664.161	367.069	127.182	308.708	247.286	265.619	261.926	93.7487	370.225	237.84	171.729	2.95628	80.9376	69.2011	22.7596	0	22.7631	Cadherin-23
NonamEVm000114t1	183.25	-3.77	0.879753	3.68e-06	0.000143	677.793	455.371	226.651	243.071	195.482	133.617	324.782	134.413	248.949	235.839	126.487	157.193	135.234	261.858	155.608	82.3715	0	93.9174	77.0316	43.4664	0	22.4207	Rho GTPase-activating protein 32
NonamEVm000122t1	144.68	-3.84	0.961798	1.2e-05	0.000317	176.317	229.683	220.115	148.935	146.654	119.928	218.946	82.1101	153.215	246.519	192.388	116.784	57.9552	148.996	88.2078	426.551	0	255.014	128.012	20.1994	0	6.46115	Neuron navigator 2
NonamEVm000123t1	344.38	-2.04	0.629509	0.000769	0.00623	452.068	461.662	454.31	529.86	425.287	246.839	531.739	171.53	320.39	480.255	348.328	507.601	271.882	347.814	373.15	638.525	85.1881	400.026	229.801	128.531	127.76	43.8935	Plexin-A4
NonamEVm000129t1	305.46	-2.97	0.891598	0.000314	0.00329	602.348	426.289	395.749	364.473	500.441	483.213	629.022	292.928	435.668	394.265	205.477	409.728	242.719	432.719	264.709	0	0	256.174	252.787	33.8051	40.2097	57.3311	YLP motif-containing protein 1
NonamEVm000130t1	143.96	-2.75	0.880314	0.000771	0.00624	271.526	224.625	192.565	244.037	232.738	145.617	237.524	96.6437	180.739	202.628	206.368	92.7918	149.928	165.267	162.884	169.281	0	33.6189	83.3887	44.1701	0	30.7001	Fat-like cadherin-related tumor suppressor homolog
NonamEVm000132t1	202.6	-2.84	0.923758	0.000838	0.00662	273.953	299.131	319.71	286.988	349.423	334.119	348.426	93.8838	275.305	230.803	221.155	283.044	228.436	232.202	203.777	48.6229	0	249.12	91.6557	56.3937	0	31.0776	DNA-directed RNA polymerase II subunit RPB1
NonamEVm000146t1	33.66	-3.62	1.11011	0.000222	0.00259	7.76047	56.5892	52.5468	45.7994	42.6798	25.7465	115.826	39.9408	57.1938	50.2094	13.644	50.0602	72.0244	52.6422	36.7165	0	0	0	16.6651	2.16837	0	2.32078	Bridge-like lipid transfer protein family member 1
NonamEVm000155t1	129	-2.76	0.836411	0.000422	0.00407	116.661	121.661	169.681	181.402	222.66	219.546	227.415	90.9591	201.6	157.118	166.711	193.116	132.034	138.107	177.316	57.6181	0	154.338	65.311	17.9426	0	26.6996	Tyrosine-protein phosphatase Lar
NonamEVm000163t1	447.82	-2.54	0.730355	0.00025	0.00281	556.833	619.843	646.578	509.266	750.544	751.156	844.794	404.811	572.589	637.395	322.398	662.908	404.382	470.907	503.079	0	75.5719	601.739	257.128	95.7859	51.4601	112.965	Lysine-specific demethylase 3A
NonamEVm000164t1	102.23	-7.1	1.71083	1.09e-08	2.11e-06	82.4614	46.9532	369.747	165.225	84.3062	325.36	221.169	49.1361	69.5605	68.6192	12.5414	243.534	22.9771	67.6203	90.4323	213.464	0	73.3764	42.5876	0	0	0	Sortilin-related receptor
NonamEVm000177t1	98.65	-2.72	0.892722	0.000984	0.00744	123.101	125.213	90.4626	92.1812	109.075	325.772	208.973	75.2813	76.968	135.632	66.6378	77.8197	102.181	109.668	75.5074	73.1622	0	167.859	98.1884	12.1848	0	24.371	Bromo adjacent homology domain-containing 1 protein
NonamEVm000181t1	16753.3	3.57	0.857213	7.78e-06	0.000232	493.699	930.671	2064.26	652.06	3626.87	618.589	1115.06	4545.61	6126.24	1354.05	4444.16	22857	5786.75	4788.81	6542.99	119885	88097.9	13023.2	23059.4	21288.7	11126	26146.3	Collagen alpha-1(V) chain
NonamEVm000198t1	58.37	-4.27	0.95602	9.38e-07	5.37e-05	61.5425	85.0162	83.3123	71.2257	103.039	143.566	108.821	46.8855	57.9063	44.5893	21.625	106.74	67.8942	69.5461	71.5069	0	0	105.972	28.611	3.21609	0	3.0626	Nipped-B-like protein
NonamEVm000204t1	1778.01	-2.28	0.595307	7.59e-05	0.00117	1838.47	2556.8	2344.48	2403.3	1990.26	2898.9	3699.87	1756.86	2561.33	3652.69	1389	1547.64	2321.49	2087.97	1591.74	737.593	160.756	1271.02	1056.64	540.1	301.948	407.365	Clathrin heavy chain 1
NonamEVm000211t1	33.35	-6.14	1.46333	9.58e-08	1.05e-05	45.1522	48.8963	114.448	38.968	19.4054	83.983	59.2603	19.5214	22.9604	37.5136	7.35955	46.7152	97.8869	14.6033	23.111	0	0	35.041	18.8375	0	0	0	NA
NonamEVm000214t1	71.7	-2.99	0.795122	6.33e-05	0.00103	103.146	103.693	63.6173	59.7068	162.609	122.25	112.349	62.9116	121.338	70.647	63.3351	74.6623	60.3822	156.836	44.9133	0	89.2495	13.9376	67.4319	15.1887	0	9.24763	NA
NonamEVm000217t1	46.15	-3.13	0.986306	0.000476	0.00444	44.2793	42.6477	124.663	65.9916	59.9049	93.4487	70.385	25.3836	94.5553	67.7311	8.83263	52.0817	31.5352	78.5536	49.1127	0	0	72.3865	18.6739	4.33395	0	10.6989	Protein polybromo-1
NonamEVm000225t1	168.79	-2.94	0.901285	0.000412	0.00402	340.252	242.757	210.63	279.251	302.968	206.637	234.473	143.13	185.177	195.62	106.639	152.134	210.869	189.506	140.833	255.553	0	98.2724	146.03	51.3028	0	21.3657	Pre-mRNA-splicing factor CWC22 homolog
NonamEVm000227t1	91.2	-3.6	0.899658	1.47e-05	0.000366	132.974	169.13	104.183	144.199	134.101	82.7164	190.617	86.3844	172.907	211.859	68.438	87.7525	54.9815	105.695	84.1041	0	0	115.584	39.4723	10.7113	0	10.5187	Polycomb protein Asx
NonamEVm000229t1	383.76	-4.14	0.846575	1.51e-07	1.43e-05	1176.42	752.225	523.585	472.46	597.876	939.558	623.158	204.024	446.251	307.027	172.767	384.91	380.768	454.982	308.254	94.0333	0	243.841	264.739	39.1569	45.3441	11.3877	STE20-like serine/threonine-protein kinase
NonamEVm000235t1	579.19	-2.45	0.671307	0.000141	0.00185	800.157	931.782	752.195	650.696	654.677	560.89	1464.15	402.476	1284.67	1073.6	403.435	407.427	408.11	1026.2	485.728	260.772	61.5976	406.665	312.428	165.217	153.561	75.6406	Cell adhesion molecule Dscam2
NonamEVm000236t1	97.16	-2.95	0.937603	0.000607	0.00529	59.1771	49.2264	86.6048	99.3714	76.402	279.75	133.58	20.2347	41.2879	82.2056	31.8176	100.756	46.4735	32.4289	39.1856	586.56	134.374	200.206	21.5229	12.3999	0	3.94334	NACHT, LRR and PYD domains-containing protein 3
NonamEVm000241t1	88.92	-4.03	0.900254	1.2e-06	6.44e-05	199.797	171.042	122.321	136.173	91.4049	125.371	210.099	108.673	149.274	169.977	36.4866	67.8389	68.3398	134.248	64.7284	0	0	31.4005	50.7088	14.2105	0	4.16272	Lysosomal-trafficking regulator
NonamEVm000243t1	299.64	-3.29	1.0878	0.000663	0.00562	784.106	494.197	964.154	677.787	79.956	835.767	572.896	76.6554	111.001	207.466	320.793	333.291	100.912	79.6632	159.564	538.215	0	50.3699	73.1835	28.5188	100.532	3.1341	Murinoglobulin-1
NonamEVm000246t1	65.98	-5.77	1.35914	1.83e-07	1.65e-05	53.7087	60.209	25.2413	75.0578	223.4	86.997	84.7734	55.7498	134.053	147.789	77.1759	87.6454	52.1737	70.9909	74.3436	87.4009	0	28.9129	25.8567	0	0	0	Latrophilin Cirl
NonamEVm000259t1	76.98	-4.07	0.986819	5.31e-06	0.000178	55.263	76.7406	233.018	95.8597	110.668	142.008	164.63	68.0947	76.4056	49.0675	26.3027	114.883	102.643	109.665	66.8931	0	0	87.393	102.184	8.69194	0	3.10305	Autophagy-related protein 2 homolog B
NonamEVm000261t1	79.46	-3.24	0.972619	0.000251	0.00282	147.596	138.398	133.646	91.9042	230.512	99.7302	86.5806	30.4398	102.422	75.0535	47.7179	100.497	30.4723	105.253	81.2027	0	0	150.049	68.9373	14.1558	0	13.4809	Serine/threonine-protein kinase haspin
NonamEVm000267t1	27.99	-4.76	1.38066	2.26e-05	0.000492	7.05618	29.2119	34.976	28.7013	68.5092	12.5147	91.2192	31.7992	61.6132	37.7159	14.2042	38.19	15.0376	41.3681	37.967	0	0	52.0786	13.673	0	0	0	Intraflagellar transport protein 172 homolog
NonamEVm000271t1	104.51	-2.84	0.8447	0.000322	0.00335	112.054	195.423	179.628	143.689	129.469	173.695	204.148	67.6132	154.297	219.45	115.424	114.587	121.108	127.737	93.65	0	0	77.1637	20.0008	20.1614	0	29.8143	Partitioning defective 3 homolog
NonamEVm000275t1	248.26	-4.83	1.47588	3.38e-05	0.000658	23.1718	33.0588	36.4001	89.6367	207.498	111.931	257.147	191.164	129.069	100.12	460.082	594.567	2446.29	63.8618	349.537	172.179	0	168.432	27.6318	0	0	0	NA
NonamEVm000281t1	74.7	-3.83	1.1391	0.000123	0.00167	42.7951	75.0392	117.451	86.0606	265.008	36.4883	161.994	25.5073	97.0741	77.2118	11.097	235.079	55.3876	110.314	94.1219	75.1488	0	0	70.2727	5.21705	0	2.21927	Nuclear pore complex protein Nup153
NonamEVm000283t1	1635.35	-3.98	1.38024	0.000406	0.00398	2285.53	1269.06	231.756	1411.1	733.095	9241.7	545.611	1425.79	688.482	390.346	7577.98	6362.68	28.8525	833.054	2000.34	773.427	0	67.958	36.9036	32.6943	0	41.3606	Alpha-1-inhibitor 3
NonamEVm000292t1	82.97	5.4	1.70441	1.39e-05	0.000353	0	2.63092	0	6.82911	83.271	0	33.1882	112.03	102.421	47.4137	1.32128	59.2337	78.5974	61.4742	81.7491	109.912	0	131.415	70.2819	582.624	0	260.854	Multiple epidermal growth factor-like domains protein 6
NonamEVm000294t1	48.18	-3.18	0.998456	0.000432	0.00414	17.6862	29.7602	84.7094	76.5683	84.7037	16.1205	84.6731	39.5391	83.1941	78.8068	46.229	64.4762	74.5017	96.4056	82.2528	30.8704	0	18.8673	42.2286	0	0	8.35466	NA
NonamEVm000300t1	47.34	-3.78	0.917876	7.31e-06	0.000222	49.722	61.3069	87.7413	43.5558	64.4058	108.026	65.2361	35.3905	38.4698	36.0372	41.0022	69.1255	60.365	60.5603	59.7443	0	0	99.4381	53.0836	2.16622	0	6.19063	Tyrosine-protein phosphatase non-receptor type 23
NonamEVm000304t1	1269.72	-4.06	0.861239	3.74e-07	2.79e-05	7975.14	3884.01	3306.14	1891.64	250.343	1294.07	498.768	195.776	355.687	603.9	2593.38	380.587	604.968	490.497	366.617	1480.01	252.213	236.979	660.094	273.732	215.354	123.956	Murinoglobulin-1
NonamEVm000305t1	65.51	-3.31	0.996914	0.000249	0.00281	71.3892	81.3966	51.7324	45.27	84.0059	302.42	171.817	37.1186	67.1655	140.998	20.7074	66.2326	65.4566	53.2506	58.3156	0	0	79.2379	32.5769	8.04984	0	4.04434	Ubiquitin carboxyl-terminal hydrolase 31
NonamEVm000308t1	2114.93	-3.49	0.829785	6.98e-06	0.000215	4246.08	4406.77	1579.84	6703.76	1199.38	3322.07	5939.21	1329.24	1633.7	6483.14	684.057	1382.3	983.785	1617.18	1903.64	449.566	98.9927	952.175	950.617	141.45	136.365	385.125	Low-density lipoprotein receptor-related protein 1B
NonamEVm000311t1	91.62	-2.73	0.874636	0.000771	0.00624	65.1905	173.048	184.221	216.586	127.086	86.9332	94.3403	79.4588	93.2227	85.1577	115.599	102.064	119.53	73.4541	65.7297	85.5164	0	117.162	85.3525	14.257	0	31.7334	Rho GTPase-activating protein 20
NonamEVm000323t1	21.79	-4.89	1.41375	1.74e-05	0.000409	36.8876	26.5566	21.0218	22.0836	10.2353	108.142	83.0713	8.98735	8.75236	28.3729	6.75479	50.0499	29.3141	21.2278	10.4402	0	0	0	7.5593	0	0	0	Xaa-Pro aminopeptidase 1
NonamEVm000325t1	39.06	-2.93	0.888431	0.000374	0.00373	53.427	88.4937	49.5905	32.5418	51.7023	149.18	54.21	28.9759	60.4181	26.9795	68.7255	24.6054	25.4894	45.645	24.4252	0	0	28.2817	28.0676	3.99711	0	14.5536	NA
NonamEVm000332t1	161.52	-3.02	0.89622	0.000271	0.00297	218.677	198.841	267.388	129.692	340.085	159.639	223.261	93.9798	181.804	147.114	159.881	257.665	177.655	213.652	228.192	175.364	0	97.2167	224.404	31.7415	0	27.2027	NA
NonamEVm000334t1	105.25	-3.03	0.868999	0.00018	0.00221	216.09	181.063	162.06	162.292	125.325	274.362	145.726	60.2446	77.6704	95.7397	105.098	69.707	189.372	126.771	69.8885	111.53	0	49.4117	43.999	38.4551	0	10.6508	E3 ubiquitin-protein ligase TTC3
NonamEVm000342t1	54.45	-2.86	0.898372	0.000588	0.00518	93.9041	80.1875	62.8647	67.5752	100.081	24.6051	80.4739	38.5355	80.7571	63.9265	48.8072	63.9369	31.482	78.2346	67.5221	132.493	0	13.1956	46.9087	12.9576	0	9.38358	Nuclear exosome regulator NRDE2
NonamEVm000349t1	57.68	-5.37	1.27974	4.99e-07	3.46e-05	60.6054	42.9465	82.9932	69.0509	115.604	118.346	114.237	34.6878	103.506	84.9779	93.3693	71.2129	57.229	109.231	54.2371	0	0	28.1188	27.2927	1.22622	0	0	Transcription initiation factor TFIID subunit 2
NonamEVm000350t1	138.6	-3.56	0.958106	4.78e-05	0.000836	256.668	374.834	232.919	297.58	158.964	416.811	316.146	70.7232	140.227	199.572	111.452	47.1582	78.295	145.013	76.5246	0	0	49.8712	30.6676	43.4687	0	2.34367	Structure-specific endonuclease subunit SLX4
NonamEVm000355t1	130.67	-3.1	0.874072	0.00013	0.00175	393.33	219.433	165.02	156.505	149.574	256.037	197.279	82.8009	127.414	169.652	76.9998	167.856	119.391	113.145	127.818	108.458	0	108.564	71.3051	17.9095	0	46.2208	Rap guanine nucleotide exchange factor 2
NonamEVm000382t1	100.14	-5.33	1.41764	2.77e-06	0.000117	164.711	168.434	83.9609	293.785	78.4104	64.0856	355.112	50.9384	120.078	240.82	31.4459	82.7481	256.573	35.0867	52.6173	108.314	0	0	13.5461	0	0	2.38982	NADPH oxidase 5
NonamEVm000389t1	101.44	-3.89	0.94612	6.96e-06	0.000215	379.111	359.698	157.57	155.684	107.529	379.466	97.0317	33.0728	75.2537	94.9755	107.143	48.796	12.5322	59.7261	32.7366	0	0	67.2349	27.5347	23.4374	0	13.2544	Ras GTPase-activating protein raskol
NonamEVm000390t1	443.67	-2.33	0.641847	0.000167	0.00209	1152.49	959.345	372.067	442.044	487.227	946.134	471.602	369.915	494.38	535.915	430.758	304.094	219.712	409.568	403.026	83.1609	299.37	700.143	241.372	159.153	212.254	67.0218	Misshapen-like kinase 1
NonamEVm000391t1	231.09	-3.25	1.06593	0.000626	0.00539	680.785	751.963	521.167	873.814	83.5145	225.825	115.01	63.7103	201.212	215.605	619.052	358.85	27.2719	63.2703	92.4835	0	0	49.898	19.3389	3.26093	72.4424	45.5595	Transferrin
NonamEVm000412t1	362.86	-3.41	1.1163	0.000531	0.00482	1124.5	757.64	579.278	387.275	539.32	1170.51	345.602	160.113	440.013	354.244	185.654	370.208	211.835	367.814	277.486	0	0	318.062	269.359	102.886	0	21.056	SLIT-ROBO Rho GTPase-activating protein 1
NonamEVm000415t1	140.68	-2.97	0.908775	0.000401	0.00394	127.942	270.984	226.004	150.685	165.468	286.763	178.682	76.5128	180.222	186.141	156.85	118.481	235.594	161.345	111.908	194.648	0	141.086	70.4108	37.652	0	17.6029	DENN domain-containing protein 1A
NonamEVm000416t1	40.14	-3.83	1.03595	3.72e-05	0.000704	91.7157	83.9621	32.3246	50.1452	78.833	78.1693	96.9465	17.7412	51.8083	67.5827	27.907	41.489	46.7862	64.7521	24.506	0	0	0	21.09	7.24055	0	0	NA
NonamEVm000423t1	97.33	-3.68	0.896188	8.7e-06	0.000254	124.596	136.611	194.153	120.603	205.478	123.187	147.095	84.9979	131.778	142.287	81.0267	156.833	76.5217	118.087	145.987	0	0	37.4115	92.1179	17.3768	0	5.17146	Host cell factor
NonamEVm000424t1	94.44	-4.01	0.895137	1.25e-06	6.59e-05	212.794	252.286	141.514	126.031	252.939	138.599	95.3172	38.2583	123.087	109.143	119.95	88.117	61.9315	79.6888	89.5509	0	0	39.9456	85.2191	11.7923	0	11.4586	NA
NonamEVm000429t1	80.97	-3.04	1.0055	0.000837	0.00662	148.892	113.317	78.1586	81.1916	143.111	124.28	111.604	43.5593	88.0828	84.2608	46.0568	84.0878	100.782	138.217	99.2255	0	0	179.568	91.6206	23.0243	0	2.20983	NA
NonamEVm000432t1	173.75	-3.66	1.00295	5.45e-05	0.00092	89.9608	178.544	44.449	163.181	352.536	136.086	908.442	140.498	273.808	900.574	98.9824	71.0072	45.2634	149.629	170.394	30.4034	0	45.9058	7.57932	4.22431	2.692	8.2794	Whirlin
NonamEVm000433t1	172.15	-3.47	0.948228	6.39e-05	0.00104	348.966	214.794	248.458	217.291	285.366	270.939	271.447	130.304	214.333	208.563	162.029	188.081	202.01	271.154	234.475	0	0	115.715	157.067	11.2007	0	35.2061	Probable lysine-specific demethylase 4B
NonamEVm000441t1	229.47	-3.64	0.834125	2.93e-06	0.000122	801.863	621.515	240.579	298.355	290.573	240.9	315.85	75.3492	216.112	213.493	200.157	254.385	326.768	209.844	189.903	79.844	0	203.665	171.922	19.3799	60.0584	17.8194	Protein PALS1
NonamEVm000442t1	1118	-3.82	0.932461	7.93e-06	0.000236	5822	3231.12	1768.8	2097.71	647.274	979.637	1227.51	255.676	499.149	618.657	1349.86	1742.65	815.549	872.278	709.192	516.266	0	324.505	628.139	251.089	104.904	134.112	Calpain-B
NonamEVm000454t1	96.83	-3.41	0.910745	4.85e-05	0.000848	182.821	109.041	112.423	212.379	111.276	154.478	260.145	63.7965	148.928	147	112.128	66.7203	91.4131	122.378	68.4031	0	0	95.422	47.2694	20.1295	0	4.16845	Regulator of nonsense transcripts 2
NonamEVm000465t1	87.72	-3.29	0.967725	0.000189	0.0023	95.8864	236.111	124.601	97.6243	59.7256	362.949	125.825	51.233	141.876	240.704	78.1202	36.1292	64.8816	78.9442	52.6593	0	0	31.7369	22.1796	26.069	0	2.65376	Polyamine-transporting ATPase 13A3
NonamEVm000466t1	130.94	-3.32	0.910574	7.46e-05	0.00116	427.049	246.8	185.515	163.804	200.356	192.078	143.625	71.5923	129.922	113.514	102.498	114.729	88.8736	111.722	132.941	204	0	96.6522	97.7452	47.5517	0	9.62052	Sister chromatid cohesion protein PDS5 homolog B-B
NonamEVm000469t1	196.14	-3.76	0.968372	2e-05	0.000452	616.498	317.484	350.661	310.521	425.779	329.346	339.225	142.291	223.796	161.756	165.676	189.024	84.4529	203.505	205.462	0	0	67.2978	125.07	48.327	0	8.94404	NA
NonamEVm000472t1	271.82	-3.14	0.982994	0.000448	0.00424	256.862	387.629	242.268	365.296	430.487	350.319	641.902	135.197	313.001	452.253	248.655	350.369	178.241	196.209	313.049	644.369	0	211.989	197.298	40.2619	0	24.2959	Fibronectin type-III domain-containing protein 3a
NonamEVm000474t1	106.35	-3.02	0.993665	0.000819	0.00651	198.439	248.417	133.872	137.011	128.277	132.675	171.16	70.5977	198.78	155.204	78.0732	94.4355	92.8293	133.053	127.718	0	0	124.58	68.6829	42.3912	0	3.50355	Ral GTPase-activating protein subunit beta
NonamEVm000477t1	292.96	-4.57	1.10544	2.66e-06	0.000113	1908.77	1673.87	377.077	709.495	126.072	825.571	42.5038	48.0168	107.272	114.288	249.493	19.4798	33.6223	29.0165	14.0617	0	0	24.9552	62.838	43.4681	0	35.1877	Receptor-type tyrosine-protein phosphatase zeta
NonamEVm000482t1	30.87	-3.53	1.2841	0.0011	0.0081	14.2491	12.9925	43.6241	13.6632	82.0232	73.7578	73.6699	20.5859	54.1453	20.0367	8.77627	85.4828	46.8283	38.9241	52.3718	0	0	0	35.9045	0	0	2.07345	Pre-mRNA-splicing factor ATP-dependent RNA helicase PRP16
NonamEVm000483t1	61.39	-3.82	1.27672	0.000382	0.0038	16.5862	50.1117	91.3936	107.41	38.5887	29.1345	157.093	44.6753	37.2468	85.0398	17.4779	37.4383	54.8229	49.2369	74.8943	367.014	0	73.9825	14.116	0	0	4.22068	NA
NonamEVm000493t1	209.78	18.97	3.40095	4.53e-10	1.43e-07	0	0	0	0	0	0	149.444	599.076	132.484	26.4536	0	247.65	912.274	567.384	574.066	0	0	753.878	333.29	117.369	0	201.896	Myosin heavy chain, muscle
NonamEVm000494t1	52.23	-3.31	0.871686	4.32e-05	0.000779	128.296	60.1966	69.8656	60.9848	116.204	79.9205	59.9969	21.0721	63.7586	28.4142	42.6486	83.5181	50.9073	38.8886	72.021	62.5924	0	24.9435	67.6818	13.0431	0	4.1419	Probable ATP-dependent RNA helicase DHX34
NonamEVm000501t1	779.33	-5.47	1.62744	7.02e-06	0.000216	5381.34	2988.11	1855.61	2502.65	11.4685	175.931	37.2713	3.44305	11.8092	31.0958	4045.42	2.65494	5.55773	12.5243	5.07495	0	0	31.609	4.86691	8.18227	0	30.5885	Hemocytin
NonamEVm000503t1	249.45	-2.39	0.57249	1.64e-05	0.000396	244.582	345.315	344.153	230.773	444.925	461.147	262.211	109.988	297.443	200.828	275.96	448.924	482.072	242.945	265.621	172.459	68.0514	243.646	184.522	32.6721	72.5713	57.0676	Coatomer subunit alpha
NonamEVm000512t1	646.4	-2.25	0.712297	0.000913	0.00704	1351.21	1036.77	787.197	780.821	597.858	1999.56	930.068	242.188	415.483	698.899	475.06	477.979	634.703	519.596	397.683	565.43	215.564	993.539	525.888	212.154	336.138	27.0867	DIS3-like exonuclease 2
NonamEVm000525t1	404.24	-4.61	1.19783	7.52e-06	0.000227	4885.77	380.683	368.663	1751.56	66.5126	301.959	105.655	41.7775	65.1316	112.41	172.674	53.3089	39.5898	62.011	26.4544	0	0	241.013	123.174	31.6746	51.7993	11.5449	NA
NonamEVm000527t1	96.01	-3.05	1.01736	0.000895	0.00694	298.892	306.682	113.776	196.094	64.1496	208.199	80.9951	16.3102	103.102	147.445	112.551	36.1317	117.88	97.1806	90.6413	0	0	10.4914	57.0024	40.7073	0	13.8825	Phospholipid-transporting ATPase ID
NonamEVm000538t1	979.18	-2.46	0.705899	0.000255	0.00285	1211.62	1685.81	1216.84	1696.18	765.179	1204.64	2275.06	1271.78	1540.64	2780.59	676.128	471.369	844.153	1348.04	748.025	85.1532	100.123	738.786	248.223	232.235	166.154	235.338	Splicing factor 3B subunit 1
NonamEVm000540t1	155.74	-3.35	0.99238	0.000196	0.00237	409.934	335.699	288.869	243.677	157.076	271.556	258.843	59.7521	145.014	233.438	108.765	122.249	171.778	130.08	109.66	0	0	210.977	106.278	40.0112	0	22.5974	NA
NonamEVm000541t1	107.59	-4.32	1.35156	0.000102	0.00146	20.2083	70.9264	17.3905	97.7037	127.913	166.625	223.559	97.5502	116.913	214.701	237.944	100.038	136.186	124.489	151.31	146.803	0	281.285	33.787	0	0	1.62491	NA
NonamEVm000549t1	140.07	-3.29	0.786842	9.14e-06	0.000264	42.7855	66.127	131.063	119.533	342.278	125.948	213.002	52.4526	91.1184	80.104	72.9674	422.145	215.5	99.2857	177.771	360.061	144.903	168.466	138.863	14.1344	0	3.10701	Contactin-4
NonamEVm000555t1	1817	-1.79	0.559309	0.000994	0.00749	3641.43	3757.76	1466.24	2145.52	1650.22	2968.32	3556.8	2086.35	2300.19	2660.38	1467.39	1339.11	2744.42	1590.42	1652.51	610.795	219.378	783.402	948.772	849.954	595.075	939.517	NA
NonamEVm000563t1	145.96	-2.93	0.907971	0.000467	0.00438	347.606	251.028	89.1489	233.87	220.319	235.211	210.01	85.8614	221.324	264.526	148.668	78.9547	135.548	171.581	142.276	73.8075	0	157.031	81.0234	39.8582	0	23.425	NA
NonamEVm000565t1	79.48	-4.08	1.23926	0.00011	0.00154	23.8788	25.5475	197.128	28.2217	109.274	125.693	255.705	102.442	162.72	109.943	14.785	44.4841	52.6774	219.086	135.775	16.128	0	25.7239	94.0739	0	0	5.33098	Ras-associated and pleckstrin homology domains-containing protein 1
NonamEVm000568t1	164.1	-3.4	1.01647	0.000212	0.00251	449.52	491.54	335.547	280.287	70.4122	639.115	187.743	66.4088	143.01	201.641	244.095	166.647	40.587	103.055	58.462	0	0	5.72968	53.7735	34.9493	0	37.7612	NA
NonamEVm000573t1	1000.95	-2.73	0.749308	0.00012	0.00163	893.107	953.963	1863.82	1260.65	1355.4	2221.23	1895.16	634.536	795.285	1014.71	460.812	1666.3	880.889	749.616	954.944	1976.27	129.279	1496.24	361.87	73.3312	286.989	96.4998	NA
NonamEVm000582t1	37.94	-4.83	1.36576	1.54e-05	0.000379	80.1506	49.7683	40.082	25.2032	134.288	68.193	42.9281	23.4677	57.1776	26.5181	8.39546	51.6757	24.3079	55.9895	43.9149	0	0	80.7976	20.1427	0	0	1.73032	Histone-lysine N-methyltransferase, H3 lysine-36 specific
NonamEVm000584t1	34.36	-3.49	0.873623	1.71e-05	0.000405	92.0167	52.0706	34.613	41.0197	66.8291	49.7926	64.4501	24.7708	30.4656	53.3916	32.297	39.5284	26.5848	37.2841	38.1965	0	0	38.6796	23.3008	9.76605	0	0.82158	NA
NonamEVm000588t1	4223.72	5.06	1.40104	7.65e-06	0.00023	0	8.47653	521.848	713.503	56.0746	0	724.506	1559.16	1255.62	1440.6	86.8876	1004.4	1380.63	2919.91	1440.34	2264.46	159.47	4385.67	7299.24	36858.1	19023.3	9819.54	NA
NonamEVm000600t1	187.22	-2.7	0.782587	0.000254	0.00284	47.149	170.395	145.28	222.318	299.855	242.191	343.921	163.535	305.493	341.922	112.228	172.945	122.067	205.588	199.715	483.825	213.289	237.841	46.6429	20.3061	0	22.4043	Unconventional myosin-XV
NonamEVm000603t1	85.61	-3.09	1.04994	0.00104	0.00775	250.05	172.146	74.9665	62.9559	69.2053	124.962	59.0116	21.6328	60.2329	62.5942	48.3933	44.8037	107.176	45.9977	38.0346	474.922	0	41.5374	89.9999	28.9884	0	5.71346	Lateral signaling target protein 2 homolog
NonamEVm000605t1	139.31	-2.87	0.920651	0.000699	0.00583	429.496	281.26	161.43	155.59	135.724	186.538	164.717	71.5668	158.383	102.372	60.671	174.349	237.452	215.978	130.7	78.8786	0	125.763	110.856	67.3761	0	15.6532	Eye-specific diacylglycerol kinase
NonamEVm000608t1	65.28	-4.73	0.948576	4.23e-08	5.69e-06	137.118	84.7311	69.0644	100.823	135.032	107.038	103.893	77.3824	88.9938	63.7618	85.1426	76.0426	88.0675	85.0806	73.0715	0	0	10.4107	44.4112	5.15357	0	0.865007	Zinc finger CCCH domain-containing protein 18
NonamEVm000609t1	65.9	-3.26	0.879036	6.51e-05	0.00105	82.6096	84.1049	110.639	65.1547	91.7856	79.9563	123.514	81.7428	95.3746	121.572	35.4669	78.4548	62.5641	88.5654	85.5142	107.203	0	0	36.4058	8.39722	0	10.6651	Serine/threonine-protein kinase SMG1
NonamEVm000610t1	46.7	-3.83	1.06874	5.69e-05	0.000951	78.1528	93.6669	42.7354	49.3739	61.5011	119.404	62.0091	13.5194	106.039	66.7342	29.6809	32.0529	43.9644	77.4236	49.2956	0	0	67.7904	26.4315	0	0	7.72901	Histone-lysine N-methyltransferase eggless
NonamEVm000612t1	70.02	-6.13	1.466	1.04e-07	1.11e-05	81.7412	88.7099	39.0246	86.2114	142.567	102.459	109.253	45.3623	82.0217	93.0502	17.6927	111.753	73.1656	61.2459	96.7763	49.8335	0	221.096	38.4794	0	0	0	Chloride channel protein 2
NonamEVm000619t1	84.93	-4.38	0.968564	6.44e-07	4.13e-05	144.472	127.245	52.7618	82.7693	140.385	182.378	141.613	55.5316	121.511	100.075	49.4092	83.9977	94.3619	89.6609	89.9323	194.016	0	71.401	38.8517	6.21777	0	1.97374	THO complex subunit 2
NonamEVm000623t1	68.73	-3.64	0.85012	4.21e-06	0.000154	176.685	122.008	83.8138	86.8494	121.608	145.271	99.766	44.4009	83.0849	91.373	36.5707	66.6958	50.7748	79.9527	72.9196	0	0	78.9532	51.2698	10.3156	0	9.76505	KAT8 regulatory NSL complex subunit 1
NonamEVm000629t1	60.37	-3.15	0.929861	0.000224	0.00261	31.3414	60.3437	84.4987	75.2039	126.285	102.516	118.047	73.2901	117.524	109.313	43.3764	67.8161	86.9258	104.098	51.2982	0	0	36.6187	26.964	12.738	0	0	Nucleolar pre-ribosomal-associated protein 1
NonamEVm000635t1	82.66	-3.31	1.19131	0.00131	0.0092	6.72239	33.5564	984.93	42.2776	44.4474	62.5022	123.173	25.4891	46.9946	52.7398	9.71234	79.5713	83.1677	87.0629	43.4417	0	0	7.60557	34.9787	42.5019	0	7.59371	Proteasome activator complex subunit 4
NonamEVm000637t1	95.64	-4.06	0.92414	1.72e-06	8.21e-05	166.87	140.892	159.005	103.674	111.558	167.986	200.016	46.8306	77.5571	110.465	69.7207	94.1383	178.952	65.2619	70.8702	59.3385	0	169.532	93.5832	9.94644	0	7.85069	Tudor domain-containing protein 7A
NonamEVm000646t1	265.72	-2.43	0.539228	3.72e-06	0.000143	311.797	314.351	407.556	231.431	576.146	461.767	279.093	163.493	308.998	240.044	230.056	399.238	334.55	342.738	307.032	172.545	98.0452	137.255	355.384	79.2717	45.3825	49.759	Importin-5
NonamEVm000663t1	91.38	-3.36	1.03915	0.000312	0.00328	80.1138	215.573	104.215	173.53	90.8078	203.231	51.0477	85.4602	118.616	193.982	58.5163	40.1438	60.2542	157.534	102.399	0	0	198.406	54.4677	8.75371	0	13.4152	NA
NonamEVm000671t1	55.98	-3.58	0.951554	3.82e-05	0.000716	80.7215	101.395	39.9617	54.4673	183.907	21.0435	53.6299	35.6734	78.3398	70.8804	25.7037	99.8693	71.429	70.1033	78.097	49.4612	0	45.9747	60.0428	6.87309	0	4.06298	Retinoblastoma-like protein 1
NonamEVm000672t1	25.11	-4.82	1.40956	2.22e-05	0.000488	3.90785	12.6177	63.1913	14.7277	59.9911	37.1894	50.0976	26.7212	28.4105	24.8258	9.71751	70.6872	32.5463	34.576	41.5649	0	0	6.82784	34.9272	0	0	0	Trimethylguanosine synthase
NonamEVm000673t1	77.66	-2.72	0.821526	0.00042	0.00406	149.957	128.849	107.884	156.662	91.9755	118.04	158.774	82.2781	68.6599	118.618	64.7012	73.5581	50.46	101.329	69.5345	0	0	79.2684	43.7916	19.82	0	24.3325	Inactive histone-lysine N-methyltransferase 2E
NonamEVm000674t1	286.97	-2.86	0.931128	0.000819	0.00651	594.293	488.51	396.182	322.56	619.131	489.902	369.532	172.272	406.268	376.429	282.401	316.013	225.189	406.428	273.312	0	0	222.605	205.488	28.657	102.777	15.3259	Pseudouridylate synthase 7 homolog
NonamEVm000676t1	41.66	-3.25	1.03673	0.000488	0.00452	21.4525	35.2706	54.8048	52.0984	65.5267	40.239	74.1774	29.1596	47.2708	51.2042	46.9767	48.7232	42.3039	27.442	18.6111	205.019	0	12.5589	37.2488	2.19226	0	4.17997	ATP-dependent RNA helicase DHX30
NonamEVm000678t1	104.13	-5.09	1.0368	3.64e-08	5.13e-06	197.225	169.93	119.645	101.078	133.25	231.451	199.454	83.01	192.419	233.467	69.5788	78.8512	127.37	107.698	99.9205	0	0	81.0454	59.422	0	0	5.97808	Rho guanine nucleotide exchange factor 4
NonamEVm000684t1	276.78	-3.81	0.95523	1.23e-05	0.000322	927.839	565.523	255.6	287.203	347.709	871.34	315.542	87.6999	247.925	261.448	171.539	222.1	811.414	195.188	192.263	0	0	98.0618	152.183	27.7543	37.8078	12.9646	Unconventional myosin ID
NonamEVm000694t1	140.43	-3.98	0.763281	3.37e-08	4.93e-06	321.467	315.044	175.845	188.935	83.5335	282.696	188.024	149.174	145.202	169.372	143.563	78.9614	105.573	143.783	73.1563	105.42	139.717	186.177	57.4335	33.3035	0	2.98631	Ankyrin repeat and SAM domain-containing protein 1A
NonamEVm000705t1	40.82	-3.68	0.964589	2.83e-05	0.000577	75.0855	69.2409	40.0854	56.6576	47.5304	111.774	83.9674	25.6202	71.9708	89.2916	39.7865	15.5905	14.32	69.1439	33.4647	0	0	34.4647	11.8955	1.20438	0	6.89235	Transport and Golgi organization protein 6 homolog
NonamEVm000707t1	158.66	-3.11	1.04539	0.000925	0.00711	928.042	292.522	101.618	283.01	101.863	109.935	223.089	101.193	161.899	181.864	105.329	96.6073	85.3783	123.855	76.7475	0	3.30751	322.901	98.4092	47.3379	0	45.6317	Retrovirus-related Pol polyprotein from type-1 retrotransposable element R2
NonamEVm000708t1	41.69	-6.95	1.52429	2.77e-09	7.09e-07	98.1928	208.28	49.602	53.1543	55.1597	17.5516	39.6877	35.5675	33.6393	49.3386	36.9865	22.4479	29.7017	37.9954	29.9874	0	0	101.273	18.6815	0	0	0	NA
NonamEVm000712t1	91.7	-3.15	0.969462	0.00036	0.00364	105.094	107.387	183.314	72.1696	187.695	127.767	115.796	58.3299	110.315	78.798	119.189	109.476	127.799	93.4709	109.966	172.097	0	37.3846	73.2219	27.181	0	1.03633	Ribosome quality control complex subunit NEMF homolog
NonamEVm000717t1	24.81	-3.31	1.09996	0.000676	0.0057	39.6265	19.514	41.0583	22.5918	43.8781	55.3631	43.7349	8.4721	31.2392	15.6193	2.27129	57.9562	27.4863	32.9428	27.4808	53.4355	0	0	18.4687	0	0	4.62058	E3 ubiquitin-protein ligase TRIM33
NonamEVm000722t1	64.24	-3.76	0.894056	5.32e-06	0.000178	79.9727	101.749	69.7589	40.0088	99.3237	110.439	96.0065	71.9574	74.3687	42.7941	38.2398	65.3806	67.7813	83.1726	51.9262	144.96	0	117.334	46.709	6.62311	0	4.79005	NA
NonamEVm000734t1	28.3	-4.86	1.53045	4.14e-05	0.000755	0	27.6156	79.8535	19.5692	35.7006	59.8039	57.3643	20.0934	34.4085	23.1961	1.17006	62.2308	35.0529	44.1302	31.5246	0	0	69.7212	21.2653	0	0	0	Axin-1
NonamEVm000744t1	3176.95	3.64	1.3107	0.000886	0.0069	14.5328	14.9942	258.817	612.124	116.583	0	538.171	263.919	417.848	273.791	22.9033	439.674	550.367	1068.44	473.66	40258	87.8609	13604.1	1406.35	2399.99	6752.15	318.715	NA
NonamEVm000746t1	4998.76	-4.6	1.4931	8.69e-05	0.00129	14293.5	18459.1	3723.98	11417.4	2225.5	19283	10713.4	2129.1	1337.24	6498.31	7654.94	3823.85	5.01952	787.861	2242.54	0	0	3727.63	1313.85	70.9499	0	265.637	NA
NonamEVm000752t1	43.82	-2.89	0.988582	0.0013	0.00915	17.8823	30.6357	79.9606	29.9791	97.6907	33.7879	90.5246	22.4405	60.0341	58.6393	14.4049	138.652	64.0654	70.1863	78.8249	0	0	18.7679	46.9262	5.4565	0	5.20025	Importin-9
NonamEVm000754t1	41.71	-4.35	1.09027	6.31e-06	0.000203	67.7213	69.6442	62.5995	98.3303	33.2898	111.929	110.422	10.7796	46.5522	56.1767	21.9206	33.1184	36.8058	54.5527	22.1582	0	0	18.7143	58.6964	3.26024	0	1.03505	NA
NonamEVm000756t1	79.12	-2.91	0.909086	0.000518	0.00473	149.02	102.936	299.943	112.772	41.1308	85.4319	136.461	26.3602	73.5786	72.4406	108.776	72.405	105.964	43.3634	71.3119	32.1167	0	93.0881	62.6022	18.9713	0	31.9923	Ubiquitin conjugation factor E4 A
NonamEVm000762t1	74.83	-3.31	1.04251	0.000395	0.00389	26.0716	52.1917	56.0869	135.425	184.552	70.7457	118.399	53.4359	142.004	78.0424	40.3793	324.315	51.1627	87.7946	167.961	0	0	44.1354	6.0639	0	0	7.59642	Signal peptide, CUB and EGF-like domain-containing protein 2
NonamEVm000775t1	32.6	-4.1	1.1814	5.91e-05	0.000979	34.1734	50.0434	56.4695	32.6655	35.635	56.4506	49.789	10.3918	49.6969	37.1526	5.63426	59.8727	40.3249	37.7201	54.0105	0	0	37.7541	66.3053	0	0	3.13455	Cysteine/serine-rich nuclear protein 3
NonamEVm000777t1	350.05	-2.23	0.655212	0.000403	0.00395	642.835	573.567	488.624	386.918	333.478	509.064	350.557	199.172	281.308	381.959	289.223	243.223	188.988	272.261	307.393	683.784	60.4261	940.167	248.444	136.213	72.4348	111.11	Ran-binding protein 3
NonamEVm000783t1	51.87	-3.59	1.09908	0.000219	0.00257	83.4636	94.0787	46.717	77.4589	48.2852	55.2474	57.8278	17.9139	51.5967	52.9221	25.6878	30.8751	30.6774	47.0992	24.4752	311.822	0	55.1781	20.7368	9.15279	0	0	Integrator complex subunit 6
NonamEVm000784t1	2544.69	3.38	0.896735	4.55e-05	0.000807	39.729	141.291	403.05	64.8058	957.167	201.391	294.995	666.529	1467.17	395.644	778.394	3845.82	933.732	1127.44	1551.59	16686.8	12233.7	2517.78	2888.89	2060.39	2378.93	4347.89	Collagen alpha-1(IX) chain
NonamEVm000791t1	74.6	-2.87	0.918757	0.000693	0.0058	163.356	92.5854	120.008	119.946	87.0247	83.0998	154.849	52.7103	73.89	166.991	62.5242	74.0262	61.0324	59.9955	54.8078	0	0	135.041	44.219	20.541	0	14.6285	AT-rich interactive domain-containing protein 5B
NonamEVm000795t1	32.27	-3.74	1.27606	0.000507	0.00466	1.78161	15.3429	66.9408	36.0897	60.1036	21.9695	39.5768	21.0751	36.9407	31.0005	24.3154	94.128	42.7393	60.3728	46.8821	0	0	49.8677	58.7108	0	0	2.07185	ATP-dependent DNA/RNA helicase DHX36
NonamEVm000808t1	108.42	-5.07	0.962729	6.22e-09	1.38e-06	119.565	152.42	827.747	109.297	31.0308	180.71	73.8838	43.986	47.8803	38.3362	94.5111	68.1741	174.867	36.1934	45.4759	0	113.873	120.406	89.6197	8.84546	0	8.43086	Ribosomal protein S6 kinase alpha-5
NonamEVm000819t1	65.17	-2.34	0.759558	0.00116	0.00841	123.096	89.9219	80.2062	70.1527	66.0498	119.358	153.093	81.3466	83.2215	137.377	77.4763	79.093	46.9681	62.2099	75.9177	0	0	22.9379	18.2366	18.4942	0	28.5033	Exocyst complex component 4
NonamEVm000837t1	54.09	-3.45	1.04169	0.000222	0.00259	8.24431	85.8029	165.951	135.116	54.4848	78.3224	115.676	43.0905	45.8976	40.4736	20.6731	208.706	33.0513	33.2925	46.1923	0	0	29.5418	32.1685	7.73612	0	5.48404	Bumetanide-sensitive sodium-(potassium)-chloride cotransporter
NonamEVm000843t1	61.42	-3.07	1.02307	0.000868	0.00679	105.297	94.5771	88.6342	57.3425	153.487	102.05	97.4344	35.2524	88.1924	52.3954	81.3409	83.5595	70.4667	70.6456	68.9895	0	0	12.4903	68.2915	20.6865	0	0	Tubulin monoglutamylase TTLL4
NonamEVm000845t1	3926.43	-2.47	0.592711	1.69e-05	0.000403	11131.3	4492.46	3103.84	4793.74	4512.81	4548.4	9960.76	8008.17	4715.46	5384.83	3121.86	3584.27	4246.38	4800.99	3057.03	871.385	444.277	1352.93	1226.06	867.423	673.927	1483.24	Probable RNA-directed DNA polymerase from transposon X-element
NonamEVm000854t1	23.85	-5.22	1.36912	2.93e-06	0.000122	20.3818	30.0282	46.526	42.6777	27.415	54.0259	57.8215	12.3188	30.0694	44.5475	20.5526	46.9372	26.9782	32.1468	12.928	0	0	0	19.3631	0	0	0	Protein mono-ADP-ribosyltransferase PARP11
NonamEVm000865t1	88.8	-3.02	0.951523	0.000516	0.00472	66.0856	62.8055	136.141	43.9181	181.053	96.2574	113.314	64.383	89.0502	111.391	82.8652	248.47	81.4604	104.117	124.417	211.052	0	30.4284	85.5583	6.76718	0	14.151	ATP-dependent zinc metalloprotease FtsH
NonamEVm000878t1	496.48	-3.24	0.994175	0.000331	0.00342	618.558	732.786	311.455	524.787	1435.53	498.152	653.242	327.062	1113.93	589.777	449.702	799.112	343.01	991.454	612.766	256.73	0	301.902	251.484	63.0269	0	48.1664	Heterogeneous nuclear ribonucleoprotein U-like protein 1
NonamEVm000879t1	65.36	-3.69	0.938093	1.78e-05	0.000416	191.195	126.654	67.7329	69.8948	109.298	98.159	71.2126	45.7118	82.2155	84.009	32.9824	54.038	35.9351	91.0198	53.4286	141.235	0	6.25223	58.8796	7.6315	0	10.3882	NA
NonamEVm000880t1	20.87	-3.41	1.06183	0.000318	0.00332	8.74217	50.1452	44.8784	27.3458	55.0729	19.5882	39.7672	8.75555	25.9744	15.3117	34.5717	20.1327	8.48426	34.0785	16.7522	0	0	36.3831	8.53996	4.57614	0	0	Chromosome transmission fidelity protein 18 homolog
NonamEVm000886t1	34.55	-3.21	0.916936	0.000142	0.00186	73.8377	19.8864	32.4891	27.119	62.916	61.2664	58.3432	18.854	39.9647	42.9849	28.037	50.6275	36.3878	53.6668	43.6464	0	0	55.1999	46.6744	5.57605	0	2.65778	DNA polymerase eta
NonamEVm000887t1	197.81	-3.39	0.933353	7.73e-05	0.00118	307.187	220.35	398.645	294.58	237.979	227.111	409.342	105.384	233.613	218.778	78.7034	221.578	626.057	204.441	195.704	62.4228	0	99.4667	152.863	40.1184	0	17.5658	La-related protein 1
NonamEVm000893t1	47.02	-6.02	1.39845	7.98e-08	9.3e-06	32.1217	39.1028	103.592	42.5579	64.834	121.815	81.1051	31.4913	35.3371	30.0957	11.7758	112.832	73.1148	68.0697	35.1002	64.6964	0	27.9233	58.858	0	0	0	AP-2 complex subunit alpha
NonamEVm000899t1	22.5	-3.85	1.48721	0.001	0.00753	0	2.60453	40.605	8.23881	33.5783	16.6843	51.6684	37.564	22.1731	14.0489	4.39952	55.859	45.6584	41.3888	25.7248	69.0613	0	0	25.7752	0	0	0	Tyrosine-protein kinase Fer
NonamEVm000905t1	106.9	-3.66	0.970866	3.49e-05	0.000673	138.149	169.6	172.042	132.951	189.663	221.145	182.372	63.8956	144.423	101.903	26.3658	181.413	129.211	136.552	124.834	0	0	94.3855	118.112	18.0108	0	6.84369	F-box only protein 11
NonamEVm000907t1	270.2	-4.08	0.868979	4.19e-07	3.06e-05	1474.03	712.09	335.752	410.558	211.727	686.73	233.133	80.5509	159.005	278.266	179.13	159.694	252.34	116.859	147.573	54.3005	0	218.579	134.349	40.17	24.2287	35.2284	NA
NonamEVm000910t1	58.11	-4.35	1.05642	3.82e-06	0.000145	57.0345	64.9305	69.8852	67.2212	106.357	47.9721	75.0124	32.3444	62.2475	55.5401	32.2881	59.292	85.4438	79.5213	61.7973	187.812	0	74.8611	54.5624	4.34776	0	0	Ubiquitin carboxyl-terminal hydrolase 45
NonamEVm000911t1	38.89	-5.03	1.51509	2e-05	0.000452	13.1105	60.3501	42.9766	49.999	31.949	67.0981	58.2679	20.0285	22.8217	33.1225	185.464	68.8188	15.2429	8.5478	33.9097	131.61	0	6.55047	5.8116	0	0	0	MAM and LDL-receptor class A domain-containing protein 1
NonamEVm000912t1	27.58	-3.21	1.12525	0.00117	0.00847	23.133	20.9622	35.4251	41.9139	38.791	53.2006	120.084	38.3496	56.3387	72.2326	11.4853	11.4139	21.7304	24.7917	12.5417	0	0	9.75218	5.66406	0	0	8.88484	NA
NonamEVm000920t1	403.83	-2.8	0.840123	0.000363	0.00365	1594.12	795.053	391.953	591.324	283.31	733.766	968.377	529.283	336.854	576.265	352.084	283.192	241.982	402.368	283.631	0	0	132.917	81.8825	59.8482	81.7002	164.283	NA
NonamEVm000923t1	60.51	-4.13	1.07192	1.45e-05	0.000364	32.0582	44.8392	238.557	65.9422	84.7522	67.8542	72.4688	22.5498	55.1578	41.3394	13.5538	62.4138	81.8828	99.8664	51.576	203.373	0	43.6015	40.7588	7.61154	0	1.03667	Ubiquitin-protein ligase E3A
NonamEVm000931t1	53.1	-3.1	0.866832	0.00012	0.00163	111.561	148.061	66.0878	36.5295	42.7969	56.2792	44.8766	86.8664	99.9521	52.79	66.1256	25.7214	41.303	104.86	57.2992	0	0	54.2363	46.3686	7.95174	0	18.5234	GATOR complex protein WDR59
NonamEVm000932t1	35.72	-4.95	1.19164	1.31e-06	6.81e-05	50.2553	69.5765	84.6486	32.4505	56.9211	28.7574	94.8471	48.3727	41.6437	49.46	5.76157	63.2118	28.5642	65.7536	44.991	0	0	13.8779	4.34327	0	0	2.3014	Zinc finger protein 608
NonamEVm000935t1	43.42	-2.71	0.773074	0.000212	0.00251	95.8352	51.5865	70.0054	54.1159	73.2631	115.947	89.3213	28.279	50.2266	51.8402	43.3337	38.7956	22.8448	62.9197	32.8759	0	0	22.4186	26.8333	10.7673	0	14.0013	NA
NonamEVm000937t1	51.52	-2.68	0.851309	0.000731	0.00601	135.124	70.2992	75.9294	45.6591	73.8275	113.837	75.16	27.1143	62.4764	52.7822	29.8911	72.5868	72.6423	54.25	40.1536	0	0	44.0424	55.9212	13.5984	0	18.1389	Brefeldin A-inhibited guanine nucleotide-exchange protein 1
NonamEVm000939t1	96.64	-3.04	0.884303	0.000212	0.00251	148.372	101.554	213.491	210.91	95.1064	198.476	218.713	64.661	74.9758	98.5316	68.751	166.49	62.0069	130.005	119.972	0	0	52.1939	62.9146	30.0396	0	8.96602	NA
NonamEVm000944t1	42.71	-3.95	1.45394	0.000646	0.00552	10.2839	7.88349	25.0414	40.6186	29.8828	63.7498	102.685	19.6091	43.8203	67.8598	32.9887	37.9897	28.8284	29.3993	14.2028	362.904	0	13.9916	7.89503	0	0	0	Kinesin-like protein unc-104
NonamEVm000951t1	190.94	-3.54	0.94906	4.42e-05	0.000793	631.049	267.213	252.419	237.709	172.213	401.424	181.102	69.0786	144.389	159.521	153.847	194.011	193.1	214.488	172.802	314.118	0	230.593	149.332	43.6372	0	18.736	Tyrosine-protein phosphatase non-receptor type 4
NonamEVm000958t1	40.18	-3.12	0.932633	0.000272	0.00297	43.6882	50.8253	52.9652	17.2934	79.5716	19.5874	49.6672	31.5224	50.5946	22.2429	14.5894	72.9653	40.4224	49.8179	76.5715	115.113	0	50.9445	35.2243	6.22135	0	4.23532	NA
NonamEVm000964t1	61.2	-3.08	0.947646	0.00039	0.00386	104.679	79.3161	101.412	73.3941	111.321	103.61	150.348	51.6442	69.4626	100.059	63.8517	81.3979	73.9157	72.1645	54.8514	0	0	0	33.7159	19.9767	0	1.33944	pre-mRNA 3' end processing protein WDR33
NonamEVm000965t1	42.73	-3.01	0.993646	0.000834	0.00661	65.6981	107.46	49.1755	94.215	93.1071	76.4365	64.7822	14.4757	49.8317	44.2752	58.0086	35.6121	27.0262	39.7971	25.3424	0	0	26.2461	51.7701	16.8939	0	0	7SK snRNA methylphosphate capping enzyme
NonamEVm000969t1	44.73	-2.97	0.976483	0.000835	0.00661	57.0199	66.1056	40.751	43.5648	105.129	111.842	62.4166	25.0049	54.6065	34.8871	30.7026	67.1303	45.944	66.7821	49.0289	0	0	68.5668	41.4572	13.0501	0	0	Ribonuclease Z, mitochondrial
NonamEVm000970t1	27.43	-6	1.32841	3.47e-08	5.03e-06	51.5935	53.5778	47.5054	44.8247	25.2938	39.0809	53.3914	16.8486	37.4955	38.0735	33.2021	31.0017	36.5195	22.7448	19.8294	0	0	45.0711	7.32945	0	0	0	Zinc finger C2HC domain-containing protein 1A
NonamEVm000971t1	455.47	-4.66	1.25216	1.07e-05	0.000292	440.037	767.118	442.366	2054.54	100.17	577.149	1530.93	200.948	135.109	437.233	131.142	1705.49	12.7312	116.682	701.946	438.1	0	105.96	99.4626	10.871	0	12.4316	Chorion peroxidase
NonamEVm000989t1	23.19	-3.4	0.952809	9.53e-05	0.00139	26.7658	26.3298	27.6524	14.4045	45.7863	52.3481	27.2208	15.485	26.8773	29.2658	15.0542	42.5861	28.4802	33.6833	33.6406	0	0	37.6741	22.8833	1.45409	0	2.5177	Protein aurora borealis
NonamEVm000991t1	228.72	-3.71	1.01833	5.26e-05	0.000894	85.9298	129.848	389.151	257.319	282.703	593.446	201.194	118.91	79.974	41.6432	32.3349	1506.24	95.9642	132.276	176.637	417.889	53.0931	332.791	77.99	13.1675	0	13.2678	Vacuolar protein sorting-associated protein 4
NonamEVm001000t1	38.96	-4.48	1.26721	2.73e-05	0.000564	12.4727	35.4107	107.7	42.3168	68.7414	75.9042	114.161	15.6854	48.0785	19.3773	7.97309	63.222	64.1149	54.5732	28.9846	0	0	62.3424	33.8485	2.17442	0	0	Catenin alpha
NonamEVm001001t1	33.81	-6.41	1.42562	1.43e-08	2.6e-06	99.2121	77.3258	53.2088	50.0432	61.3427	26.3967	114.489	30.0115	29.1772	49.1495	26.2855	29.9794	30.6916	29.3987	18.966	0	0	0	18.2492	0	0	0	NA
NonamEVm001002t1	108.91	-2.98	0.988684	0.000903	0.00698	86.9721	143.42	127.598	73.1363	362.524	73.6675	95.4479	49.2772	131.514	59.1535	111.522	265.242	219.411	114.997	137.903	155.848	0	24.8559	134.772	21.6418	0	7.21283	Neutral alpha-glucosidase AB
NonamEVm001017t1	25.42	-4.86	1.44799	2.53e-05	0.000533	1.78164	40.1281	46.5683	53.5129	35.1378	69.9049	80.8209	34.3082	29.3502	38.7507	3.18891	33.1393	22.2787	36.5719	15.7694	0	0	0	17.9586	0	0	0	Protein DBF4 homolog A
NonamEVm001019t1	75.52	-4.38	1.39433	0.000109	0.00153	79.3623	39.752	31.8107	34.904	56.4704	136.674	99.2198	27.2288	30.5308	99.5803	29.7948	208.116	106.071	40.8461	35.5291	539.068	0	48.0961	16.9571	0	0	1.49663	Peptidyl-glycine alpha-amidating monooxygenase B
NonamEVm001024t1	30.93	-3.39	1.13584	0.000679	0.00572	8.60648	61.7602	88.5073	58.679	31.3144	7.23159	36.9778	19.0407	35.1389	40.1452	84.8284	59.1848	10.9131	26.0347	35.2203	0	0	30.094	39.7459	0	0	7.10392	NA
NonamEVm001028t1	50.41	-2.93	0.841016	0.000188	0.00229	28.4095	77.7981	147.026	58.486	52.1965	69.1418	120.602	57.2113	81.3886	104.663	55.2294	42.0396	35.4818	61.9035	40.4282	0	0	21.5358	32.1306	7.55166	0	15.727	Sarcosine dehydrogenase, mitochondrial
NonamEVm001029t1	402.35	-2.88	0.987073	0.0013	0.00914	609.768	760.501	515.978	520.856	453.291	606.768	628.58	307.533	680.149	901.236	431.336	217.316	343.797	525.227	316.008	458.095	0	182.429	223.038	105.383	0	64.4718	Protein O-GlcNAcase
NonamEVm001030t1	187.15	-3.85	1.01798	2.62e-05	0.000546	1060.17	676.848	280.451	661.807	86.3965	291.595	70.3876	45.1944	87.2876	200.1	215.759	23.3382	61.898	38.6959	44.5659	0	0	164.401	27.7827	14.4429	26.844	39.3487	NF-X1-type zinc finger protein NFXL1
NonamEVm001038t1	26.53	-4.42	1.45414	0.000132	0.00176	3.76814	28.6808	32.0065	30.8909	35.0093	0	80.3937	19.9512	74.368	48.0498	30.8775	44.076	21.8012	48.8908	18.2078	0	0	45.6664	21.0415	0	0	0	NA
NonamEVm001042t1	26.27	-3.58	0.995532	7.06e-05	0.00111	61.845	50.0843	23.851	37.2065	37.7502	46.8132	58.9797	23.178	25.8346	34.9018	33.6768	9.88578	20.1961	69.5421	14.1501	0	0	12.0128	12.1308	0	0	6.00404	NA
NonamEVm001048t1	50.71	-3.16	0.825138	4.38e-05	0.000787	98.5842	91.8494	66.1893	70.8439	92.5442	125.81	69.449	34.3321	60.5856	33.3825	69.5753	44.1225	54.015	65.4179	56.7166	0	0	15.3527	46.6121	7.42855	0	12.8356	NA
NonamEVm001057t1	90.92	-6.03	1.41232	9.24e-08	1.04e-05	95.1455	101.866	135.131	94.8263	144.361	209.845	135.687	63.815	142.163	104.543	50.7504	109.197	65.4133	119.886	96.8961	236.353	0	31.3736	62.1801	0	0	0.893657	NA
NonamEVm001073t1	166.88	-3.12	0.984053	0.000484	0.00449	286.117	274.721	264.556	205.257	189.084	338.988	226.87	110.965	180.66	230.668	97.0721	215.13	260.095	226.162	139.256	201.385	0	42.1297	122.167	56.5021	0	3.57511	Rab GTPase-binding effector protein 1
NonamEVm001079t1	104.94	-4.67	1.06706	8.23e-07	4.9e-05	29.2271	99.6603	399.471	185.007	102.401	255.968	200.883	82.1106	105.729	87.4557	79.6274	154.634	82.1035	123.835	84.5202	158.121	0	6.29425	62.0101	6.59538	0	3.00096	Fasciclin-2
NonamEVm001080t1	209.01	-4.3	1.23656	4.44e-05	0.000794	1351.83	1281.46	315.669	659.427	56.7058	85.8272	38.734	13.2345	25.3006	92.3605	393.433	17.8294	45.9376	19.1586	30.2614	0	0	18.6888	93.9445	29.3557	0	29.0204	Hemocytin
NonamEVm001092t1	88.01	-3.51	1.01612	0.000126	0.0017	171.703	105.672	153.871	154.721	113.696	179.327	135.405	56.9578	114.072	125.9	66.7669	46.8784	31.5946	77.9219	70.4267	0	0	249.232	59.7807	17.5368	0	4.67284	Squamous cell carcinoma antigen recognized by T-cells 3
NonamEVm001097t1	31.14	-20.84	2.12915	3.37e-23	8.2e-20	0	0	128.31	12.7868	36.6553	69.6354	81.6904	39.8477	39.3576	25.6554	0	73.8774	21.7823	89.6295	39.6331	0	0	0	26.1898	0	0	0	AP-1 complex subunit gamma-1
NonamEVm001100t1	29.76	-3.97	1.18621	0.000109	0.00153	81.8831	28.7716	30.2265	64.0289	37.2019	39.73	26.6888	16.1379	35.7254	33.5528	43.9326	10.1414	16.5568	32.0668	20.674	0	0	117.336	16.3287	0	0	3.67831	NA
NonamEVm001102t1	136.55	-4.57	0.926683	6.93e-08	8.27e-06	250.091	298.459	144.874	275.826	198.704	242.262	288.952	73.7578	206.88	200.398	188.906	144.935	70.7436	174.358	110.314	18.0159	0	28.7127	71.4271	15.4529	0	0.981267	Microsomal triacylglycerol transfer protein
NonamEVm001104t1	504.62	-2.82	0.846535	0.000358	0.00362	1545.53	881.634	610.04	572.133	966.853	529.869	541.249	277.819	634.669	555.256	431.125	564.805	415.301	515.432	543.053	257.71	0	390.125	541.195	91.77	168.99	67.1129	Importin subunit beta-1
NonamEVm001110t1	924.99	3.05	1.04558	0.00114	0.00834	5.47547	71.5258	437.567	237.919	151.757	42.3908	659.142	667.193	917.828	534.34	112.862	1013.6	1350.39	1378.78	1036.14	197.527	406.184	605.6	3631.6	3426.86	668.001	2797.09	NA
NonamEVm001112t1	56.34	-2.87	0.917693	0.000694	0.0058	183.069	167.452	37.1452	53.3409	85.7299	48.079	110.876	29.9513	67.1615	72.323	98.7062	35.1933	38.7834	94.0396	46.5584	0	0	7.16419	26.9278	25.1641	0	11.8202	Serine/threonine-protein kinase ATR
NonamEVm001133t1	27.98	-3.58	1.05522	0.000146	0.0019	60.2609	42.7989	17.8988	31.5876	24.1485	27.6199	68.0456	9.80637	72.1231	21.9075	22.6156	25.2504	39.7281	45.6867	42.1267	0	0	37.5722	21.2787	2.63405	0	2.5161	WASH complex subunit 5
NonamEVm001135t1	164.26	-3.14	0.983202	0.000436	0.00416	304.684	227.587	178.841	208.372	291.579	184.937	160.225	76.4422	189.729	148.014	262.89	207.659	494.842	112.759	137.172	94.6341	0	137.122	145.024	46.0343	0	5.22356	Protein transport protein Sec23A
NonamEVm001139t1	59.92	-2.84	0.934898	0.000927	0.00712	96.5162	75.7955	104.209	54.427	124.311	64.0888	61.0796	34.4373	71.6051	77.1395	61.2094	77.1974	73.045	62.1135	75.2526	0	0	137.518	42.2908	20.7336	0	5.20192	Histone acetyltransferase KAT2A
NonamEVm001141t1	55.43	-4.69	0.935532	4.12e-08	5.63e-06	159	125.038	74.1772	101.509	101.477	134.507	75.2496	33.2519	76.7271	74.1707	62.7551	40.5887	29.5698	40.9094	45.3054	0	0	0	37.984	4.07398	0	3.09068	Enhancer of polycomb homolog 1
NonamEVm001142t1	37.38	-2.91	0.910365	0.000529	0.00481	15.1014	42.2375	82.4173	43.3648	41.2187	114.474	57.8653	34.1187	34.3118	38.6613	11.6369	71.0153	54.2393	67.308	43.8351	0	0	30.4251	27.9693	9.21339	0	2.92624	Protein FAM91A1
NonamEVm001144t1	47.06	-3.01	1.02037	0.00107	0.00791	38.9472	49.9445	91.0982	32.0463	68.1657	47.5143	47.6056	32.7002	30.1461	19.7509	8.31818	67.647	75.6962	34.0091	41.8809	144.61	0	115.205	76.7302	13.3974	0	0	Cell division cycle protein 27 homolog
NonamEVm001146t1	28.37	-5.16	1.37986	4.21e-06	0.000154	19.8492	36.8249	38.8316	42.4162	49.674	72.0233	81.3991	17.3406	54.6167	42.664	15.7016	21.9686	34.5766	46.2113	17.0562	0	0	0	33.0285	0	0	0	Uncharacterized protein C1494.07
NonamEVm001161t1	99.57	-3.5	1.17536	0.000603	0.00526	74.6909	74.5683	72.0334	74.2717	166.675	81.5589	154.88	82.0092	136.881	165.052	42.644	131.505	154.916	97.6035	91.4765	534.948	0	20.1896	26.268	8.43983	0	0	Neogenin
NonamEVm001163t1	139.29	-3.36	0.995328	0.000196	0.00237	87.9765	326.744	48.5952	155.429	295.764	439.215	87.8356	112.788	140.596	231.604	132.261	174.877	380.266	65.37	190.05	77.2964	0	14.7588	75.403	11.2852	0	16.1571	Protein O-mannosyltransferase 1
NonamEVm001201t1	43.64	-7.15	1.6779	6.09e-09	1.38e-06	135.75	271.082	79.6384	73.4771	20.5478	14.7466	16.5462	3.95139	16.3711	43.1097	163.677	14.4082	14.5314	11.6039	9.44814	33.0564	0	19.7255	18.3278	0	0	0	Transient receptor potential cation channel subfamily A member 1
NonamEVm001202t1	31.98	-3.42	0.798208	5.02e-06	0.000173	61.738	63.5162	18.0464	56.9552	46.2917	41.3287	59.6702	23.5197	66.3219	41.2689	29.125	17.5738	38.8112	31.5146	33.8458	0	22.3066	25.7519	17.1495	5.62395	0	3.21831	NA
NonamEVm001228t1	26.48	-3.54	1.22726	0.000758	0.00617	2.00395	24.8113	109.678	17.8373	34.9374	40.4015	41.366	17.8051	39.4662	8.02602	8.0772	72.4676	78.7036	29.9683	25.8875	0	0	0	26.3561	3.67267	0	1.16774	V-type proton ATPase 116 kDa subunit a 1
NonamEVm001234t1	39.14	-4.31	1.61007	0.000373	0.00373	0	10.7339	77.2303	46.9332	38.6871	29.7306	44.3379	25.4225	32.1428	27.881	0.805664	113.635	54.7665	58.9798	27.2063	252.989	0	0	19.5451	0	0	0	NA
NonamEVm001236t1	20.76	-3.46	1.15256	0.000595	0.00522	50.2781	28.7473	15.0148	15.306	26.3977	72.3062	44.4623	14.799	27.7354	20.9797	3.23702	54.8224	26.6153	12.5721	34.4918	0	0	0	4.67455	0	0	4.2081	Furin-like protease 1, isoform 1-CRR
NonamEVm001243t1	217.76	-4.27	1.00196	2.3e-06	0.000102	330.341	274.678	97.0965	242.072	205.984	987.29	129.348	36.9829	100.889	120.445	217.784	146.362	776.31	64.6266	84.4303	490.049	153.716	197.9	114.892	6.68881	0	12.756	Venom dipeptidyl peptidase 4
NonamEVm001247t1	1135.18	-2.11	0.534014	4.88e-05	0.00085	1954.44	1270.44	1127.38	1165.22	1964.61	1398.85	1928.53	1248.48	1949.53	2062.27	864.141	1339.23	1257.2	1094.34	1098.55	583.507	634.34	485.206	620.066	432.292	90.6584	404.777	Far upstream element-binding protein 2
NonamEVm001253t1	28.73	-4.21	1.42548	0.000236	0.00271	3.26402	5.37862	42.4366	37.1525	102.493	36.5685	43.8905	12.2984	35.2324	17.1682	24.9959	88.1567	73.0836	39.3801	28.6342	0	0	0	41.9018	0	0	0	Probable ATP-dependent RNA helicase DDX27
NonamEVm001255t1	36.6	-3.9	1.4813	0.000852	0.00671	12.3589	30.4078	1.52142	1.2332	149.594	95.0172	107.301	32.5357	87.2459	85.1085	9.08411	55.4634	32.4314	27.0327	65.8772	0	0	0	13.0029	0	0	0	Probable G-protein coupled receptor Mth-like 10
NonamEVm001276t1	29.65	-3.76	1.25753	0.000417	0.00404	9.04351	7.95585	69.8815	24.1916	80.7453	13.0204	63.3868	26.6955	56.3853	46.8054	14.7148	54.1704	55.9018	43.5766	43.119	0	0	14.6745	25.8427	2.21906	0	0	Polynucleotide 5'-hydroxyl-kinase NOL9
NonamEVm001277t1	74.73	-2.78	0.9167	0.000997	0.00751	247.048	151.508	108.583	98.593	91.375	148.364	101.445	36.9474	67.163	80.0848	118.337	54.4106	64.8427	50.5593	70.0427	0	0	74.4297	28.0741	45.1897	0	6.98202	Kanadaptin
NonamEVm001283t1	186.16	-2.76	0.728383	6.72e-05	0.00107	383.72	369	206.483	231.693	332.466	241.813	224.706	89.1067	197.596	187.31	129.274	195.833	252.528	258.57	182.397	0	44.0302	235.545	214.1	46.3417	61.7461	11.2557	NA
NonamEVm001289t1	923.1	-4.29	0.720451	3.51e-10	1.16e-07	5720.02	3556.8	813.68	2752.62	468.388	845.489	847.692	409.329	469.194	741.575	940.273	340.077	259.524	397.017	368.427	111.777	169.832	245.471	460.151	90.2216	144.23	156.333	NA
NonamEVm001302t1	755.69	4.67	1.13818	2.54e-06	0.00011	5.34559	1.18066	42.2013	110.796	635.284	47.9049	183.769	81.4467	74.948	164.202	6.7822	75.8739	324.253	12.2037	141.63	2175.81	235.13	7095.79	2451.77	622.539	964.488	1171.89	NA
NonamEVm001304t1	35.35	-4.6	1.52659	0.000103	0.00147	47.01	27.5529	13.8319	33.0197	25.2169	230.94	33.6806	10.7268	26.8198	30.3606	13.7164	27.9428	0.480838	26.3811	40.2811	165.306	0	13.1602	11.2147	0	0	0	NA
NonamEVm001309t1	125.53	-3.93	0.881026	1.42e-06	7.19e-05	569.327	407.78	91.1016	191.077	86.6877	120.201	77.1054	42.8971	91.4541	86.6424	77.5396	149.014	70.0815	114.105	86.5656	258.785	0	109.225	85.9663	23.2571	8.80813	14.0961	GAS2-like protein pickled eggs
NonamEVm001312t1	48.48	-5.94	1.38639	1.06e-07	1.12e-05	49.9068	80.2758	32.0329	58.5064	124.229	85.9681	113.352	47.5273	105.758	76.8392	37.4648	50.089	34.5298	84.1487	67.3271	0	0	0	18.6445	0	0	0	NA
NonamEVm001325t1	49.87	-3.09	0.993688	0.000598	0.00523	54.7979	63.7444	61.6552	18.3452	84.316	65.0591	123.773	65.9146	77.6117	106.488	35.9012	49.2351	84.1926	89.1881	62.3542	0	0	0	41.8191	9.83099	0	2.80967	Ca(2+)/calmodulin-responsive adenylate cyclase
NonamEVm001341t1	43.68	-2.8	0.909821	0.000854	0.00671	20.3586	64.0704	51.2676	42.6675	95.2693	74.1368	60.6416	55.5734	45.7959	60.604	26.2034	72.6363	35.968	61.5074	64.4631	0	0	47.4641	69.2365	6.21533	0	6.92943	Cell division cycle 5-like protein
NonamEVm001348t1	43.21	-4.93	1.30547	5.72e-06	0.000189	40.9649	22.4204	72.734	65.9446	111.26	65.8625	152.024	17.6479	23.7843	23.8998	23.9189	131.236	44.1258	35.9989	47.3145	0	0	43.6041	26.9428	0	0	1.03666	Probable G-protein coupled receptor 158
NonamEVm001354t1	47.03	-3.16	1.05337	0.000802	0.00642	33.8399	40.1191	64.0056	22.3954	104.782	33.9307	92.4608	37.7432	63.2515	56.1916	17.9377	139.574	88.6931	87.666	52.4249	0	0	6.22944	84.9651	4.34904	0	4.14588	Nucleolar complex protein 2 homolog
NonamEVm001358t1	96.64	-3.48	1.01928	0.000155	0.00199	29.108	132.019	69.598	128.803	234.879	85.3682	253.301	151.113	177.783	304.194	99.1353	63.9947	49.3263	160.082	105.228	0	0	54.2688	16.3879	0	0	11.5381	NA
NonamEVm001373t1	5021.86	-4.36	1.08627	5.65e-06	0.000187	23840.8	16618.1	3290.68	7781.3	2391.47	22570.1	2810.08	1021.75	911.329	3454.29	7172.18	4498	122.677	685.841	1341.74	6023.93	3814.72	599.124	469.618	139.268	163.864	760.007	Chorion peroxidase
NonamEVm001377t1	32.39	-5.81	1.81916	5.21e-06	0.000177	111.67	121.733	121.174	118.642	2.366	80.9903	6.88372	17.5903	2.72007	3.9692	119.604	4.06342	0	0	0.654794	0	0	0	0.530678	0	0	0	Scavenger receptor class A member 5
NonamEVm001392t1	99.32	-2.66	0.875585	0.00106	0.00789	120.661	218.382	133.767	122.798	135.555	166.249	128.167	35.5463	126.764	105.959	86.8249	138.68	171.195	131.315	102.884	0	0	126.7	75.4783	16.8191	37.2222	4.00496	Protein zer-1 homolog
NonamEVm001397t1	823.48	-4.77	1.41541	2.84e-05	0.000578	4531.7	1445.1	935.098	3229.38	170.845	4649.98	562.372	45.8964	61.9306	273.913	398.117	478.533	18.0294	22.8746	109.369	1031.48	0	69.1884	15.9026	6.04085	0	60.7509	Chorion peroxidase
NonamEVm001399t1	987.96	-2.68	0.602385	4.27e-06	0.000156	1135.3	1137.22	1287.8	1140.37	1700.8	1479.11	1188.49	438.782	974.027	1080.19	774.361	1482.53	1325.84	1002.81	977.026	1931.02	237.549	883.374	1068.96	264.851	103.445	121.154	Eukaryotic translation initiation factor 4 gamma 2
NonamEVm001405t1	69.76	6.16	3.82606	6.92e-05	0.00109	0	0	0	0	48.0261	0	524.361	110.985	472.496	241.974	0	9.16048	0	76.3117	44.1805	0	0	0	4.08886	0	0	3.07058	Myosin heavy chain, muscle
NonamEVm001406t1	70.38	-2.83	0.959666	0.00125	0.00894	35.6416	73.2061	132.29	78.7423	230.391	71.994	94.3772	33.2604	87.7839	42.1412	106.3	108.278	139.595	85.8594	58.2761	0	0	96.0799	51.9904	15.667	0	6.53371	Ribosomal RNA processing protein 1 homolog B
NonamEVm001421t1	59.43	-2.69	0.870711	0.000893	0.00693	66.4961	90.3139	71.7675	85.2235	53.3319	69.8017	113.045	60.2286	89.2638	77.3588	48.6895	51.3971	54.0036	60.6514	43.4807	0	0	216.874	28.947	9.49316	7.18891	9.86604	NA
NonamEVm001422t1	195.2	-3.18	1.11114	0.0012	0.00865	44.5283	154.589	621.735	160.48	190.695	302.092	528.015	159.811	241.198	235.256	18.7241	369.6	158.606	283.389	184.856	265.897	0	213.622	111.209	43.7987	0	6.25837	Actin-binding LIM protein 1
NonamEVm001432t1	85.37	-4.59	0.969226	1.77e-07	1.61e-05	111.228	231.579	71.9673	96.0474	220.278	132.421	99.769	45.0905	145.285	123.744	133.677	54.7443	57.853	96.3789	101.262	0	0	91.4347	56.3051	5.54578	0	3.57177	Cyclin-F
NonamEVm001434t1	49.69	-3.57	1.28134	0.000933	0.00715	3.57064	10.6467	542.774	8.73125	8.65185	13.8376	55.4134	21.1396	28.4032	14.742	3.95115	68.2648	24.6418	25.6204	24.7916	62.7355	0	148.577	8.31349	15.2673	0	3.1203	NA
NonamEVm001436t1	20.37	-3.89	1.37128	0.000533	0.00482	3.02847	7.67231	22.3591	60.6703	27.6428	48.043	41.045	29.622	20.4757	49.3899	4.46091	24.8356	22.0366	6.76356	12.304	53.2605	0	0	14.5329	0	0	0	NA
NonamEVm001452t1	32.22	-4.24	1.48519	0.00029	0.00311	1.90872	16.2527	120.545	21.3843	25.8168	18.8045	137.357	29.0356	69.3651	47.7033	3.75518	44.9927	30.1561	89.5071	36.4615	0	0	0	14.1963	0	0	1.69011	Rapamycin-insensitive companion of mTOR
NonamEVm001453t1	4407.95	4.21	1.54426	0.00041	0.004	0	0	315.343	934.492	55.774	0	803.176	748.287	477.569	598.555	81.2092	395.705	780.391	2498.02	885.649	48144.9	38.665	9597.74	2128.18	4956.78	22785.1	749.298	Disorganized muscle protein 1
NonamEVm001462t1	67.71	-4.12	0.998	5.02e-06	0.000173	131.743	123.913	64.7984	88.0868	65.1675	181.732	87.4293	37.026	68.029	76.2365	63.0298	46.5095	21.6571	35.1815	47.7782	142.58	0	179.487	19.3786	6.60778	0	3.15038	NA
NonamEVm001465t1	57.12	-3.92	0.939367	5.16e-06	0.000177	128.271	89.6876	117.874	93.3262	120.805	253.689	64.1509	19.1089	56.1584	51.0079	60.9731	71.8157	13.1795	27.856	68.1742	0	0	0	7.59569	9.78075	0	3.10604	Annulin
NonamEVm001477t1	27.08	-4.05	1.0895	2.63e-05	0.000546	48.2971	59.1199	30.3914	57.4464	34.9224	62.8639	42.0654	25.1442	32.5119	31.2116	20.6058	24.45	17.0327	36.2975	34.8801	0	0	0	34.9425	3.49577	0	0	NA
NonamEVm001481t1	35.41	-2.8	0.778302	0.000137	0.00182	37.2532	53.8464	73.303	57.96	35.4502	53.1425	68.2814	21.4327	42.8112	49.7302	27.6612	39.4182	44.5255	38.9327	58.7973	0	0	29.6181	29.8711	7.23427	0	9.85	Kinesin-associated protein 3
NonamEVm001494t1	66.18	-3.59	1.07843	0.000179	0.0022	64.0947	44.7026	83.0759	94.1359	78.6209	41.5726	126.017	28.1144	79.6235	114.033	55.8852	53.7444	50.9277	72.6012	49.6627	309.217	0	58.9783	43.1904	0	0	7.85807	Endoplasmic reticulum membrane-associated RNA degradation protein
NonamEVm001500t1	20.39	-5.22	1.31268	1.56e-06	7.74e-05	23.6892	24.0494	39.986	22.065	48.916	19.4675	32.4992	4.78121	15.2557	20.0455	26.3721	60.444	34.243	21.6223	33.0512	0	0	11.0806	11.0257	0	0	0	Cyclic AMP-dependent transcription factor ATF-6 beta
NonamEVm001502t1	75.8	-5.13	1.20162	5.81e-07	3.85e-05	378.836	169.328	71.0805	79.0975	30.1747	212.557	299.844	23.808	42.0513	156.606	18.2768	107.559	28.4528	14.1272	20.8388	0	0	0	8.5406	4.5715	0	1.79387	Retrovirus-related Pol polyprotein from type-1 retrotransposable element R2
NonamEVm001503t1	36.97	-3.55	1.34463	0.00139	0.00963	61.1817	43.0101	240.584	11.2608	31.5763	204.452	4.45463	8.97814	11.9043	3.72207	9.18767	54.887	12.3642	28.351	22.8879	0	0	0	50.7668	0	0	13.8455	Low-density lipoprotein receptor
NonamEVm001504t1	44.35	-4.03	1.06647	2.15e-05	0.000475	24.2119	38.6885	98.3682	125.835	76.6728	40.6648	72.1166	32.5799	39.6488	48.8749	20.9557	38.2551	65.5619	53.7393	47.0037	121.682	0	0	26.3374	2.77456	0	1.76502	ESF1 homolog
NonamEVm001505t1	44.03	-3.26	1.09507	0.000786	0.00633	31.39	29.9034	80.5151	19.495	57.6388	77.7655	74.717	30.7407	70.1706	36.1141	16.4276	77.7043	16.2927	72.4379	31.4321	148.677	0	54.8614	34.7291	0	0	7.67525	Protein abrupt
NonamEVm001514t1	305.35	-2.8	0.872401	0.000545	0.0049	626.791	302.308	1126.43	225.605	191.207	393.784	325.526	228.852	260.853	249.833	147.195	251.063	267.48	434.702	243.85	300.646	0	332.713	589.39	116.003	53.2405	50.1481	F-actin-uncapping protein LRRC16A
NonamEVm001515t1	22.96	-4.29	1.28567	7.08e-05	0.00111	41.2977	15.6099	24.5261	32.9692	65.0136	42.9914	33.9042	19.3461	34.5584	28.9372	17.2321	29.7485	29.6706	35.4814	31.2911	0	0	0	21.2958	1.14742	0	0	Ribosome biogenesis protein SPATA5
NonamEVm001519t1	104.42	3.02	0.878542	0.000208	0.00247	28.0922	30.8399	29.5102	34.5402	121.772	54.1817	118.158	73.9556	88.2553	120.601	25.3336	89.7194	69.9477	83.4391	117.318	57.6535	0	44.9612	120.81	736.079	105.626	146.354	Centromere/kinetochore protein zw10 homolog
NonamEVm001529t1	46.6	-5.78	1.44622	4.49e-07	3.22e-05	48.3147	47.5487	68.9179	35.7115	88.9664	46.5834	86.8873	43.9502	73.9677	110.284	30.9466	70.1775	41.7066	93.5712	81.9572	0	0	0	55.8169	0	0	0	NA
NonamEVm001530t1	36.02	-4.23	1.27836	8.53e-05	0.00127	14.829	46.151	37.1037	52.4559	64.4309	45.1094	39.8815	15.844	47.8869	127.981	32.1153	18.5409	16.1442	53.3579	24.5147	92.8475	6.11516	40.3807	14.4694	0	0	2.31513	General transcription and DNA repair factor IIH helicase subunit XPD
NonamEVm001533t1	88.15	-2.59	0.86452	0.00127	0.00903	193.632	163.219	114.018	112.363	117.168	126.555	124.205	56.6549	114.32	118.25	87.4532	114.388	125.466	95.4302	90.1709	0	0	52.1289	75.6808	39.7457	0	18.3899	ADP-ribosylation factor-binding protein GGA3
NonamEVm001534t1	40.68	-2.69	0.856877	0.000766	0.00621	46.3213	95.6004	55.3759	41.5763	52.5057	97.7672	49.339	18.6473	44.0783	62.3682	34.7117	52.1527	50.0164	44.1724	38.5734	0	0	63.6385	26.2775	15.8717	0	6.05603	Exonuclease 3'-5' domain-containing protein 2
NonamEVm001535t1	20.08	-3.75	1.36558	0.000807	0.00645	8.36639	7.22982	14.6407	14.2894	34.8412	22.8637	43.1965	53.5764	65.4811	34.419	4.16161	39.5946	21.9865	22.2255	33.8183	0	0	0	21.1549	0	0	0	Ankyrin repeat domain-containing protein 12
NonamEVm001536t1	33.69	-5.26	1.34438	1.85e-06	8.72e-05	81.3948	54.7987	51.744	80.4384	50.8848	33.5253	67.404	38.7483	41.2868	36.0802	25.1012	36.9946	23.9978	60.2363	24.4271	0	0	0	32.9754	1.10433	0	0	Protein phosphatase 1 regulatory subunit 21
NonamEVm001547t1	22.04	-3.05	0.964785	0.000523	0.00477	62.7823	41.2601	17.9031	40.0591	37.5112	20.964	32.6927	19.0434	50.2486	25.8533	7.50756	19.1446	8.46535	36.1686	24.4296	0	0	19.1962	12.6616	7.85502	0	1.07221	X-linked retinitis pigmentosa GTPase regulator-interacting protein 1
NonamEVm001553t1	24.81	-4.44	1.34297	6.13e-05	0.00101	6.23546	39.6578	46.9586	30.6492	36.9975	13.5661	49.7267	17.4849	33.0175	29.977	11.879	50.8268	38.239	59.1763	57.6604	0	0	0	22.8808	0	0	0.880115	FHF complex subunit HOOK interacting protein 2B
NonamEVm001555t1	468.7	-5.46	0.910368	4.96e-11	2.26e-08	233.437	1297.57	4566.84	402.11	181.332	341.383	360.05	78.4953	98.745	79.5088	186.699	742.695	379.742	169.673	201.339	469.605	79.4106	218.082	141.037	22.8529	56.6028	4.15093	Hemocyte protein-glutamine gamma-glutamyltransferase
NonamEVm001556t1	430.66	-4.07	0.985839	5.16e-06	0.000177	1053.28	867.331	481.66	485.12	627.047	561.46	523.476	190.096	342.576	497.121	769.843	616.167	908.543	296.181	423.006	202.798	0	310.7	235.529	21.6784	0	60.9462	Cyclic AMP-responsive element-binding protein 3-like protein 4
NonamEVm001558t1	67.16	-3.32	0.932412	0.000105	0.00149	70.1585	69.5263	77.5713	78.184	135.26	65.7749	66.3787	28.3523	77.3183	51.5639	58.6011	60.2489	92.2899	63.4749	55.6927	249.961	0	112.581	50.9762	4.63968	0	8.86101	RNA-binding protein NOB1
NonamEVm001572t1	468.47	3.87	0.691543	4.37e-09	1.06e-06	17.9241	47.5137	171.941	137.665	265.551	313.057	279.481	357.109	289.913	268.59	160.609	343.2	210.273	348.976	303.474	377.975	392.127	538.655	1076.01	2581.24	833.664	991.43	BAG domain-containing protein Samui
NonamEVm001582t1	345.15	-4.69	0.883851	8.96e-09	1.84e-06	1175.2	716.928	222.822	683.066	407.058	542.644	669.752	269.968	493.503	349.703	304.413	283.348	450.969	539.154	294.095	0	0	65.3344	71.1763	3.92159	38.8008	11.4517	Influenza virus NS1A-binding protein
NonamEVm001586t1	52.96	-2.78	0.897186	0.000811	0.00646	85.9175	87.3446	121.1	55.1283	97.3663	108.098	42.8898	28.2766	46.6078	20.8947	115.811	74.5973	70.1382	43.4691	65.1261	0	0	30.6474	41.7954	8.84836	0	21.1029	Vesicle-fusing ATPase 1
NonamEVm001590t1	28.21	-4.62	1.59203	0.000129	0.00173	19.1786	37.1019	49.3852	61.8392	60.7364	2.14815	174.558	28.2913	62.1585	82.358	2.21204	21.4632	0	5.36982	13.7762	0	0	0	0	0	0	0	Sodium-dependent serotonin transporter
NonamEVm001591t1	36.08	-5.63	1.5177	1.71e-06	8.2e-05	219.14	137.276	85.4347	95.049	9.45562	24.4932	48.0322	1.71886	12.3054	51.5976	36.5828	9.52545	21.9317	4.58068	12.3303	0	0	0	22.1168	0	0	2.20459	NA
NonamEVm001594t1	21.31	-3.77	0.910296	7.04e-06	0.000216	42.1074	25.5042	46.4699	31.3459	35.5027	35.0216	32.8971	23.8836	28.2141	32.7183	22.4534	12.0937	10.9413	16.1234	20.9929	0	38.0168	0	10.2802	0	0	4.35557	NA
NonamEVm001597t1	197.7	6.94	1.39043	3.68e-10	1.2e-07	0	0	5.07392	6.28185	19.6132	19.1192	86.6289	128.607	103.487	129.654	11.71	297.67	223.467	444.563	256.845	95.5831	0	188.002	284.105	1067.17	391.339	590.48	NA
NonamEVm001608t1	293.19	-3.36	0.932027	8.48e-05	0.00127	1575.24	813.54	216.94	638.599	183.432	1042.94	324.19	169.664	218.877	305.78	72.8209	268.928	104.58	77.1406	123.895	0	0	70.5464	72.2439	28.7356	98.4544	43.5576	Retrovirus-related Pol polyprotein from type-1 retrotransposable element R2
NonamEVm001612t1	79.57	-3.51	0.908625	2.84e-05	0.000578	255.859	221.983	147.452	139.235	102.509	253.601	69.3941	22.5279	61.3428	37.7637	45.0046	81.6486	62.9889	69.4831	66.2684	0	0	26.281	48.3536	14.9092	23.8672	0	Tyrosine-protein phosphatase non-receptor type 9
NonamEVm001617t1	72.15	-3.62	1.29446	0.000868	0.00679	13.1219	19.3224	211.998	62.0018	37.958	79.2435	39.4128	32.5863	32.923	21.1365	17.8393	160.91	16.3644	25.9247	40.1652	288.179	0	467.932	12.731	7.50369	0	0	NA
NonamEVm001625t1	431.22	-3.04	1.021	0.000945	0.00722	910.321	752.441	735.145	435.48	475.071	1643.9	497.628	246.818	300.186	319.748	437.107	479.11	330.687	343.977	388.191	186.687	0	458.646	362.544	133.19	0	50.0298	Inhibitor of apoptosis protein
NonamEVm001655t1	47.97	-6.24	1.43041	3.71e-08	5.19e-06	54.4834	65.7386	90.4157	70.5452	83.3271	151.006	103.441	33.7166	48.7307	43.1887	12.772	58.848	56.7558	18.7036	43.1294	0	0	78.5512	41.9911	0	0	0	Ral guanine nucleotide dissociation stimulator-like 1
NonamEVm001660t1	53.98	-4.79	1.4679	3.74e-05	0.000706	33.9633	49.7834	101.838	170.189	26.5205	80.5053	37.55	10.3668	16.5357	16.7634	6.02879	36.1817	30.7621	21.7667	17.8421	0	0	407.329	122.345	0	0	1.29734	GTPase-activating protein skywalker
NonamEVm001663t1	25.28	-4.45	1.16602	1.06e-05	0.000291	16.2682	38.6983	65.6073	19.7947	21.4939	21.0503	39.8053	33.4921	35.3195	20.4231	42.0968	59.2176	44.5903	22.9554	22.3451	0	0	40.4593	10.6552	1.92717	0	0	Myotubularin-related protein 2
NonamEVm001671t1	59.1	-3.26	0.966252	0.000218	0.00256	50.2207	64.462	38.5198	126.35	155.607	30.9403	126.467	45.0895	87.0143	105.218	129.951	88.8091	27.5836	40.1614	130.822	0	0	33.3443	9.92737	1.96352	0	7.71736	Bestrophin-1
NonamEVm001687t1	100.75	-3.19	1.12974	0.00133	0.00928	33.904	139.504	123.326	135.41	381.266	27.9939	99.836	61.8838	228.256	197.382	22.7657	164.758	6.38065	157.33	186.009	94.0435	0	49.9265	89.5605	8.71537	0	8.3089	Targeting protein for Xklp2 homolog
NonamEVm001700t1	67.03	-4.62	1.17225	5.25e-06	0.000177	40.6545	55.5152	56.8963	35.0701	204.609	131.938	160	55.5987	121.345	117.886	117.563	114.875	36.0876	88.3891	85.9134	0	0	27.9663	22.0609	0	0	2.29423	NA
NonamEVm001703t1	24.32	-3.39	0.940309	8.47e-05	0.00127	76.539	45.9979	45.0634	24.872	56.6857	29.9071	24.1439	9.31307	28.3301	12.9165	42.2468	35.9508	22.2943	23.2223	32.8153	0	0	0	15.1962	5.43648	0	4.1482	Trafficking protein particle complex subunit 11
NonamEVm001704t1	221.4	-2.89	0.979568	0.00117	0.00847	428.258	338.027	203.028	327.433	348.174	256.342	511.671	216.178	397.783	414.578	181.401	154.72	214.454	335.644	220.432	0	0	138.835	97.2402	63.956	0	22.654	RNA-binding protein spenito
NonamEVm001707t1	127.71	-3.85	0.986148	1.67e-05	0.000401	275.593	173.485	155.643	200.01	156.469	266.749	342.297	104.844	174.266	329.286	85.4977	114.858	86.9266	133.919	111.315	0	0	7.01726	66.8596	22.0572	0	2.45487	Phosphatidylinositol-binding clathrin assembly protein LAP
NonamEVm001718t1	83.69	-3.23	0.834107	3.49e-05	0.000673	169.942	175.391	150.33	244.387	76.4389	163.085	70.0216	31.2737	65.3473	56.7924	105.363	77.0493	30.6547	53.468	49.6018	0	172.697	80.2176	31.8709	16.1623	0	21.1092	SH2 domain-containing protein 4B
NonamEVm001723t1	53.15	-3.9	1.11204	6.93e-05	0.00109	26.3905	43.7894	319.704	46.9563	31.6079	158.513	126.112	34.7974	40.1262	35.1406	10.7001	48.7216	17.8083	68.3593	14.6309	0	0	40.7196	92.9597	5.52029	0	6.76158	Phosphatidate phosphatase LPIN2
NonamEVm001725t1	29.39	13.9	4.38299	6.33e-08	7.74e-06	0	0	0	0	0	0	161.427	148.562	80.4253	13.5992	0	6.8754	24.6428	52.3947	49.024	0	0	87.3018	2.0779	8.72273	0	11.4435	Myosin-4
NonamEVm001726t1	23.42	-3.59	0.914172	1.99e-05	0.000452	86.4281	40.4259	25.9106	18.7758	27.1699	23.8039	40.0455	12.56	19.3155	36.1267	19.3502	24.7891	30.7256	29.5365	22.1391	0	0	18.8867	31.7571	4.39891	0	3.07492	Nuclear hormone receptor FTZ-F1
NonamEVm001730t1	41.51	-3.7	1.09487	0.000135	0.00179	16.357	17.341	79.1237	40.943	59.31	134.02	80.4705	26.9017	35.2417	47.8274	17.3405	61.1653	67.8803	50.1535	52.1958	86.2157	0	22.8753	13.9635	3.99632	0	0	Choline transporter-like protein 4
NonamEVm001733t1	42.74	-4.36	1.03951	2.73e-06	0.000116	38.1717	88.4953	90.077	70.8663	40.6148	98.944	117.857	26.9225	71.8107	33.3486	7.82641	52.2706	50.1974	41.9607	45.5332	41.9007	0	11.1329	7.39672	4.85037	0	0	DnaJ homolog subfamily C member 13
NonamEVm001742t1	89.55	-3.49	0.932499	4.47e-05	0.000797	312.957	199.529	104.654	154.486	90.0621	207.88	111.731	35.416	88.3358	128.673	130.811	24.8622	38.5923	83.9113	56.2206	45.916	0	60.1947	59.2839	32.426	0	4.05707	Vacuolar protein sorting-associated protein 53 homolog
NonamEVm001743t1	38.31	-4.14	0.988555	3.78e-06	0.000144	111.592	85.9864	54.6444	42.0631	73.1491	30.1614	58.1451	43.4664	57.2562	45.7647	10.3729	39.9751	27.0121	63.8026	42.1563	0	0	20.7047	29.3919	7.22616	0	0	NA
NonamEVm001764t1	60.23	-3.37	1.03532	0.000295	0.00314	122.954	129.844	100.432	83.3926	50.5549	149.838	58.3334	29.8984	42.0049	38.107	55.4113	68.782	157.764	55.7309	41.344	0	0	68.5889	52.4969	19.5683	0	0	NA
NonamEVm001775t1	24.07	-3.52	1.01058	0.000116	0.00161	43.0949	42.2651	28.7194	30.6495	46.4683	25.0947	30.7821	13.9558	27.6385	4.70372	27.9666	36.1567	31.1212	32.8885	29.4451	0	0	25.8733	47.3754	4.21346	0	1.07973	Integrator complex subunit 13
NonamEVm001779t1	50.71	-4.65	1.45389	5.74e-05	0.000955	5.35254	36.6411	34.975	9.97045	104.259	47.9967	38.7453	39.7629	92.175	60.8231	55.0943	68.4874	102.018	76.4183	69.7741	0	0	224.701	48.4267	0	0	0	E3 ubiquitin-protein ligase TRIM9
NonamEVm001787t1	40.27	-2.66	0.866322	0.000955	0.00728	27.2984	55.2268	77.6039	63.734	97.6821	30.57	72.1464	22.0069	57.9763	39.1126	25.6658	52.7798	58.662	65.8706	52.4756	0	0	47.8326	22.4908	12.1316	0	4.70958	Nucleoporin 88
NonamEVm001798t1	38.09	-4.63	1.46906	6.82e-05	0.00108	6.577	29.8254	42.1062	27.3643	56.9918	40.688	66.2306	20.9176	57.8585	31.2192	2.2763	68.4597	38.9395	37.7711	41.4475	233.894	0	11.5836	23.7892	0	0	0	NA
NonamEVm001806t1	34.66	-3.01	0.927553	0.000424	0.00409	70.8493	110.687	25.1613	37.0791	29.3094	67.3423	45.2553	23.3018	41.1818	28.7908	35.3798	23.1499	39.0085	40.6461	31.6024	0	0	79.6791	17.9122	2.78382	0	13.4309	Protein phosphatase 1H
NonamEVm001815t1	304.62	-2.7	0.738609	0.000119	0.00163	1030.15	499.234	284.465	254.417	321.018	295.343	119.031	145.968	222.892	104.839	338.451	296.195	437.875	323.837	230.071	169.377	96.0021	779.444	524.893	139.346	35.638	53.2565	cGMP-dependent protein kinase, isozyme 2 forms cD4/T1/T3A/T3B
NonamEVm001830t1	372.9	-3.7	1.0547	8.72e-05	0.0013	1187.9	834.608	133.909	444.812	346.328	989.706	471.485	181.864	190.687	270.814	1049.19	804.378	124.313	109.101	305.234	0	337.879	237.038	92.4379	44.6154	0	47.5626	Serine protease hepsin
NonamEVm001836t1	25.78	-5.1	1.33739	3.69e-06	0.000143	44.8496	61.7164	57.526	33.1966	48.5624	39.3313	40.7374	6.42694	30.8403	46.2352	26.8553	9.14859	11.0184	31.5788	18.9109	0	0	50.1463	9.05648	0	0	1.04674	NA
NonamEVm001840t1	90.68	-4.65	1.0695	9.38e-07	5.37e-05	331.848	285.022	90.7844	120.247	109.422	124.562	108.311	41.8559	72.198	110.341	63.4326	38.821	42.9347	70.9825	49.7424	279.078	0	6.0433	36.3525	11.0778	0	2.01173	NA
NonamEVm001846t1	32.12	-3.2	0.981201	0.00033	0.00341	89.2573	63.877	42.2773	17.3314	82.4824	61.9788	24.5786	20.6502	36.4973	10.2076	29.6056	60.9551	61.4168	29.1172	36.6701	0	0	0	26.9795	4.36264	0	8.32341	NADPH--cytochrome P450 reductase
NonamEVm001848t1	40.25	-2.88	0.849877	0.000273	0.00298	73.0209	57.9555	42.9295	37.6438	92.4063	18.9593	81.1565	34.4964	72.1716	70.2363	36.5714	34.8431	53.5279	66.2836	43.9074	0	0	23.5441	29.6206	8.22868	0	8.04125	NA
NonamEVm001850t1	324.29	-3.07	0.827889	7.26e-05	0.00113	459.955	752.639	322.35	546.237	459.029	535.05	760.915	374.419	531.062	431.699	226.206	173.342	330.709	627.622	254.87	0	0	101.042	110.165	69.3723	38.9766	28.7465	Serine/threonine-protein kinase PRP4 homolog
NonamEVm001853t1	38.56	-3.7	0.912024	1.04e-05	0.000285	56.8909	62.5897	50.5413	40.3246	49.7714	90.3422	34.1939	25.5633	56.7135	58.0849	31.1332	52.3288	56.1859	44.0885	34.5789	0	0	45.0526	52.1887	3.37626	0	4.29526	Armadillo-like helical domain-containing protein 3
NonamEVm001875t1	71.86	-4.8	1.21795	3.96e-06	0.000148	138.929	121.552	84.3716	60.972	45.9268	804.228	64.9783	28.9293	39.4777	21.3202	21.1321	31.2174	16.382	21.4879	19.6115	0	0	18.6854	37.3131	4.35053	0	0	NA
NonamEVm001891t1	74.32	-3.61	1.3246	0.00103	0.00774	63.6583	166.646	100.236	180.84	42.6036	130.548	58.3031	39.4452	52.4696	66.4172	23.626	276.526	38.304	8.60345	47.6111	314.482	0	0	15.2039	0	0	9.48783	Laccase-1
NonamEVm001893t1	132.11	-4.43	1.07427	3.32e-06	0.000132	220.861	171.101	104.743	84.6078	387.083	153.704	108.708	82.3461	171.538	120.131	146.689	217.839	493.458	164.877	153.862	0	0	12.4603	101.541	9.78496	0	1.03636	Transmembrane protein 214-B
NonamEVm001899t1	20.6	-4.03	1.25367	0.000152	0.00196	53.6924	52.8623	16.7836	53.8788	8.7427	23.1163	38.1467	11.0797	12.089	40.2078	11.5886	9.88807	24.5819	24.1234	12.0522	0	0	49.4196	7.94861	0	0	2.89904	Coiled-coil domain-containing protein AGAP005037
NonamEVm001917t1	157.75	-3.05	0.990007	0.000696	0.00581	497.115	247.148	119.192	133.01	324.22	227.68	206.852	72.8556	192.968	129.099	126.367	216.61	176.339	188.187	164.107	222.267	0	44.2712	114.941	59.566	0	7.75166	Cyclin-dependent kinase 2-associated protein 2
NonamEVm001922t1	118.46	-3.61	0.940368	2.81e-05	0.000574	282.68	153.71	171.702	118.896	146.902	219.8	193.843	58.0363	82.7591	124.771	40.1045	138.254	140.454	109.439	92.737	222.074	0	206.544	72.5975	25.4576	0	5.39093	Protein Aster-B
NonamEVm001930t1	2714.87	-5.29	1.26854	6.45e-07	4.13e-05	31878.1	16320.6	982.286	3819.27	97.3249	755.116	80.2859	39.3555	89.2457	480.825	2932.69	76.1818	92.2058	124.842	39.8189	477.291	129.262	627.805	250.396	18.7836	48.3295	367.118	Phenoloxidase 2
NonamEVm001941t1	29.93	-4.85	1.31057	8.42e-06	0.000248	53.8687	53.0381	23.1608	50.3273	83.618	36.1325	31.5627	15.6094	27.9041	56.7628	22.9102	44.7619	31.6758	43.0212	34.0637	0	0	12.5591	36.5295	0	0	1.04532	U4/U6 small nuclear ribonucleoprotein Prp3
NonamEVm001965t1	29.47	-3.54	1.19682	0.000613	0.00533	28.141	38.6514	76.0834	47.6817	6.58765	75.5883	21.7988	2.82584	7.81008	9.72373	6.79397	33.1666	28.0067	12.4222	5.84191	135.121	0	94.6861	12.2134	5.22416	0	0	Calcium/calmodulin-dependent protein kinase kinase 2
NonamEVm001970t1	29.61	-5.28	1.65926	1.71e-05	0.000405	47.0462	19.7843	125.127	30.2484	10.0053	197.507	14.1724	4.71394	6.23895	15.17	7.68625	100.874	6.48273	3.89387	8.34245	52.4595	0	0	1.66067	0	0	0	NA
NonamEVm001980t1	30.9	-2.95	0.816729	0.000117	0.00161	59.6036	43.5148	48.7142	34.8929	40.908	52.9846	26.0817	22.6335	32.2041	36.9222	19.478	38.2241	24.3733	55.822	26.3756	28.307	0	48.0265	27.5443	2.80968	0	10.3328	Protein MTO1 homolog, mitochondrial
NonamEVm002009t1	42.09	-3.36	1.06849	0.000426	0.00411	80.0559	66.615	49.7718	69.3986	59.0548	92.6289	42.7437	27.1552	69.166	70.0641	33.2878	18.7764	25.5693	31.6028	36.0919	0	0	128.331	15.5254	10.182	0	0	NA
NonamEVm002018t1	155.36	-4.22	0.659439	2.39e-11	1.22e-08	194.442	158.058	171.819	191.781	181.037	222.168	394.068	158.13	236.254	276.83	112.127	114.855	192.62	166.51	139.238	188.093	86.1457	150.052	63.562	11.9678	0	8.25629	Kinase suppressor of Ras 2
NonamEVm002031t1	25.59	-4.44	1.45019	0.000121	0.00165	21.9882	9.02581	34.4951	22.795	33.1408	11.8869	105.508	36.3519	27.8775	28.3159	1.01582	67.6856	11.5812	44.0644	44.0553	0	0	42.3993	20.8294	0	0	0	Peroxisomal targeting signal 1 receptor
NonamEVm002032t1	36.83	-3.36	0.952905	0.000116	0.00161	93.9678	94.5346	22.7404	34.0369	92.7383	75.6491	38.2507	29.2124	41.5276	32.1821	17.1357	34.0214	20.4404	34.5998	36.228	45.8533	0	0	54.6652	5.31118	0	7.08801	F-box/WD repeat-containing protein 7
NonamEVm002035t1	44.99	-4.14	1.45972	0.000355	0.00359	37.0527	5.66511	95.8722	9.95565	50.0609	31.9374	66.8969	14.5136	32.7741	17.0564	0.318984	112.883	76.4171	37.1681	65.0822	249.645	0	29.9038	54.1639	0	0	2.38368	Putative lipid scramblase CLPTM1
NonamEVm002037t1	58.09	-3.17	0.989246	0.000413	0.00402	14.2466	42.4819	100.347	67.1892	121.141	129.639	65.8044	30.901	68.843	42.6521	22.3331	126.626	63.7483	98.7611	73.7753	78.2271	0	37.3494	82.9433	8.70437	2.26286	0	Cold-inducible RNA-binding protein
NonamEVm002039t1	184.92	-3.39	0.755398	2.18e-06	9.81e-05	479.047	269.54	221.718	168.071	122.602	212.686	292.383	177.015	235.305	398.617	174.93	100.371	156.741	195.694	161.508	112.015	88.2523	345.041	86.7616	23.9093	0	45.9788	NA
NonamEVm002043t1	52.05	-4.4	1.20787	2.13e-05	0.000473	249.311	102.643	10.1812	70.9088	69.9474	159.651	120.348	13.7228	19.2257	96.8682	31.8847	15.0417	80.4944	8.70729	16.194	62.5667	0	0	11.0508	4.34841	0	2.07264	Solute carrier organic anion transporter family member 4A1
NonamEVm002049t1	86.62	-4.31	1.05206	4.31e-06	0.000156	303.673	124.002	98.871	74.4723	170.978	146.542	89.866	34.1179	138.603	112.395	69.3028	76.73	81.4377	120.343	112.525	0	0	64.4912	74.6067	12.7499	0	0	NA
NonamEVm002051t1	95.21	-6.41	1.59078	9.34e-08	1.04e-05	83.7684	33.0561	186.354	450.638	103.278	45.9679	284.215	24.9963	87.0513	72.3386	11.9596	150.348	205.468	49.3438	58.8197	93.9083	0	106.041	46.9702	0	0	0	Epidermal growth factor receptor kinase substrate 8
NonamEVm002052t1	82.49	-4.17	1.09442	1.61e-05	0.000392	164.116	314.288	303.379	128.672	11.2053	376.258	140.754	14.6637	22.8233	56.3052	27.6713	67.6276	39.4912	10.5448	14.3121	0	0	39.8092	61.9466	14.2023	0	6.65589	Protein tramtrack, alpha isoform
NonamEVm002056t1	30.94	-3.83	1.49143	0.00109	0.00803	0	22.9729	19.7388	5.92162	37.0813	88.1468	30.0275	14.0057	46.9219	35.7165	38.5009	29.129	249.363	26.8543	21.1066	0	0	0	15.1315	0	0	0	V-type proton ATPase 116 kDa subunit a 1
NonamEVm002069t1	780.97	-2.34	0.675555	0.000298	0.00316	1601.46	1408.44	558.089	1120.34	1188.05	857.6	759.855	552.646	1231.65	830.192	817.826	1238.96	665.791	806.882	831.443	796.757	255.261	652.249	399.026	175.138	31.0247	402.709	Transketolase-like protein 2
NonamEVm002079t1	29.54	-3.72	0.981336	3.04e-05	0.000606	46.526	118.844	31.8978	73.4503	27.4185	15.0792	30.3334	19.2453	32.8383	46.0137	45.9874	14.8191	15.9482	31.656	16.5904	0	0	62.9451	12.128	3.18418	0	5.07032	Centrosomal protein of 76 kDa
NonamEVm002087t1	116.24	-3.11	0.876297	0.000132	0.00176	186.421	152.116	151.874	126.878	181.608	132.789	139.32	58.1402	156.912	158.448	101.834	119.927	121.062	183.003	168.361	133.157	0	122.252	123.777	30.5123	0	8.83666	HEAT repeat-containing protein 3
NonamEVm002102t1	389.38	3.59	1.22396	0.000624	0.00538	5.95248	13.1511	91.6112	85.1371	58.443	0	93.4947	180.323	297.722	111.927	41.077	738.664	785.081	641.67	394.448	244.115	0	237.823	1569.36	1606.01	114.594	1255.8	Heat shock 70 kDa protein cognate 4
NonamEVm002107t1	37.23	-3.34	1.01344	0.00026	0.00289	33.3727	39.8025	68.2843	24.4814	88.8902	64.1571	55.9651	22.2644	67.4022	20.3259	16.5559	58.292	60.5209	49.5463	38.0469	0	0	23.3366	80.0717	3.92185	0	3.88783	Cullin-4B
NonamEVm002109t1	83.54	-2.68	0.868513	0.000919	0.00707	159.408	239.387	104.227	95.8577	55.3079	356.502	163.58	126.123	77.8556	71.9933	69.031	62.4796	43.0394	52.8072	46.0213	0	0	21.7618	33.8871	15.951	1.58349	40.9723	NA
NonamEVm002113t1	34.55	-3.49	0.985682	9.51e-05	0.00139	47.4586	94.4305	105.58	21.5342	17.7637	89.8645	38.042	23.1577	31.9307	43.0011	36.3416	30.2848	10.9351	22.0423	22.7476	0	0	96.2671	15.9719	4.87817	0	7.76742	NA
NonamEVm002116t1	60.78	-3.28	1.13403	0.000971	0.00735	73.0763	71.439	78.0564	51.4091	35.1143	278.37	116.013	32.8922	30.5757	16.4675	1.75437	39.1917	106.968	52.9893	27.9268	201.641	0	87.6023	24.3141	10.5294	0	0.912972	NA
NonamEVm002117t1	60.28	-4.61	1.07314	1.25e-06	6.59e-05	62.3355	71.9809	46.5468	60.9671	124.823	115.741	64.9732	47.066	62.2471	58.1396	83.3235	88.6225	157.427	55.746	60.9597	62.5784	0	56.054	43.5271	0	0	3.11074	Sec1 family domain-containing protein 1
NonamEVm002118t1	21	-4.21	1.53672	0.000399	0.00392	7.12882	7.0828	52.4104	8.71321	28.9761	25.9834	34.1698	16.1708	17.7113	12.2694	0	130.262	5.90777	51.0749	48.1552	0	0	0	15.8839	0	0	0	RNA-binding protein MEX3B
NonamEVm002122t1	106.33	-3.56	0.96274	4.98e-05	0.000858	171.129	127.38	101.776	145.505	260.611	111.707	119.894	43.1198	131.511	117.666	213.577	191.093	192.029	83.5724	143.156	0	0	49.8736	115.318	14.1486	0	6.22582	Protein disulfide-isomerase A5
NonamEVm002125t1	24.35	-5.23	1.36428	2.66e-06	0.000113	11.1861	50.9034	34.4716	29.0805	46.3789	55.9599	27.85	8.73753	47.547	23.9579	25.49	37.6685	28.1744	32.9687	24.8438	0	0	13.0244	37.4238	0	0	0	Poly(A) RNA polymerase, mitochondrial
NonamEVm002128t1	22.44	-3.69	1.01201	5.36e-05	0.00091	17.8015	90.8305	45.0661	18.6568	13.558	7.97453	12.4899	7.8452	23.2769	14.8585	24.7173	34.8529	22.76	48.7831	25.1517	0	0	37.3342	41.4575	1.08768	0	5.18819	Iduronate 2-sulfatase
NonamEVm002131t1	30.27	-5.67	1.42503	6.19e-07	4.04e-05	21.3798	40.1322	85.8556	32.3595	20.963	23.9603	43.3293	21.5736	15.6911	23.2584	2.79114	32.3243	17.743	37.7476	14.922	109.543	0	56.0865	66.3331	0	0	0	ATP-binding cassette sub-family G member 1
NonamEVm002135t1	25.28	-4.64	1.43577	5.44e-05	0.00092	14.2472	41.3038	17.4524	26.1303	10.4809	31.9121	34.1532	7.35781	9.61828	15.5107	24.3284	27.6141	10.0183	19.7534	14.0735	15.6462	0	224.103	12.4422	0	0	0	Scoloptoxin SSD14
NonamEVm002142t1	88.52	-2.73	0.822704	0.000403	0.00395	187.185	173.556	74.276	88.3921	233.363	82.0064	127.122	59.7679	121.442	113.632	97.641	94.857	122.176	124.174	98.4245	0	0	31.2125	64.9023	9.77865	36.2275	7.24061	Serine/threonine-protein phosphatase 4 regulatory subunit 2
NonamEVm002144t1	142.25	-3.67	0.982874	3.87e-05	0.000723	325.989	323.258	148.928	155.101	301.901	198.333	177.137	69.1865	121.147	122.643	309.863	253.603	112.908	126.334	128.583	0	0	74.4233	143.018	23.8124	0	13.4132	Protein disulfide-isomerase A4
NonamEVm002145t1	33.58	-18.92	2.12366	1.3e-19	2.11e-16	10.8788	1.20119	13.3282	0	231.522	12.0463	14.7755	31.9319	88.2269	15.0424	11.2696	87.2253	0.462933	60.1372	102.025	0	0	0	58.7295	0	0	0	Rac GTPase-activating protein 1
NonamEVm002146t1	39.41	-5.7	1.34388	2.16e-07	1.85e-05	46.0191	21.102	62.1724	59.3363	56.9397	101.243	66.2141	15.5716	36.1823	51.3018	24.145	66.2712	115.522	42.8323	28.7771	46.6259	0	12.3914	14.4018	0	0	0	Protein numb
NonamEVm002154t1	2364.61	-4.1	1.17259	5.5e-05	0.000929	12693.4	4676.32	2169	1730.78	333.644	19420.4	821.314	196.594	188.427	466.308	3302.26	679.99	222.606	94.3788	504.525	3011.35	131.329	630.014	234.405	64.0273	250.438	199.747	Tissue factor pathway inhibitor
NonamEVm002156t1	104.82	-4.62	1.54493	0.000104	0.00148	162.056	189.952	79.9979	70.9101	15.099	1612.56	11.6603	2.94059	9.10696	21.311	62.9725	25.3474	4.5476	4.06338	3.40926	0	0	0	26.9362	0	0	3.10886	Tyrosine decarboxylase
NonamEVm002161t1	1253.93	-3.99	1.29693	0.000242	0.00276	100.782	490.726	711.302	977.208	1219.89	1626.52	10496.5	1482.98	626.454	3830.75	281.235	3214.93	30.3749	288.664	1786.27	245.827	53.4267	0	92.1715	0.853592	0	29.521	Laccase-2
NonamEVm002169t1	24.63	-3.55	0.969558	5.74e-05	0.000955	16.2932	14.3922	83.9484	31.4629	26.9036	31.0679	27.915	19.4284	25.6544	40.9276	57.6286	33.9136	20.9343	44.2554	28.2597	0	0	24.2413	9.12655	3.31492	0	2.10644	Aldehyde oxidase 3
NonamEVm002172t1	70.8	-4.01	0.989242	7.73e-06	0.000232	133.38	101.227	174.706	155.844	32.2901	195.6	143.005	33.4226	56.5687	125.053	27.5745	55.084	42.2394	66.6502	59.5509	0	0	99.8026	41.5538	9.81272	0	4.16046	NA
NonamEVm002186t1	45.48	-5.66	1.3291	2.18e-07	1.85e-05	317.64	171.908	51.0666	59.0709	20.7737	118.921	12.3368	7.6393	43.0892	64.394	71.4744	7.43904	18.6694	11.3741	9.85345	0	0	0	12.15	0	0	2.76964	NA
NonamEVm002187t1	28.13	-4.42	0.99487	8.85e-07	5.18e-05	72.9715	77.8452	36.3343	36.065	39.7471	111.591	39.545	7.8462	17.7108	12.2755	31.0975	21.4767	33.2405	31.3645	21.3166	0	0	12.439	11.7476	3.26355	0	1.03811	NA
NonamEVm002208t1	79.6	-3.33	1.01006	0.00026	0.00289	65.7441	68.3213	240.394	110.156	109.46	80.1634	273.345	107.844	102.715	111.388	16.3429	102.754	96.2457	107.456	53.5312	0	0	19.1698	64.2608	17.8277	0	4.17541	Ran-binding protein 9
NonamEVm002210t1	26.28	-21.78	1.97047	5.01e-29	1.95e-25	0	0	211.326	5.65251	39.1158	8.6741	69.3704	18.3568	9.14837	6.54879	18.3082	37.5744	15.9706	26.5482	44.2953	38.5731	0	0	28.7275	0	0	0	Major facilitator superfamily domain-containing protein 12
NonamEVm002212t1	23.09	-5.85	1.38628	1.69e-07	1.56e-05	80.099	51.8728	21.6873	17.2327	57.9598	47.827	23.5032	10.3223	18.346	27.4497	35.4348	27.5327	26.1926	23.3054	30.0678	0	0	0	9.0506	0	0	0	N-acetylgalactosaminyltransferase 6
NonamEVm002215t1	38.16	-3.35	0.859776	2.81e-05	0.000574	43.9916	43.5908	51.8011	53.0541	46.8903	135.751	67.1042	24.7981	35.3334	64.1569	38.6049	50.3609	35.5274	30.9843	40.0006	0	0	43.0718	25.9421	3.53007	0	5.12341	Vacuolar protein sorting-associated protein 33B
NonamEVm002247t1	102.35	-5.4	1.40444	1.76e-06	8.36e-05	337.346	205.695	30.6207	144.598	92.9332	508.582	47.8886	55.501	94.2447	42.0253	25.9404	149.447	20.4698	77.8643	128.855	0	0	181.226	105.097	3.26425	0	0	Trehalase
NonamEVm002255t1	26.36	-5.1	1.67617	3.53e-05	0.000676	0	2.3596	177.343	23.6351	12.0204	3.98552	25.8148	25.0212	44.5464	14.2198	7.97691	7.81445	97.0473	15.1083	8.10372	78.2122	0	24.8788	11.7528	0	0	0	NA
NonamEVm002258t1	403.25	-5.13	1.4183	6.74e-06	0.000212	3805.25	2405.21	372.585	361.659	8.96865	105.95	2.0308	3.11045	7.48968	21.3635	680.65	11.3192	6.47234	7.63266	6.66806	755.005	151.825	46.0407	63.8751	13.2737	0	35.1108	Glucose dehydrogenase [FAD, quinone]
NonamEVm002259t1	118.66	-5.29	1.55392	9.21e-06	0.000264	111.726	23.6354	16.7835	34.23	15.6639	24.5666	15.3276	5.32386	9.6486	73.298	9.99714	9.06902	142.63	8.37471	4.90345	727.069	302.053	1028.19	47.9511	0	0	0	Glucose dehydrogenase [FAD, quinone]
NonamEVm002265t1	28.77	-3.21	1.09696	0.000965	0.00733	17.1551	41.2743	22.5365	21.7166	78.778	34.0476	57.9067	25.8696	58.3366	63.8952	16.3246	35.3464	45.8104	50.4989	40.4723	0	0	0	18.5256	0	0	4.45918	Origin recognition complex subunit 2
NonamEVm002268t1	72.42	-3.51	0.827125	5.68e-06	0.000188	124.558	74.2982	108.971	134.281	124.159	111.529	164.398	54.9351	116.897	109.851	96.4927	56.0726	61.501	63.8796	73.765	0	0	31.0802	68.4252	9.79312	0	8.31025	NA
NonamEVm002291t1	95.69	-14.4	7.2971	3.82e-06	0.000145	0	11.368	60.9856	2.6636	0	0	0	0	0	0	198.212	68.1742	929.111	0	0	669.458	0	162.136	2.96055	0	0	0	NA
NonamEVm002293t1	132.44	-4.59	1.02934	6.29e-07	4.08e-05	108.225	123.38	92.7601	91.6894	280.127	137.331	211.967	130.2	351.543	204.362	100.36	208.328	121.625	386.788	239.605	0	0	31.0588	87.9692	4.32609	0	2.05957	Transcription factor AP-4
NonamEVm002298t1	31.28	-5.15	1.49862	1.12e-05	0.000303	15.5431	55.9954	50.3375	4.92025	167.053	56.1327	39.9296	19.3825	17.6619	29.8897	35.9421	61.8922	5.39522	41.0829	70.5357	0	0	0	16.3889	0	0	0	Organic cation transporter protein
NonamEVm002306t1	37.78	-6.28	1.36981	1.37e-08	2.56e-06	53.1911	95.8422	44.451	71.6664	74.164	123.396	87.0637	21.1842	35.2351	53.7589	13.0211	31.5016	35.6014	34.2391	22.1882	0	0	10.3368	24.2711	0	0	0	Ubiquitin carboxyl-terminal hydrolase BAP1
NonamEVm002322t1	30.81	-3.66	0.977784	3.86e-05	0.000722	110.314	42.4533	40.6788	42.2748	44.981	31.8613	26.2185	6.37624	44.0244	14.2156	32.6947	33.2078	40.5455	38.9225	25.1565	0	0	68.3679	26.9547	5.44052	0	3.11645	NA
NonamEVm002324t1	71.45	-4.91	1.09781	3.69e-07	2.76e-05	308.015	193.678	67.2042	83.0259	80.4228	211.204	55.8114	20.3059	55.0188	59.7292	68.2618	45.3822	54.8003	51.4572	52.1419	0	0	101.535	55.8449	0	0	7.99478	TBC1 domain family member 15
NonamEVm002337t1	228.26	-3.84	1.12538	0.000103	0.00147	574.799	380.349	519.442	401.342	45.6817	461.069	98.6988	31.204	57.7201	69.065	233.796	54.1635	170.406	47.137	61.3348	747.471	0	379.092	638.173	37.1907	0	13.5431	Probable E3 ubiquitin-protein ligase RNF144A
NonamEVm002347t1	97.32	-5.82	1.8001	4.7e-06	0.000166	148.841	153.331	39.4562	89.1849	11.3436	85.0788	19.7687	0	19.1151	21.8957	57.5288	24.8512	125.545	5.06091	8.66944	575.834	0	669.878	85.6407	0	0	0	NA
NonamEVm002355t1	39.42	-5.96	1.5495	5.28e-07	3.59e-05	43.4163	136.941	41.492	26.5052	22.8779	153.501	98.1064	33.7745	23.2471	30.5068	62.9952	54.0415	7.49448	37.5097	17.1216	0	0	72.6512	5.03469	0	0	0	NA
NonamEVm002359t1	123.29	3.02	0.961088	0.000576	0.00512	5.68673	71.6267	34.5398	34.7894	116.571	21.2012	36.789	142.007	104.472	52.5206	28.4726	137.326	34.7409	83.5372	152.655	0	86.8455	26.4693	192.189	716.204	77.1042	556.711	Medium-chain acyl-CoA ligase ACSF2, mitochondrial
NonamEVm002363t1	390.94	-4.59	1.34757	3.55e-05	0.000678	24.9503	43.676	4419.87	115.758	40.6885	125.92	324.188	117.11	117.902	92.3393	15.9427	268.021	512.123	356.926	199.856	1095.46	0	193.381	479.255	49.992	0	7.24571	T-complex protein 11-like protein 1
NonamEVm002365t1	20.1	-4.61	1.37907	4.05e-05	0.000746	28.8804	9.91645	25.9351	18.4024	37.7582	23.6371	35.6977	26.9633	34.2462	10.8857	7.0063	48.0168	21.4883	53.6067	32.011	0	0	0	27.8238	0	0	0	NA
NonamEVm002366t1	38.58	-3.19	1.05452	0.000727	0.00598	7.11422	25.9375	58.0836	68.3681	62.2266	121.362	64.9022	10.7932	50.0972	26.4972	31.9003	72.6026	46.4972	48.2293	45.2032	0	0	80.7265	22.8126	3.26531	0	2.07947	Rab proteins geranylgeranyltransferase component A 1
NonamEVm002383t1	30.05	-4.37	1.45895	0.000163	0.00206	0	12.0381	246.419	14.0209	18.6683	10.0588	97.0798	19.7743	35.8536	30.2566	3.74509	48.4982	14.0661	21.8127	31.9968	0	0	45.208	9.04718	0	0	2.60599	Protein tweety
NonamEVm002391t1	41.24	-3.9	0.965942	9.09e-06	0.000263	81.7306	108.59	46.4659	68.423	39.689	38.2085	79.6794	34.9363	58.4174	83.1683	20.9935	30.0237	96.2774	48.2362	28.6848	0	0	11.3577	23.3738	7.70942	0	1.22837	Zinc transporter 6
NonamEVm002394t1	25.36	16.53	2.29197	1.78e-14	1.65e-11	0	0	0	1.30381	14.7203	0	65.7463	49.6762	69.5942	13.8667	0	41.3446	45.8905	70.0256	71.1837	0	0	0	84.5693	14.8386	0	15.2621	NA
NonamEVm002396t1	20.6	-4.81	1.28821	7.94e-06	0.000236	14.6975	25.5962	21.5727	31.6021	38.803	58.2012	36.5165	32.4612	25.6138	23.0876	8.60797	19.2193	17.1041	43.2209	24.1596	0	0	12.8347	19.8078	0	0	0	Histone acetyltransferase KAT7
NonamEVm002402t1	1793.35	-2.95	0.815846	0.000117	0.00162	3751.76	2785.95	2605.56	2052.39	2109.13	7599.71	1320.72	540.745	1255.18	948.355	1388.64	1619.64	2165.23	1320.15	1336.56	1516.28	64.2264	2749.6	1412.95	407.004	374.585	129.273	Moesin/ezrin/radixin homolog 1
NonamEVm002419t1	113.22	-3.24	1.11123	0.000963	0.00732	55.46	158.58	154.522	72.7851	254.212	82.8872	108.582	54.5625	170.093	113.676	107.637	181.038	230.816	144.037	166.651	0	0	127.021	287.365	19.8369	0	1.11239	Mitochondrial import receptor subunit TOM70
NonamEVm002431t1	36.17	-4.52	1.35051	4.66e-05	0.000822	19.9431	25.3896	64.0391	27.9888	21.0969	26.4235	49.2922	28.2725	29.99	15.1149	3.65048	62.617	51.4085	48.436	37.017	127.378	0	114.188	42.3569	1.10615	0	0	Orphan steroid hormone receptor 2
NonamEVm002433t1	26.02	-5.31	1.50834	6.31e-06	0.000203	41.2974	21.1758	76.1697	22.2844	8.81981	118.087	46.3982	12.5765	20.0606	6.81449	1.25318	22.0808	13.5099	12.4695	11.5368	114.551	0	13.3898	9.88213	0	0	0	NA
NonamEVm002470t1	263.29	-4.49	1.00016	6.48e-07	4.13e-05	781.977	775.902	520.24	485.325	112.892	880.734	371.432	89.2333	155.186	260.12	217.208	89.4383	135.405	174.6	148.58	96.948	0	326.075	120.875	35.2508	0	14.9819	Protein-L-isoaspartate O-methyltransferase domain-containing protein 1
NonamEVm002472t1	34.28	-5.23	1.38109	3.06e-06	0.000126	10.6923	46.0386	43.6689	39.8318	65.6639	33.9651	53.7533	27.9397	51.6239	35.5258	53.4216	35.3682	70.0213	31.9314	38.363	0	0	99.7711	16.5791	0	0	0	NA
NonamEVm002493t1	22.29	-4.18	1.18595	4.43e-05	0.000794	34.669	55.001	20.8131	44.7697	25.514	30.151	32.0497	7.9735	31.1262	50.3847	17.9325	16.1053	13.834	16.1845	21.4332	0	0	47.054	22.9936	2.35875	0	0	NA
NonamEVm002510t1	422.11	-2.29	0.57837	4.46e-05	0.000797	818.997	581.693	531.991	451.562	732.185	626.644	662.204	349.459	571.1	642.956	411.197	563.1	369.437	497.472	533.742	77.3602	66.9408	135.53	307.205	180.289	51.472	123.965	RNA-binding protein Pasilla
NonamEVm002516t1	22.97	-4.03	1.07221	2.4e-05	0.000515	107.428	45.8038	52.439	40.1545	41.8104	23.4264	49.943	2.60203	32.5185	19.5474	24.0381	8.88193	11.0311	13.3651	15.9674	0	0	0	10.5599	0	0	5.78183	NA
NonamEVm002518t1	34.58	-3.48	1.00212	0.000121	0.00165	63.6923	63.82	55.6893	34.7033	93.8104	51.4892	50.1	27.6587	52.4395	48.4209	22.3944	51.8564	30.2123	37.0388	29.9905	0	0	0	38.1584	8.07886	0	1.28815	Ran GTPase-activating protein 1
NonamEVm002530t1	486.02	-3.21	1.11692	0.00111	0.00816	1199.31	1041.75	758.606	587.979	206.121	649.34	137.508	27.3023	147.575	214.936	403.818	216.701	136.641	86.3158	110.857	4062.88	0	306.574	218.044	37.9474	74.7194	67.4689	Hatching enzyme
NonamEVm002539t1	70.11	-3.51	0.900758	2.37e-05	0.00051	422.09	102.655	145.459	59.7195	88.139	239.487	43.73	26.47	69.8297	43.2749	59.3945	40.6772	21.8337	41.8021	45.6062	0	0	31.1441	22.7961	21.7459	0	16.5852	Fanconi anemia group D2 protein
NonamEVm002556t1	26.23	-3.46	1.1086	0.00041	0.004	52.6903	27.6219	24.865	26.6445	132.263	60.7282	32.5747	5.33029	28.7809	18.3005	17.2544	31.4807	7.0335	28.1214	29.096	0	0	26.9192	22.6163	4.72194	0	0	NA
NonamEVm002564t1	227.7	-4.19	1.22823	6.56e-05	0.00106	1644.36	951.171	409.322	530.906	40.957	381.261	30.672	11.5753	22.6817	39.8264	559.068	7.92157	10.2912	9.35979	8.8156	117.566	0	84.6229	82.8107	18.556	0	47.7247	NA
NonamEVm002574t1	48.86	-3.54	1.20391	0.000651	0.00555	86.894	88.1763	42.5795	72.0719	37.1422	141.246	103.793	9.73206	27.5214	44.278	51.9975	56.0005	55.9347	45.9907	74.1335	0	0	0	129.133	8.255	0	0	Krueppel-like factor 10
NonamEVm002578t1	47.3	-3.44	0.95495	7.92e-05	0.00121	54.7701	38.8806	33.3291	46.6631	134.075	38.6131	50.3367	26.8551	67.5125	55.8938	52.7576	53.0601	77.1509	70.7201	48.2854	130.524	0	22.0933	32.4831	3.86157	0	2.76279	Polycomb protein suz12-B
NonamEVm002587t1	22.42	-4	1.35874	0.000335	0.00346	2.00129	34.3352	39.5078	9.79389	30.712	28.8934	29.6085	42.77	52.9128	50.6296	35.2943	34.3506	22.5894	15.1168	34.4543	0	0	0	29.0778	0	0	1.22159	Arylsulfatase B
NonamEVm002597t1	55.96	-6.47	1.5013	2.68e-08	4.16e-06	127.649	80.069	61.5109	95.9077	73.1292	67.4098	81.2632	36.5351	66.7299	74.8995	60.9398	25.5862	53.8144	53.5362	29.9892	0	0	190.689	51.5153	0	0	0	Probable helicase senataxin
NonamEVm002598t1	20175.8	2.97	1.01446	0.0012	0.00862	1408.4	1113.76	10379.1	5681.8	1620.25	396.412	5125.41	11101.6	12770.9	7682.16	1666.71	24954.1	35168.3	33755.7	25000.9	20339.9	519.08	17079.5	71752	73817.5	48710.4	33824.7	Four and a half LIM domains protein 2
NonamEVm002600t1	22.48	-5.11	1.28308	1.9e-06	8.89e-05	7.08285	43.9987	25.1284	40.8342	32.1799	45.3363	40.0977	26.4748	39.3465	58.5562	29.393	17.5998	16.1441	38.8701	15.0158	0	0	13.7656	4.64383	0	0	0	tRNA pseudouridine(38/39) synthase
NonamEVm002608t1	130.75	-2.83	0.9613	0.00127	0.00903	171.207	248.881	108.3	144.819	399.297	116.622	105.87	62.0109	188.037	124.641	250.759	175.726	177.66	170.817	128.345	12.8933	0	130.64	109.961	29.6037	0	20.3104	Glucosidase 2 subunit beta
NonamEVm002623t1	150.26	-3.85	1.41452	0.000751	0.00613	506.694	112.315	397.978	99.9656	17.7259	1065.57	26.839	2.91821	20.0762	58.3123	196.925	521.215	11.7409	42.7041	41.0157	0	0	150.27	13.0221	6.63906	0	13.7261	NA
NonamEVm002625t1	61.73	-3.38	1.06922	0.00039	0.00386	35.1981	44.0621	90.1062	68.5989	114.218	136.268	229.558	187.967	66.3585	110.907	7.71503	46.7345	41.2884	123.601	41.7248	0	0	0	5.22793	1.48146	0	6.98529	Retrovirus-related Pol polyprotein from transposon 412
NonamEVm002650t1	59.98	-2.75	0.920118	0.00119	0.00861	70.697	49.139	125.314	34.9424	115.036	75.6894	78.6403	47.0448	99.6656	60.7273	79.3353	77.754	74.3387	113.415	79.3183	0	0	24.0987	89.222	15.8718	0	9.32763	Tether containing UBX domain for GLUT4
NonamEVm002654t1	20.4	-4.83	1.31621	9.71e-06	0.000274	17.7907	23.5891	24.6907	19.8966	58.2505	39.7873	34.9597	9.8195	30.3798	25.2224	41.4974	21.2449	13.2336	32.565	28.1648	0	0	6.20924	21.4458	0	0	0	Protein AATF
NonamEVm002661t1	47.36	-3.91	1.03889	2.63e-05	0.000546	106.01	47.3185	34.9412	71.4726	159.773	53.3286	134.109	25.6909	52.8221	70.826	33.7763	60.1533	38.6986	36.2277	70.0781	0	0	6.13354	34.3949	6.19998	0	0	Amidophosphoribosyltransferase
NonamEVm002664t1	79.16	-3.33	1.07101	0.000486	0.0045	76.138	64.2441	39.7334	77.2557	456.644	128.04	122.395	41.1266	91.1722	101.697	69.1347	238.384	25.7321	58.0835	94.8341	0	0	27.4459	18.9052	0	0	10.6364	NA
NonamEVm002667t1	118.04	-3.14	0.934934	0.000251	0.00282	221.303	224.05	97.5718	167.15	139.691	193.953	138.291	48.817	168.217	161.928	132.888	82.1569	69.0207	122.017	97.9829	324.489	0	104.316	62.2371	26.2368	0	14.4666	Puff-specific protein Bx42
NonamEVm002674t1	43.15	-3.72	1.17585	0.000266	0.00293	23.4398	29.2583	80.5146	54.2933	37.7353	167.383	44.0955	25.8125	20.5957	31.4365	28.8966	49.9173	49.7809	7.65938	15.6917	126.786	0	123.275	28.5904	0	0	4.2177	NA
NonamEVm002682t1	4505.66	4.46	0.859971	2.3e-08	3.73e-06	429.201	733.059	687.787	665.872	2083.98	607.771	1244.72	2429.93	2268.05	1188.44	2030.65	3377.02	3761.1	3011.83	3088.15	281.726	1287.8	820.98	7463.87	27606.7	3304.74	30751.2	ATP synthase subunit alpha, mitochondrial
NonamEVm002685t1	34.81	-4.06	1.44793	0.000447	0.00424	0	21.4801	70.1733	30.9456	28.4556	53.4412	200.909	83.1252	62.76	79.045	37.7433	10.965	34.3526	16.946	17.2867	0	0	17.1148	0	0	0	1.03284	NA
NonamEVm002701t1	210.93	-16.13	2.56982	2.26e-12	1.42e-09	0	3.57628	0	1.25694	4.21178	12.0888	2.10367	147.533	8.18182	0	3298.38	874.051	51.4929	48.8588	188.048	0	0	0	0.698247	0	0	0	Endochitinase
NonamEVm002707t1	105.5	4.44	1.17153	1.21e-05	0.00032	3.23649	0	22.6523	16.2667	27.1159	0	47.3489	173.03	102.246	58.7287	10.6345	81.0777	115.968	118.486	149.295	0	0	34.8467	60.5212	581.705	331.488	386.298	NA
NonamEVm002708t1	27.84	-3.18	0.912817	0.000158	0.00201	45.2702	64.5119	53.3789	36.9712	48.247	30.3816	13.0186	8.38921	26.1037	25.5092	21.846	41.4247	37.5604	29.1383	20.3139	0	0	59.8682	38.9868	7.01227	0	4.47083	NA
[truncated: 1,533 more rows]

## Sheet: S2vS3
transcript_id	baseMean	log2FoldChange	lfcSE	pvalue	padj	S1_1	S1_2	S1_4	S2_1	S2_2	S2_3	S2_4	S3_1	S3_2	S3_3	S3_4	S4_1	S4_2	S4_3	S4_4	S5_1	S5_2	S5_3	S5_4	S6_1	S6_2	S6_4	gene_name
[truncated: 28 more rows]

[truncated: 9 more sheets: S2vS4, S2vS5, S2vS6, S3vS4, S3vS5, S3vS6, S4vS5, S4vS6, S5vS6]
